# Supplementary material for: Anhydrides as α,β-unsaturated acyl ammonium precursors: isothiourea-promoted catalytic asymmetric annulation processes
Source: Royal Society of Chemistry journal article supplement (doi:10.1039/c3sc50199j), 2013-01-01
Supplement: c3sc50199j.pdf [file c3sc50199j.pdf]

## Anhydrides as $\alpha,\beta$ -unsaturated acyl ammonium precursors: Isothiourea-promoted catalytic asymmetric annulation process

Emily R. T. Robinson, Charlene Fallan, Carmen Simal, Alexandra M. Z. Slawin and Andrew D. Smith<sup>\*,†</sup>

<sup>†</sup> EaStCHEM, School of Chemistry, University of St Andrews  
North Haugh, St Andrews, Fife, UK, KY16 9ST.

E-mail: ads10@st-andrews.ac.uk

Homepage: <http://ch-www.st-andrews.ac.uk/staff/ads/group/>

### Supporting Information

| Contents                                                                                 | Page |
|------------------------------------------------------------------------------------------|------|
| <i>General Information</i>                                                               | S2   |
| <i>Preparation of <math>\alpha,\beta</math>-unsaturated anhydrides</i>                   | S3   |
| <i>Preparation of diketones</i>                                                          | S8   |
| <i>Preparation of azaaryl ketone</i>                                                     | S10  |
| <i>Asymmetric annulations with <math>\alpha,\beta</math>-unsaturated homoanhydrides:</i> |      |
| <i>General Procedure D: Ester Formation</i>                                              | S11  |
| <i>General Procedure E: Lactone Formation</i>                                            | S24  |
| <i>General Procedure F: Using Azaaryl Ketone</i>                                         | S30  |
| <i>Mechanistic Investigations</i>                                                        | S36  |
| <i>HPLC Traces</i>                                                                       | S39  |
| <i>NMR Spectra</i>                                                                       | S81  |
| <i>References</i>                                                                        | S171 |

## General Information

All reactions involving moisture sensitive reagents were performed under inert atmosphere (nitrogen or argon) *via* standard vacuum line techniques and with freshly dried solvents. All glassware was flame dried and allowed to cool under vacuum. Diethylether (Et<sub>2</sub>O), tetrahydrofuran (THF), toluene (PhMe), hexane and dichloromethane (CH<sub>2</sub>Cl<sub>2</sub>) were obtained dry from a solvent purification system (MBraun, SPS-800). Petroleum ether is defined as 40–60 petrol. All solvents and commercial reagents were used as supplied without further purification unless stated otherwise. Room temperature refers to 20–25 °C. Temperatures of 0 °C and –78 °C were achieved using ice/water and CO<sub>2</sub>(s)/acetone baths respectively. Reduced pressure refers to the use of a Büchi Rotavapor R-2000 rotary evaporator with a Vacubrand CVC<sub>2</sub> vacuum controller or a Heidolph Laborota 4001 rotary evaporator with a vacuum controller. Analytic thin layer chromatography was performed on aluminium sheets coated with 60 F<sub>254</sub> silica. TLC visualisation was carried out with ultraviolet light (254 nm), followed by staining 1% aq. KMnO<sub>4</sub> solution. Flash column chromatography was performed on Kieselgel 60 silica in the solvent system stated. <sup>1</sup>H and <sup>13</sup>C NMR spectra were acquired on either a Bruker Avance 300 {δ<sub>H</sub> (300 MHz), δ<sub>C</sub> (75 MHz)}, a Bruker Avance II 400 {δ<sub>H</sub> (400 MHz), δ<sub>C</sub> (100 MHz)}, a Bruker Avance 500 {δ<sub>H</sub> (500 MHz), δ<sub>C</sub> (125 MHz)} or a Bruker Avance III 500 {δ<sub>H</sub> (500 MHz), δ<sub>C</sub> (125 MHz)} spectrometer at ambient temperature and in the deuterated solvent stated. Coupling constants (*J*) are reported in Hz. Data are expressed in chemical shifts in parts per million (ppm) relative to residual solvent as the internal standard. Multiplicities are indicated by: s (singlet), d (doublet), t (triplet), q (quartet), quint (quintet), sextet, sept (septet) and m (multiplet). Ar stands for aromatic, *app* for apparent and *br* for broad. Infrared spectra (ν<sub>max</sub>) were recorded on a Shimadzu IRAffinity-1 fourier transform IR spectrophotometer using either thin film or solid using Pike MIRacle ATR accessory. Analysis was carried out using Shimadzu IRsolution v1.50, characteristic peaks are reported. Melting points were recorded on an electrothermal apparatus and are uncorrected. HPLC analyses were obtained on two different machines: a Gilson HPLC consisting of a Gilson 305 pump, Gilson 401C dilutor, Gilson 213XL sample injector and sample detection was performed with a Gilson 118UV/Vis detector; secondly a Shimadzu HPLC consisting of a DGU-20A5 degasser, LX-20AT liquid chromatograph, SIL-20AHT autosampler, CMB-20A column oven with variable temperature setting (25–40 °C). Separation was achieved using Chiralcel OD-H and OJ-H columns or Chiralpak AD-H, AS-H, IA, IC, IB and ID columns. Mass spectrometric (*m/z*) data was acquired either at the University of St Andrews Mass Spectrometry Facility or at the EPSRC National Mass Spectrometry Service Centre in Swansea.

HRMS carried out in St Andrews are quoted  $[M+H]$  and those carried out in Swansea are quoted  $[M+H]^+$ . Low and high resolution MS (ES) and MS (CI) were carried out on a Micromass LCT spectrometer and on a Micromass GCT spectrometer, respectively. Optical rotations were measured on a Perkin Elmer Precisely/Model-341 polarimeter operating at the sodium D line with a 100 mm path cell.

## Preparation of $\alpha,\beta$ -unsaturated homoanhydrides

### General Procedure A: in $\text{CH}_2\text{Cl}_2$

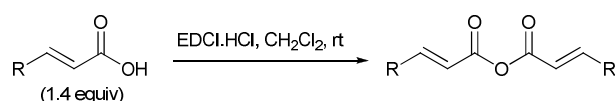

To a solution of carboxylic acid (1.4 equiv) in  $\text{CH}_2\text{Cl}_2$  (0.8 M) was added 1-ethyl-3-(3-dimethylaminopropyl)carbodiimide.HCl (EDCI.HCl) (1.0 equiv) and the solution stirred for 1-2 h at room temperature. The solution was diluted with  $\text{CH}_2\text{Cl}_2$  (50 mL) and then washed sequentially with water ( $2 \times 50$  mL) and saturated aqueous  $\text{NaHCO}_3$  solution (50 mL). The organic layer was dried over anhydrous  $\text{MgSO}_4$ , filtered, and concentrated *in vacuo* to afford the *homoanhydride*.

### General Procedure B: in THF

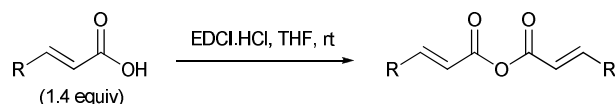

To a solution of carboxylic acid (1.4 equiv) in THF (0.8 M) was added 1-ethyl-3-(3-dimethylaminopropyl)carbodiimide.HCl (1.0 equiv) and the solution stirred for 1-2 h at room temperature. The solvent was removed *in vacuo* and the residue redissolved in  $\text{CH}_2\text{Cl}_2$  (50 mL) and then washed sequentially with water ( $2 \times 50$  mL) and saturated aqueous  $\text{NaHCO}_3$  solution (50 mL). The organic layer was dried over anhydrous  $\text{MgSO}_4$ , filtered, and concentrated *in vacuo* to afford the *homoanhydride*.

### (*E*)-Cinnamic anhydride (**3**)

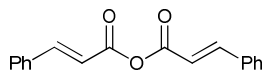

The title compound was prepared according to *General Procedure A* from (*E*)-cinnamic acid (741 mg, 5.00 mmol) and EDCI.HCl (959 mg, 5.00 mmol) in  $\text{CH}_2\text{Cl}_2$  (6 mL) to give the *homoanhydride* **3** as a white solid (448 mg, 64%); mp 118-120 °C {Lit.<sup>1</sup> 130 °C};  $\delta_{\text{H}}$  (400 MHz,  $\text{CDCl}_3$ ) 6.54 (2H, d,  $J$  16.0,

ArCH=CH), 7.40–7.47 (6H, m, ArH), 7.54–7.63 (4H, m, ArH), 7.86 (2H, d,  $J$  16.0, ArCH=CH). Data in agreement with the literature.<sup>1,2</sup>

**(E)-3-(4-(Trifluoromethyl)phenyl)acrylic anhydride (S1)**

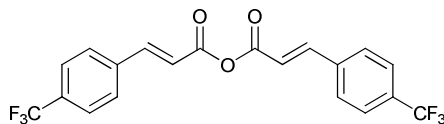

The title compound was prepared according to *General Procedure A* from 4-trifluoromethylcinnamic acid (1080 mg, 5.00 mmol) and EDCI.HCl (959 mg, 5.00 mmol) in CH<sub>2</sub>Cl<sub>2</sub> (10 mL) to give the *homoanhydride S1* as a white solid (425 mg, 41%); mp 127–128 °C;  $\nu_{\max}$  (film)/cm<sup>-1</sup> 1757, 1705 (C=O), 1631 (C=C), 1321 (CF<sub>3</sub>);  $\delta_{\text{H}}$  (300 MHz, CDCl<sub>3</sub>) 6.61 (2H, d,  $J$  16.0, CH=CHCO), 7.69 (8H, s, ArH), 7.88 (2H, d,  $J$  16.0, CH=CHCO);  $\delta_{\text{C}}$  (75 MHz, DMSO) 119.7 (2×CH=CHCO), 123.9 (q, <sup>1</sup> $J_{\text{CF}}$  270.8, 2×CF<sub>3</sub>), 125.9 (q, <sup>3</sup> $J_{\text{CF}}$  3.7, 4×ArC(3)), 129.6 (4×ArC(2)), 130.8 (q, <sup>2</sup> $J_{\text{CF}}$  32.0, 2×ArC(4)), 137.5 (2×ArC(1)), 146.7 (2×CH=CHCO), 162.2 (2×CO);  $\delta_{\text{F}}$  (282 MHz, CDCl<sub>3</sub>) –63.5;  $m/z$  (ES<sup>+</sup>) 437 ([M+Na]<sup>+</sup>, 20%), 301 ([M-6F]<sup>+</sup>, 100%); HRMS (ES<sup>+</sup>) C<sub>20</sub>H<sub>12</sub>F<sub>6</sub>O<sub>3</sub>Na<sup>+</sup> ([M+Na]<sup>+</sup>) requires 437.0585, found 437.0588 (–0.8 ppm).

**(E)-3-(4-Fluorophenyl)acrylic anhydride (S2)**

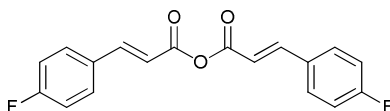

The title compound was prepared according to *General Procedure A* from (*E*)-3-(4-fluorophenyl)acrylic acid (166 mg, 1.00 mmol) and EDCI.HCl (96 mg, 0.50 mmol) in CH<sub>2</sub>Cl<sub>2</sub> (4 mL) to give the *homoanhydride S2* as a white solid (207 mg, 66%); mp 86–90 °C;  $\nu_{\max}$  (film)/cm<sup>-1</sup> 1755, 1699 (C=O), 1595, 1508;  $\delta_{\text{H}}$  (300 MHz, CDCl<sub>3</sub>) 6.44 (2H, d,  $J$  16.2, ArCH=CH), 7.07–7.16 (4H, m, ArH), 7.54–7.61 (4H, m, ArH), 7.81 (2H, d,  $J$  16.2, ArCH=CH);  $\delta_{\text{C}}$  (75 MHz, CDCl<sub>3</sub>) 116.3 (d, <sup>2</sup> $J_{\text{CF}}$  22.1, 4×ArC(3)), 116.4 (d, <sup>6</sup> $J_{\text{CF}}$  2.2, 2×CH=CHCO), 129.9 (d, <sup>4</sup> $J_{\text{CF}}$  3.3, 2×ArC(1)), 130.6 (d, <sup>3</sup> $J_{\text{CF}}$  8.7, 4×ArC(2)), 147.3 (2×CH=CHCO), 162.3 (2×CO), 164.4 (d, <sup>1</sup> $J_{\text{CF}}$  253.2, 2×ArC(4));  $\delta_{\text{F}}$  (300 MHz, CDCl<sub>3</sub>) –108.1;  $m/z$  (FTMA<sup>+</sup>) 149 ([M-C<sub>9</sub>H<sub>6</sub>FO<sub>2</sub>]<sup>+</sup>, 100%), 315 ([M+H]<sup>+</sup>, 25%); HRMS (FTMS<sup>+</sup>) C<sub>18</sub>H<sub>13</sub>F<sub>2</sub>O<sub>3</sub> ([M+H]<sup>+</sup>) requires 315.0827, found 315.0831 (+1.2 ppm).

**(E)-3-(4-Methoxyphenyl)acrylic 3-(4-methoxyphenyl)propanoic anhydride (S3)**

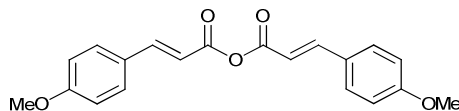

The title compound was prepared according to *General Procedure B* from 4-methoxycinnamic acid (891 mg, 5.00 mmol) and EDCI.HCl (959 mg, 5.00 mmol) in THF (20 mL) to give the *homoanhydride* **S3** as a white solid (442 mg, 52%); mp 116-119 °C {Lit.<sup>2</sup> 104-105 °C};  $\delta_{\text{H}}$  (400 MHz, CDCl<sub>3</sub>) 3.86 (6H, s, ArOCH<sub>3</sub>), 6.39 (2H, d, *J* 15.8, ArCH=CH), 6.91-6.96 (4H, m, ArH), 7.50-7.57 (4H, m, ArH), 7.80 (2H, d, *J* 15.8, ArCH=CH). Data in agreement with the literature.<sup>2</sup>

**(E)-3-(Furan-2-yl)acrylic anhydride (S4)**

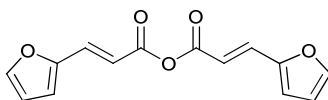

The title compound was prepared according to *General Procedure B* from furylacrylic acid (690 mg, 5.00 mmol) and EDCI.HCl (959 mg, 5.00 mmol) in THF (10 mL) to give the *homoanhydride* **S4** as a brown solid (485 mg, 75%); mp 68-71 °C;  $\nu_{\text{max}}$  (film)/cm<sup>-1</sup> 3142 (C-H), 3123 (C-H), 2965 (C-H), 2936 (C-H), 2909 (C-H), 2856 (C-H), 2818 (C-H), 1772 (C=O), 1695 (C=O), 1624 (furan), 1555 (furan), 1474 (furan), 1226 (C-O);  $\delta_{\text{H}}$  (300 MHz, CDCl<sub>3</sub>) 6.39 (2H, d, *J* 15.5, CH=CHCO), 6.53 (2H, dd, *J* 3.5, 1.8, furanylC(4)H), 6.75 (2H, d, *J* 3.5, furanylC(3)H), 7.55 (2H, d, *J* 1.7, furanylC(5)H), 7.58 (2H, d, *J* 15.5, CH=CHCO);  $\delta_{\text{C}}$  (75 MHz, CDCl<sub>3</sub>) 112.9 (2×furanylC(4)), 114.3 (2×furanylC(3)), 117.1 (2×CH=CHCO), 134.3 (2×CH=CHCO), 146.0 (2×furanylC(5)), 150.6 (2×furanylC(2)), 162.7 (2×C=O); *m/z* (NSI<sup>+</sup>) 297 ([M+K]<sup>+</sup>, 100%), 281 ([M+Na]<sup>+</sup>, 20%); HRMS (NSI<sup>+</sup>) C<sub>14</sub>H<sub>10</sub>O<sub>5</sub>Na<sup>+</sup> ([M+Na]<sup>+</sup>) requires 281.0420, found 281.0424 (+1.3 ppm).

**(E)-3-(Thiophen-2-yl)acrylic anhydride (S5)**

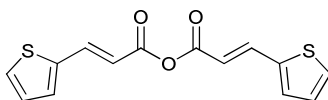

The title compound was prepared according to *General Procedure B* from thienylacrylic acid (770 mg, 5.00 mmol) and EDCI.HCl (959 mg, 5.00 mmol) in THF (10 mL) to give the *homoanhydride* **S5** as a brown solid (522 mg, 72%); mp 86-88 °C;  $\nu_{\text{max}}$  (film)/cm<sup>-1</sup> 2972 (C-H), 1728 (C=O); 3069 (C-H), 3026 (C-H), 2966 (C-H), 1761 (C=O), 1694 (C=C), 1616 (C=C), 1413 (C-O), 1236 (C-S-C);  $\delta_{\text{H}}$  (300 MHz, CDCl<sub>3</sub>) 6.30 (2H, d, *J* 15.7, CH=CHCO), 7.10 (2H, dd, *J* 5.0, 3.7, thienylC(4)H), 7.31-7.38 (2H, d, *J* 3.7, thienylC(3)H), 7.48 (2H, d, *J* 5.0, 1.0, thienylC(5)H), 7.94 (2H, dt, *J* 15.7, 0.8, CH=CHCO);  $\delta_{\text{C}}$  (75

MHz, CDCl<sub>3</sub>) 115.3 (2×CH=CHCO), 128.6 (2×thienylC(4)), 130.3 (2×thienylC(5)), 132.7 (2×thienylC(3)), 139.1 (2×thienylC(2)), 141.0 (2×CH=CHCO), 162.4 (2×C=O); *m/z* (ES<sup>+</sup>) 313 ([M+Na]<sup>+</sup>, 100%); HRMS (ES<sup>+</sup>) C<sub>14</sub>H<sub>10</sub>O<sub>3</sub>NaS<sub>2</sub><sup>+</sup> ([M+Na]<sup>+</sup>) requires 312.9961, found 312.9969 (−2.6 ppm).

### (*E*)-3-(3-Methylphenyl)acrylic anhydride (S6)

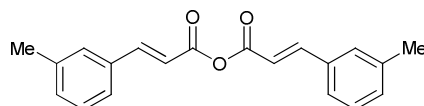

The title compound was prepared according to *General Procedure B* from 3-methylcinnamic acid (810 mg, 5.00 mmol) and EDCI.HCl (576 mg, 3.00 mmol) in CH<sub>2</sub>Cl<sub>2</sub> (10 mL) to give the *homoanhydride* **S6** as a white solid (582 mg, 76%); mp 61–64 °C;  $\nu_{\max}$  (film)/cm<sup>−1</sup> 2918 (C–H), 1755 (C=O), 1697 (C=O), 1697 (C=C);  $\delta_{\text{H}}$  (400 MHz, CDCl<sub>3</sub>) 2.39 (6H, s, CH<sub>3</sub>), 6.52 (2H, d, *J* 15.9, CH=CHCO), 7.16–7.42 (8H, m, ArH), 7.83 (2H, d, *J* 15.9, CH=CHCO);  $\delta_{\text{C}}$  (75 MHz, CDCl<sub>3</sub>) 21.5 (2×CH<sub>3</sub>), 116.4 (2×CH=CHCO), 126.0 (2×ArC(6)H), 129.1 (2×ArC(2)H), 129.3 (2×ArC(4)H), 132.3 (2×ArC(5)H), 133.8 (2×ArC(1)), 138.9 (2×ArC(3)), 149.0 (2×CH=CHCO), 162.7 (2×CO); *m/z* (ES<sup>+</sup>) 329 ([M+Na]<sup>+</sup>, 100%); HRMS (ES<sup>+</sup>) C<sub>20</sub>H<sub>18</sub>O<sub>3</sub>Na<sup>+</sup> ([M+Na]<sup>+</sup>) requires 329.1156, found 329.1154 (+0.7 ppm).

### (*E*)-3-(3-Chlorophenyl)acrylic anhydride (S7)

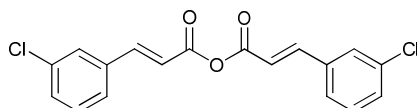

The title compound was prepared according to *General Procedure A* from 3-chlorocinnamic acid (732 mg, 4.00 mmol) and EDCI.HCl (461 mg, 2.40 mmol) in CH<sub>2</sub>Cl<sub>2</sub> (20 mL) to give the *homoanhydride* **S7** as a white solid (389 mg, 56%); mp 96–99 °C;  $\nu_{\max}$  (film)/cm<sup>−1</sup> 3082 (C–H), 1759 (C=O), 1632 (C=C), 1095 (C–Cl);  $\delta_{\text{H}}$  (400 MHz, CDCl<sub>3</sub>) 6.52 (2H, d, *J* 15.9, CH=CHCO), 7.33–7.49 (6H, m, ArH), 7.57 (2H, t, *J* 1.7, ArH), 7.78 (2H, d, *J* 15.9, CH=CHCO);  $\delta_{\text{C}}$  (100 MHz, CDCl<sub>3</sub>) 118.2 (2×CH=CHCO), 126.9 (2×ArCH), 128.4 (2×ArCH), 130.5 (2×ArCH), 131.3 (2×ArCH), 135.3 (2×ArC), 135.6 (2×ArC), 147.2 (2×CH=CHCO), 162.0 (2×C=O); *m/z* (ES<sup>+</sup>) 369 ([M+Na]<sup>+</sup>, 10%); HRMS (ES<sup>+</sup>) C<sub>18</sub>H<sub>12</sub>Cl<sub>2</sub>O<sub>3</sub>Na<sup>+</sup> ([M+Na]<sup>+</sup>) requires 369.0065, found 369.0061 (+0.9 ppm).

**(E)-3-(2-Chlorophenyl)acrylic anhydride (S8)**

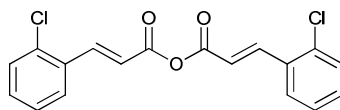

The title compound was prepared according to *General Procedure A* from 2-chlorocinnamic acid (913 mg, 5.00 mmol) and EDCI.HCl (576 mg, 3.0 mmol) in CH<sub>2</sub>Cl<sub>2</sub> (20 mL) to give the *homoanhydride* **S8** as a white solid (417 mg, 48%); mp 139-139 °C;  $\nu_{\max}$  (film)/cm<sup>-1</sup> 3082 (C-H), 1759 (C=O), 1632 (C=C), 1078 (C-Cl);  $\delta_{\text{H}}$  (400 MHz, CDCl<sub>3</sub>) 6.54 (2H, d, *J* 16.0, CH=CHCO), 7.30-7.40 (4H, m, ArH), 7.44-7.47 (2H, m, ArC(5)H), 7.68 (2H, dd, *J* 7.6, 1.7, ArC(6)H), 8.29 (2H, d, *J* 16.0, CH=CHCO);  $\delta_{\text{C}}$  (100 MHz, CDCl<sub>3</sub>) 119.4 (2×CH=CHCO), 127.4 (2×ArCH), 128.1 (2×ArCH), 130.5 (2×ArCH), 132.1 (2×ArCH), 132.2 (2×ArCCl), 135.6 (2×ArC), 144.4 (2×CH=CHCO), 161.9 (2×CO); *m/z* (ES<sup>+</sup>) 369 ([M+Na]<sup>+</sup>, 50%); HRMS (ES<sup>+</sup>) C<sub>18</sub>H<sub>12</sub>Cl<sub>2</sub>O<sub>3</sub>Na<sup>+</sup> ([M+Na]<sup>+</sup>) requires 369.0054, found 369.0061 (-1.9 ppm).

**(E)-But-2-enoic anhydride (S9)**

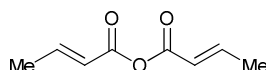

The title compound was prepared according to *General Procedure A* from crotonic acid (258 mg, 3.00 mmol) and EDCI.HCl (576 mg, 3.00 mmol) in CH<sub>2</sub>Cl<sub>2</sub> (6 mL) to give the *homoanhydride* **S9** as a colourless oil (136 mg, 59%);  $\delta_{\text{H}}$  (400 MHz, CDCl<sub>3</sub>) 1.95 (6H, dd, *J* 7.0, 1.7, CH<sub>3</sub>), 5.91 (2H, dq, *J* 15.5, 1.7, CH<sub>3</sub>CH=CH), 7.14 (2H, dq, *J* 15.5, 7.0, CH<sub>3</sub>CH=CH). Data in agreement with the literature.<sup>3</sup>

**(E)-Hex-2-enoic anhydride (S10)**

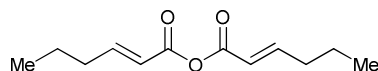

The title compound was prepared according to *General Procedure A* from *trans*-2-hexenoic acid (342 mg, 3.00 mmol) and EDCI.HCl (576 mg, 3.00 mmol) in CH<sub>2</sub>Cl<sub>2</sub> (6 mL) to give the *homoanhydride* **S10** as a colourless oil (171 mg, 54%);  $\nu_{\max}$  (film)/cm<sup>-1</sup> 2962 (C-H), 2934 (C-H), 2874 (C-H), 1780 (C=O), 1722 (C=O), 1645 (C=C);  $\delta_{\text{H}}$  (300 MHz, CDCl<sub>3</sub>) 0.88 (6H, t, *J* 7.4, CH<sub>3</sub>), 1.45 (4H, h, *J* 7.4, C(5)H<sub>2</sub>), 2.17 (4H, qd, *J* 7.2, 1.6, C(4)H<sub>2</sub>), 5.81 (2H, dt, *J* 15.6, 1.6, CH=CHCO), 7.06 (2H, dt, *J* 15.6, 7.0, CH=CHCO);  $\delta_{\text{C}}$  (75 MHz, CDCl<sub>3</sub>) 13.6 (2×CH<sub>3</sub>), 21.1 (2×C(5)H<sub>2</sub>), 34.5 (2×C(4)H<sub>2</sub>), 120.6 (2×CH=CHCO), 154.0 (2×CH=CHCO), 162.1 (2×CO); *m/z* (NSI<sup>+</sup>) 228 ([M+NH<sub>4</sub>]<sup>+</sup>, 100%); HRMS (NSI<sup>+</sup>) C<sub>12</sub>H<sub>22</sub>NO<sub>3</sub><sup>+</sup> ([M+NH<sub>4</sub>]<sup>+</sup>) requires 228.1594, found 228.1596 (+0.8 ppm).

### (Z)-Cinnamic anhydride (**22**)

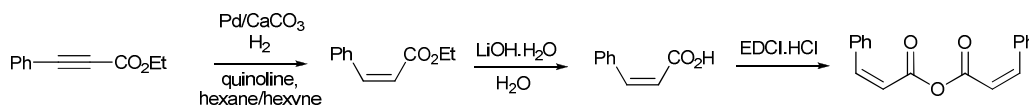

### (Z)-Ethyl cinnamate (**S11**)

Ethyl phenylpropiolate (1.0 mL, 6.0 mmol) was dissolved in a mixture of hexane and 1-hexene (7:2 v/v, 12 mL), under N<sub>2</sub> atm at rt, followed by addition of quinoline (1.1 mL, 9 mmol) and palladium on calcium carbonate (Lindlar's catalyst, 360 mg). The resulting reaction mixture was connected to a hydrogen-filled balloon (1 atm) and stirred at rt. The progress of the reaction was monitored by TLC (CH<sub>2</sub>Cl<sub>2</sub>). The starting alkyne was consumed after 1 h and the reaction was stopped by displacement of the hydrogen atmosphere with nitrogen. The resulting mixture was filtered through a Celite pad, and the filtrate was washed with 10% acetic acid (4×50 mL), water (3×50 mL), and saturated NaHCO<sub>3</sub> (4×50 mL) and dried (MgSO<sub>4</sub>). Solvent was removed under reduced pressure, and the residue was purified by column chromatography to give the *ester S11* as a clear oil (458 mg, 43%) in >99% purity (a mixture containing 76% *cis*-ethyl cinnamate, 18% over-reduced alkane and 6% *trans*-ethyl cinnamate was observed in the <sup>1</sup>H-NMR of the unpurified reaction mixture); δ<sub>H</sub> (300 MHz, CDCl<sub>3</sub>) 1.25 (3H, t, *J* 7.2, CH<sub>3</sub>), 4.17 (2H, q, *J* 7.2, OCH<sub>2</sub>), 5.95 (1H, d, 12.6, PhCH=CH), 6.95 (1H, d, 12.6, PhCH=CH), 7.32-7.39 (3H, m, ArH), 7.56-7.60 (2H, m, ArH). Data in agreement with the literature.<sup>4</sup>

### (Z)-Cinnamic acid (**S12**)

To a solution of *cis*-ethyl cinnamate (458 mg, 2.60 mmol) in THF (37 mL), was added a solution of LiOH.H<sub>2</sub>O (327 mg, 7.80 mmol) in H<sub>2</sub>O (12 mL) at rt. The resulting reaction mixture was heated at 60 °C for 16 h. Then it was cooled to rt and acidified with 8 N HCl aq. The aqueous phase was extracted with Et<sub>2</sub>O (3×50mL) and the combined organic layers were dried (MgSO<sub>4</sub>). Solvent was removed under reduced pressure to give the *acid S12* as a pale yellow solid (327 mg, 85%); mp 64-68 °C {Lit.<sup>11</sup> 66-68 °C}; δ<sub>H</sub> (400 MHz, CDCl<sub>3</sub>) 5.97 (1H, d, *J* 12.8, PhCH=CH), 7.07 (1H, d, *J* 12.8, PhCH=CH), 7.34-7.39 (3H, m, ArH), 7.58-7.62 (2H, m, ArH). Data in agreement with the literature.<sup>5</sup>

### (Z)-Cinnamic anhydride (**22**)

The title compound was prepared according to *General Procedure A* from (*Z*)-cinnamic acid (318 mg, 2.15 mmol) and EDCI.HCl (206 mg, 1.07 mmol) in CH<sub>2</sub>Cl<sub>2</sub> (10 mL) to give the *homoanhydride 22* as a white gum<sup>i</sup> (169 mg, 56%); ν<sub>max</sub> (film)/cm<sup>-1</sup> 2963 (C-H), 1778 (C=O), 1717 (C=O), 1616 (C=C), 1020

<sup>i</sup> The product was approximately 90% pure and used without further purification.



(C-O);  $\delta_{\text{H}}$  (400 MHz,  $\text{CDCl}_3$ ) 5.85 (2H, d,  $J$  12.5, ArCH=CH), 7.11 (2H, d,  $J$  12.5, ArCH=CH), 7.32-7.42 (6H, m, ArH), 7.56-7.71 (4H, m, ArH);  $\delta_{\text{C}}$  (100 MHz,  $\text{CDCl}_3$ ) 117.8 ( $2 \times$ ArCH=CH), 126.3 ( $4 \times$ ArCH), 130.0 ( $2 \times$ ArCH), 130.2 ( $4 \times$ ArCH), 134.2 ( $2 \times$ ArC), 147.9 ( $2 \times$ ArCH=CH), 161.4 ( $2 \times$ CO);  $m/z$  ( $\text{ES}^+$ ) 301 ( $[\text{M}+\text{Na}]^+$ , 100%); HRMS ( $\text{ES}^+$ )  $\text{C}_{18}\text{H}_{14}\text{O}_3\text{Na}^+$  ( $[\text{M}+\text{Na}]^+$ ) requires 301.0841, found 301.0840 (-0.3 ppm).

## Preparation of Diketones

### General Procedure C: using LiHMDS

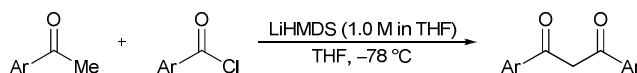

To a solution of arylketone (1.0 equiv) in THF (10 mL) at  $-78$  °C was added LiHMDS (1.0 M in THF, 1.5 equiv) over 15 mins and the resulting mixture stirred at  $-78$  °C for 1 h. Acid chloride (1.2 equiv) was added dropwise as a solution in THF (2 mL) at  $-78$  °C over 5 mins and the solution warmed to room temperature over 1 h and stirred for a further 17 h. The reaction was quenched with 10% citric acid (20 mL) and extracted with EtOAc ( $2 \times 100$  mL). The combined organics were washed with  $\text{H}_2\text{O}$  (20 mL), dried over anhydrous  $\text{MgSO}_4$ , filtered and concentrated *in vacuo*. Purification of the residue by chromatography gave the *diketone*.

### 1,3-bis(Furan-2-yl)propane-1,3-dione (S13)

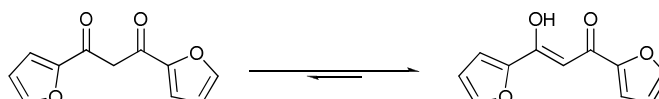

The title compound was prepared according to *General Procedure C* from 2-acetylfuran (550 mg, 5.00 mmol), furoyl chloride (590  $\mu\text{L}$ , 6.00 mmol) and LiHMDS (1.0 M in THF, 7.50 mL, 7.50 mmol) and purified by chromatography (20%  $\text{Et}_2\text{O}$ /petrol) to afford the *diketone* **S13** as a pale-yellow solid (443 mg, 43% yield); mp  $73-74$  °C {Lit.<sup>5</sup>  $74-75$  °C};  $\delta_{\text{H}}$  (400 MHz,  $\text{CDCl}_3$ ) 6.59 (2H, dd,  $J$  3.5, 1.7, Ar(4)H), 6.62 (1H, s, =CH), 7.21 (2H, dd,  $J$  3.5, 0.8, Ar(3)H), 7.62 (2H, dd,  $J$  1.7, 0.8, Ar(5)H). Data in agreement with the literature.<sup>6</sup>

### 1,3-bis(4-Bromophenyl)propane-1,3-dione (S14)

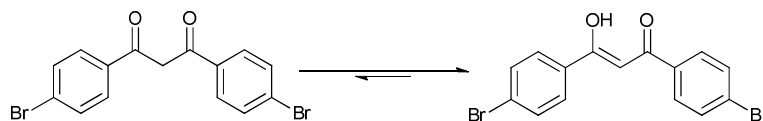

The title compound was prepared according to *General Procedure C* from 4-bromoacetophenone (995 mg, 5.00 mmol), 4-bromobenzoyl chloride (1.31 g, 6.00 mmol) and LiHMDS (1.0 M in THF, 7.50 mL, 7.50 mmol) and purified by chromatography (20% Et<sub>2</sub>O/petrol) to afford the *diketone* **S14** as a pale-yellow powder (550 mg, 29% yield); mp 185-186 °C {Lit.<sup>8</sup> 185-186 °C};  $\delta_{\text{H}}$  (400 MHz, CDCl<sub>3</sub>) 6.79 (1H, s, =CH), 7.64 (4H, d, *J* 8.7, Ar(3)*H*), 7.85 (4H, d, *J* 8.7, Ar(2)*H*). Data in agreement with the literature.<sup>7</sup>

### 1,3-bis(4-Methylphenyl)propane-1,3-dione (S15)

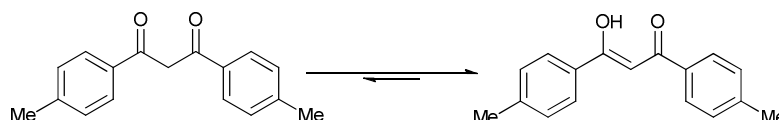

The title compound was prepared according to *General Procedure C* from 4-methylacetophenone (671 mg, 5.00 mmol), 4-toluoyl chloride (928 mg, 6.00 mmol) and LiHMDS (1.0 M in THF, 7.50 mL, 7.50 mmol) and purified by chromatography (20% Et<sub>2</sub>O/petrol) to afford the *diketone* **S15** as a pale-yellow solid (499 mg, 40% yield); mp 125-126 °C {Lit.<sup>7</sup> 127-127.4 °C};  $\delta_{\text{H}}$  (400 MHz, CDCl<sub>3</sub>) 2.44 (6H, s, 2×ArCH<sub>3</sub>), 6.83 (1H, s, =CH), 7.30 (4H, d, *J* 8.1, Ar(3)*H*), 7.90 (4H, dd, *J* 8.1, Ar(2)*H*). Data in agreement with the literature.<sup>8</sup>

### 2-Phenacylbenzothiazole (35)

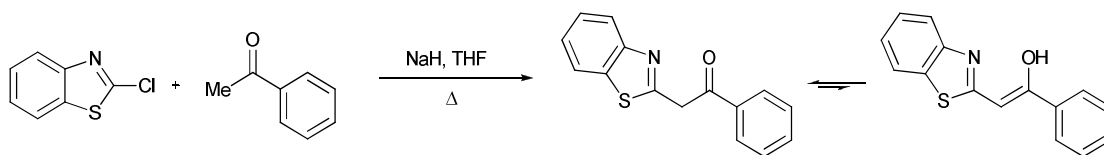

Acetophenone (9.32 mL, 80.0 mmol) was added slowly to a suspension of sodium hydride (60% in mineral oil, 4.80 g, 120 mmol) in dry THF (60 mL) under argon and the flask stirred for 10 minutes. 2-Chlorobenzothiazole (12.5 mL, 96.0 mmol) was added dropwise and the reaction heated at reflux for 15 hours. The reaction was quenched by dropwise addition of water at 0 °C, the acidified to pH 1-2 using a solution of 1M HCl. The mixture was diluted with ethyl acetate (150 mL) and then washed sequentially with water (100 mL × 2) and saturated NaHCO<sub>3</sub> solution (100 mL). The organic layer was dried over anhydrous MgSO<sub>4</sub>, filtered, and concentrated *in vacuo*. The crude solid was recrystallised

from toluene to give *azaaryl ketone* **35** as a yellow solid (10.22 g, 50%); mp 115-117 °C {Lit.<sup>9</sup> 113-114 °C};  $\delta_{\text{H}}$  (400 MHz,  $\text{CDCl}_3$ ) 4.85 (2H, s, *keto*- $\text{CH}_2\text{COAr}$ ), 6.38 (1H, s, *enol*- $\text{CHCOHAr}$ ), 7.31 (1H, t,  $J$  7.6, *enol*-benzothiazoleC(6) $H$ ), 7.39 (1H, t,  $J$  7.5, *enol*-benzothiazoleC(6) $H$ ), 7.42 – 7.52 (6H, m,  $\text{ArH}$ ), 7.51 (1H, t,  $J$  7.7, *enol*-benzothiazoleC(4) $H$ ), 7.62 (1H, t,  $J$  7.4, *keto*-benzothiazoleC(5) $H$ ), 7.79 (1H, d,  $J$  7.9, *enol*-benzothiazoleC(4) $H$ ), 7.82 (1H, d,  $J$  8.2, *enol*-benzothiazoleC(7) $H$ ), 7.88 (3H, m, *keto*-benzothiazoleC(4) $H$ , *enol*-phenacylC(2') $H$ ), 8.02 (1H, d,  $J$  8.0, *keto*-benzothiazoleC(7) $H$ ), 8.10 (2H, d,  $J$  7.5 *keto*-phenacylC(2') $H$ ). Data in agreement with the literature.<sup>9</sup>

## Asymmetric Annulations with $\alpha,\beta$ -unsaturated anhydrides

### (*R*)-*B*-benzoyl-4,6-diphenyl-3,4-dihydro-2*H*-pyran-2-one (**2**)

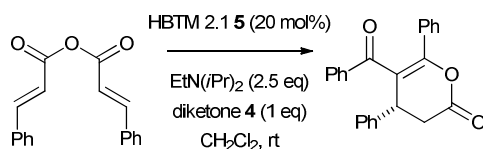

To a solution of (*E*)-cinnamic homoanhydride (100 mg, 0.36 mmol) in dry  $\text{CH}_2\text{Cl}_2$  (0.25 ml) under argon, was added 1,3-diphenyl-1,3-propanedione (40 mg, 0.18 mmol), HBTM 2.1 (11.1 mg, 0.036 mmol) and diisopropylethylamine (78  $\mu\text{L}$ , 0.45 mmol) at 0 °C. The reaction mixture was stirred and gradually warmed to room temperature over 5 h. The solvent was removed *in vacuo* and the residue was purified by column chromatography on silica gel ( $\text{CH}_2\text{Cl}_2$ ) to afford *lactone* **2** as a white solid (30 mg, 49%); mp 120-125 °C;  $[\alpha]_{\text{D}}^{22}$   $-7.6$  ( $c$  0.5 in  $\text{CHCl}_3$ ); {Lit.<sup>9</sup>  $[\alpha]_{\text{D}}^{22}$   $-6.5$  ( $c$  1.0 in  $\text{CHCl}_3$ ) 95% ee}; chiral HPLC analysis, ChiralPak AD-H (20% *i*-PrOH:hexane, flow rate 1.0 mL  $\text{min}^{-1}$ , 254 nm, 20 °C),  $t_{\text{R}}$  major: 14.7 min,  $t_{\text{R}}$  minor: 32.4 min, 95% ee;  $\delta_{\text{H}}$  (300 MHz,  $\text{CDCl}_3$ ) 3.04 (1H, dd,  $J$  15.9, 2.5, C(3) $H_2$ ), 3.19 (1H, dd,  $J$  15.9, 7.7, C(3) $H_2$ ), 4.55 (1H, dd,  $J$  7.7, 2.5, C(4) $H$ ), 7.02-7.29 (11H, m,  $\text{ArH}$ ), 7.32-7.38 (2H, m,  $\text{ArH}$ ), 7.44-7.51 (2H, m,  $\text{ArH}$ ). Data in agreement with the literature.<sup>10</sup>

### General Procedure D: Ring-opening with MeOH

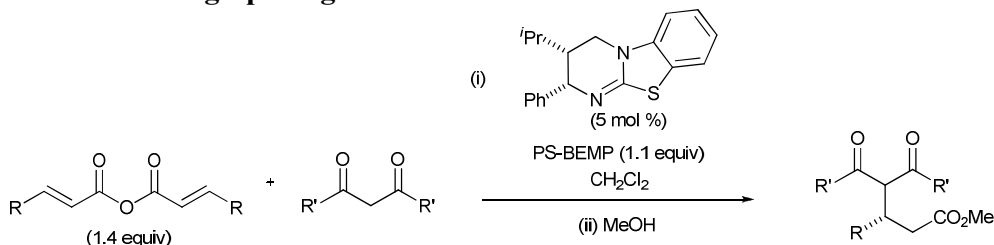

To a solution of the corresponding *homoanhydride* (1.4 equiv) in dry  $\text{CH}_2\text{Cl}_2$  (0.72 mL) under argon, was added isothiurea (HBTM 2.1, 0.05 equiv) and polymer-bound 2-*tert*-butylimino-2-diethylamino-1,3-dimethylperhydro-1,3,2-diazaphosphorine (BEMP) (1.1 equiv) at 0 °C followed by addition of the

corresponding *diketone* (1.0 equiv). The reaction mixture was stirred at 0 °C and gradually warmed to room temperature over 5 h. The reaction was quenched with MeOH (2 mL) and stirred at room temperature for 16 h. The solvent was removed *in vacuo* and the residue was purified by column chromatography on silica gel (CH<sub>2</sub>Cl<sub>2</sub>→2%EtOAc/ CH<sub>2</sub>Cl<sub>2</sub>) to afford the *ester* **6-22**.

### (3S)-Methyl 4-benzoyl-5-oxo-3,5-diphenylpentanoate (**6**)

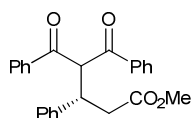

The title compound was prepared according to *General Procedure D* from (*E*)-cinnamic anhydride (70 mg, 0.25 mmol), 1,3-diphenyl-1,3-propanedione (40 mg, 0.18 mmol), HBTM 2.1 (2.8 mg, 0.009 mmol), BEMP (2.0 mmol/g loading, 90 mg, 0.20 mmol) and purified by chromatography (CH<sub>2</sub>Cl<sub>2</sub>→2%EtOAc/CH<sub>2</sub>Cl<sub>2</sub>) to afford the *ester* **6** as a white solid (53 mg, 83%); mp 104-107 °C;  $[\alpha]_D^{22} +9.6$  (*c* 0.25 in CHCl<sub>3</sub>); chiral HPLC analysis, ChiralPak AD-H (20% *i*-PrOH:hexane, flow rate 1.0 mL min<sup>-1</sup>, 220 nm, 30 °C), *t*<sub>R</sub> major: 11.8 min, *t*<sub>R</sub> minor: 17.0 min, 96% ee;  $\nu_{\max}$  (film)/cm<sup>-1</sup> 2367 (C-H), 1742 (C=O), 1690 (C=O), 1653 (C=O), 1489 (CH<sub>3</sub>-O);  $\delta_H$  (400 MHz, CDCl<sub>3</sub>) 2.77-2.93 (2H, m, C(2)H<sub>2</sub>), 3.50 (3H, s, OCH<sub>3</sub>), 4.40 (1H, td, *J* 9.5, 4.9, C(3)H), 5.84 (1H, d, *J* 9.5, C(4)H), 7.04-7.19 (3H, m, ArH), 7.21-7.33 (4H, m, ArH), 7.37-7.48 (3H, m, ArH), 7.54 (1H, t, *J* 7.4, ArH), 7.75 (2H, dd, *J* 8.3, 1.3, ArH), 7.98 (2H, dd, *J* 8.5, 1.1, ArH);  $\delta_C$  (100 MHz, CDCl<sub>3</sub>) 38.2 (C(2)), 42.8 (C(3)), 51.7 (OCH<sub>3</sub>), 62.4 (C(4)), 127.2 (ArC(4)H), 128.5 (2×ArCH), 128.6 (2×ArCH), 128.7 (2×ArCH), 128.7 (2×ArCH), 129.0 (4×ArCH), 133.4 (ArCH), 133.8 (ArCH), 136.7 (ArC), 136.9 (ArC), 140.4 (ArC), 172.1 (C(1)), 194.5 (CO), 194.8 (CO); *m/z* (NSI<sup>+</sup>) 387 ([M+H]<sup>+</sup>, 100%), 404 ([M+NH<sub>4</sub>]<sup>+</sup>, 35%); HRMS (NSI<sup>+</sup>) C<sub>25</sub>H<sub>23</sub>O<sub>4</sub> ([M+H]<sup>+</sup>) requires 387.1591, found 387.1596 (+1.3 ppm).

### (3S)-Methyl 4-benzoyl-3-(4-trifluoromethylphenyl)-5-oxo-5-phenylpentanoate (**7**)

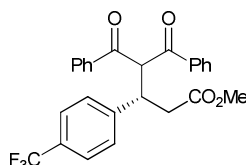

The title compound was prepared according to *General Procedure D* from (*E*)-4-trifluoromethyl cinnamic anhydride (103 mg, 0.25 mmol), 1,3-diphenyl-1,3-propanedione (40 mg, 0.18 mmol), HBTM 2.1 (2.8 mg, 0.009 mmol) and BEMP (2.0 mmol/g loading, 90 mg, 0.20 mmol) and purified by chromatography (CH<sub>2</sub>Cl<sub>2</sub>→2%EtOAc/CH<sub>2</sub>Cl<sub>2</sub>) to afford the *ester* **7** as a white solid (64 mg, 79%); mp

142-145 °C;  $[\alpha]_D^{22}$   $-2.5$  ( $c$  1.0 in  $\text{CHCl}_3$ ); chiral HPLC analysis, ChiralPak AD-H, (20% *i*-PrOH:hexane, flow rate 1.0 mL min<sup>-1</sup>, 254 nm, 20 °C),  $t_R$  major: 12.7 min,  $t_R$  minor: 22.1 min, 97% ee;  $\nu_{\text{max}}$  (film)/cm<sup>-1</sup> 2972 (C-H), 2853 (C-H), 2322 (C-H), 1734 (C=O), 1684 (C=O), 1325 (CF<sub>3</sub>);  $\delta_H$  (400 MHz, CDCl<sub>3</sub>) 2.76-2.99 (2H, m, C(2)*H*), 3.51 (3H, s, OCH<sub>3</sub>), 4.46 (1H, td,  $J$  9.5, 4.7, C(3)*H*), 5.84 (1H, d,  $J$  9.5, C(4)*H*), 7.27-7.51 (9H, m, ArH), 7.52-7.62 (1H, m, ArH), 7.66-7.80 (2H, m, ArH), 7.95-8.03 (2H, m, ArH);  $\delta_C$  (75 MHz, CDCl<sub>3</sub>) 37.9 (C(2)), 42.5 (C(3)), 51.8 (OCH<sub>3</sub>), 61.8 (C(4)), 124.1 (q,  $^1J_{\text{CF}}$  270.2, CF<sub>3</sub>), 125.5 (q,  $^3J_{\text{CF}}$  3.7, C(3)ArC(3)), 128.6 (2×ArCH), 128.8 (2×ArCH), 129.0 (2×ArCH), 129.0 (2×ArCH), 129.1 (2×ArCH), 129.4 (q,  $^2J_{\text{CF}}$  32.3, C(3)ArC(4)), 133.7 (ArC(4)H), 134.1 (ArC(4)H), 136.5 (ArC), 136.6 (ArC), 144.7 (ArC), 171.8 (C(1)), 194.2 (CO), 194.5 (CO);  $\delta_F$  (282 MHz, CDCl<sub>3</sub>)  $-63.14$ ;  $m/z$  (NSI<sup>+</sup>) 472 ([M+NH<sub>4</sub>]<sup>+</sup>, 100%), 455 ([M+H]<sup>+</sup>, 90%); HRMS (NSI<sup>+</sup>) C<sub>26</sub>H<sub>22</sub>F<sub>3</sub>O<sub>4</sub> ([M+H]<sup>+</sup>) requires 455.1465, found 455.1467 (+0.5 ppm).

### (3S)-Methyl 4-benzoyl-3-(4-fluorophenyl)-5-oxo-5-phenylpentanoate (8)

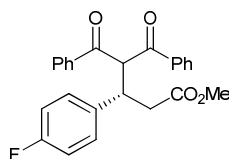

The title compound was prepared according to *General Procedure D* from (*E*)-3-(4-fluorophenyl)acrylic anhydride (79 mg, 0.25 mmol), 1,3-diphenylpropane-1,3-dione (40 mg, 0.18 mmol), HBTM 2.1 (2.8 mg, 0.009 mmol) and BEMP (2.0 mmol/g loading) (90 mg, 0.20 mmol) in CH<sub>2</sub>Cl<sub>2</sub> (0.25 mL) and purified by chromatography (CH<sub>2</sub>Cl<sub>2</sub>→2%EtOAc/CH<sub>2</sub>Cl<sub>2</sub>) to afford the *ester 8* as a white solid (60 mg, 82%); mp 92-96 °C;  $[\alpha]_D^{22}$   $+20.2$  ( $c$  1.0 in  $\text{CHCl}_3$ ); chiral HPLC analysis, ChiralPak IA (20% *i*-PrOH:hexane, flow rate 1.0 mL min<sup>-1</sup>, 254 nm, 30 °C),  $t_R$  major: 10.0 min,  $t_R$  minor: 14.3 min, 95% ee;  $\nu_{\text{max}}$  (film)/cm<sup>-1</sup> 2951 (C-H), 1734 (C=O), 1694 (C=O), 1260 (C-F);  $\delta_H$  (400 MHz, CDCl<sub>3</sub>) 2.78 (1H, dd,  $J$  15.6, 9.6, C(2)*H*), 2.87 (1H, dd,  $J$  15.6, 9.6, C(2)*H*), 3.51 (3H, s, OCH<sub>3</sub>), 4.39 (1H, ddd,  $J$  9.6, 9.6, 4.6, C(3)*H*), 5.79 (1H, d,  $J$  9.6, C(4)*H*), 6.81-6.87 (2H, m, ArH), 7.19-7.24 (2H, m, ArH), 7.30-7.34 (2H, m, ArH), 7.41-7.58 (4H, m, ArH), 7.74-7.76 (2H, m, ArH), 7.98-8.00 (2H, m, ArH);  $\delta_C$  (100 MHz, CDCl<sub>3</sub>) 38.4 (C(2)), 42.1 (C(3)), 51.8 (OCH<sub>3</sub>), 62.5 (C(4)), 115.4 (d,  $^2J_{\text{CF}}$  21.4, C(3)ArC(3)H), 128.7 (2×ArCH), 128.8 (2×ArCH), 129.0 (2×ArCH), 129.1 (2×ArCH), 130.2 (d,  $^3J_{\text{CF}}$  8.1, C(3)ArC(2)H), 133.5 (ArC(4)H), 134.0 (ArC(4)H), 136.1 (ArC), 136.6 (ArC), 136.8 (ArC), 161.8 (d,  $^1J_{\text{CF}}$  240.3, CF), 172.0 (C(1)), 194.4 (CO), 194.6 (CO);  $\delta_F$  (300MHz, CDCl<sub>3</sub>)  $-115.9$ ;  $m/z$  (NSI<sup>+</sup>) 405 ([M+H]<sup>+</sup>, 100%), 422 ([M+NH<sub>4</sub>]<sup>+</sup>, 45%); HRMS (NSI<sup>+</sup>) C<sub>25</sub>H<sub>22</sub>FO<sub>4</sub> ([M+H]<sup>+</sup>) requires 405.1497, found 405.1496 (-0.2 ppm).

**(3S)-Methyl 4-benzoyl-3-(4-methoxyphenyl)-5-oxo-5-phenylpentanoate (9)**

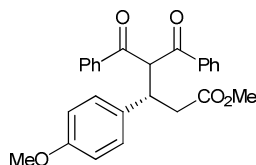

The title compound was prepared according to *General Procedure D* from (*E*)-3-(4-methoxyphenyl)acrylic anhydride (85 mg, 0.25 mmol), 1,3-diphenylpropane-1,3-dione (40 mg, 0.18 mmol), HBTM 2.1 (2.8 mg, 0.009 mmol) and BEMP (2.0 mmol/g loading) (90 mg, 0.20 mmol) in CH<sub>2</sub>Cl<sub>2</sub> (0.25 mL) and purified by chromatography (CH<sub>2</sub>Cl<sub>2</sub>→2%EtOAc/CH<sub>2</sub>Cl<sub>2</sub>) to afford the *ester 9* as a pale yellow solid (33 mg, 44%); mp 110-114 °C;  $[\alpha]_D^{22}$  +18.1 (*c* 1.0 in CHCl<sub>3</sub>); chiral HPLC analysis, ChiralPak AD-H (15% *i*-PrOH:hexane, flow rate 1.0 mL min<sup>-1</sup>, 254 nm, 20 °C), *t*<sub>R</sub> major: 26.7 min, *t*<sub>R</sub> minor: 44.7 min, 94% ee;

The reaction was repeated using a modified *General Procedure D* with increased catalyst loading from (*E*)-3-(4-methoxyphenyl)acrylic anhydride (85 mg, 0.25 mmol), 1,3-diphenylpropane-1,3-dione (40 mg, 0.18 mmol), HBTM 2.1 (5.6 mg, 0.018 mmol) and BEMP (2.0 mmol/g loading) (90 mg, 0.20 mmol) in CH<sub>2</sub>Cl<sub>2</sub> (0.25 mL) and purified by chromatography (CH<sub>2</sub>Cl<sub>2</sub>→2%EtOAc/CH<sub>2</sub>Cl<sub>2</sub>) to afford the *ester 9* as a pale yellow solid (42 mg, 56%); mp 110-114 °C;  $[\alpha]_D^{22}$  +8.2 (*c* 1.0 in CHCl<sub>3</sub>); chiral HPLC analysis, ChiralPak AD-H (15% *i*-PrOH:hexane, flow rate 1.0 mL min<sup>-1</sup>, 254 nm, 20 °C), *t*<sub>R</sub> major: 26.7 min, *t*<sub>R</sub> minor: 44.7 min, 88% ee;  $\nu_{\max}$  (film)/cm<sup>-1</sup> 1732 (C=O), 1690 (C=O), 1252 (C-O), 1159 (C-O);  $\delta_H$  (300 MHz, CDCl<sub>3</sub>) 2.78 (1H, dd, *J* 15.6, 9.6, C(2)*H*), 2.86 (1H, dd, *J* 15.6, 5.1, C(2)*H*), 3.50 (3H, s, CO<sub>2</sub>CH<sub>3</sub>), 3.70 (3H, s, ArOCH<sub>3</sub>), 4.36 (1H, ddd, *J* 9.6, 9.6, 4.8, C(3)*H*), 5.80 (1H, d, *J* 9.6, C(4)*H*), 6.66-6.71 (2H, m, Ar*H*), 7.13-7.18 (2H, m, Ar*H*), 7.28-7.57 (6H, m, Ar*H*), 7.74-7.78 (2H, m, Ar*H*), 7.98-8.00 (2H, m, Ar*H*);  $\delta_C$  (75 MHz, CDCl<sub>3</sub>) 38.5 (C(2)), 42.1 (C(3)), 51.7 (CO<sub>2</sub>CH<sub>3</sub>), 55.2 (OCH<sub>3</sub>), 62.7 (C(4)), 113.9 (2×C(4)ArC(3)H), 128.7 (2×C(4)ArC(2)H), 128.7 (2×ArCH), 129.0 (4×ArCH), 129.5 (2×ArCH), 132.3 (ArC), 133.3 (ArCH), 133.8 (ArCH), 136.8 (ArC), 136.9 (ArC), 158.5 (ArC), 172.2 (C(1)), 194.6 (CO), 194.9 (CO); *m/z* (NSI<sup>+</sup>) 417 ([M+H]<sup>+</sup>, 85%), 434 ([M+NH<sub>4</sub>]<sup>+</sup>, 100%); HRMS (NSI<sup>+</sup>) C<sub>26</sub>H<sub>25</sub>O<sub>5</sub> ([M+H]<sup>+</sup>) requires 417.1697, found 417.1699 (+0.6 ppm).

**(3S)-Methyl 4-benzoyl-3-(furan-2-yl)-5-oxo-5-phenylpentanoate (10)**

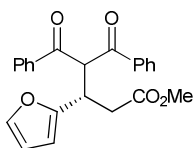

The title compound was prepared according to *General Procedure D* from (*E*)-furylacrylic anhydride (65 mg, 0.25 mmol), 1,3-diphenyl-1,3-propanedione (40 mg, 0.18 mmol), HBTM 2.1 (2.8 mg, 0.009 mmol) and BEMP (2.0 mmol/g loading) (90 mg, 0.20 mmol) in CH<sub>2</sub>Cl<sub>2</sub> (0.25 mL) and purified by chromatography (CH<sub>2</sub>Cl<sub>2</sub>→2%EtOAc/CH<sub>2</sub>Cl<sub>2</sub>) to afford the *ester 10* as a dark yellow solid (46 mg, 69%); mp 74-77 °C;  $[\alpha]_D^{22} +30.6$  (*c* 0.5 in CHCl<sub>3</sub>); chiral HPLC analysis, ChiralPak AD-H (20% *i*-PrOH:hexane, flow rate 1.0 mL min<sup>-1</sup>, 254 nm, 20 °C), *t<sub>R</sub>* major: 15.0 min, *t<sub>R</sub>* minor: 17.1 min, 96% ee;  $\nu_{\max}$  (film)/cm<sup>-1</sup> 1738 (C=O), 1697 (C=O), 1655(C=O), 1593 (furan), 1578 (furan), 1508 (furan), 1445 (C-O);  $\delta_H$  (400 MHz, CDCl<sub>3</sub>) 2.78-2.94 (2H, m, C(2)H<sub>2</sub>), 3.60 (3H, s, OCH<sub>3</sub>), 4.46 (1H, td, *J* 8.9, 4.5, C(3)H), 5.97-6.09 (3H, m, furanyl(H)), 7.13-7.19 (1H, m, C(4)H<sub>2</sub>), 7.33-7.43 (4H, m, ArH), 7.45-7.56 (2H, m, ArH), 7.87 (4H, ddd, *J* 17.5, 8.4, 1.1, ArH);  $\delta_C$  (100 MHz, CDCl<sub>3</sub>) 35.9 (C(2)H<sub>2</sub>), 36.3 (C(3)H), 51.9 (OCH<sub>3</sub>), 58.7 (C(4)H), 107.8 (furanylC(4)H), 110.5 (furanylC(3)H), 128.7 (2×ArCH), 128.7 (2×ArCH), 128.8 (2×ArCH), 129.0 (2×ArCH), 133.5 (ArC(4)H), 133.8 (ArC(4)H), 136.2 (ArC(1)), 136.6 (ArC(1)), 141.6 (furanylC(5)H), 153.2 (furanylC(2)), 172.1 (C(1)), 194.4 (CO), 194.7 (CO); *m/z* (NSI<sup>+</sup>) 377 ([M+H]<sup>+</sup>, 100%), 394 ([M+NH<sub>4</sub>]<sup>+</sup>, 45%); HRMS (NSI<sup>+</sup>) C<sub>23</sub>H<sub>21</sub>O<sub>5</sub> ([M+H]<sup>+</sup>) requires 377.1384, found 377.1387 (+0.9 ppm).

**(3S)-Methyl 4-benzoyl-5-oxo-5-phenyl-3-(thiophen-2-yl)pentanoate (11)**

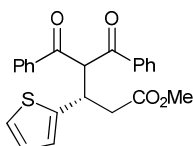

The title compound was prepared according to *General Procedure D* from (*E*)-thienyl acrylic anhydride (73 mg, 0.25 mmol), 1,3-diphenyl-1,3-propanedione (40 mg, 0.18 mmol), HBTM 2.1 (2.8 mg, 0.009 mmol) and BEMP (2.0 mmol/g loading) (90 mg, 0.20 mmol) in CH<sub>2</sub>Cl<sub>2</sub> (0.25 mL). and purified by chromatography (CH<sub>2</sub>Cl<sub>2</sub>→ 2%EtOAc/CH<sub>2</sub>Cl<sub>2</sub>) to afford the *ester 11* as a dark yellow solid (51 mg, 86%); mp 91-94 °C;  $[\alpha]_D^{22} +29.5$  (*c* 0.4 in CHCl<sub>3</sub>); chiral HPLC analysis, ChiralPak AD-H (20% *i*-PrOH:hexane, flow rate 1.0 mL min<sup>-1</sup>, 254 nm, 20 °C), *t<sub>R</sub>* major: 16.1 min, *t<sub>R</sub>* minor: 22.9 min, 94% ee;  $\nu_{\max}$  (film)/cm<sup>-1</sup> 1736 (C=O), 1686 (C=O), 1655 (C=O), 1593 (C-C), 1578 (C-C), 1445 (C-O), 1263 (C-S);  $\delta_H$  (400 MHz, CDCl<sub>3</sub>) 2.80-2.99 (2H, m, C(2)H<sub>2</sub>), 3.58 (3H, s, OCH<sub>3</sub>), 4.70 (1H, td, *J* 8.9,

4.5, C(3)H), 5.99 (1H, d,  $J$  9.0, C(4)H), 6.74 (1H, dd,  $J$  5.1, 3.5, thienylC(4)H), 6.80-6.85 (1H, m, thienylC(3)H), 7.03 (1H, dd,  $J$  5.1, 0.9, thienylC(5)H), 7.30-7.58 (6H, m, ArH), 7.80-7.86 (2H, m, ArH), 7.94-8.00 (2H, m, ArH);  $\delta_C$  (100 MHz, CDCl<sub>3</sub>) 38.2 (C(3)H), 39.0 (C(2)H), 51.9 (OCH<sub>3</sub>), 62.0 (C(4)H), 124.4 (thienylC(5)H), 126.5 (thienylC(3)H), 126.8 (thienylC(4)H), 128.8 (4×ArCH), 129.0 (2×ArCH), 129.0 (2×ArCH), 133.5 (ArC(4)H), 133.9 (ArC(4)H), 136.6 (ArC), 136.7 (ArC), 143.5 (thienylC(2)), 172.1 (C(1)), 194.4 (CO), 194.5 (CO);  $m/z$  (NSI<sup>+</sup>) 393 ([M+H]<sup>+</sup>, 55%); HRMS (NSI<sup>+</sup>) C<sub>23</sub>H<sub>21</sub>O<sub>4</sub>S ([M+H]<sup>+</sup>) requires 393.1155, found 393.1157 (+0.5 ppm).

**(3S)-Methyl 4-benzoyl-3-(3-methylphenyl)-5-oxo-5-phenylpentanoate (12)**

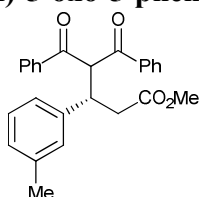

The title compound was prepared according to *General Procedure D* from (*E*)-3-(3-methylphenyl)acrylic anhydride (76 mg, 0.25 mmol), 1,3-diphenyl-1,3-propanedione (40 mg, 0.18 mmol), and purified by chromatography (CH<sub>2</sub>Cl<sub>2</sub>→2%EtOAc/CH<sub>2</sub>Cl<sub>2</sub>) to afford the *ester 12* as an off-white solid (56 mg, 75%); mp 110-112 °C;  $[\alpha]_D^{22}$  +19.8 ( $c$  0.8 in CHCl<sub>3</sub>); chiral HPLC analysis, Chiralcel AD-H (20% *i*-PrOH:hexane, flow rate 1.0 mL min<sup>-1</sup>, 254 nm, 30 °C)  $t_R$  major (*3S*): 9.9 min,  $t_R$  minor (*3R*): 13.3 min, 91% ee;  $\nu_{\max}$  (film)/cm<sup>-1</sup> 1728 (C=O, ester), 1688 (C=O), 1668 (C=O) 1257 (CH<sub>3</sub>-O);  $\delta_H$  (400 MHz, CDCl<sub>3</sub>) 2.20 (3H, s, ArCH<sub>3</sub>), 2.81 (1H, dd,  $J$  15.7, 9.3, C(2)H<sub>2</sub>), 2.89 (1H, dd,  $J$  15.7, 5.0, C(2)H<sub>2</sub>), 3.51 (3H, s, CO<sub>2</sub>CH<sub>3</sub>), 4.36 (1H, td,  $J$  9.3, 5.0, C(3)H), 5.83 (1H, d,  $J$  9.4, C(4)H), 6.94-6.82 (1H, m, C(3)Ar(2)H), 7.03 (3H, dd,  $J$  4.9, 3.8, C(3)Ar(4,5,6)H), 7.37-7.29 (2H, m, ArH), 7.49-7.37 (3H, m, ArH), 7.55 (1H, tt,  $J$  7.4, 2.8, ArH), 7.84-7.71 (2H, m, ArH), 8.04-7.93 (2H, m, ArH);  $\delta_C$  (100 MHz, CDCl<sub>3</sub>) 21.3 (C(3)ArCH<sub>3</sub>), 38.0 (C(2)), 42.5 (C(3)), 51.5 (CO<sub>2</sub>CH<sub>3</sub>), 62.1 (C(4)), 125.3 (C(3)ArC(6)), 127.8 (C(3)ArC(2)), 128.3 (C(3)ArCH), 128.4 (2×C(5)ArCH), 128.5 (2×C(5)ArCH), 128.8 (4×C(5)ArCH), 129.2 (C(3)ArCH), 133.1 (C(5)ArCH), 133.6 (C(5)ArC(4)H), 136.6 (C(5)ArC(1)), 136.8 (C(5)ArC(1)), 137.9 (C(3)ArC(3)), 140.1 (C(3)ArC(1)), 172.04 (C(1)), 194.4 (ArC), 194.8 (ArC);  $m/z$  (ESI<sup>+</sup>) 401 ([M+H]<sup>+</sup>, 100%); HRMS (ESI<sup>+</sup>) C<sub>26</sub>H<sub>25</sub>O<sub>4</sub> ([M+H]<sup>+</sup>), found 401.1750, requires 401.1747 (+0.7 ppm).



**(3S)-Methyl 4-benzoyl-3-(3-chlorophenyl)-5-oxo-5-phenylpentanoate (13)**

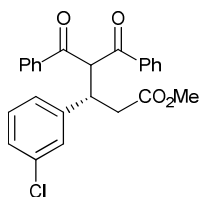

The title compound was prepared according to *General Procedure D* from (*E*)-3-(3-chlorophenyl)acrylic anhydride (87 mg, 0.25 mmol), 1,3-diphenylpropane-1,3-dione (40 mg, 0.18 mmol), HBTM 2.1 (2.8 mg, 0.009 mmol) and BEMP (2.0 mmol/g loading) (90 mg, 0.20 mmol) in CH<sub>2</sub>Cl<sub>2</sub> (0.25 mL) and purified by chromatography (CH<sub>2</sub>Cl<sub>2</sub>→2%EtOAc/CH<sub>2</sub>Cl<sub>2</sub>) gave the *ester* **13** as a pale yellow solid (51 mg, 67%); mp 124-126 °C;  $[\alpha]_D^{22} +18.1$  (*c* 1.0 in CHCl<sub>3</sub>); chiral HPLC analysis, ChiralPak AD-H (20% *i*-PrOH:hexane, flow rate 1.0 mL min<sup>-1</sup>, 220 nm, 30 °C), *t*<sub>R</sub> major: 10.3 min, *t*<sub>R</sub> minor: 13.2 min, 96% ee; *v*<sub>max</sub> (film)/cm<sup>-1</sup> 2361 (C-H), 1738 (C=O), 1684 (C=O), 1261 (C-O);  $\delta_H$  (400 MHz, CDCl<sub>3</sub>) 2.74-2.95 (2H, m, C(2)H<sub>2</sub>), 3.52 (3H, s, OCH<sub>3</sub>), 4.36 (1H, td, *J* 9.5, 4.6, C(3)H), 5.82 (1H, d, *J* 9.5, C(4)H), 7.01-7.17 (3H, m, ArH), 7.24 (1H, d, *J* 1.8, ArH), 7.29-7.38 (2H, m, ArH), 7.38-7.51 (3H, m, ArH), 7.55 (1H, tt, *J* 6.9, 1.2, ArH), 7.77 (2H, dd, *J* 8.4, 1.2, ArH), 7.98 (2H, dd, *J* 8.4, 1.2, ArH);  $\delta_C$  (100 MHz, CDCl<sub>3</sub>) 38.0 (C(2)), 42.4 (C(3)), 51.8 (OCH<sub>3</sub>), 61.8 (C(4)), 127.0 (C(3)ArC(6)H), 127.5 (C(3)ArC(2)H), 128.6 (ArC(1)H), 128.7 (2×ArCH), 128.8 (2×ArCH), 128.9 (2×ArCH), 129.1 (2×ArCH), 129.8 (C(3)ArC(5)H), 133.6 (PhC(4)H), 134.0 (PhC(4)H), 134.3 (C(3)ArC(3)Cl), 136.5 (PhC(1)), 136.7 (PhC(1)), 142.6 (C(3)ArC(1)), 171.8 (C(1)), 194.2 (CO), 194.5 (CO); *m/z* (NSI<sup>+</sup>) 421 ([M+H]<sup>+</sup>, 100%); HRMS (NSI<sup>+</sup>) C<sub>25</sub>H<sub>21</sub>ClO<sub>4</sub> ([M+H]<sup>+</sup>) requires 421.1202, found 421.1201 (+0.2 ppm).

**(3S)-Methyl 4-benzoyl-3-(2-chlorophenyl)-5-oxo-5-phenylpentanoate (14)**

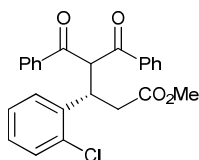

The title compound was prepared according to *General Procedure D* from (*E*)-3-(2-chlorophenyl)acrylic anhydride (87 mg, 0.25 mmol), 1,3-diphenylpropane-1,3-dione (40 mg, 0.18 mmol), HBTM 2.1 (2.8 mg, 0.009 mmol) and BEMP (2.0 mmol/g loading) (90 mg, 0.20 mmol) in CH<sub>2</sub>Cl<sub>2</sub> (0.25 mL) and purified by chromatography (CH<sub>2</sub>Cl<sub>2</sub>→2% EtOAc/CH<sub>2</sub>Cl<sub>2</sub>) gave the *ester* **14** as a yellow solid (53 mg, 69%); mp 93-96 °C;  $[\alpha]_D^{22} -46.8$  (*c* 1.3 in CH<sub>2</sub>Cl<sub>2</sub>); chiral HPLC analysis, ChiralPak AD-H (10% *i*-PrOH:hexane, flow rate 1.0 mL min<sup>-1</sup>, 254 nm, 30 °C), *t*<sub>R</sub> major: 10.8 min, *t*<sub>R</sub>

minor: 14.1 min, 93% ee;  $\nu_{\max}$  (film)/ $\text{cm}^{-1}$  2924 (C-H), 2361 (C-H), 1734 (C=O), 1686 (C=O), 1651 (C=O), 1258 (C-O);  $\delta_{\text{H}}$  (400 MHz,  $\text{CDCl}_3$ ) 2.90-3.09 (2H, m, C(2) $H_2$ ), 3.50 (3H, s,  $\text{OCH}_3$ ), 4.79 (1H, q,  $J$  7.8, C(3) $H$ ), 6.08 (1H, d,  $J$  7.8, C(4) $H$ ), 7.04 (2H, pd,  $J$  7.3, 1.8, Ar $H$ ), 7.22-7.31 (2H, m, Ar $H$ ), 7.36 (4H, dt,  $J$  13.4, 7.7, Ph $H$ ), 7.43-7.58 (2H, m, Ph $H$ ), 7.79-7.93 (4H, m, Ph $H$ );  $\delta_{\text{C}}$  (100 MHz,  $\text{CDCl}_3$ ) 35.8 (C(2)), 39.1 (C(3)), 51.7 ( $\text{OCH}_3$ ), 59.1 (C(4)), 126.9 (C(3)ArC(5) $H$ ), 128.4 (ArCH), 128.7 (2 $\times$ ArCH), 128.8 (2 $\times$ ArCH), 128.9 (2 $\times$ ArCH), 128.9 (2 $\times$ ArCH), 130.2 (ArCH), 133.4 (PhC(4) $H$ ), 133.8 (PhC(4) $H$ ), 134.0 (CCl), 136.4 (PhC(1)), 136.9 (PhC(1)), 137.8 (C(3)ArC(1)), 172.1 (C(1)), 194.4 (CO), 195.1 (CO);  $m/z$  (NSI $^+$ ) 421 ([M+H] $^+$ , 100%); HRMS (NSI $^+$ )  $\text{C}_{25}\text{H}_{21}\text{ClO}_4$  ([M+H] $^+$ ) requires 421.1203, found 421.1201 (+0.4 ppm).

### (3S)-Methyl 4-benzoyl-3-methyl-5-oxo-5-phenylpentanoate (15)

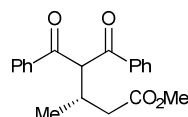

The title compound was prepared according to a *General Procedure D* from (*E*)-crotonic anhydride (39 mg, 0.25 mmol), 1,3-diphenyl-1,3-propanedione (40 mg, 0.18 mmol), HBTM 2.1 (2.8 mg, 0.009 mmol) and BEMP (2.0 mmol/g loading) (90 mg, 0.20 mmol) in  $\text{CH}_2\text{Cl}_2$  (0.25 mL) and purified by chromatography ( $\text{CH}_2\text{Cl}_2 \rightarrow 2\% \text{EtOAc}/\text{CH}_2\text{Cl}_2$ ) to afford the *ester* **15** as a colourless oil (39 mg, 67%);  $[\alpha]_{\text{D}}^{22} +31.8$  ( $c$  1.25 in  $\text{CH}_2\text{Cl}_2$ ); chiral HPLC analysis, ChiralPak AD-H (5% *i*-PrOH:hexane, flow rate 0.5 mL  $\text{min}^{-1}$ , 220 nm, 30 °C),  $t_{\text{R}}$  major: 35.0 min,  $t_{\text{R}}$  minor: 38.7 min, 70% ee; compound data as below.

The reaction was repeated using a modified *General Procedure D* at a lower temperature from (*E*)-crotonic anhydride (39 mg, 0.25 mmol), 1,3-diphenyl-1,3-propanedione (40 mg, 0.18 mmol), HBTM 2.1 (2.8 mg, 0.009 mmol) and BEMP (2.0 mmol/g loading) (90 mg, 0.20 mmol) in  $\text{CH}_2\text{Cl}_2$  (0.25 mL), the reaction was carried out at  $-78$  °C and purified by chromatography ( $\text{CH}_2\text{Cl}_2 \rightarrow 2\% \text{EtOAc}/\text{CH}_2\text{Cl}_2$ ) to afford the *ester* **15** as a colourless oil (24 mg, 41%);  $[\alpha]_{\text{D}}^{22} +32.7$  ( $c$  0.9 in  $\text{CH}_2\text{Cl}_2$ ); chiral HPLC analysis, ChiralPak AD-H (5% *i*-PrOH:hexane, flow rate 0.5 mL  $\text{min}^{-1}$ , 220 nm, 30 °C),  $t_{\text{R}}$  major: 35.0 min,  $t_{\text{R}}$  minor: 38.7 min, 85% ee;  $\nu_{\max}$  (film)/ $\text{cm}^{-1}$  2974 (C-H), 2953 (C-H), 2924 (C-H), 1724 (C=O), 1686 (C=O), 1670 (C=O), 1593 (O- $\text{CH}_3$ );  $\delta_{\text{H}}$  (300 MHz,  $\text{CDCl}_3$ ) 1.09 (3H, d,  $J$  7.0, CH( $\text{CH}_3$ )), 2.38-2.68 (2H, m, C(2) $H_2$ ), 3.00-3.20 (1H, m, C(3) $H$ ), 3.65 (3H, s,  $\text{OCH}_3$ ), 5.66 (1H, d,  $J$  8.0, C(4) $H$ ), 7.37-7.62 (6H, m, Ar $H$ ), 7.95-8.06 (4H, m, Ar $H$ );  $\delta_{\text{C}}$  (100 MHz,  $\text{CDCl}_3$ ) 17.8 (CH( $\text{CH}_3$ )), 31.5 (C(3)), 38.6 (C(2)), 51.7 ( $\text{OCH}_3$ ), 60.0 (C(4)), 128.8 (2 $\times$ ArCH), 128.8 (2 $\times$ ArCH), 129.0 (2 $\times$ ArCH), 129.0 (2 $\times$ ArCH), 133.7 (2 $\times$ ArC), 136.6 (ArC), 137.0 (ArC), 173.2 (C(1)), 195.6 (CO), 195.8 (CO);  $m/z$

(NSI<sup>+</sup>) 325 ([M+H]<sup>+</sup>, 100%), 342 ([M+NH<sub>4</sub>]<sup>+</sup>, 35%); HRMS (NSI<sup>+</sup>) C<sub>20</sub>H<sub>21</sub>O<sub>4</sub> ([M+H]<sup>+</sup>) requires 325.1434, found 325.1440 (+1.7 ppm).

**(3S)-Methyl 3-(1,3-dioxo-1,3-diphenylpropan-2-yl)hexanoate (16)**

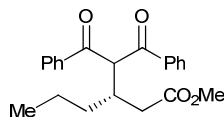

The title compound was prepared according to *General Procedure D* from (*E*)-hexenoic anhydride (53 mg, 0.25 mmol), 1,3-diphenyl-1,3-propanedione (40 mg, 0.18 mmol), HBTM 2.1 (2.8 mg, 0.009 mmol) and BEMP (2.0 mmol/g loading) (90 mg, 0.20 mmol) in CH<sub>2</sub>Cl<sub>2</sub> (0.25 mL) and purified by chromatography (CH<sub>2</sub>Cl<sub>2</sub>→2%EtOAc/CH<sub>2</sub>Cl<sub>2</sub>) to afford the *ester 16* as a colourless oil (36 mg, 57%); [α]<sub>D</sub><sup>22</sup> 0.2 (*c* 1.0 in CHCl<sub>3</sub>); chiral HPLC analysis, ChiralPak AD-H (5% *i*-PrOH:hexane, flow rate 0.5 mL min<sup>-1</sup>, 220 nm, 30 °C), t<sub>R</sub> major: 29.5 min, t<sub>R</sub> minor: 32.8 min, 80% ee; compound data as below.

The reaction was repeated using a modified *General Procedure D* at a lower temperature from (*E*)-hexenoic anhydride (53 mg, 0.25 mmol), 1,3-diphenyl-1,3-propanedione (40 mg, 0.18 mmol), HBTM 2.1 (2.8 mg, 0.009 mmol) and BEMP (2.0 mmol/g loading) (90 mg, 0.20 mmol) in CH<sub>2</sub>Cl<sub>2</sub> (0.25 mL) at -78 °C and purified by chromatography (CH<sub>2</sub>Cl<sub>2</sub>→2%EtOAc/CH<sub>2</sub>Cl<sub>2</sub>) to afford the *ester 16* as a colourless oil (22 mg, 35%); [α]<sub>D</sub><sup>22</sup> +45.8 (*c* 0.5 in CHCl<sub>3</sub>); chiral HPLC analysis, ChiralPak AD-H (5% *i*-PrOH:hexane, flow rate 0.5 mL min<sup>-1</sup>, 220 nm, 30 °C), t<sub>R</sub> major: 29.5 min, t<sub>R</sub> minor: 32.8 min, 93% ee; ν<sub>max</sub> (film)/cm<sup>-1</sup> 2957 (C-H), 2932 (C-H), 2872 (C-H), 1730 (C=O), 1694 (C=O), 1668 (C=O), 1595 (O-CH<sub>3</sub>); δ<sub>H</sub> (400 MHz, CDCl<sub>3</sub>) 0.81 (3H, t, *J* 7.1, C(6)H<sub>3</sub>), 1.16-1.31 (1H, m, C(4)H<sub>2</sub>), 1.33-1.45 (2H, m, C(5)H<sub>2</sub>), 1.49-1.63 (1H, m, C(4)H<sub>2</sub>), 2.47-2.72 (2H, m, C(2)H<sub>2</sub>), 2.84-3.00 (1H, m, C(3)H), 3.62 (3H, s, OCH<sub>3</sub>), 5.87 (1H, d, *J* 7.2, CH(COPh)<sub>2</sub>), 7.35-7.63 (6H, m, ArH), 8.00 (4H, dt, *J* 8.6, 1.4, ArH); δ<sub>C</sub> (100 MHz, CDCl<sub>3</sub>) 14.1 (C(6)), 20.8 (C(5)), 33.5 (C(4)), 35.2 (C(2)<sub>3</sub>), 36.3 (C(3))CH, 51.6 (OCH<sub>3</sub>), 58.4 (CH(COPh)<sub>2</sub>), 128.8 (2×ArCH), 128.8 (2×ArCH), 129.0 (2×ArCH), 129.0 (2×ArCH), 133.6 (ArCH), 133.6 (ArCH), 136.8 (ArC), 137.0 (ArC), 173.7 (C(1)), 195.9 (CO), 196.2 (CO); *m/z* (NSI<sup>+</sup>) 353 ([M+H]<sup>+</sup>, 100%); HRMS (NSI<sup>+</sup>) C<sub>22</sub>H<sub>25</sub>O<sub>4</sub> ([M+H]<sup>+</sup>) requires 353.1747, found 353.1753 (+1.6 ppm).

**(3S)-Methyl 4-acetyl-5-oxo-3-phenylhexanoate (S16)**

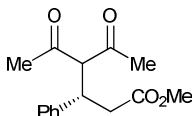

The title compound was prepared according to *General Procedure D* from (*E*)-cinnamic anhydride (70 mg, 0.25 mmol), pentane-2,4-dione (19  $\mu$ L, 0.18 mmol), HBTM 2.1 (2.8 mg, 0.009 mmol) and BEMP (2.0 mmol/g loading) (90 mg, 0.20 mmol) in  $\text{CH}_2\text{Cl}_2$  (0.25 mL) and purified by chromatography ( $\text{CH}_2\text{Cl}_2 \rightarrow 2\% \text{EtOAc}/\text{CH}_2\text{Cl}_2$ ) to afford the *ester S16* as a white solid (30 mg, 64%); mp 68-72  $^\circ\text{C}$ ;  $[\alpha]_{\text{D}}^{22} +57.3$  ( $c$  1.0 in  $\text{CHCl}_3$ ); chiral HPLC analysis, ChiralPak OJ-H (20% *i*-PrOH:hexane, flow rate 1.0 mL  $\text{min}^{-1}$ , 254 nm, 30  $^\circ\text{C}$ ),  $t_{\text{R}}$  major: 20.9 min,  $t_{\text{R}}$  minor: 34.2 min, 37% ee;  $\nu_{\text{max}}$  (film)/ $\text{cm}^{-1}$  1722, 1686, 1356, 1146;  $\delta_{\text{H}}$  (400 MHz,  $\text{CDCl}_3$ ) 1.85 (3H, d,  $J$  0.4,  $\text{CH}_3$ ), 2.27 (3H, d,  $J$  0.4,  $\text{CH}_3$ ), 2.58 (2H, dd,  $J$  7.2, 6.6,  $\text{C}(2)\text{H}_2$ ), 3.52 (3H, s,  $\text{OCH}_3$ ), 3.97 (1H, ddd,  $J$  11.6, 7.2, 6.6,  $\text{C}(3)\text{H}$ ), 4.26 (1H, d,  $J$  11.6,  $\text{C}(4)\text{H}$ ), 7.18-7.24 (3H, m,  $\text{ArH}$ ), 7.26-7.31 (2H, m,  $\text{ArH}$ );  $\delta_{\text{C}}$  (100 MHz,  $\text{CDCl}_3$ ) 29.7 ( $\text{CH}_3$ ), 30.0 ( $\text{CH}_3$ ), 39.3 ( $\text{C}(2)$ ), 41.7 ( $\text{C}(3)$ ), 51.8 ( $\text{OCH}_3$ ), 74.2 ( $\text{C}(4)$ ), 127.6 ( $\text{C}(3)\text{ArC}(4)\text{H}$ ), 128.1 ( $2 \times \text{ArCH}$ ), 129.0 ( $2 \times \text{ArCH}$ ), 139.9 ( $\text{C}(3)\text{ArC}(1)$ ), 171.6 ( $\text{C}(1)$ ), 202.8 ( $\text{CO}$ ), 203.0 ( $\text{CO}$ );  $m/z$  ( $\text{NSI}^+$ ) 263 ( $[\text{M}+\text{H}]^+$ , 100%); HRMS ( $\text{NSI}^+$ )  $\text{C}_{15}\text{H}_{19}\text{O}_4$  ( $[\text{M}+\text{H}]^+$ ) requires 263.1278, found 263.1270 ( $-3.0$  ppm).

**(3S)-Methyl-5-(4-bromophenyl)-4-[(4-bromophenyl)carbonyl]-5-oxo-3-phenylpentanoate (17)**

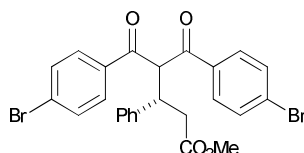

The title compound was prepared according to *General Procedure D* from 1,3-bis(4-bromophenyl)propane-1,3-dione (55 mg, 0.18 mmol) and (*E*)-cinnamic anhydride (70 mg, 0.25 mmol) and purified by chromatography ( $\text{CH}_2\text{Cl}_2 \rightarrow 2\% \text{EtOAc}/\text{CH}_2\text{Cl}_2$ ) to afford the *ester 17* as a white solid (65 mg, 66%); mp 172-173  $^\circ\text{C}$ ;  $[\alpha]_{\text{D}}^{22} +9.2$  ( $c$  0.9 in  $\text{CHCl}_3$ ); Chiral HPLC analysis; Chiralcel AD-H (20% *i*-PrOH:hexane, flow rate 1.0 mL  $\text{min}^{-1}$ , 254 nm, 30  $^\circ\text{C}$ )  $t_{\text{R}}$  major (3*S*): 13.8 min,  $t_{\text{R}}$  minor (3*R*): 18.3 min, 92% ee;  $\nu_{\text{max}}$  (film) 1734 ( $\text{C}=\text{O}$ , ester), 1701 ( $\text{C}=\text{O}$ ), 1664 ( $\text{C}=\text{O}$ ), 1259 ( $\text{CH}_3\text{-O}$ );  $\delta_{\text{H}}$  (400 MHz,  $\text{CDCl}_3$ ) 2.80 (1H, dd,  $J$  15.7, 9.0, (2)*H*), 2.87 (1H, dd,  $J$  15.7, 4.8, (2)*H*), 3.52 (3H, s,  $\text{CO}_2\text{CH}_3$ ), 4.37 (1H, td,  $J$  9.3, 4.8,  $\text{C}(3)\text{HPh}$ ), 5.74 (1H, d,  $J$  9.7,  $\text{C}(4)\text{H}$ ), 7.28-6.82 (5H, m,  $5 \times \text{Ar}(3)\text{H}$ ), 7.46 (2H, d,  $J$  8.6,  $\text{Ar}(4,2)\text{H}$ ), 7.58 (4H, dd,  $J$  9.4, 8.6,  $\text{Ar}(4,2)\text{H}$ ), 7.84 (2H, d,  $J$  8.6 Hz,  $\text{ArH}$ );  $\delta_{\text{C}}$  (100 MHz,  $\text{CDCl}_3$ ) 38.0 ( $\text{C}(2)$ ), 42.6 ( $\text{C}(3)$ ), 51.7 ( $\text{CO}_2\text{CH}_3$ ), 62.5 ( $\text{C}(4)$ ), 127.3, 128.3, 128.6, 128.8 ( $\text{C}(5)\text{ArC}$ ), 129.3 ( $\text{C}(5)\text{ArC}$ ), 130.0 ( $\text{C}(5)\text{ArCH}$ ), 130.3 ( $\text{C}(5)\text{ArCH}$ ), 131.9 ( $\text{C}(5)\text{ArCH}$ ), 132.2 ( $\text{C}(5)\text{ArCH}$ ), 135.1

(C(5)ArC), 135.2 (C(5)ArC), 139.8 (C(3)ArC(1)), 171.9 (C(1)), 193.3 (C(5)), 193.5 (C(5)); HRMS (ESI+)  $C_{25}H_{21}^{79}Br_2O_4$  ( $[M+H]^+$ ), found 542.9800, requires 542.9801 (-0.5 ppm).

**(3S)-Methyl-5-(4-methylphenyl)-4-[(4-methylphenyl)carbonyl]-5-oxo-3-phenylpentanoate (18)**

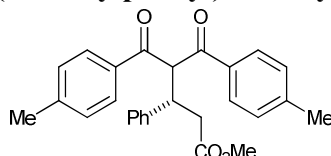

The title compound was prepared according to *General Procedure D* from 1,3-bis(4-methylphenyl)propane-1,3-dione (55 mg, 0.18 mmol) and (*E*)-cinnamic anhydride (70 mg, 0.25 mmol) and purified by chromatography ( $CH_2Cl_2 \rightarrow 2\% EtOAc/CH_2Cl_2$ ) to afford the *ester* **18** as an off-white solid (30 mg, 40%); mp 142-143 °C;  $[\alpha]_D^{22} -3.6$  (*c* 0.65 in  $CHCl_3$ ); chiral HPLC analysis; Chiralcel AD-H (20% *i*-PrOH:hexane, flow rate 1.0 mL min<sup>-1</sup>, 254 nm, 30 °C)  $t_R$  major (*3S*): 16.9 min,  $t_R$  minor (*3R*): 23.6 min, 90% ee;  $\nu_{max}$  (film) 2970 (C-H), 1736 (C=O, ester), 1693 (C=O), 1654 (C=O);  $\delta_H$  (400 MHz,  $CDCl_3$ ) 2.32 (3H, s, ArCH<sub>3</sub>), 2.38 (3H, s, ArCH<sub>3</sub>), 2.83 (1H, dd, *J* 15.7, 9.6, C(2)H), 2.88 (1H, dd, *J* 15.7, 4.7, C(2)H), 3.49 (3H, s, CO<sub>2</sub>CH<sub>3</sub>), 4.40 (1H, td, *J* 9.6, 4.7, C(3)H), 5.77 (1H, d, *J* 9.6, C(4)H), 7.35-7.03 (9H, m, 5×Ar(3)H, and 4×C(5)Ar(3)H), 7.68 (2H, d, *J* 8.3, C(5)Ar(2)H), 7.90 (2H, d, *J* 8.3, C(5)Ar(2)H);  $\delta_C$  (100 MHz,  $CDCl_3$ ) 21.6 (ArCH<sub>3</sub>), 21.6 (ArCH<sub>3</sub>), 38.2 (C(2)H<sub>2</sub>), 42.6 (C(3)H), 51.5 (CO<sub>2</sub>CH<sub>3</sub>), 62.1 (C(4)H), 127.0 (C(3)ArC(4)H), 128.3 (4×C(3)ArC(2,3)H), 128.7 (2×C(5)ArC(3)), 129.0 (2×C(5)ArC(3')), 129.2 (2×C(5)ArC(2)), 129.5 (2×C(5)ArC(2')), 134.1 (C(5)ArC(1)), 134.3 (C(5)ArC(1')), 140.5 (C(3)ArC(1)), 144.1 (C(5)ArC(4)), 144.7 (C(5)ArC(4')), 172.0 (C(1)), 193.8 (CO), 194.3 (CO); *m/z* (ESI+) 302 ( $[M+H]^+$ , 100%); HRMS (ESI+)  $C_{27}H_{27}O_4$  ( $[M+H]^+$ ), found 415.1906, requires 415.1904 (+0.5 ppm).

**(3S)-Methyl-5-(4-methylphenyl)-4-[(4-methylphenyl)carbonyl]-5-oxo-3-[4-(trifluoromethyl)phenyl]pentanoate (19)**

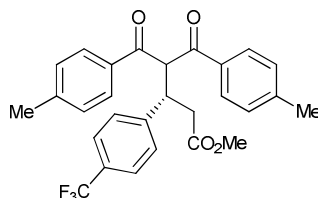

The title compound was prepared according to *General Procedure D* from (*E*)-3-(4-(Trifluoromethyl)phenyl)acrylic anhydride (104 mg, 0.25 mmol), 1,3-bis(4-Methylphenyl)propane-1,3-dione (45 mg, 0.18 mmol), HBTM 2.1 (2.8 mg, 0.009 mmol) and BEMP (2.0 mmol/g loading) (90 mg,

0.20 mmol) in CH<sub>2</sub>Cl<sub>2</sub> (0.25 mL) and purified by chromatography (CH<sub>2</sub>Cl<sub>2</sub>→2%EtOAc/CH<sub>2</sub>Cl<sub>2</sub>) to afford the *ester* **19** as an off-white solid (47 mg, 54%); mp 120-123 °C; [ $\alpha$ ]<sub>D</sub><sup>22</sup> -23.2 (*c* 1.1 in CHCl<sub>3</sub>); chiral HPLC analysis, ChiralPak AD-H (20% *i*-PrOH:hexane, flow rate 1.0 mL min<sup>-1</sup>, 220 nm, 30 °C), *t*<sub>R</sub> major: 14.1 min, *t*<sub>R</sub> minor: 20.1 min, 97% ee;  $\nu_{\max}$  (film)/cm<sup>-1</sup> 2954 (C-H), 1730 (C=O), 1686 (C=O), 1605 (C=C), 1110 (C-F);  $\delta_{\text{H}}$  (500 MHz, CDCl<sub>3</sub>) 2.32 (3H, s, PhCH<sub>3</sub>), 2.38 (3H, s, PhCH<sub>3</sub>), 2.74-2.96 (2H, m, C(2)H<sub>2</sub>), 3.50 (3H, s, OCH<sub>3</sub>), 4.45 (1H, td, *J* 9.6, 4.4, C(3)H), 5.77 (1H, d, *J* 9.6, C(4)H), 7.11 (2H, d, *J* 8.0, tolylC(2)H), 7.22 (2H, d, *J* 8.0, tolylC(2)H), 7.40 (4H, q, *J* 8.3, C(3)ArH), 7.67 (2H, d, *J* 8.1, tolylC(3)H), 7.90 (2H, d, *J* 8.1, tolylC(3)H);  $\delta_{\text{C}}$  (125 MHz, CDCl<sub>3</sub>) 21.7 (ArCH<sub>3</sub>), 21.8 (ArCH<sub>3</sub>), 37.9 (C(2)H<sub>2</sub>), 42.5 (C(3)H), 51.8 (OCH<sub>3</sub>), 61.8 (C(4)H), 124.1 (q, <sup>1</sup>*J*<sub>CF</sub> 272.0, CF<sub>3</sub>), 125.4 (q, <sup>3</sup>*J*<sub>CF</sub> 3.6, 2×C(3)ArC(3)), 128.8 (2×ArCH), 129.0 (2×ArCH), 129.1 (2×ArCH), 129.5 (2×ArCH), 129.8 (2×ArCH), 134.0 (C(5)ArC(1)), 134.2 (C(5)ArC(1)), 144.7 (C(3)ArC(1)), 145.0 (C(5)ArC(4)), 145.1 (C(5)ArC(4)), 171.8 (OCH<sub>3</sub>), 193.7 (CO), 194.1 (CO);  $\delta_{\text{F}}$  (282 MHz, CDCl<sub>3</sub>) -63.10; *m/z* (NSI<sup>+</sup>) 483 ([M+H]<sup>+</sup>, 100%), 500 ([M+NH<sub>4</sub>]<sup>+</sup>, 30%); HRMS (NSI<sup>+</sup>) C<sub>28</sub>H<sub>26</sub>F<sub>3</sub>O<sub>4</sub> ([M+H]<sup>+</sup>) requires 483.1778, found 483.1775 (+0.8 ppm).

**(3S)-Methyl-5-(furan-2-yl)-4-[(furan-2-yl)carbonyl]-5-oxo-3-phenylpentanoate (20)**

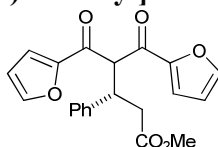

The title compound was prepared according to *General Procedure D* from 1,3-bis(furan-2-yl)propane-1,3-dione (37 mg, 0.18 mmol) and (*E*)-cinnamic anhydride (70 mg, 0.25 mmol) and purified by chromatography (CH<sub>2</sub>Cl<sub>2</sub>→2%EtOAc/CH<sub>2</sub>Cl<sub>2</sub>) to afford the *ester* **20** as a pale yellow solid (61 mg, 93%); mp 131-133 °C; [ $\alpha$ ]<sub>D</sub><sup>22</sup> +21.1 (*c* 1.65 in CHCl<sub>3</sub>); chiral HPLC analysis; Chiralcel AD-H (20% *i*-PrOH:hexane, flow rate 1.0 mL min<sup>-1</sup>, 254 nm, 30 °C) *t*<sub>R</sub> major (*3S*): 14.1 min, *t*<sub>R</sub> minor (*3R*): 21.1 min, 90% ee;  $\nu_{\max}$  (film) 1732 (C=O, ester), 1674 (C=O), 1645 (C=O);  $\delta_{\text{H}}$  (400 MHz, CDCl<sub>3</sub>) 2.86-2.82 (2H, m, C(2)H), 3.49 (3H, s, CO<sub>2</sub>CH<sub>3</sub>), 4.38 (1H, td, *J* 9.8, 4.7, C(3)H), 5.50 (1H, dd, *J* 10.4, 0.9, C(4)H), 6.42 (1H, ddd, *J* 3.7, 1.7, 0.9 Hz, furanyl(4)H), 6.54 (1H, ddd, 3.7, 1.7, 1.0, furanyl(4)H), 7.20-7.07 (4H, m, C(3)Ar(2,3)H), 7.27-7.25 (2H, m, C(3)Ar(4)H and furanyl(3)H), 7.37 (1H, dt, *J* 3.6, 0.9, furanyl(3)H), 7.50-7.49 (1H, m, furanyl(5)H), 7.60-7.59 (1H, m, furanyl(5)H);  $\delta_{\text{C}}$  (100 MHz, CDCl<sub>3</sub>) 38.4 (C(2)), 41.8 (C(3)), 51.5 (CO<sub>2</sub>CH<sub>3</sub>), 62.0 (C(4)), 112.7 (furanylC(4)), 112.8 (furanylC(4)), 118.7 (furanylC(3)), 119.3 (furanylC(3)), 127.1 (C(3)Ar(4)H), 128.2 (2×C(3)Ar(2)CH), 128.3 (2×C(3)Ar(3)CH), 139.8 (C(3)ArC(1)), 146.8 (furanylC(5)), 147.4 (furanylC(5)), 151.9 (furanylC(2)),

152.1 (furanylC(2)), 171.6 (C(1)), 181.9 (CO), 182.0 (CO);  $m/z$  (ESI+) 367 ([M+H]<sup>+</sup>, 100%); HRMS (ESI+) C<sub>21</sub>H<sub>19</sub>O<sub>6</sub> ([M+H]<sup>+</sup>), found 367.1175, requires 367.1176 (−0.3 ppm).

**(3S)-Methyl-5-(furan-2-yl)-4-[(furan-2-yl)carbonyl]-5-oxo-3-[4-(trifluoromethyl)phenyl]pentanoate (21)**

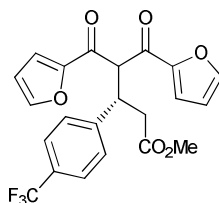

The title compound was prepared according to *General Procedure D* from (*E*)-3-(4-(Trifluoromethyl)phenyl)acrylic anhydride (104 mg, 0.25 mmol), 1,3-bis(furan-2-yl)propane-1,3-dione (37 mg, 0.18 mmol), HBTM 2.1 (2.8 mg, 0.009 mmol) and BEMP (2.0 mmol/g loading) (90 mg, 0.20 mmol) in CH<sub>2</sub>Cl<sub>2</sub> (0.25 mL) and purified by chromatography (CH<sub>2</sub>Cl<sub>2</sub>→2%EtOAc/CH<sub>2</sub>Cl<sub>2</sub>) gave **21** as a yellow solid (71 mg, 91%); mp 151-154 °C;  $[\alpha]_D^{22}$  −10.8 (*c* 1.0 in CH<sub>2</sub>Cl); chiral HPLC analysis, ChiralPak AD-H (20% *i*-PrOH:hexane, flow rate 1.0 mL min<sup>−1</sup>, 254 nm, 30 °C),  $t_R$  major: 12.7 min,  $t_R$  minor: 21.4 min, 94% ee;  $\nu_{\max}$  (film)/cm<sup>−1</sup> 2974 (C-H), 2926 (C-H), 1734 (C=O), 1670 (C=O), 1458 (furan), 1113 (C-F);  $\delta_H$  (500 MHz, CDCl<sub>3</sub>) 2.81 (2H, qd, *J* 15.9, 7.2, C(2)H<sub>2</sub>), 3.49 (3H, s, OCH<sub>3</sub>), 4.40 (1H, td, *J* 10.0, 4.5, C(3)H), 5.50 (1H, d, *J* 10.3, C(4)H), 6.43 (1H, dd, *J* 3.5, 1.5, furanyl(4)H), 6.55 (1H, dd, *J* 3.5, 1.5, furanyl(4)H), 7.12 (1H, d, *J* 3.5, furanyl(3)H), 7.34-7.46 (5H, m, 4×ArH and furanyl(3)H), 7.50 (1H, s, furanyl(5)H), 7.59 (1H, s, furanyl(4)H);  $\delta_C$  (125 MHz, CDCl<sub>3</sub>) 38.1 (C(2)H<sub>2</sub>), 41.6 (OCH<sub>3</sub>), 51.8 (C(3)H), 61.6 (C(4)H), 113.0 (furanylC(4)H), 113.1 (furanylC(4)H), 119.1 (furanylC(3)H), 119.6 (furanylC(3)H), 124.1 (q, <sup>1</sup>*J*<sub>CF</sub> 272.0, CF<sub>3</sub>), 125.4 (d, <sup>3</sup>*J*<sub>CF</sub> 3.6, 2×C(3)ArC(3)H), 128.8 (2×C(3)ArC(2)H), 129.4 (q, <sup>2</sup>*J*<sub>CF</sub> 32.4, ArC(4)CF<sub>3</sub>), 144.3 (ArC(1)), 147.2 (furanylC(5)H), 147.7 (furanylC(5)H), 151.9 (furanylC(2)), 152.2 (furanylC(2)), 171.4 (C(1)), 181.8 (CO), 181.8 (CO);  $\delta_F$  (282 MHz, CDCl<sub>3</sub>) −63.12;  $m/z$  (NSI<sup>+</sup>) 435 ([M+H]<sup>+</sup>, 100%), 452 ([M+NH<sub>4</sub>]<sup>+</sup>, 70%); HRMS (NSI<sup>+</sup>) C<sub>22</sub>H<sub>18</sub>F<sub>3</sub>O<sub>6</sub> ([M+H]<sup>+</sup>) requires 435.1050, found 435.1052 (+0.5 ppm).

**(3R)-Methyl 4-benzoyl-5-oxo-3,5-diphenylpentanoate (6)**

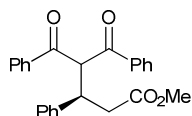

The title compound was prepared according to *General Procedure D* from (*Z*)-cinnamic anhydride (70 mg, 0.25 mmol), 1,3-diphenyl-1,3-propanedione (40 mg, 0.18 mmol), HBTM 2.1 (2.8 mg, 0.009 mmol) and BEMP (2.0 mmol/g loading) (90 mg, 0.20 mmol) in CH<sub>2</sub>Cl<sub>2</sub> (0.25 mL) and purified by chromatography (CH<sub>2</sub>Cl<sub>2</sub>→2%EtOAc/CH<sub>2</sub>Cl<sub>2</sub>) gave **21** as a yellow solid (28 mg, 41%); [ $\alpha$ ]<sub>D</sub><sup>22</sup> -12.4 (*c* 0.5 in CH<sub>2</sub>Cl<sub>2</sub>); chiral HPLC analysis, ChiralPak AD-H (20% *i*-PrOH:hexane, flow rate 1.0 mL min<sup>-1</sup>, 254 nm, 30 °C), *t*<sub>R</sub> minor: 11.8 min, *t*<sub>R</sub> major: 17.0 min, 30% ee. Data in agreement to that reported on page S12

**General Procedure E: Lactone formation**

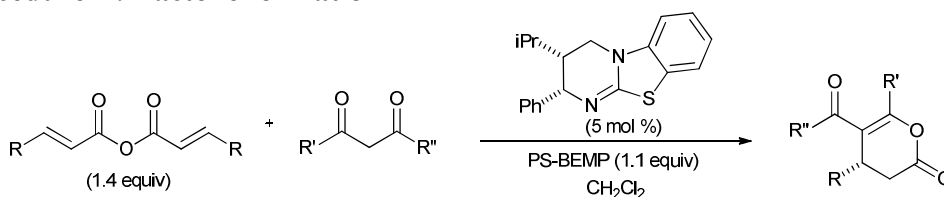

To a solution of the corresponding homoanhydride (1.4 equiv) in dry CH<sub>2</sub>Cl<sub>2</sub> (0.72 mM) under argon, was added dicarbonyl (1.0 equiv), isothiurea (HBTM 2.1, 0.05 equiv) and polymer-bound 2-*tert*-butylimino-2-diethylamino-1,3-dimethylperhydro-1,3,2-diazaphosphorine (BEMP) (1.1 equiv) at 0 °C. The reaction mixture was stirred and gradually warmed to room temperature over 5 h. The solvent was removed *in vacuo* and the residue was purified by column chromatography on silica gel (CH<sub>2</sub>Cl<sub>2</sub>) to afford the *lactones* **2**, **S16**, **S19-S20**, **24-29**.

**(R)-5-Benzoyl-6-methyl-4-phenyl-3,4-dihydro-2H-pyran-2-one, (R)-5-Acetyl-4,6-diphenyl-3,4-dihydro-2H-pyran-2-one (24, 25)**

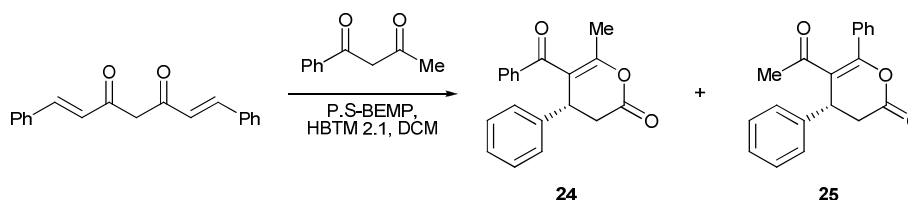

The title compound was prepared according to *General Procedure E* from (*E*)-cinnamic anhydride (70 mg, 0.25 mmol), 1-phenylbutane-1,3-dione (29 mg, 0.18 mmol), HBTM 2.1 (2.8 mg, 0.009 mmol) and BEMP (2.0 mmol/g loading) (90 mg, 0.20 mmol) in CH<sub>2</sub>Cl<sub>2</sub> (0.25 mL). Chromatographic purification



of the residue (CH<sub>2</sub>Cl<sub>2</sub>) gave **24** as a white solid (15 mg, 29% in 96:4 rr), **25** as a white solid (2 mg, 4% in 3:96 rr) and a mixture of **24** and **25** (29 mg, 55% in 34:66 rr).

**24**: mp 80-84 °C;  $[\alpha]_{\text{D}}^{22} -19.6$  (*c* 1.0 in CHCl<sub>3</sub>); {Lit.<sup>10</sup>  $[\alpha]_{\text{D}}^{22} -26.7$  (*c* 1.0 in CHCl<sub>3</sub>) 96% ee}; chiral HPLC analysis, ChiralPak OD-H (15% *i*-PrOH:hexane, flow rate 1.0 mL min<sup>-1</sup>, 254 nm, 20 °C), *t*<sub>R</sub> major: 15.4 min, *t*<sub>R</sub> minor: 18.9 min, 70% ee; δ<sub>H</sub> (300 MHz, CDCl<sub>3</sub>) 1.91 (3H, d, *J* 0.9, CH<sub>3</sub>), 2.95 (1H, dd, *J* 15.9, 3.6, CH<sub>2</sub>), 3.08 (1H, dd, *J* 15.9, 7.5, CH<sub>2</sub>), 4.32-4.36 (1H, m, CH), 7.14-7.65 (10H, m, ArH). Representative data for **25**:  $[\alpha]_{\text{D}}^{22} -94.0$  (*c* 0.15 in CHCl<sub>3</sub>); chiral HPLC analysis, ChiralPak AS-H (15% *i*-PrOH:hexane, flow rate 1.0 mL min<sup>-1</sup>, 254 nm, 30 °C), *t*<sub>R</sub> major: 21.4 min, *t*<sub>R</sub> minor: 30.7 min, 61% ee; δ<sub>H</sub> (500 MHz, CDCl<sub>3</sub>) 1.80 (3H, s, CH<sub>3</sub>), 2.94 (1H, dd, *J* 16.0, 2.0, CH<sub>2</sub>), 3.06 (1H, dd, *J* 16.0, 7.8, CH<sub>2</sub>), 4.48-4.50 (1H, m, CH), 7.21-7.34 (6H, m, ArH), 7.46-7.55 (4H, m, ArH). Data in agreement with the literature.<sup>10</sup>

#### (*R*)-Ethyl 2-oxo-4,6-diphenyl-3,4-dihydro-2*H*-pyran-5-carboxylate (**27**)

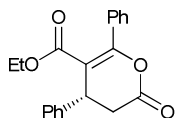

The title compound was prepared according to *General Procedure E* from (*E*)-cinnamic anhydride (70 mg, 0.25 mmol), ethyl 3-oxo-3-phenylpropanoate (31 μL, 0.18 mmol), HBTM 2.1 (2.8 mg, 0.009 mmol) and BEMP (2.0 mmol/g loading) (90 mg, 0.20 mmol) in CH<sub>2</sub>Cl<sub>2</sub> (0.25 mL) and purified by chromatography (CH<sub>2</sub>Cl<sub>2</sub>) to afford the lactone **27** as a yellow gum (35 mg, 60%);  $[\alpha]_{\text{D}}^{22} -67.0$  (*c* 1.0 in CHCl<sub>3</sub>); {Lit.<sup>9</sup>  $[\alpha]_{\text{D}}^{22} -70.0$  (*c* 1.0 in CHCl<sub>3</sub>) 92% ee}; chiral HPLC analysis, ChiralPak AD-H (3% *i*-PrOH:hexane, flow rate 1.0 mL min<sup>-1</sup>, 254 nm, 20 °C), *t*<sub>R</sub> major: 17.3 min, *t*<sub>R</sub> minor: 26.1 min, 94% ee; δ<sub>H</sub> (400 MHz, CDCl<sub>3</sub>) 0.90 (3H, t, *J* 7.2, CH<sub>3</sub>), 2.95 (1H, dd, *J* 15.8, 2.4, C(3)H<sub>2</sub>), 2.98 (1H, dd, *J* 15.8, 7.6, C(3)H<sub>2</sub>), 3.89-4.01 (2H, m, OCH<sub>2</sub>), 4.43 (1H, dd, *J* 7.6, 2.4, C(4)H), 7.26-7.54 (10H, m, ArH). Data in agreement with the literature.<sup>10</sup>

#### (*R*)-Ethyl 2-oxo-6-phenyl-4-(4-(trifluoromethyl)phenyl)-3,4-dihydro-2*H*-pyran-5-carboxylate (**28**)

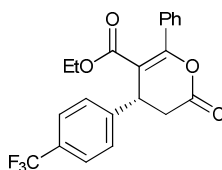

The title compound was prepared according to *General Procedure E* from (*E*)-3-(4-(trifluoromethyl)phenyl)acrylic anhydride (104 mg, 0.25 mmol), ethyl 3-oxo-3-phenylpropanoate (31

$\mu\text{L}$ , 0.18 mmol), HBTM 2.1 (2.8 mg, 0.009 mmol) and BEMP (2.0 mmol/g loading) (90 mg, 0.20 mmol) in  $\text{CH}_2\text{Cl}_2$  (0.25 mL) and purified by chromatography ( $\text{CH}_2\text{Cl}_2$ ) to afford the lactone **28** as a white gum (43 mg, 61%);  $[\alpha]_{\text{D}}^{22}$   $-56.6$  ( $c$  1.0 in  $\text{CHCl}_3$ ); chiral HPLC analysis, ChiralPak AD-H (15%  $i$ -PrOH:hexane, flow rate  $1.0 \text{ mL min}^{-1}$ , 254 nm,  $20^\circ\text{C}$ ),  $t_{\text{R}}$  major: 8.0 min,  $t_{\text{R}}$  minor: 11.0 min, 94% ee;  $\nu_{\text{max}}$  (film)/ $\text{cm}^{-1}$  1782 (C=O), 1694 (C=O), 1323 (C-F);  $\delta_{\text{H}}$  (400 MHz,  $\text{CDCl}_3$ ) 0.88 (3H, t,  $J$  7.2,  $\text{CH}_3$ ), 2.94 (1H, dd,  $J$  16.0, 2.4, C(3) $H_2$ ), 3.15 (1H, dd,  $J$  16.0, 7.6, C(3) $H_2$ ), 3.89-4.00 (2H, m,  $\text{OCH}_2$ ), 4.47 (1H, dd,  $J$  7.6, 2.4, C(4) $H$ ), 7.38-7.53 (7H, m, Ar $H$ ), 7.61 (2H, d,  $J$  8.0, Ar $H$ );  $\delta_{\text{C}}$  (75 MHz,  $\text{CDCl}_3$ ) 13.6 ( $\text{CH}_3$ ), 36.1 (C(3) $H_2$ ), 38.8 (C(4) $H$ ), 61.3 ( $\text{OCH}_2$ ), 111.0 (C(5)), 124.1 (q,  $^1J_{\text{CF}}$  270.1,  $\text{CF}_3$ ), 126.4 (q,  $^3J_{\text{CF}}$  3.8,  $2\times\text{C}(4)\text{ArC}(3)$ ), 127.4 ( $2\times\text{ArCH}$ ), 128.2 ( $2\times\text{ArCH}$ ), 128.8 ( $2\times\text{ArCH}$ ), 130.3 (q,  $^2J_{\text{CF}}$  32.3, C(4)ArC(4)), 130.5 (ArCH), 133.0 (PhC(1)), 144.2 ( $\text{CF}_3\text{PhC}(1)$ ), 159.4 (C(6)), 165.5 (CO), 166.2 (CO);  $\delta_{\text{F}}$  (300 MHz,  $\text{CDCl}_3$ )  $-63.1$ ;  $m/z$  ( $\text{NSI}^+$ ) 423 ( $[\text{M}+\text{CH}_3\text{OH}+\text{H}]^+$ , 100%), 391 ( $[\text{M}+\text{H}]^+$ , 30%); HRMS ( $\text{NSI}^+$ )  $\text{C}_{21}\text{H}_{18}\text{F}_3\text{O}_4$  ( $[\text{M}+\text{H}]^+$ ) requires 391.1152, found 391.1155 (+0.8 ppm).

**(R)-Ethyl 4-(4-fluorophenyl)-2-oxo-6-phenyl-3,4-dihydro-2H-pyran-5-carboxylate (29)**

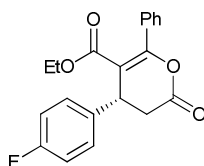

The title compound was prepared according to *General Procedure E* from (*E*)-3-(4-fluorophenyl)acrylic anhydride (314 mg, 1.0 mmol), ethyl 3-oxo-3-phenylpropanoate (124  $\mu\text{L}$ , 0.72 mmol), HBTM 2.1 (11.1 mg, 0.036 mmol) and BEMP (2.0 mmol/g loading) (360 mg, 0.80 mmol) in  $\text{CH}_2\text{Cl}_2$  (1.0 mL) and purified by chromatography ( $\text{CH}_2\text{Cl}_2$ ) to afford the lactone **29** as a pale yellow oil (171 mg, 70%);  $[\alpha]_{\text{D}}^{22}$   $-26.1$  ( $c$  1.0 in  $\text{CH}_2\text{Cl}_2$ ); chiral HPLC analysis, ChiralPak AD-H (10%  $i$ -PrOH:hexane, flow rate  $1.0 \text{ mL min}^{-1}$ , 220 nm,  $30^\circ\text{C}$ ),  $t_{\text{R}}$  major: 9.4 min,  $t_{\text{R}}$  minor: 13.1 min, 89% ee;  $\nu_{\text{max}}$  (film)/ $\text{cm}^{-1}$  2926 (C-H), 1784 (C=O), 1705 (C=O), 1508 (C=C), 1224 (C-F);  $\delta_{\text{H}}$  (300 MHz,  $\text{CDCl}_3$ ) 0.91 (3H, t,  $J$  7.1,  $\text{CH}_3$ ), 2.94 (1H, dd,  $J$  15.8, 2.4, C(3) $H_2$ ), 3.13 (1H, dd,  $J$  15.8, 7.6, C(3) $H_2$ ), 3.97 (2H, qd,  $J$  7.1, 2.2,  $\text{OCH}_2$ ), 4.43 (1H, dd,  $J$  7.6, 2.4, C(4) $H$ ), 6.99-7.12 (2H, m, FPhC(3,5) $H$ ), 7.22-7.28 (2H, m, FPhC(2,6) $H$ ), 7.38-7.58 (5H, m, Ph $H$ );  $\delta_{\text{C}}$  (75 MHz,  $\text{CDCl}_3$ ) 13.6 ( $\text{CH}_3$ ), 36.5 (C(3) $H_2$ ), 38.3 (C(4) $H$ ), 61.2 ( $\text{OCH}_2$ ), 111.7 (C(5)), 116.2 (d,  $^2J_{\text{C-F}}$  21.6,  $2\times\text{C}(4)\text{ArC}(3)\text{H}$ ), 128.2 ( $2\times\text{ArCH}$ ), 128.5 (d,  $^3J_{\text{C-F}}$  8.2,  $2\times\text{C}(4)\text{ArC}(2)\text{H}$ ), 128.8 ( $2\times\text{ArCH}$ ), 130.4 (ArCH), 133.1 (PhC(1)), 135.8 (d,  $^4J_{\text{CF}}$  3.3, C(4)ArC(1)), 158.8 (C(6)), 162.4 (d,  $^1J_{\text{C-F}}$  246.5, CF), 165.9 (CO), 166.4 (CO);  $\delta_{\text{F}}$  (282 MHz,

$\text{CDCl}_3$ )  $-115.1$ ;  $m/z$  (APCI<sup>+</sup>) 341 ( $[\text{M}+\text{H}]^+$ , 100%); HRMS (APCI<sup>+</sup>)  $\text{C}_{20}\text{H}_{18}\text{FO}_4$  ( $[\text{M}+\text{H}]^+$ ) requires 341.1184 found 341.1179 ( $-1.4$  ppm).

**(R)-Ethyl 4-(3-chlorophenyl)-2-oxo-6-phenyl-3,4-dihydro-2H-pyran-5-carboxylate (30)**

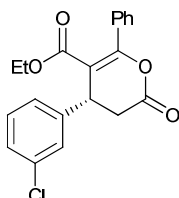

The title compound was prepared according to *General Procedure E* from (*E*)-3-chlorophenyl)acrylic anhydride (347 mg, 1.0 mmol), ethyl 3-oxo-3-phenylpropanoate (124  $\mu\text{L}$ , 0.72 mmol), HBTM 2.1 (11.1 mg, 0.036 mmol) and BEMP (2.0 mmol/g loading) (360 mg, 0.80 mmol) in  $\text{CH}_2\text{Cl}_2$  (1.0 mL) and purified by chromatography ( $\text{CH}_2\text{Cl}_2$ ) to afford the *lactone* **30** as a pale yellow oil (121 mg, 47%);  $[\alpha]_{\text{D}}^{22}$   $-2.1$  ( $c$  0.38 in  $\text{CH}_2\text{Cl}_2$ ); chiral HPLC analysis, ChiralPak AD-H (5% *i*-PrOH:hexane, flow rate 0.5 mL  $\text{min}^{-1}$ , 220 nm, 30 °C),  $t_{\text{R}}$  major: 25.5 min,  $t_{\text{R}}$  minor: 39.1 min, 92% ee;  $\nu_{\text{max}}$  (film)/ $\text{cm}^{-1}$  2980 (C-H), 1732 (C=O), 1708 (C=O), 1597 (C=C), 1066 (C-Cl);  $\delta_{\text{H}}$  (400 MHz,  $\text{CDCl}_3$ ) 0.92 (3H, t,  $J$  7.1,  $\text{CH}_3$ ), 2.96 (1H, dd,  $J$  15.9, 2.4, C(3) $\text{H}_2$ ), 3.14 (1H, dd,  $J$  15.9, 7.7, C(3) $\text{H}_2$ ), 3.98 (2H, qd,  $J$  7.1, 2.0,  $\text{OCH}_2$ ), 4.41 (1H, dd,  $J$  7.7, 2.4, C(4) $\text{H}$ ), 7.17 (1H, dt,  $J$  6.6, 1.9, Ar $\text{H}$ ), 7.25-7.30 (3H, m, Ar $\text{H}$ ), 7.42-7.55 (5H, m, Ar $\text{H}$ );  $\delta_{\text{C}}$  (75 MHz,  $\text{CDCl}_3$ ) 13.6 ( $\text{CH}_3$ ), 36.2 (C(4) $\text{H}$ ), 38.7 (C(3) $\text{H}_2$ ), 61.3 ( $\text{OCH}_2$ ), 111.1 (C(5) $\text{H}$ ), 125.0 (Ar $\text{CH}$ ), 127.3 (Ar $\text{CH}$ ), 128.2 (2 $\times$ Ar $\text{CH}$ ), 128.3 (Ar $\text{CH}$ ), 128.8 (2 $\times$ Ar $\text{CH}$ ), 130.4 (Ar $\text{CH}$ ), 130.7 (Ar $\text{CH}$ ), 133.0 (PhC(1)), 135.1 (C(4)ArC(3)), 142.1 (C(4)ArC(1)), 159.3 (C(6) $\text{H}$ ), 165.7 (CO), 166.3 (CO);  $m/z$  (APCI<sup>+</sup>) 357 ( $[\text{M}+\text{H}]^+$ , 90%); HRMS (NSI<sup>+</sup>)  $\text{C}_{20}\text{H}_{18}\text{ClO}_4$  ( $[\text{M}+\text{H}]^+$ ) requires 357.0888, found 357.0888 ( $-0.0$  ppm).

**(S)-Ethyl 4-(2-chlorophenyl)-2-oxo-6-phenyl-3,4-dihydro-2H-pyran-5-carboxylate (31)**

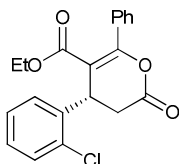

The title compound was prepared according to *General Procedure D* from (*E*)-3-chlorophenyl)acrylic anhydride (89 mg, 0.25 mmol), ethyl 3-oxo-3-phenylpropanoate (31  $\mu\text{L}$ , 0.18 mmol), HBTM 2.1 (2.8 mg, 0.009 mmol) and BEMP (2.0 mmol/g loading) (90 mg, 0.20 mmol) in  $\text{CH}_2\text{Cl}_2$  (0.25 mL) and purified by chromatography ( $\text{CH}_2\text{Cl}_2$ ) to afford the *lactone* **31** as a pale yellow oil (29 mg, 46%) in

96% ee;  $[\alpha]_{\text{D}}^{22}$   $-25.0$  ( $c$  1.3 in  $\text{CHCl}_3$ ); chiral HPLC analysis, ChiralPak AD-H (15% *i*-PrOH:hexane, flow rate 1.0 mL min<sup>-1</sup>, 220 nm, 30 °C),  $t_{\text{R}}$  major: 6.3 min,  $t_{\text{R}}$  minor: 7.4 min, 96% ee;  $\nu_{\text{max}}$  (film)/cm<sup>-1</sup> 2980 (C-H), 1728 (C=O), 1687 (C=O), 1597 (C=C), 1037 (C-Cl);  $\delta_{\text{H}}$  (400 MHz,  $\text{CDCl}_3$ ) 0.90 (3H, t,  $J$  7.1,  $\text{CH}_3$ ), 2.99 (1H, dd,  $J$  15.9, 2.4,  $\text{C}(3)\text{H}_2$ ), 3.09 (1H, dd,  $J$  16.0, 7.7,  $\text{C}(3)\text{H}_2$ ), 3.94 (2H, qd,  $J$  7.1, 2.7,  $\text{OCH}_2$ ), 4.92 (1H, dd,  $J$  7.7, 2.4,  $\text{C}(4)\text{H}$ ), 7.21-7.29 (3H, m  $\text{ArH}$ ), 7.39-7.52 (4H, m,  $\text{ArH}$ ), 7.50-7.61 (2H, m,  $\text{ArH}$ );  $\delta_{\text{C}}$  (75 MHz,  $\text{CDCl}_3$ ) 13.6 ( $\text{CH}_3$ ), 34.7 ( $\text{C}(3)\text{H}_2$ ), 35.9 ( $\text{C}(4)\text{H}$ ), 61.2 ( $\text{OCH}_2$ ), 110.6 ( $\text{C}(5)$ ), 127.4 ( $\text{ArCH}$ ), 127.7 ( $\text{ArCH}$ ), 128.2 ( $2\times\text{ArCH}$ ), 128.8 ( $2\times\text{ArCH}$ ), 129.3 ( $\text{ArCH}$ ), 130.5 ( $\text{ArCH}$ ), 130.5 ( $\text{ArCH}$ ), 132.9 ( $\text{PhC}(1)$ ), 133.5 ( $\text{C}(4)\text{ArC}(2)$ ), 136.6 ( $\text{C}(4)\text{ArC}(1)$ ), 160.0 ( $\text{C}(6)$ ), 165.7 ( $\text{CO}$ ), 166.0 ( $\text{CO}$ );  $m/z$  ( $\text{APCI}^+$ ) 357 ( $[\text{M}+\text{H}]^+$ , 65%), 375 ( $[\text{M}+\text{NH}_4]^+$ , 50%); HRMS ( $\text{APCI}^+$ )  $\text{C}_{20}\text{H}_{18}\text{ClO}_4$  ( $[\text{M}+\text{H}]^+$ ) requires 357.0888, found 357.0885 ( $-0.9$  ppm).

**(S)-Ethyl 4-(furan-2-yl)-2-oxo-6-phenyl-3,4-dihydro-2H-pyran-5-carboxylate (32)**

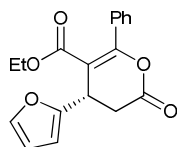

The title compound was prepared according to *General Procedure E* from (*E*)-3-(furan-2-yl)acrylic anhydride (258 mg, 1.0 mmol), ethyl 3-oxo-3-phenylpropanoate (124  $\mu\text{L}$ , 0.72 mmol), HBTM 2.1 (11.1 mg, 0.036 mmol) and BEMP (2.0 mmol/g loading) (360 mg, 0.80 mmol) in  $\text{CH}_2\text{Cl}_2$  (1.0 mL) and purified by chromatography ( $\text{CH}_2\text{Cl}_2$ ) to afford the *lactone* **32** as a yellow oil (146 mg, 65%);  $[\alpha]_{\text{D}}^{22}$   $-6.19$  ( $c$  1.0 in  $\text{CH}_2\text{Cl}_2$ ); chiral HPLC analysis, ChiralPak AD-H (5% *i*-PrOH:hexane, flow rate 0.5 mL min<sup>-1</sup>, 220 nm, 30 °C),  $t_{\text{R}}$  major: 24.8 min,  $t_{\text{R}}$  minor: 29.2 min, 92% ee;  $\nu_{\text{max}}$  (film)/cm<sup>-1</sup> 2982 (C-H), 2928 (C-H), 1728 (C=O), 1684 (C=O), 1014 (C-OC);  $\delta_{\text{H}}$  (500 MHz,  $\text{CDCl}_3$ ) 0.96 (3H, t,  $J$  7.1,  $\text{CH}_2\text{CH}_3$ ), 2.99 (1H, dd,  $J$  16.0, 7.2,  $\text{C}(3)\text{H}_2$ ), 3.12 (1H, dd,  $J$  16.0, 1.6,  $\text{C}(3)\text{H}_2$ ), 3.98-4.05 (2H, m,  $\text{OCH}_2$ ), 4.49 (1H, d,  $J$  6.2,  $\text{C}(4)\text{H}$ ), 6.18 (1H, d,  $J$  3.0, furanyl $\text{C}(3)\text{H}$ ), 6.29 (1H, s, furanyl $\text{C}(4)\text{H}$ ), 7.35 (1H, s, furanyl $\text{C}(5)\text{H}$ ), 7.37-7.48 (5H, m,  $\text{PhH}$ );  $\delta_{\text{C}}$  (75 MHz,  $\text{CDCl}_3$ ) 13.6 ( $\text{CH}_3$ ), 32.7 ( $\text{C}(4)\text{H}$ ), 33.3 ( $\text{C}(3)\text{H}_2$ ), 61.2 ( $\text{OCH}_2$ ), 106.5 (furanyl $\text{C}(3)\text{H}$ ), 109.5 ( $\text{C}(5)\text{H}$ ), 110.5 (furanyl $\text{C}(4)\text{H}$ ), 128.0 ( $2\times\text{ArCH}$ ), 128.7 ( $2\times\text{ArCH}$ ), 130.3 ( $\text{ArCH}$ ), 133.1 ( $\text{PhC}(1)$ ), 142.8 (furanyl $\text{C}(5)\text{H}$ ), 152.4 (furanyl $\text{C}(2)\text{H}$ ), 159.4 ( $\text{C}(6)\text{H}$ ), 165.9 ( $\text{CO}$ ), 166.1 ( $\text{CO}$ );  $m/z$  ( $\text{APCI}^+$ ) 345 ( $[\text{M}+\text{MeOH}+\text{H}]^+$ , 100%), 313 ( $[\text{M}+\text{H}]^+$ , 25%); HRMS ( $\text{APCI}^+$ )  $\text{C}_{18}\text{H}_{17}\text{O}_5$  ( $[\text{M}+\text{H}]^+$ ) requires 313.1071, found 313.1068 ( $-0.8$  ppm).

**(R)-Ethyl 6-methyl-2-oxo-4-phenyl-3,4-dihydro-2H-pyran-5-carboxylate (S17)**

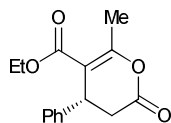

The title compound was prepared according to *General Procedure E* from (*E*)-cinnamic anhydride (280 mg, 1.00 mmol), ethyl acetoacetate (94  $\mu$ L, 0.72 mmol), HBTM 2.1 (2.8 mg, 0.009 mmol) and BEMP (2.0 mmol/g loading) (360 mg, 0.20 mmol) in  $\text{CH}_2\text{Cl}_2$  (1.0 mL) and purified by chromatography ( $\text{CH}_2\text{Cl}_2$ ) to afford the *lactone* **S17** as a white solid (135 mg, 72%); mp 79-80  $^\circ\text{C}$  {Lit<sup>9</sup> 83-84  $^\circ\text{C}$ } chiral HPLC analysis, ChiralPak OD-H (15% *i*-PrOH:hexane, flow rate 1.0 mL min<sup>-1</sup>, 254 nm, 30  $^\circ\text{C}$ ),  $t_{\text{R}}$  minor: 6.2 min,  $t_{\text{R}}$  major: 10.5 min, 70% ee;  $[\alpha]_{\text{D}}^{20}$  -101.5 (*c* 1.0 in  $\text{CH}_3\text{Cl}$ ), {Lit<sup>9</sup>  $[\alpha]_{\text{D}}^{20}$  -130.6 (*c* 1.0 in  $\text{CH}_3\text{Cl}$ ); 91% ee};  $\delta_{\text{H}}$  (300 MHz,  $\text{CDCl}_3$ ) 1.20 (3H, t, *J* 7.1,  $\text{CO}_2\text{CH}_2\text{CH}_3$ ), 2.48 (3H, d, *J* 1.0, C(6) $\text{CH}_3$ ), 2.83 (1H, dd, *J* 15.9, 2.4, C(3) $\text{H}_2$ ), 2.96 (1H, dd, *J* 15.9, 7.5, C(3) $\text{H}_2$ ), 4.14 (2H, q, *J* 7.1,  $\text{OCH}_2$ ), 4.26-4.28 (1H, m, C(4) $\text{H}$ ), 7.13-7.16 (2H, m, Ar $\text{H}$ ), 7.22-7.34 (3H, m, Ar $\text{H}$ ). Data in agreement with the literature.<sup>9</sup>

**(S)-Ethyl 4-methyl-2-oxo-6-phenyl-3,4-dihydro-2H-pyran-5-carboxylate (S18)**

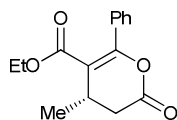

The title compound was prepared according to *General Procedure E* from (*E*)-but-2-enoic anhydride (39 mg, 0.25 mmol), ethyl 3-oxo-3-phenylpropanoate (31  $\mu$ L, 0.18 mmol), HBTM 2.1 (2.8 mg, 0.009 mmol) and BEMP (2.0 mmol/g loading) (90 mg, 0.20 mmol) in  $\text{CH}_2\text{Cl}_2$  (0.25 mL) and purified by chromatography ( $\text{CH}_2\text{Cl}_2$ ) to afford the *lactone* **S18** as a colourless oil (21 mg, 45%);  $[\alpha]_{\text{D}}^{22}$  +4.67 (*c* 0.5 in  $\text{CH}_2\text{Cl}_2$ ); chiral HPLC analysis, ChiralPak OD-H (2.5% *i*-PrOH:hexane, flow rate 0.5 mL min<sup>-1</sup>, 220 nm, 30  $^\circ\text{C}$ ),  $t_{\text{R}}$  minor: 21.1 min,  $t_{\text{R}}$  major: 23.5 min, 65% ee;  $\nu_{\text{max}}$  (film)/cm<sup>-1</sup> 2978 (C-H), 2938 (C-H), 1728 (C=O), 1705 (C=O), 1690 (C=O);  $\delta_{\text{H}}$  (500 MHz,  $\text{CDCl}_3$ ) 0.98 (3H, t, *J* 7.1,  $\text{CH}_2\text{CH}_3$ ), 1.24 (3H, d, *J* 7.1, C(4) $\text{CH}_3$ ), 2.65 (1H, dd, *J* 15.8, 2.1, C(3) $\text{H}_2$ ), 2.83 (1H, dd, *J* 15.8, 6.7, C(3) $\text{H}_2$ ), 3.20 (1H, tt, *J* 6.9, 3.6, C(4) $\text{H}$ ), 4.03 (2H, q, *J* 7.1,  $\text{OCH}_2$ ), 7.38 (5H, dt, *J* 14.2, 7.4, Ph $\text{H}$ );  $\delta_{\text{C}}$  (100 MHz,  $\text{CDCl}_3$ ) 13.7 ( $\text{CH}_2\text{CH}_3$ ), 19.3 (C(4)( $\text{CH}_3$ )), 28.4 (C(4) $\text{H}$ ), 35.7 (C(3) $\text{H}_2$ ), 61.0 ( $\text{OCH}_2$ ), 114.1 (Ar $\text{CH}$ ), 128.0 (2 $\times$ Ar $\text{CH}$ ), 128.6 (2 $\times$ Ar $\text{CH}$ ), 130.0 (Ar $\text{CH}$ ), 133.3 (PhC(1)), 157.5(C(6)), 166.8 (CO), 167.0 (CO); *m/z* (NSI<sup>+</sup>) 261 ([ $\text{M}+\text{H}$ ]<sup>+</sup>, 60%); HRMS (NSI<sup>+</sup>)  $\text{C}_{15}\text{H}_{17}\text{O}_4$  ([ $\text{M}+\text{H}$ ]<sup>+</sup>) requires 261.1121, found 261.1125 (+1.4 ppm).

**(R)-4-Phenyl-3,4,7,8-tetrahydro-2H-chromene-2,5(6H)-dione (34)**

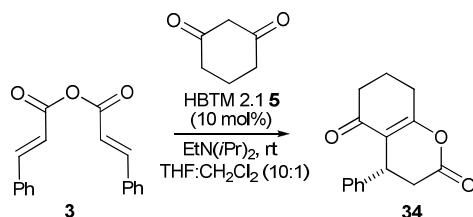

The title compounds were prepared according to *General Procedure E* using 1,3-cyclohexanedione (80 mg, 0.72 mmol), anhydride **3** (278 mg, 1.00 mmol), HBTM 2.1 (22 mg, 10 mol %) and EtN(*i*Pr)<sub>2</sub> (138 μL, 0.80 mmol) in THF:DCM (10:1, 2 mL) and purified by chromatography (CH<sub>2</sub>Cl<sub>2</sub>) to afford the title lactone **34** as a yellow solid (139 mg, 80%); mp 112-113 °C; [α]<sub>D</sub><sup>20</sup> -118.2 (*c* 1.0, CHCl<sub>3</sub>); HPLC analysis, ChiralPak AD-H (5% *i*-PrOH:hexane, flow rate 1.0 mL min<sup>-1</sup>, 220 nm, 30 °C), t<sub>R</sub> major: 14.9 min, t<sub>R</sub> minor: 22.5, 82% ee; ν<sub>max</sub> (film) 2953 (C-H), 1784 (C=O), 1705 (C=O); δ<sub>H</sub> (400 MHz, CDCl<sub>3</sub>) 2.06-2.18 (2H, m, CH<sub>2</sub>), 2.45-2.48 (2H, m, CH<sub>2</sub>), 2.61-2.75 (2H, m, CH<sub>2</sub>), 2.90-2.99 (2H, m, C(3)H), 4.32 (1H, t, *J* 5.0, C(4)H), 7.14-7.17 (2H, m, 2×ArH), 7.20-7.25 (1H, m, ArH), 7.28-7.32 (2H, m, 2×ArH); δ<sub>C</sub> (100 MHz, CDCl<sub>3</sub>) 20.5 (C(7)H<sub>2</sub>), 27.2 (C(8)H<sub>2</sub>), 33.7 (C(4)H), 36.2 (C(3)H<sub>2</sub>), 36.6 (C(6)H<sub>2</sub>), 117.1 (C=CO), 126.4 (2×C(4)ArC(2)H), 127.4 (C(4)ArC(4)H), 128.9 (2×C(4)ArC(3)H), 140.4 (C(4)ArC(1)), 165.8 (C(10)), 167.3 (C(2)O), 196.2 (C(5)O); *m/z* (NSI<sup>+</sup>) 243 ([M+H]<sup>+</sup>, 60%); HRMS (NSI<sup>+</sup>) C<sub>15</sub>H<sub>15</sub>O<sub>3</sub> ([M+H]<sup>+</sup>) requires 243.1016, found 243.1018 (+0.9 ppm).

**General Procedure F: Using Azaaryl Ketone 35**

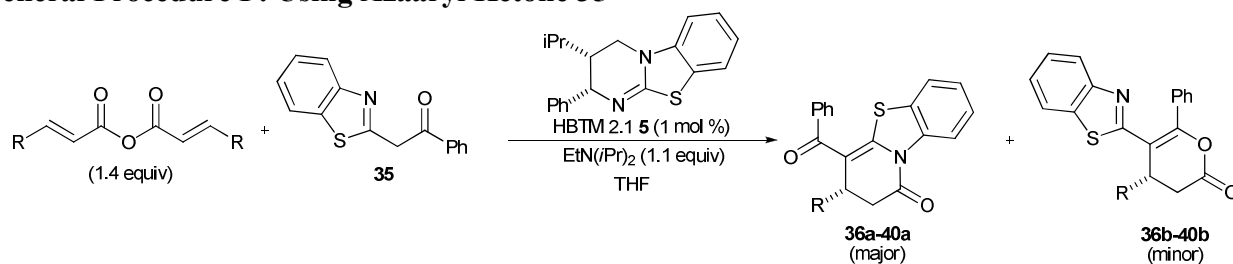

To a solution of the corresponding homoanhydride (1.05-1.4 equiv) in THF (0.72 mM), was added azaaryl ketone **35** (1.0 equiv), isothioureia (HBTM 2.1, 0.01 equiv) and EtN(*i*Pr)<sub>2</sub> (1.1 equiv) at 0 °C. The reaction mixture was stirred and gradually warmed to room temperature over 5 h. The solution was diluted with EtOAc and washed sequentially with 0.1 M HCl and saturated NaHCO<sub>3</sub> solution, dried over anhydrous MgSO<sub>4</sub>, filtered and concentrated *in vacuo*. The residue was purified by column chromatography on silica gel to afford dihydropyridones **36-40a** as the major product and dihydropyranones **36b-40b** as the minor product.

**(11R)-10-Benzoyl-11-phenyl-8-thia-1-azatricyclo[7.4.0.0<sup>2,7</sup>]trideca-2,4,6,9-tetraen-13-one (36a)**  
**and (4R)-5-(1,3-benzothiazol-2-yl)-4,6-diphenyl-3,4-dihydro-2H-pyran-2-one (36b)**

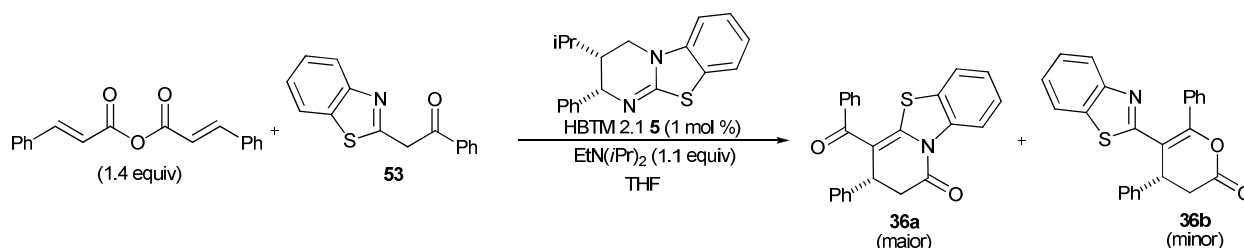

The title compounds were prepared according to *General Procedure F* using azaaryl ketone **35** (455 mg, 1.80 mmol), anhydride **3** (700 mg, 2.50 mmol), HBTM 2.1 (5.5 mg, 1 mol %) and EtN(iPr)<sub>2</sub> (0.35 mL, 2.00 mmol) in THF (5 mL) and purified by chromatography on silica gel (10:2 CH<sub>2</sub>Cl<sub>2</sub>/hexane) to afford **36a** as a yellow solid (595 mg, 86%) and **36b** as a yellow solid (63 mg, 9%). The major isomer was suspended in Et<sub>2</sub>O then recrystallised from EtOAc: crystals were obtained (68 mg, 10% overall yield, 4% ee) plus liquors which were concentrated *in vacuo* to give a yellow solid.

**36a (major):** (472 mg, 68% yield, 97% ee); mp 168–171 °C; [ $\alpha$ ]<sub>D</sub><sup>20</sup> –148.5 (*c* 1.0 in CHCl<sub>3</sub>); chiral HPLC analysis, ChiralPak AD-H (20% *i*-PrOH:hexane, flow rate 1 mL min<sup>-1</sup>, 211 nm, 30 °C), *t*<sub>R</sub> minor: 13.2 min, *t*<sub>R</sub> major: 22.5 min, 97% ee;  $\nu_{\max}$  (film)/cm<sup>-1</sup> 3024 (C-H), 2984 (C-H), 2913 (C-H), 1722 (C=O), 1597 (C=C), 1574 (C=C), 1477 (C-N), 1360 (C-S), 1269 (C-O);  $\delta_{\text{H}}$  (500 MHz, CDCl<sub>3</sub>) 3.05 (1H, dd, *J* 15.9, 2.2, C(12)H<sub>2</sub>), 3.29 (1H, dd, *J* 15.9, 6.9, C(12)H<sub>2</sub>), 4.38 (1H, dd, *J* 6.9, 2.2, C(11)H), 7.11 (2H, d, *J* 7.2, 2×C(11)PhC(2)H), 7.21–7.44 (10H, m, ArH), 7.62 (1H, s, C(6)H), 8.47 (1H, d, *J* 7.8, C(3)H);  $\delta_{\text{C}}$  (126 MHz, CDCl<sub>3</sub>) 38.6 (C(11)H), 41.4 (C(12)H<sub>2</sub>), 107.7 (C(10)), 117.5 (C(3)H), 122.0 (C(6)H), 125.9 (C(5)H), 126.8 (2×C(11)PhC(2)H), 127.0 (2×C(10)COPhC(3)H, C(4)H), 127.6 (C(11)PhC(4)H), 127.8 (C(7)), 128.1 (2×C(10)COPhC(2)H), 129.3 (2×C(11)PhC(3)H), 130.3 (C(10)COPhC(4)H), 136.0 (C(2)), 139.4 (C(10)COPhC(1)), 140.8 (C(11)PhC(1)), 156.2 (C(9)), 167.9 (C(13)O), 191.2 (C(10)CO); *m/z* (NSI<sup>+</sup>) 384 ([M+H]<sup>+</sup>, 60%); HRMS (NSI<sup>+</sup>) C<sub>24</sub>H<sub>18</sub>O<sub>2</sub>NS ([M+H]<sup>+</sup>) requires 384.1053, found 384.1052 (–0.2 ppm).

**36b (minor):** (63 mg, 9%); mp 192–194 °C; [ $\alpha$ ]<sub>D</sub><sup>20</sup> –18.4 (*c* 1.0 in CHCl<sub>3</sub>); chiral HPLC analysis, ChiralPak AD-H (20% *i*-PrOH:hexane, flow rate 1 mL min<sup>-1</sup>, 211 nm, 30 °C), *t*<sub>R</sub> major: 7.7 min, *t*<sub>R</sub> minor: 10.8 min, 86% ee;  $\nu_{\max}$  (film)/cm<sup>-1</sup> 2974 (C-H), 2372 (C-H), 1775 (C=O), 1647 (C=N), 1491 (C=C), 1435 (C=C), 1339 (C-S), 1271 (C-O);  $\delta_{\text{H}}$  (300 MHz, CDCl<sub>3</sub>) 3.08 (1H, dd, *J* 15.8, 1.6, C(3)H<sub>2</sub>), 3.32 (1H, dd, *J* 15.8, 7.6, C(3)H<sub>2</sub>), 5.03 (1H, dd, *J* 7.6, 1.6, C(4)H), 7.23–7.36 (6H, m, ArH), 7.38–7.52 (3H, m, ArH), 7.55–7.63 (4H, m, ArH), 7.93 (1H, d, *J* 7.8, HetArH);  $\delta_{\text{C}}$  (75 MHz, CDCl<sub>3</sub>) 36.9 (C(3)H<sub>2</sub>), 41.3 (C(4)H), 115.1 (C(5)), 121.3 (C(5)HetArCH), 123.1 (C(5)HetArCH), 125.5

(C(5)HetArCH), 126.1 (C(5)HetArCH), 127.0 (2×C(4)PhC(2)H), 127.8 (C(4)PhC(4)H), 128.9 (2×C(6)PhC(3)H), 129.3 (2×C(4)PhC(3)H), 130.1 (2×C(6)PhC(2)H), 130.8 (C(6)PhC(4)H), 131.9 (C(6)PhC(1)), 135.7 (C(5)HetArC), 139.6 (C(4)PhC(1)), 152.4 (C(5)HetArC), 154.4 (C(6)), 164.2 (C(5)HetArC=N), 166.6 (C(2)O);  $m/z$  (NSI<sup>+</sup>) 384 ([M+H]<sup>+</sup>, 60%); HRMS (NSI<sup>+</sup>) C<sub>24</sub>H<sub>18</sub>O<sub>2</sub>NS ([M+H]<sup>+</sup>) requires 384.1053, found 384.1052 (−0.2 ppm).

**(11*R*)-10-Benzoyl-11-(3-methylphenyl)-8-thia-1-azatricyclo[7.4.0.0<sup>2,7</sup>]trideca-2(7),3,5,9-tetraen-13-one (37a) and (*R*)-5-(benzo[d]thiazol-2-yl)-6-phenyl-4-*m*-tolyl-3,4-dihydro-2H-pyran-2-one (37b)**

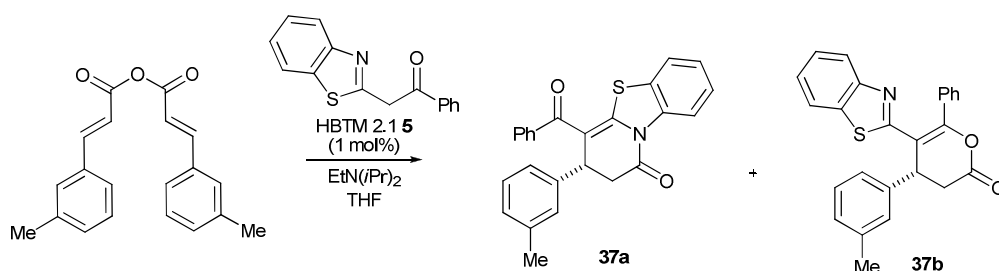

The title compounds were prepared according to *General Procedure F* using azaaryl ketone **35** (607 mg, 2.40 mmol), anhydride **S6** (771 mg, 2.52 mmol), HBTM 2.1 (7 mg, 1 mol %) and EtN(*i*Pr)<sub>2</sub> (0.46 mL, 2.64 mmol) in THF (4 mL) and purified by chromatography (20% hexane/CH<sub>2</sub>Cl<sub>2</sub>) to afford the title compounds **37a** and **37b** as yellow solids.

**37a (major):** (732 mg, 77%); mp 159-161 °C; [α]<sub>D</sub><sup>20</sup> −101.0 (*c* 1.0, CHCl<sub>3</sub>); chiral HPLC analysis, ChiralPak AD-H (20% *i*-PrOH:hexane, flow rate 1.0 mL min<sup>−1</sup>, 211 nm, 30 °C), *t*<sub>R</sub> minor: 10.8 min, *t*<sub>R</sub> major: 16.4 min, 86% ee;  $v_{\max}$  (film) 1714(C=O), 1604 (C=O), 1481;  $\delta_{\text{H}}$  (400 MHz, CDCl<sub>3</sub>) 2.28 (3H, s, ArCH<sub>3</sub>), 3.05 (1H, dd, *J* 15.9, 2.4, C(12)H<sub>2</sub>), 3.27 (1H, dd, *J* 15.9, 6.9, C(12)H<sub>2</sub>), 4.31 (1H, dd, *J* 6.9, 2.4, C(11)H), 6.89 (2H, d, *J* 9.3, ArH), 7.06 (1H, d, *J* 7.5, ArH), 7.17 (1H, t, *J* 7.5, ArH), 7.28 (2H, s, ArH), 7.29 (2H, s, ArH), 7.32-7.42 (3H, m, ArH), 7.61-7.64 (1H, m, ArH), 8.45-8.49 (1H, m, ArH);  $\delta_{\text{C}}$  (100 MHz, CDCl<sub>3</sub>) 21.5 (C(11)ArCH<sub>3</sub>), 38.4 (C(11)H), 41.3 (C(12)H<sub>2</sub>), 107.7 (C10), 117.5 (C(6)ArCH), 121.9 (C(5)ArCH), 123.7 (C(11)ArC(6)H), 125.8 (C(4)H), 126.9 (C(11)ArC(4)H), 127.0 (2×C(10)ArC(2)H), 127.4 (C(3)H), 127.8 (C(7)), 128.0 (2×C(10)ArC(3)H), 128.3 (C(11)ArC(5)H), 129.1 (C(11)ArC(2)H), 130.2 (C(10)ArC(4)H), 136.0 (C(11)Ar(3)C), 138.9 (C(10)ArC(1)), 139.3 (C(2)ArC), 140.7 (C(11)ArC(1)), 156.1 (C(9)), 167.9 (C(13)=O), 191.2 (C(10)=O).

**37b (minor):** (39 mg, 4%); mp 146-147 °C; [α]<sub>D</sub><sup>20</sup> −9.7 (*c* 0.75, CHCl<sub>3</sub>); HPLC analysis, ChiralPak AD-H (20% *i*-PrOH:hexane, flow rate 1.0 mL min<sup>−1</sup>, 211 nm, 30 °C), *t*<sub>R</sub> minor: 6.9 min, *t*<sub>R</sub> major: 9.7 min, 85% ee;  $v_{\max}$  (film) 2982 (C-H), 1772 (C=O), 1504;  $\delta_{\text{H}}$  (400 MHz, CDCl<sub>3</sub>) 2.31 (3H, s,



C(4)ArCH<sub>3</sub>), 3.07 (1H, dd, *J* 15.7, 0.7, C(3)H<sub>2</sub>), 3.31 (1H, dd, *J* 15.7, 7.6, C(3)H<sub>2</sub>), 4.97 (1H, dd, *J* 7.7, 1.7, C(4)H), 7.04 (1H, d, *J* 7.8, C(4)ArC(4)H), 7.11-7.13 (1H, m, C(4)ArC(6)H), 7.16-7.22 (1H, m, C(4)ArC(2)H), 7.25-7.32 (2H, m, 2×C(5)HetArCH), 7.37-7.46 (3H, m, C(6)ArC(3,4)H), 7.48-7.53 (1H, m, C(4)ArC(5)H), 7.56-7.60 (2H, m, 2×C(6)ArC(2)H), 7.62 (1H, d, *J* 8.0, C(5)HetArCH), 7.93 (1H, d, *J* 8.2, C(5)HetArCH); δ<sub>c</sub> (100 MHz, CDCl<sub>3</sub>) 21.5 (ArCH<sub>3</sub>), 36.9 (C(3)H<sub>2</sub>), 41.2 (C(4)H), 115.0 (C(6)), 121.2 (C(5)HetArCH), 123.0 (C(5)HetArCH), 123.8 (C(5)HetArCH), 125.3 (C(4)ArC(6)H), 125.9 (C(5)HetArCH), 127.7 (C(4)ArC(4)H), 128.5 (C(6)ArC(4)H), 128.8 (2×C(6)ArC(2)H), 129.0 (C(4)ArC(5)H), 129.9 (2×C(6)ArC(3)H), 130.7 (C(4)ArC(2)H), 131.9 (C(6)ArC(1)), 135.7 (C(5)HetArC), 138.8 (C(4)ArC(3)), 139.4 (C(4)ArC(1)), 152.4 (C(5)), 154.1 (C(5)HetArC), 164.1 (C(5)HetArC=N), 166.6 (C(2)).

**(11*S*)-10-Benzoyl-11-(furan-2-yl)-8-thia-1-azatricyclo[7.4.0.0<sup>2,7</sup>]trideca-2,4,6,9-tetraen-13-one (38a) and (4*S*)-5-(1,3-benzothiazol-2-yl)-4-(furan-2-yl)-6-phenyl-3,4-dihydro-2H-pyran-2-one (38b)**

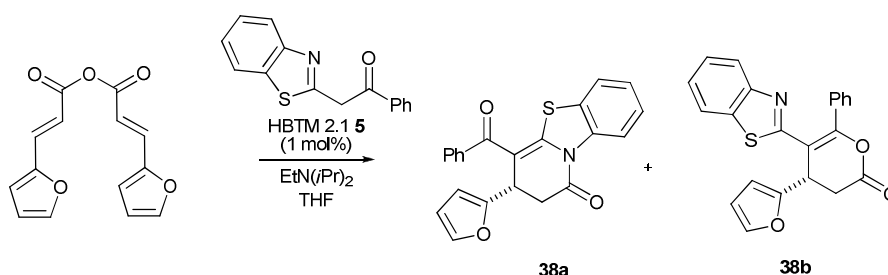

The title compounds were prepared according to *General Procedure F* using azaaryl ketone **35** (421 mg, 1.67 mmol), anhydride **S4** (430 mg, 1.67 mmol), HBTM 2.1 (5 mg, 1 mol %) and EtN(*i*Pr)<sub>2</sub> (319 μL, 1.8 mmol) in THF (3 mL) and purified by chromatography (20% hexanes/CH<sub>2</sub>Cl<sub>2</sub>) to afford the title compounds **38a** as a yellow solid and **38b** as a yellow solid.

**38a (major):** (446 mg, 72%); mp 127-128 °C; [α]<sub>D</sub><sup>20</sup> -30.3 (*c* 1.0, CHCl<sub>3</sub>); HPLC analysis, ChiralPak AD-H (20% *i*-PrOH:hexane, flow rate 1.0 mL min<sup>-1</sup>, 211 nm, 30 °C), t<sub>R</sub> minor: 15.0 min t<sub>R</sub> major: 20.3 min, 80% ee; ν<sub>max</sub> (film)/cm<sup>-1</sup> 3142 (C-H), 3136 (C-H), 2363 (C-H), 1732 (C=O), 1626 (C=C), 1605 (C=C), 1474 (C-N), 1362 (C-S), 1275 (C-O); δ<sub>H</sub> (400 MHz, CDCl<sub>3</sub>) 3.16 (1H, dd, *J* 16.1, 6.0, CH<sub>2</sub>), 3.24 (1H, dd, *J* 16.1 2.6, CH<sub>2</sub>), 4.43 (1H, ddd, *J* 6.1, 2.6, 1.0, C(11)H), 5.95 (1H, m, furanylC(x)H), 6.24 (1H, dd, *J* 3.3, 1.9, furanylC(4)H), 7.29-7.51 (8H, m, ArH), 7.54-7.61 (1H, m, ArH), 8.46-8.53 (1H, m, ArH); δ<sub>c</sub> (100 MHz, CDCl<sub>3</sub>) 32.9 (C(11)H), 37.9 (C(12)H<sub>2</sub>), 105.6 (C(10)), 106.8 (furanylC(3)H), 110.3 (furanylC(4)H), 117.6 (ArCH<sub>2</sub>), 121.9 (ArCH), 125.8 (ArCH), 126.9 (2×ArCH),

127.0 (ArCH), 127.5 (C(7)), 128.2 (2×ArCH), 130.4 (ArCH), 136.0 (C(10)ArC(1)), 139.3 (C(2)), 142.7 (furanylC(5)H), 153.5 (furanylC(1)), 156.6 (C(9)), 167.7 (C(13)=O), 190.8 (C(10)C=O).

**38b (minor):** (60 mg, 10%) mp 122-125 °C;  $[\alpha]_D^{22}$  -6.2 (*c* 1.0 in CH<sub>2</sub>Cl<sub>2</sub>); chiral HPLC analysis, ChiralPak AD-H (20% *i*-PrOH:hexane, flow rate 1 mL min<sup>-1</sup>, 211 nm, 30 °C), *t<sub>R</sub>* minor: 7.6 min, *t<sub>R</sub>* major: 15.0 min, 80% ee;  $\nu_{\max}$  (film)/cm<sup>-1</sup> 3117 (C-H), 3063 (C-H), 2924 (C-H), 1782 (C=O), 1649 (C=N), 1597 (C=C), 1344 (C-S), 1277 (C-O);  $\delta_H$  (300 MHz, CDCl<sub>3</sub>) 3.20 (1H, dd, *J* 15.9, 6.7, C(3)H<sub>2</sub>), 3.26 (1H, dd, *J* 15.9, 1.9, C(3)H<sub>2</sub>), 5.14 (1H, dd, *J* 6.8, 2.0, C(4)H), 6.18 (1H, d, *J* 3.3, furanyl(3)H), 6.24 (1H, dd, *J* 3.3, 1.8, furanyl(4)H), 7.31 (1H, t, *J* 7.6, ArH), 7.34 (1H, d, *J* 1.8, furanyl(5)H), 7.44 (3H, td, *J* 7.3, 1.5, ArH), 7.49-7.57 (3H, m, ArH), 7.61-7.68 (1H, m, ArH), 7.98 (1H, d, *J* 8.2, ArH);  $\delta_C$  (75 MHz, CDCl<sub>3</sub>) 33.9 (C(3)), 35.1 (C(4)), 106.9 (furanylC(3)H), 110.4 (furanylC(4)H), 113.3 (C(5)), 121.3 (C(5)HetArC(7)H), 123.1 (C(5)HetArC(4)H), 125.6 (C(5)HetArC(6)H), 126.2 (C(5)HetArC(5)H), 129.0 (2×C(6)PhC(3)H), 130.1 (2×C(6)PhC(2)H), 131.0 (C(6)PhC(4)H), 131.8 (C(6)PhC(1)), 135.7 (C(5)HetArC(7a)), 142.8 (furanylC(5)H), 152.2 (furanylC(2)), 152.4 (C(5)HetArC(3a)), 154.8 (C(6)), 164.0 (C(5)HetArC=N), 166.4 (C(2)O).

**(11*S*)-10-Benzoyl-11-propyl-8-thia-1-azatricyclo[7.4.0.0<sup>2,7</sup>]trideca-2,4,6,9-tetraen-13-one (39a)**  
**and (4*S*)-5-(1,3-benzothiazol-2-yl)-6-phenyl-4-propyl-3,4-dihydro-2H-pyran-2-one (39b)**

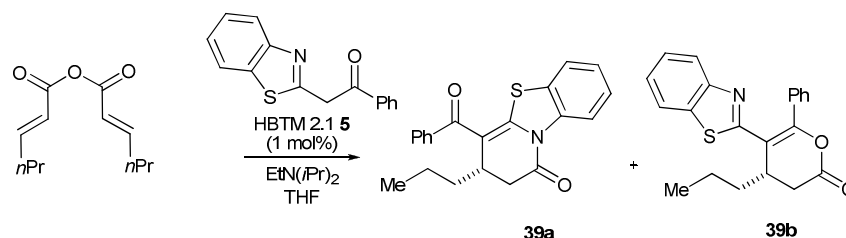

The title compounds were prepared according to *General Procedure F* using azaaryl ketone **35** (182 mg, 0.72 mmol), anhydride **S10** (314 mg, 1.00 mmol), HBTM 2.1 (2 mg, 1 mol %) and EtN(*i*Pr)<sub>2</sub> (138 μL, 0.79 mmol) in THF (2 mL) and purified by chromatography on silica gel (10:2 CH<sub>2</sub>Cl<sub>2</sub>/hexane) to afford **39a** as a yellow solid and **39b** as a yellow solid.

**39a (major):** (502 mg, 79%); mp 143-145 °C;  $[\alpha]_D^{20}$  +148.1 (*c* 1.0 in CHCl<sub>3</sub>); chiral HPLC analysis, ChiralPak AD-H (20% *i*-PrOH:hexane, flow rate 1 mL min<sup>-1</sup>, 211 nm, 30 °C), *t<sub>R</sub>* minor: 10.3 min, *t<sub>R</sub>* major: 16.0 min, 88% ee;  $\nu_{\max}$  (film)/cm<sup>-1</sup> 2957 (C-H), 2930 (C-H), 2870 (C-H), 1717 (C=O), 1599 (C=C), 1574 (C=C), 1474 (C-N), 1368 (C-S), 1275 (C-O);  $\delta_H$  (400 MHz, CDCl<sub>3</sub>) 0.55 (3H, t, *J* 7.3, CH<sub>3</sub>), 1.04 (2H, dq, *J* 15.3, 7.9, 7.0, CH<sub>2</sub>CH<sub>3</sub>), 1.30 (2H, q, *J* 7.9, CH<sub>2</sub>CH<sub>2</sub>CH<sub>3</sub>), 2.77 (1H, dd, *J* 16.2, 2.1, C(12)H<sub>2</sub>), 2.96 (1H, dd, *J* 16.2, 6.3, C(12)H<sub>2</sub>), 3.13 (1H, qd, *J* 7.0, 2.1, C(11)H), 7.17-7.23 (1H, m,

C(5)H), 7.23-7.29 (1H, m, C(4)H), 7.33-7.38 (3H, m, C(10)COPhC(3)H, C(10)COPhC(4)H), 7.39-7.42 (2H, m, C(10)COPhC(2)H), 7.44 (1H, dd,  $J$  7.5, 1.1, C(6)H), 8.39- 8.47 (1H, m, C(3)H);  $\delta_C$  (126 MHz, CDCl<sub>3</sub>) 13.6 (CH<sub>3</sub>), 19.6 (CH<sub>2</sub>CH<sub>2</sub>CH<sub>3</sub>), 32.3 (C(11)H), 35.8(CH<sub>2</sub>CH<sub>2</sub>CH<sub>3</sub>), 37.7, (C(12)H<sub>2</sub>) 109.8 (C(10)), 117.6 (C(3)H), 121.9 (C(6)H), 125.8 (C(5)H), 127.0 (C(4)H), 127.2 (2×C(10)COPhC(3)H), 127.7 (C(7)), 128.4 (2×C(10)COPhC(2)H), 130.1 (C(10)COPhC(4)H), 136.2 (C(2)), 140.1 (C(10)COPhC(1)), 154.4 (C(9)), 169.1 (C(13)O), 191.8 (C(10)CO);  $m/z$  (NSI<sup>+</sup>) 372 ([M+Na]<sup>+</sup>, 100%), 350 ([M+H]<sup>+</sup>, 30%); HRMS (NSI<sup>+</sup>) C<sub>21</sub>H<sub>20</sub>O<sub>2</sub>NS ([M+H]<sup>+</sup>) requires 350.1209, found 350.1204 (−1.5 ppm).

**39b (minor):** (47 mg, 7%); mp 192-194 °C;  $[\alpha]_D^{20}$  −1.3 ( $c$  1.0 in CHCl<sub>3</sub>); chiral HPLC analysis, ChiralPak AD-H (20% *i*-PrOH:hexane, flow rate 1 mL min<sup>−1</sup>, 211 nm, 30 °C),  $t_R$  minor: 4.9 min,  $t_R$  major: 7.0 min, 92% ee;  $\nu_{max}$  (film)/cm<sup>−1</sup> 2953 (C-H), 2926 (C-H), 2870 (C-H), 1770 (C=O), 1651 (C=N), 1491 (C=C), 1354 (C-S), 1273 (C-O);  $\delta_H$  (500 MHz, CDCl<sub>3</sub>) 0.90 (3H, t,  $J$  7.2, CH<sub>3</sub>), 1.32 (1H, dq,  $J$  18.8, 6.1, CH<sub>2</sub>CH<sub>2</sub>CH<sub>3</sub>), 1.40-1.58 (2H, m, CH<sub>2</sub>CH<sub>2</sub>CH<sub>3</sub>), 1.61-1.71 (1H, m, CH<sub>2</sub>CH<sub>2</sub>CH<sub>3</sub>), 2.85-3.00 (2H, m, C(3)H<sub>2</sub>), 3.70-3.77 (1H, m, C(4)H), 7.32 (1H, t,  $J$  7.5, C(5)HetArCH), 7.34-7.36 (2H, m, ArH), 7.37-7.49 (4H, m, ArH), 7.66 (1H, d,  $J$  8.0, C(5)HetArCH), 7.98 (1H, d,  $J$  8.2, (C(5)HetArCH);  $\delta_C$  (126 MHz, CDCl<sub>3</sub>) 14.1 (CH<sub>3</sub>), 19.9 (CH<sub>2</sub>CH<sub>2</sub>CH<sub>3</sub>), 33.5 (CH<sub>2</sub>CH<sub>2</sub>CH<sub>3</sub>), 35.2 (C(4)H), 35.5 (C(3)H<sub>2</sub>), 117.2 (C(5)), 121.4 (C(5)HetArC(7)H), 123.0 (C(5)HetArC(4)H), 125.5 (C(5)HetArC(6)H), 126.2 (C(5)HetArC(5)H), 128.9 (2×C(6)PhC(3)H), 130.1 (2×C(6)PhC(2)H), 130.6 (C(6)PhC(4)H), 132.1 (C(6)PhC(1)), 134.7 (C(5)HetArC), 152.5 (C(5)HetArC), 153.5 (C(6)), 164.7 (C(5)HetArC=N), 167.8 (C(2)O);  $m/z$  (NSI<sup>+</sup>) 372 ([M+Na]<sup>+</sup>, 100%), 350 ([M+H]<sup>+</sup>, 55%); HRMS (NSI<sup>+</sup>) C<sub>21</sub>H<sub>20</sub>O<sub>2</sub>NS ([M+H]<sup>+</sup>) requires 350.1209, found 350.1210 (+0.2 ppm).

**(11*R*)-10-Benzoyl-11-(4-methoxyphenyl)-8-thia-1-azatricyclo[7.4.0.0<sup>2,7</sup>]trideca-2,4,6,9-tetraen-13-one (40a) and (4*R*)-5-(1,3-benzothiazol-2-yl)-4-(4-methoxyphenyl)-6-phenyl-3,4-dihydro-2H-pyran-2-one (40b)**

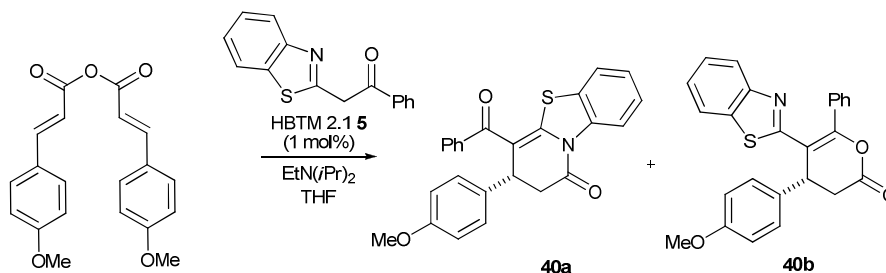

The title compounds were prepared according to *General Procedure F* using azaaryl ketone **35** (182 mg, 0.72 mmol), anhydride **S3** (314 mg, 1.00 mmol), HBTM 2.1 (2 mg, 1 mol %) and EtN(*i*Pr)<sub>2</sub> (138  $\mu$ L, 0.79 mmol) in

THF (2 mL) and purified by chromatography on silica gel (10:2 CH<sub>2</sub>Cl<sub>2</sub>/hexane) to afford **40a** as a yellow solid and **40b** as a yellow solid

**40a (major)**: (436 mg, 59%); mp 190-191 °C;  $[\alpha]_D^{20}$  -135.6 (*c* 1.0 in CHCl<sub>3</sub>); chiral HPLC analysis, ChiralPak AD-H (20% *i*-PrOH:hexane, flow rate 1 mL min<sup>-1</sup>, 211 nm, 30 °C), *t*<sub>R</sub> minor: 18.4 min, *t*<sub>R</sub> major: 31.1 min, 85% ee;  $\nu_{\max}$  (film)/cm<sup>-1</sup> 2972 (C-H), 2843 (C-H), 1721 (C=O), 1603 (C=C), 1510 (C=C), 1474 (C-N), 1358 (C-S), 1298 (C-O);  $\delta_H$  (300 MHz, CDCl<sub>3</sub>) 3.00 (1H, dd, *J* 15.8, 2.3, C(12)H<sub>2</sub>), 3.24 (1H, dd, *J* 15.8, 6.6 C(12)H<sub>2</sub>), 3.77 (3H, s, OCH<sub>3</sub>), 4.29 (1H, dd, *J* 6.6, 2.2, C(11)H), 6.78-6.84 (2H, m, C(11)ArC(3)H), 6.97-7.05 (2H, m, C(11)ArC(2)H), 7.23-7.31 (4H, m, ArH), 7.32-7.43 (3H, m, ArH), 7.56-7.65 (1H, m, C(6)H), 8.43-8.49 (1H, m, C(3)H);  $\delta_C$  (75 MHz, CDCl<sub>3</sub>) 38.0 (C(11)H), 41.8 (C(12)H<sub>2</sub>), 55.4 (OCH<sub>3</sub>), 108.2 (C(10)), 114.8 (2×C(11)ArC(3)H), 117.7 (C(3)H), 122.1 (C(6)H), 126.0 (C(5)H), 127.2 (2×ArCH and C(4)H), 127.9 (C(7)), 128.0 (2×ArCH), 128.2 (2×ArCH), 130.4 (C(10)COPhC(4)H), 132.7 (C(11)ArC(1)), 136.2 (C(2)), 139.5 (C(10)COPhC(1)), 156.1 (C(9)), 159.0 (C(11)ArC(4)), 168.2 (C(13)O), 191.4 (C(10)CO); *m/z* (NSI<sup>+</sup>) 436 ([M+Na]<sup>+</sup>, 100%), 414 ([M+H]<sup>+</sup>, 60%); HRMS (NSI<sup>+</sup>) C<sub>25</sub>H<sub>20</sub>O<sub>3</sub>NS ([M+H]<sup>+</sup>) requires 414.1158, found 414.1160 (+0.4 ppm).

**40b (minor)**: (41 mg, 6%); mp 148-151 °C;  $[\alpha]_D^{20}$  +19.2 (*c* 1.0 in CHCl<sub>3</sub>); chiral HPLC analysis, ChiralPak AD-H (20% *i*-PrOH:hexane, flow rate 1 mL min<sup>-1</sup>, 211 nm, 30 °C), *t*<sub>R</sub> minor: 9.7 min, *t*<sub>R</sub> major: 14.6 min, 89% ee;  $\nu_{\max}$  (film)/cm<sup>-1</sup> 2944 (C-H), 1778 (C=O), 1645 (C=N), 1510 (C=C), 1435 (C=C), 1346 (C-S), 1240 (C-O);  $\delta_H$  (500 MHz, CDCl<sub>3</sub>) 3.06 (1H, dd, *J* 15.7, 1.4, C(3)H<sub>2</sub>), 3.30 (1H, dd, *J* 15.7, 7.5, C(3)H<sub>2</sub>), 3.75 (3H, s, OCH<sub>3</sub>), 4.97 (1H, d, *J* 6.5, C(4)H), 6.84 (2H, d, *J* 8.7, C(4)ArC(3)H), 7.28 (3H, dd, *J* 16.1, 8.3, C(4)ArC(2)H, C(5)HetArC(5)H), 7.38-7.46 (3H, m, C(5)HetArC(6)H, C(6)PhC(3)H), 7.50 (1H, m, C(6)PhC(4)H), 7.55-7.59 (2H, m, C(6)PhC(2)H), 7.62 (1H, d, *J* 8.0, C(5)HetArC(4)H), 7.95 (1H, d, *J* 8.2, C(5)HetArC(7)H);  $\delta_C$  (126 MHz, CDCl<sub>3</sub>) 37.2 (C(3)H<sub>2</sub>), 40.6 (C(4)H), 55.3 (OCH<sub>3</sub>), 114.6 (2×C(4)ArC(3)H), 115.4 (C(5)), 121.3 (C(5)HetArC(7)), 123.1 (C(5)HetArC(4)), 125.5 (C(5)HetArC(6)), 126.2 (C(5)HetArC(5)), 128.2 (2×ArCH), 128.9 (2×ArCH), 130.1 (2×ArCH), 130.8 (C(6)PhC(4)H), 131.6 (C(4)ArC(1)), 131.9 (C(6)PhC(1)), 138.2 (C(5)HetArC), 152.2 (C(5)HetArC), 154.2 (C(6)), 159.1 (C(4)ArC(4)), 164.4 (C(5)HetArC=N), 166.8 (C(2)O); *m/z* (NSI<sup>+</sup>) 436 ([M+Na]<sup>+</sup>, 100%), 414 ([M+H]<sup>+</sup>, 90%); HRMS (NSI<sup>+</sup>) C<sub>25</sub>H<sub>20</sub>O<sub>3</sub>NS ([M+H]<sup>+</sup>) requires 414.1158, found 414.1156 (-0.6 ppm).

## Mechanistic Investigations

### (*E*)-3-Oxo-1,3-diphenylprop-1-enyl cinnamate (**50**)

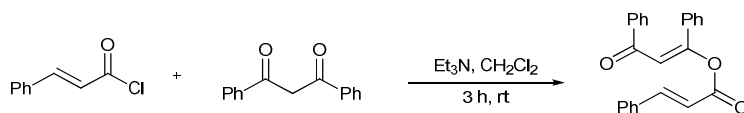

*Trans*-cinnamoyl chloride (1.99 g, 12.0 mmol) was added to a solution of 1,3-diphenylpropane-1,3-dione (2.20 g, 10.0 mmol) in CH<sub>2</sub>Cl<sub>2</sub> (15 mL) at room temperature. The solution was stirred for 3 h and then quenched with 0.1 M HCl (10 mL). The aqueous was extracted with CH<sub>2</sub>Cl<sub>2</sub> (2 x 20 mL) and the combined organics were washed with saturated NaHCO<sub>3</sub> (10 mL) solution and H<sub>2</sub>O (10 mL), dried over anhydrous MgSO<sub>4</sub>, filtered and concentrated under reduced pressure. The residue was purified by column chromatography (20% Et<sub>2</sub>O/petrol) to afford the *ester* **50** as a yellow solid (580 mg, 16%); mp 111-112 °C;  $\nu_{\max}$  (film) 1722 (C=O), 1664 (C=O), 1635, 1600, 1211;  $\delta_{\text{H}}$  (400 MHz, CDCl<sub>3</sub>) 6.73 (1H, d, *J* 16, PhCH=CHCO), 7.33 (1H, s, C(2)H), 7.42-7.58 (9H, m, ArH), 7.60 (2H, dd, *J* 6.6, 3.0 ArH), 7.74-7.80 (2H, m, ArH), 7.90 (1H, d, *J* 16.0, PhCH=CHCO), 7.98-8.05 (2H, m, ArH);  $\delta_{\text{C}}$  (100 MHz, CDCl<sub>3</sub>) 109.8 (C(2)H), 116.6 (PhCH=CH), 126.1 (2×ArCH), 128.2 (2×ArCH), 128.4 (2×ArCH), 128.5 (2×ArCH), 128.8 (3×ArCH), 130.7 (2×ArCH), 131.0 (ArCH), 132.7 (ArCH), 133.9 (ArC), 134.0 (ArC), 138.6 (ArC), 147.2 (PhCH=CH), 156.9 (CO<sub>2</sub>), 163.8 (C(3)), 188.4 (C(1)); HRMS (ESI<sup>+</sup>) C<sub>24</sub>H<sub>18</sub>O<sub>3</sub>Na ([M+Na]<sup>+</sup>), found 377.1138, requires 377.1138.

### *N*-Cinnamoyl-(11*S*,12*R*)-11-phenyl-12-(propan-2-yl)-8-thia-1,10-diazatricyclo[7.4.0.0<sup>2,7</sup>]trideca-2,4,6,9-tetraene (**52**)

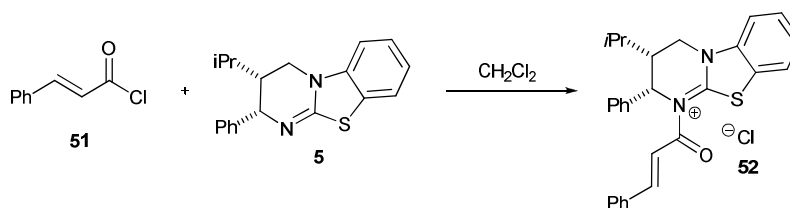

*Trans*-cinnamoyl chloride (100 mg, 0.60 mmol) and HBTM 2.1 (185 mg, 0.60 mmol) were stirred in CH<sub>2</sub>Cl<sub>2</sub> (2 mL) under N<sub>2</sub> at room temperature for 1 h. A white solid precipitate was formed and collected *via* vacuum filtration to afford the *acyl ammonium* **52** (205 mg, 72%); mp 248-250 °C (decomposition);  $[\alpha]_{\text{D}}^{20}$  +53.0 (*c* 1.0, CHCl<sub>3</sub>);  $\nu_{\max}$  (film) 2962 (C-H), 1678 (C=O), 1604, 1531, 1284;  $\delta_{\text{H}}$  (400 MHz, CDCl<sub>3</sub>) 0.90 (3H, d, *J* 6.8, CH<sub>3</sub>), 1.42 (3H, d, *J* 6.8, CH<sub>3</sub>), 1.89 (1H, h, *J* 6.8, CH<sub>2</sub>), 3.03 (1H, ddt, *J* 12.3, 8.6, 4.6, CHCH<sub>2</sub>), 3.98 (1H, t, *J* 13.0, CHPh), 5.01 (1H, dd, *J* 13.4, 4.5, CH<sub>2</sub>), 6.68 (1H, d, *J* 4.5, CH<sup>*i*</sup>Pr), 7.19-7.22 (2H, m, ArH), 7.33-7.43 (6H, m, ArH), 7.51 (1H, d, *J* 15.2, PhCH=CH), 7.62 (2H, dd, *J* 7.9, 1.7, ArH), 7.67 (1H, d, *J* 7.5, ArH), 7.81 (1H, ddd, *J* 8.5, 7.4, 1.2,

ArH), 7.90 (1H, d, 15.2, PhCH=CH), 8.00-8.08 (1H, m, ArH), 8.26 (1H, d,  $J$  8.4, ArH);  $\delta_C$  (100 MHz, CDCl<sub>3</sub>) 19.3 (CH<sub>3</sub>), 22.3 (CH<sub>3</sub>), 26.7 (CH), 40.4 (CH), 44.9 (CH<sub>2</sub>), 61.7 (CH), 113.9 (CH), 115.1 (CH) 122.9 (CH), 126.2 (C), 127.0 (2×CH), 127.8 (CH)), 129.1 (2×CH), 129.4 (2×CH), 129.6 (CH), 129.7 (CH), 129.8 (2×CH), 131.8 (CH), 133.7 (C), 135.1 (C), 136.5 (C), 151.5 (CH), 160.6 (C), 166.9 (C); HRMS (ESI<sup>+</sup>) C<sub>28</sub>H<sub>27</sub>ON<sub>2</sub>S ([M<sup>+</sup>]), found 439.1832, requires 439.1832.

### (3S)-Methyl 4-benzoyl-5-oxo-3,5-diphenylpentanoate (6)

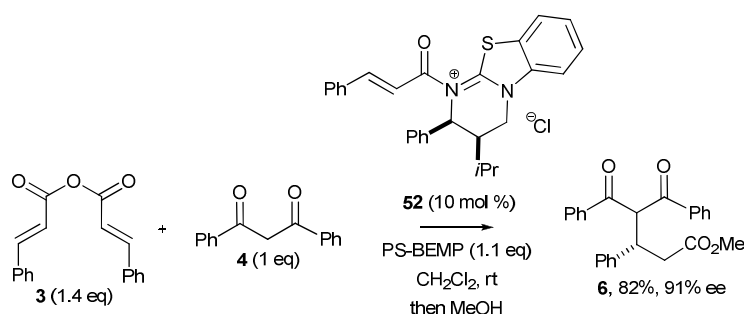

The title compound was prepared according to *General Procedure D* from (*E*)-cinnamic anhydride (278 mg, 1.40 mmol), **52** (34 mg, 0.072 mmol), BEMP (2.0 mmol/g loading, 360 mg, 1.10 mmol) and purified by chromatography (CH<sub>2</sub>Cl<sub>2</sub>→2%EtOAc/CH<sub>2</sub>Cl<sub>2</sub>) to afford the *ester* **6** as a white solid (223 mg, 81%); chiral HPLC analysis, ChiralPak AD-H (20% *i*-PrOH:hexane, flow rate 1.0 mL min<sup>-1</sup>, 220 nm, 30 °C),  $t_R$  major: 11.9 min,  $t_R$  minor: 17.0 min, 91% ee; Data in agreement with compound **6** described on page S12.

### X-ray Crystal Structure

Asymmetric unit in the crystal structure of **52** (crystals grown *via* vapour diffusion [CH<sub>2</sub>Cl<sub>2</sub>/hexane]), from single crystal X-ray diffraction at T=93 K. Thermal ellipsoids are drawn at the 50% probability level.

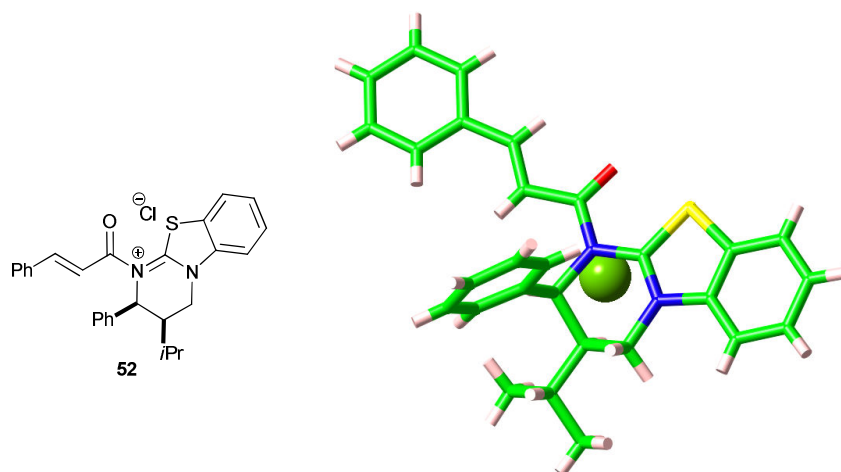

## HPLC Spectra

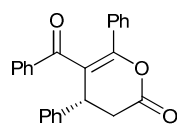

(2)

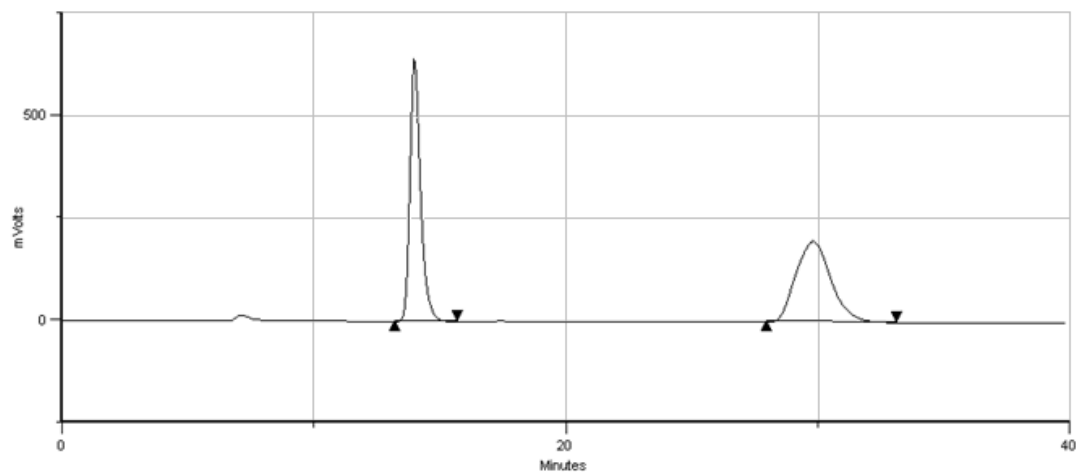

| Peak Name | R. Time | Area        | Area % |
|-----------|---------|-------------|--------|
| *1        | 14.00   | 31202176.00 | 49.36  |
| *2        | 29.84   | 32012378.00 | 50.64  |

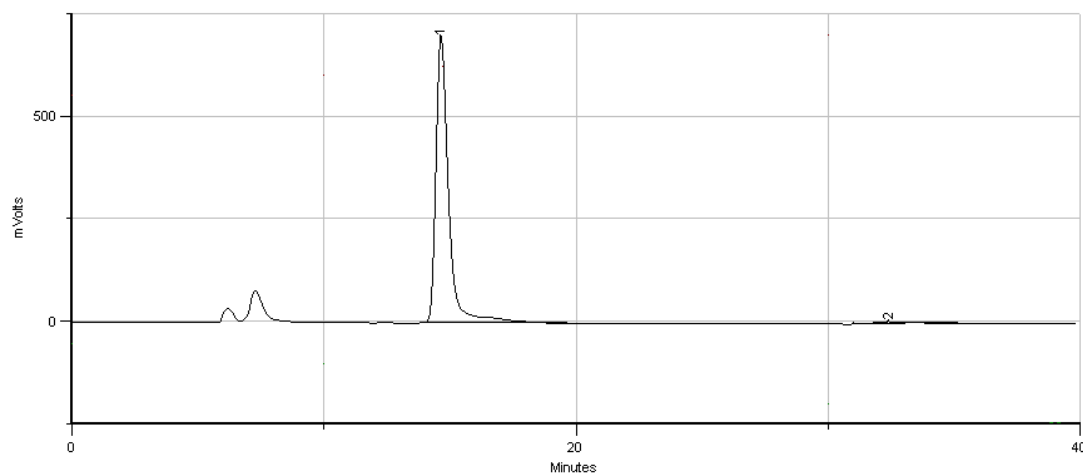

| Peak Name | R. Time | Area        | Area % |
|-----------|---------|-------------|--------|
| *1        | 14.65   | 41276768.00 | 97.46  |
| *2        | 32.41   | 1074293.62  | 2.54   |

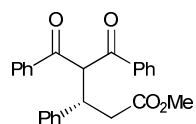

(6)

mAU

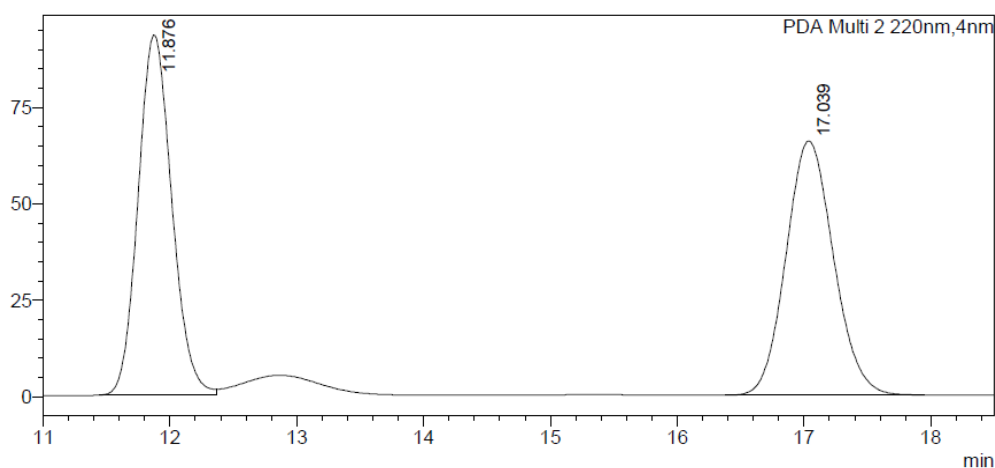

<Peak Table>

PDA Ch2 220nm

| Peak# | Ret. Time | Area    | Area%   |
|-------|-----------|---------|---------|
| 1     | 11.876    | 1731954 | 50.165  |
| 2     | 17.039    | 1720589 | 49.835  |
| Total |           | 3452543 | 100.000 |

mAU

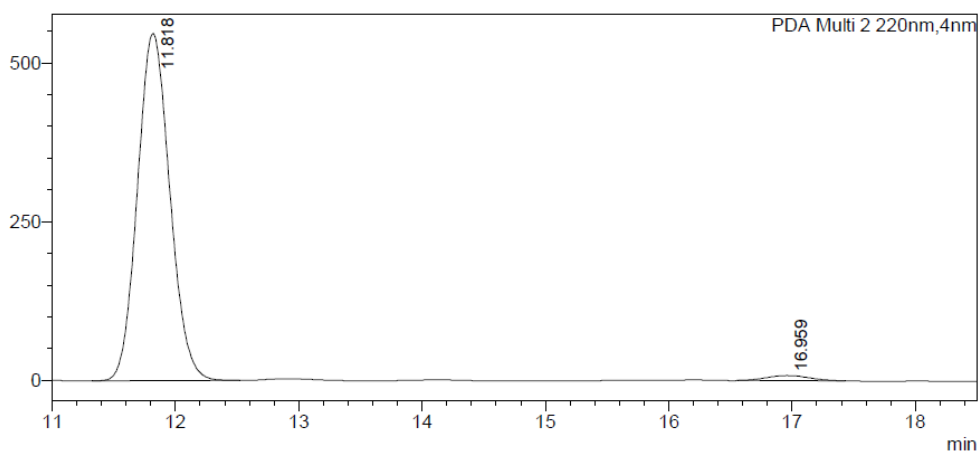

<Peak Table>

PDA Ch2 220nm

| Peak# | Ret. Time | Area     | Area%   |
|-------|-----------|----------|---------|
| 1     | 11.818    | 10008385 | 98.074  |
| 2     | 16.959    | 196584   | 1.926   |
| Total |           | 10204970 | 100.000 |



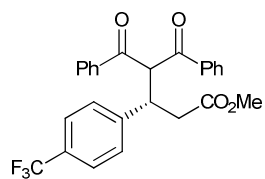

(7)

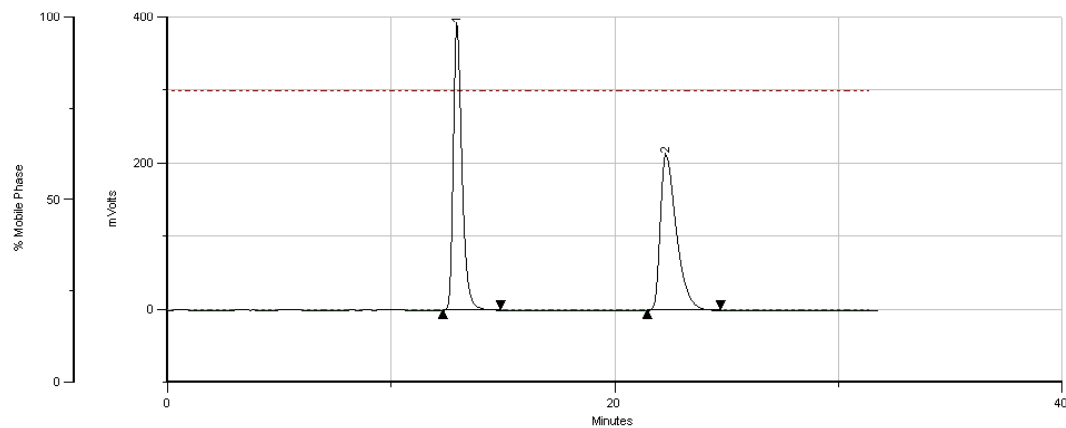

| Peak Name | R. Time | Area        | Area % |
|-----------|---------|-------------|--------|
| *1        | 12.94   | 17643908.00 | 49.91  |
| 2         | 22.30   | 17705074.00 | 50.09  |

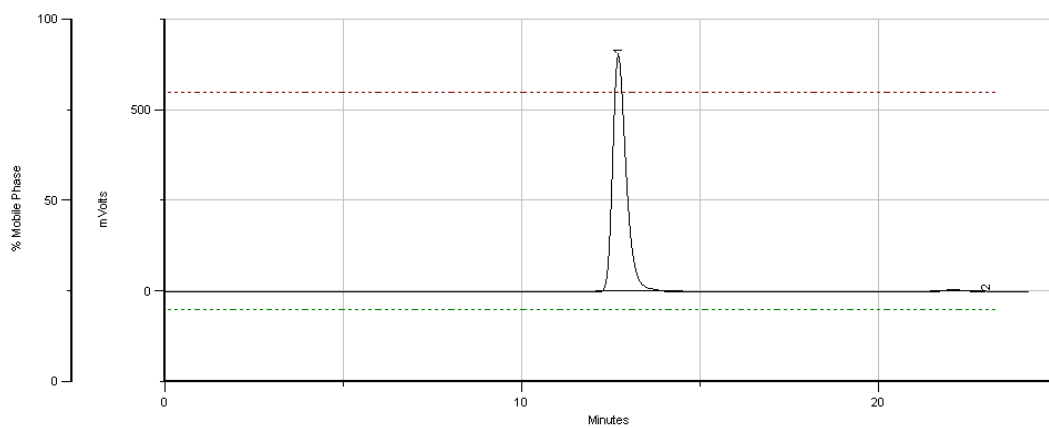

| Peak Name | R. Time | Area        | Area % |
|-----------|---------|-------------|--------|
| *1        | 12.71   | 28851270.00 | 98.35  |
| *2        | 22.09   | 483435.59   | 1.65   |

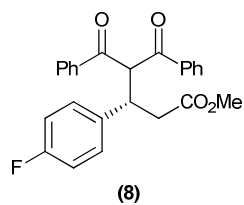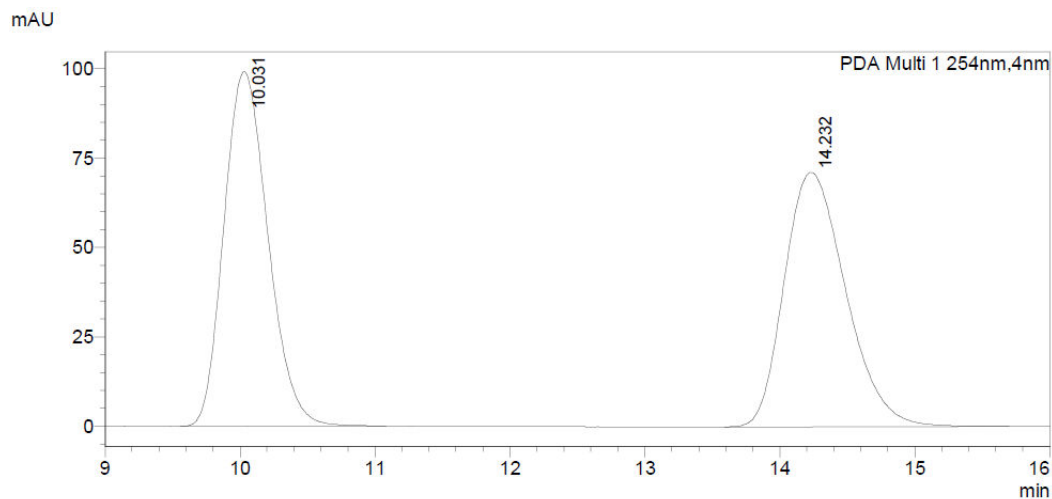

<Peak Table>

PDA Ch1 254nm

| Peak# | Ret. Time | Area    | Area%   |
|-------|-----------|---------|---------|
| 1     | 10.031    | 2250282 | 49.983  |
| 2     | 14.232    | 2251852 | 50.017  |
| Total |           | 4502134 | 100.000 |

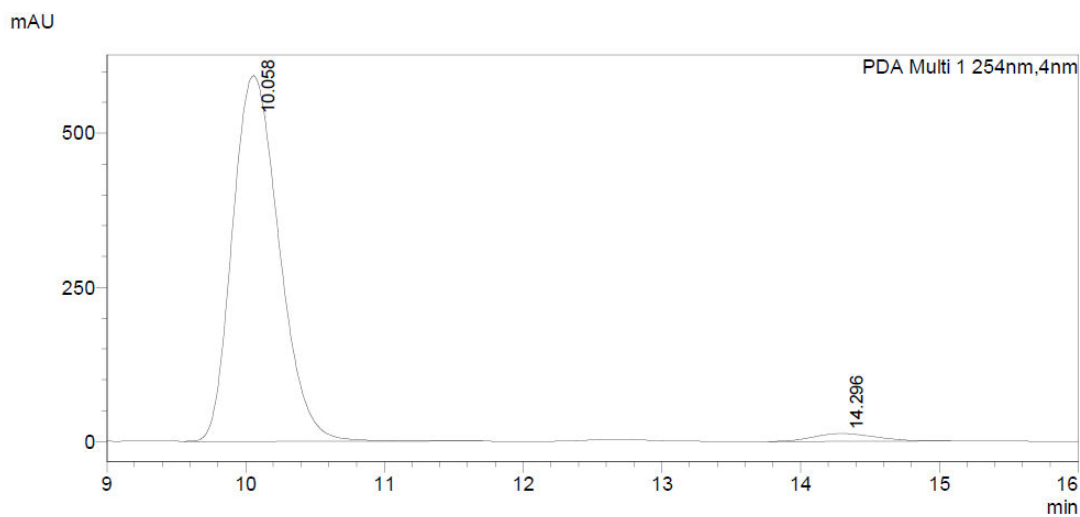

<Peak Table>

PDA Ch1 254nm

| Peak# | Ret. Time | Area     | Area%   |
|-------|-----------|----------|---------|
| 1     | 10.058    | 13876980 | 97.274  |
| 2     | 14.296    | 388920   | 2.726   |
| Total |           | 14265900 | 100.000 |

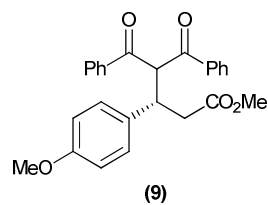

mAU

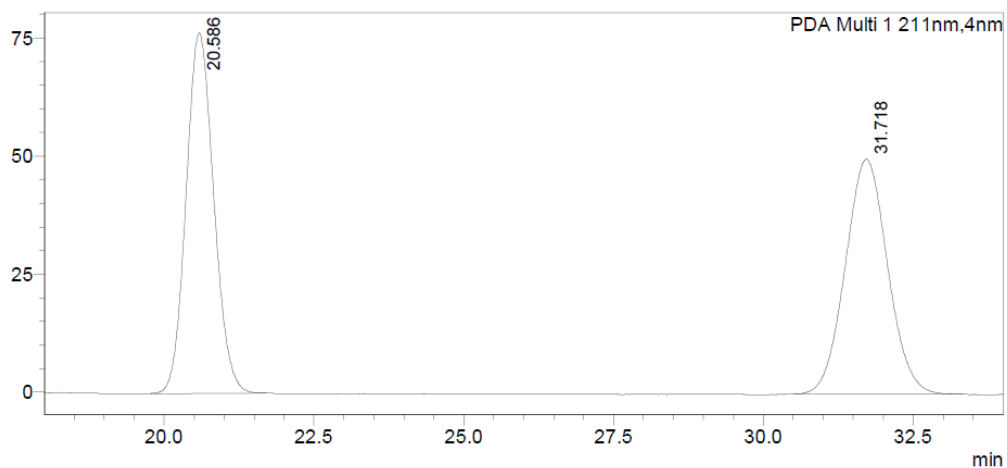

<Peak Table>

PDA Ch1 211nm

| Peak# | Ret. Time | Area    | Area%   |
|-------|-----------|---------|---------|
| 1     | 20.586    | 2451994 | 50.002  |
| 2     | 31.718    | 2451803 | 49.998  |
| Total |           | 4903798 | 100.000 |

mAU

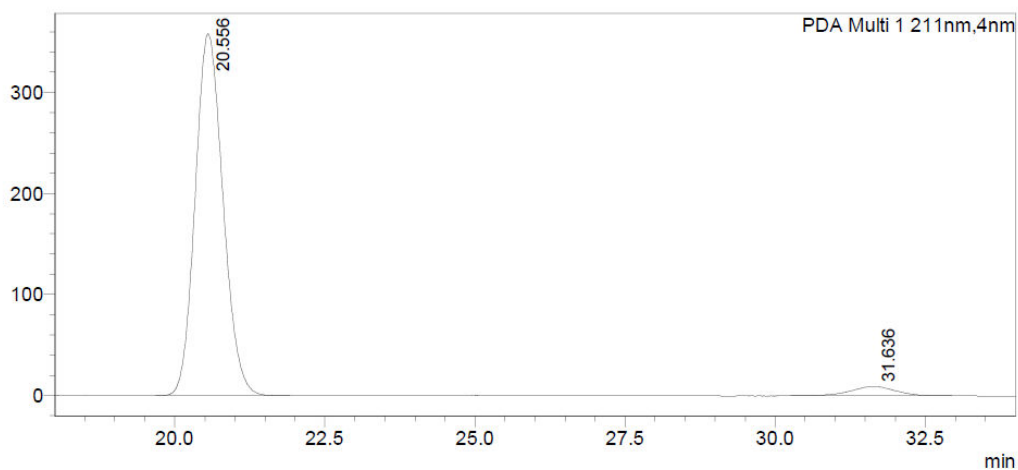

<Peak Table>

PDA Ch1 211nm

| Peak# | Ret. Time | Area     | Area%   |
|-------|-----------|----------|---------|
| 1     | 20.556    | 11574590 | 95.939  |
| 2     | 31.636    | 489913   | 4.061   |
| Total |           | 12064504 | 100.000 |

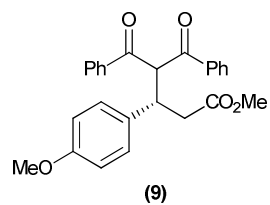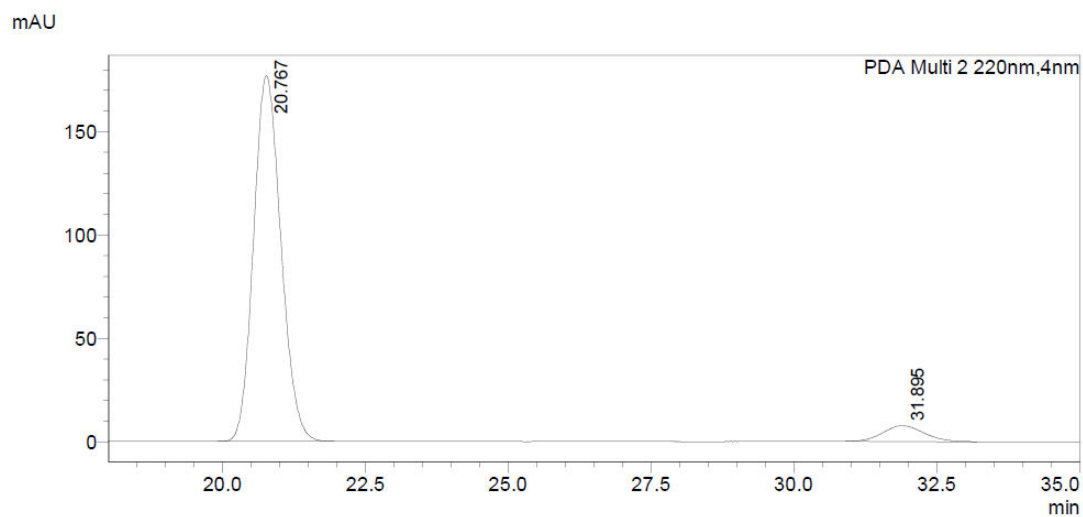

<Peak Table>

PDA Ch2 220nm

| Peak# | Ret. Time | Area    | Area%   |
|-------|-----------|---------|---------|
| 1     | 20.767    | 5895859 | 93.951  |
| 2     | 31.895    | 379606  | 6.049   |
| Total |           | 6275465 | 100.000 |

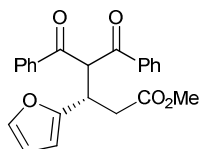

(10)

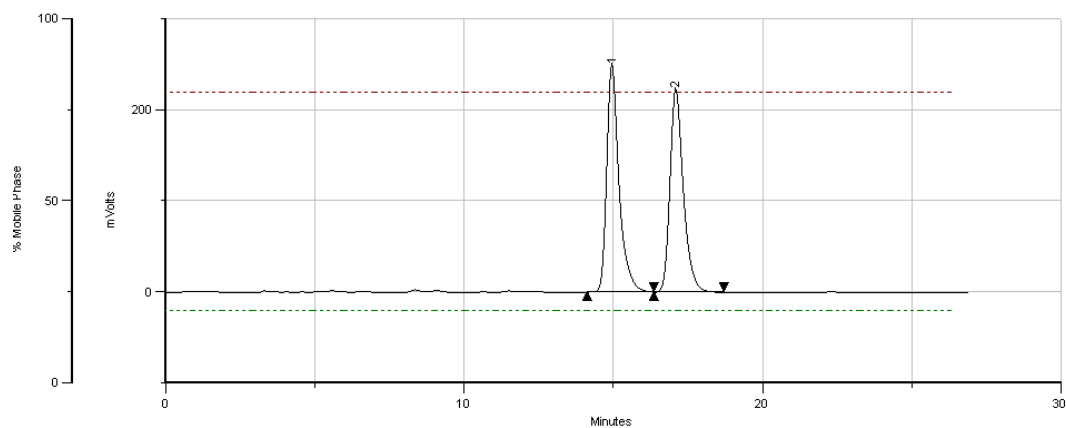

| Peak Name | R. Time | Area        | Area % |
|-----------|---------|-------------|--------|
| *1        | 14.95   | 11949417.00 | 50.83  |
| 2         | 17.09   | 11557860.00 | 49.17  |

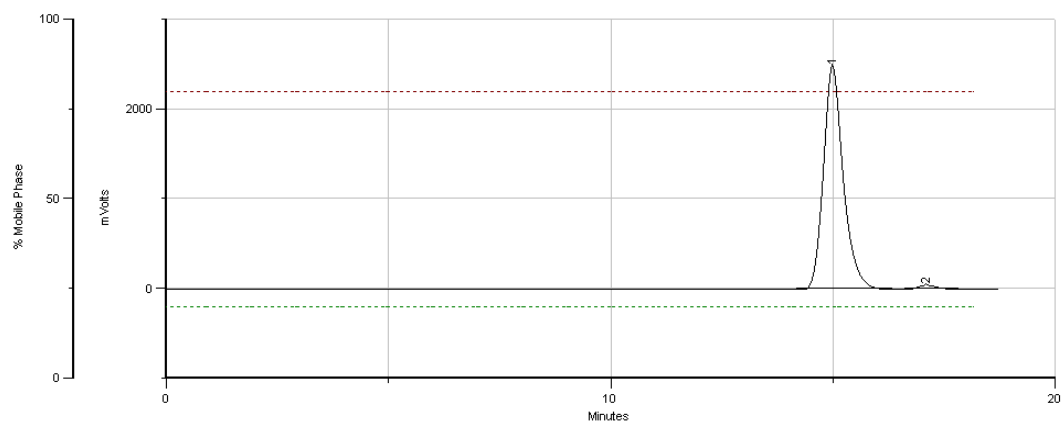

| Peak Name | R. Time | Area        | Area % |
|-----------|---------|-------------|--------|
| *1        | 14.99   | 29129056.00 | 98.11  |
| *2        | 17.10   | 2483672.50  | 1.89   |

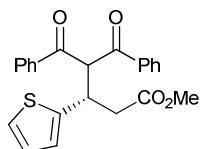

(11)

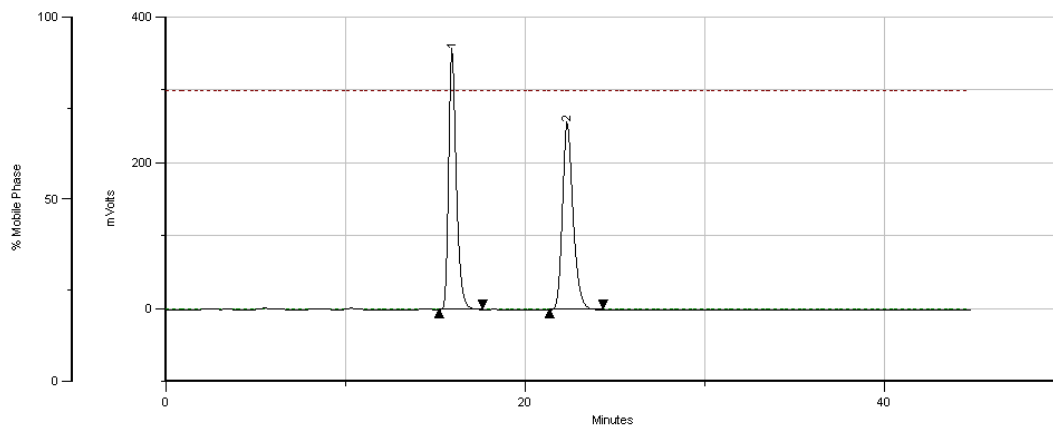

| Peak Name | R. Time | Area        | Area % |
|-----------|---------|-------------|--------|
| *1        | 15.92   | 17620036.00 | 50.05  |
| 2         | 22.34   | 17586184.00 | 49.95  |

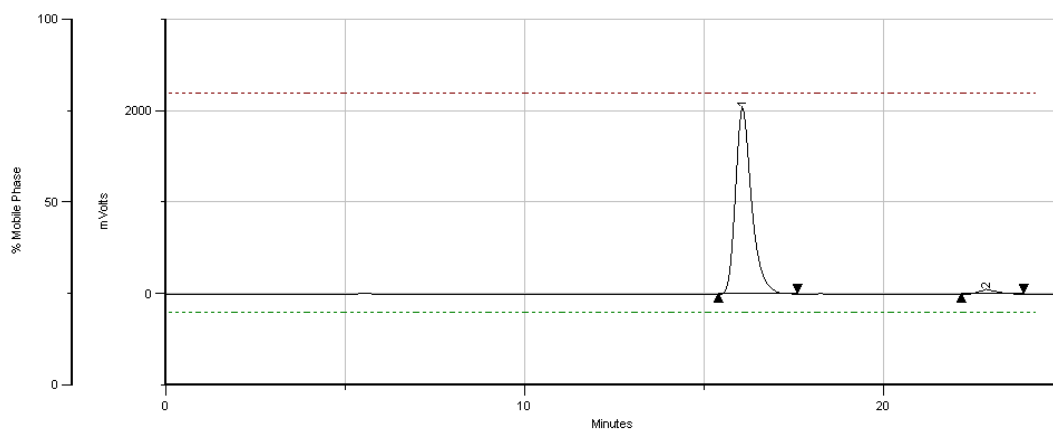

| Peak Name | R. Time | Area        | Area % |
|-----------|---------|-------------|--------|
| *1        | 16.07   | 06536624.00 | 96.82  |
| *2        | 22.88   | 3494136.00  | 3.18   |

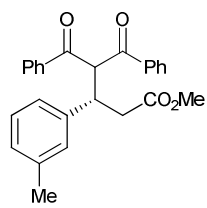

mAU

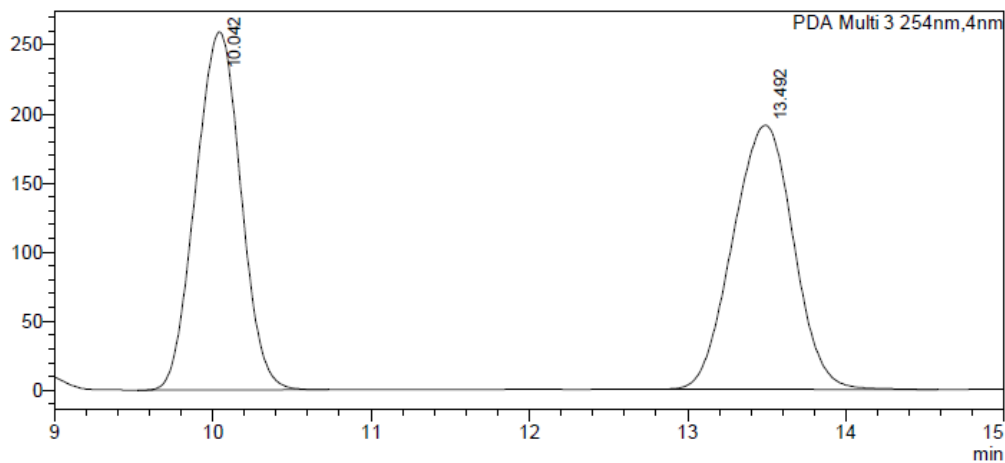

<Peak Table>

PDA Ch3 254nm

| Peak# | Ret. Time | Area     | Area%   |
|-------|-----------|----------|---------|
| 1     | 10.042    | 5151322  | 50.227  |
| 2     | 13.492    | 5104838  | 49.773  |
| Total |           | 10256160 | 100.000 |

mAU

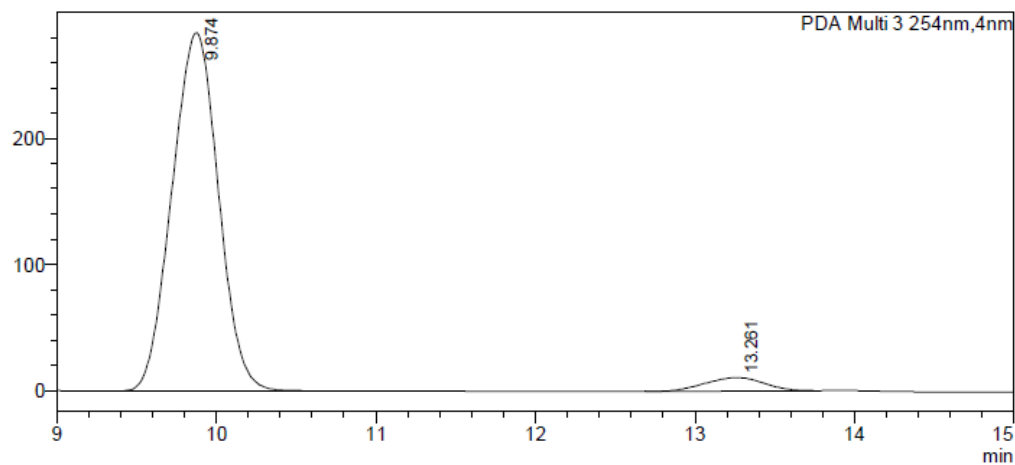

<Peak Table>

PDA Ch3 254nm

| Peak# | Ret. Time | Area    | Area%   |
|-------|-----------|---------|---------|
| 1     | 9.874     | 5761508 | 95.469  |
| 2     | 13.261    | 273425  | 4.531   |
| Total |           | 6034932 | 100.000 |

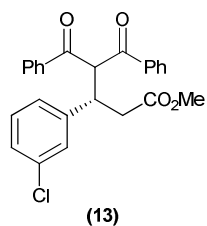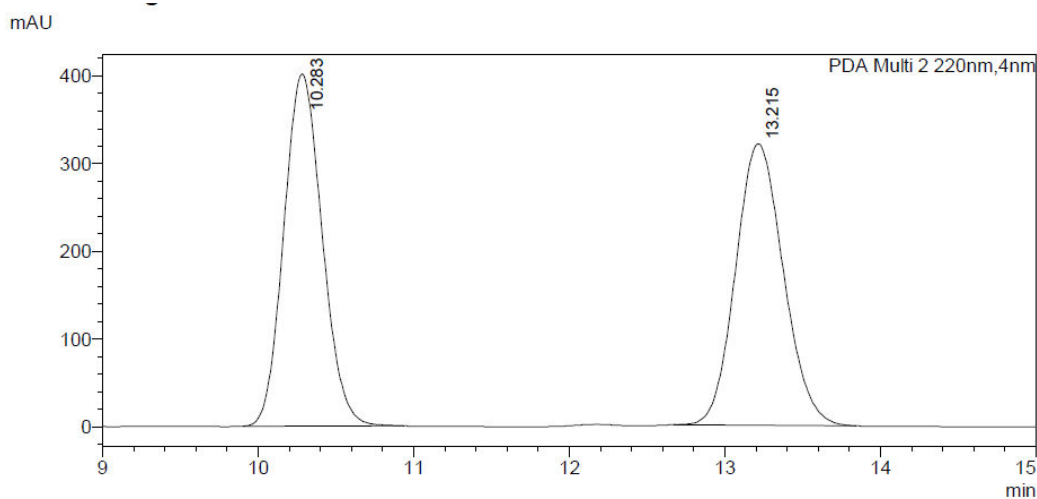

<Peak Table>

| PDA Ch2 220nm |           |          |         |
|---------------|-----------|----------|---------|
| Peak#         | Ret. Time | Area     | Area%   |
| 1             | 10.283    | 6883624  | 50.054  |
| 2             | 13.215    | 6868682  | 49.946  |
| Total         |           | 13752306 | 100.000 |

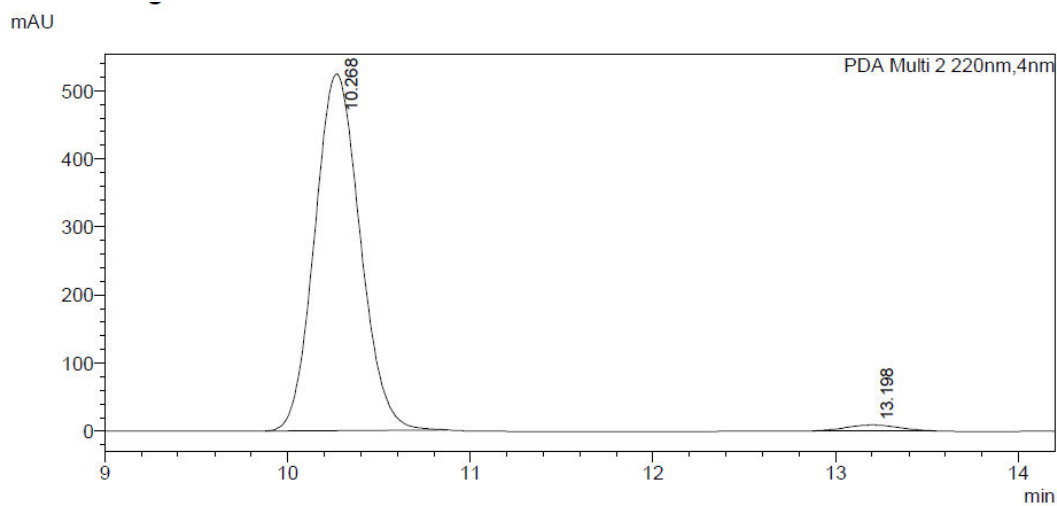

<Peak Table>

| PDA Ch2 220nm |           |         |         |
|---------------|-----------|---------|---------|
| Peak#         | Ret. Time | Area    | Area%   |
| 1             | 10.268    | 9048463 | 98.140  |
| 2             | 13.198    | 171455  | 1.860   |
| Total         |           | 9219918 | 100.000 |



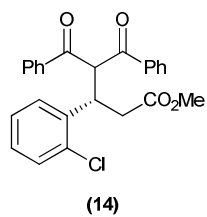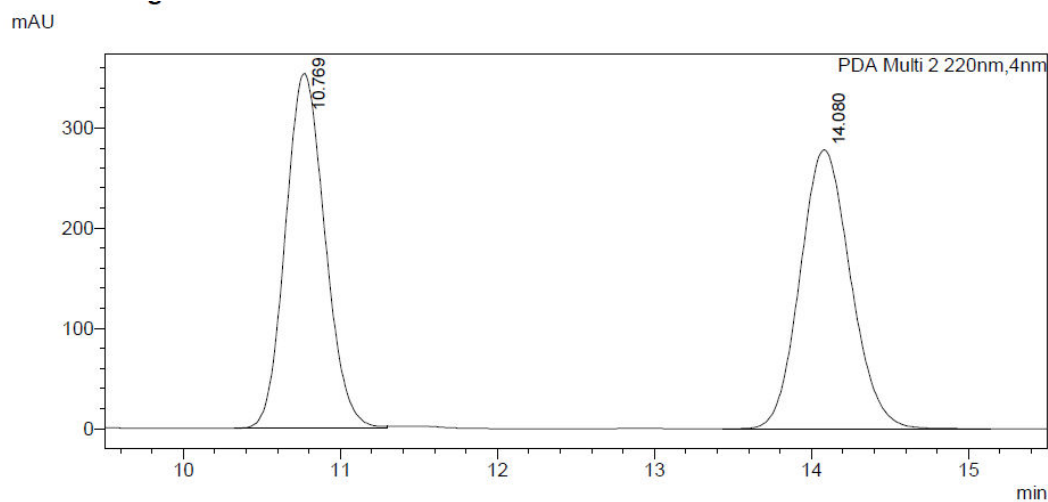

<Peak Table>

| Peak# | Ret. Time | Area     | Area%   |
|-------|-----------|----------|---------|
| 1     | 10.769    | 6199114  | 49.945  |
| 2     | 14.080    | 6212775  | 50.055  |
| Total |           | 12411890 | 100.000 |

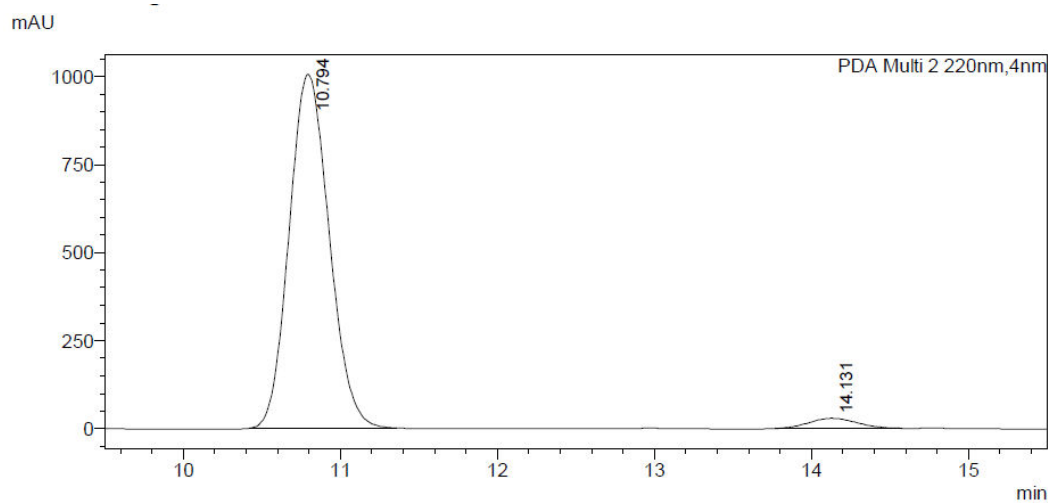

<Peak Table>

| Peak# | Ret. Time | Area     | Area%   |
|-------|-----------|----------|---------|
| 1     | 10.794    | 17850858 | 96.705  |
| 2     | 14.131    | 608289   | 3.295   |
| Total |           | 18459147 | 100.000 |

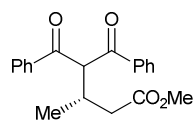

(15)

mAU

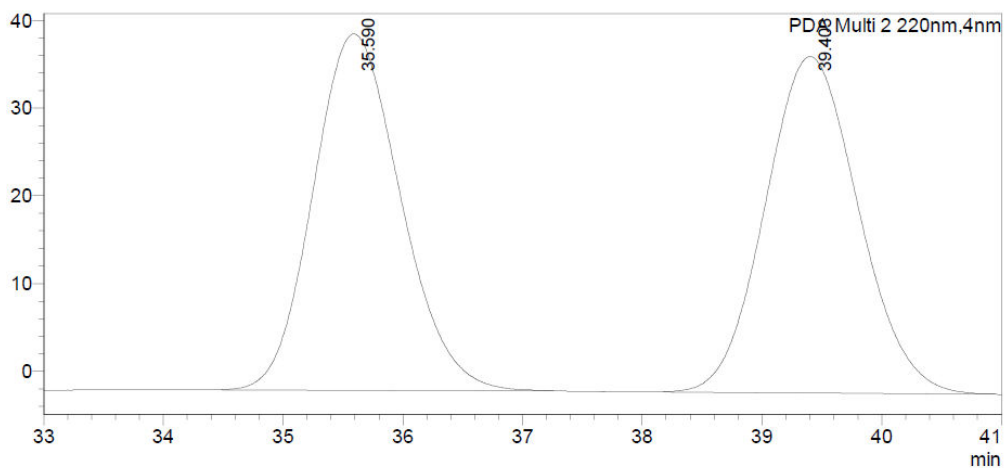

<Peak Table>

PDA Ch2 220nm

| Peak# | Ret. Time | Area    | Area%   |
|-------|-----------|---------|---------|
| 1     | 35.590    | 2061526 | 49.852  |
| 2     | 39.403    | 2073751 | 50.148  |
| Total |           | 4135278 | 100.000 |

mAU

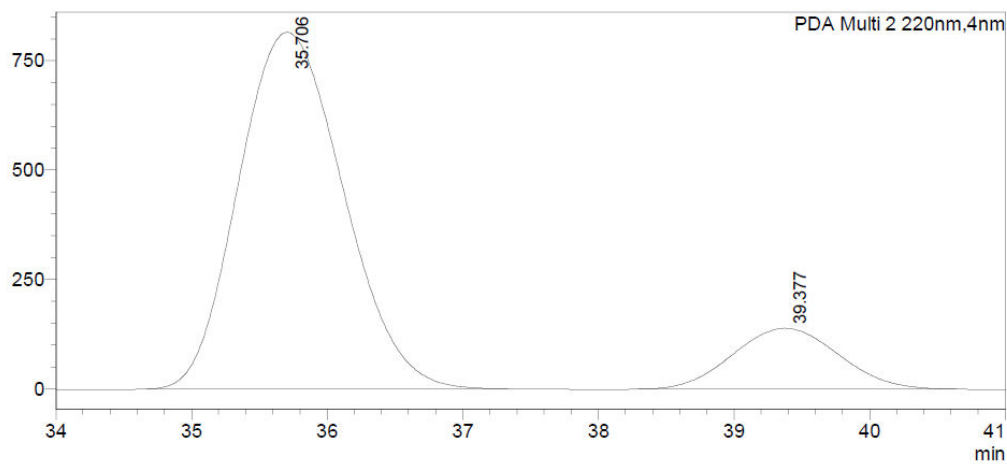

<Peak Table>

PDA Ch2 220nm

| Peak# | Ret. Time | Area     | Area%   |
|-------|-----------|----------|---------|
| 1     | 35.706    | 43751068 | 85.235  |
| 2     | 39.377    | 7578584  | 14.765  |
| Total |           | 51329652 | 100.000 |

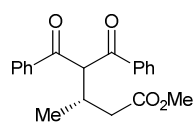

(15)

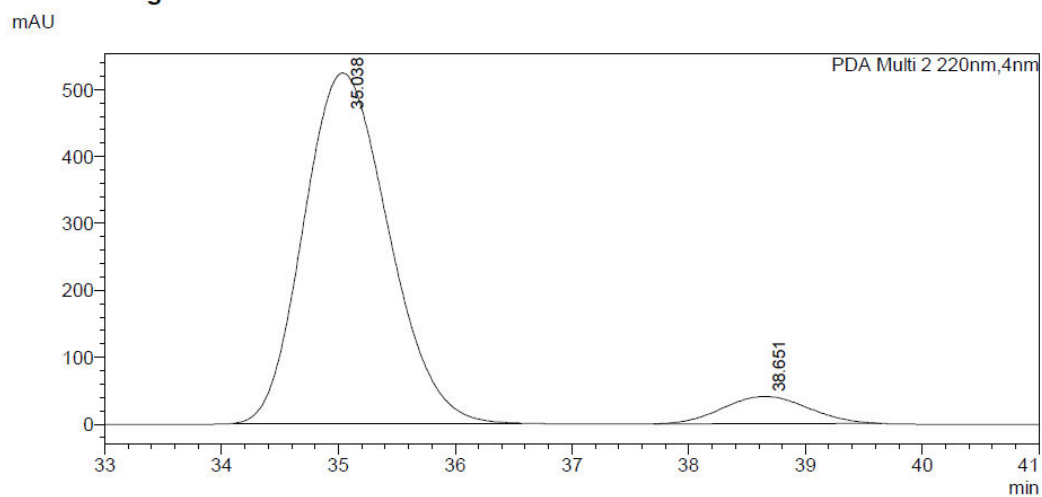

<Peak Table>

PDA Ch2 220nm

| Peak# | Ret. Time | Area     | Area%   |
|-------|-----------|----------|---------|
| 1     | 35.038    | 26427520 | 92.711  |
| 2     | 38.651    | 2077754  | 7.289   |
| Total |           | 28505275 | 100.000 |

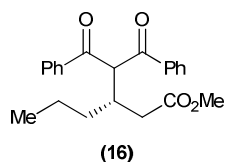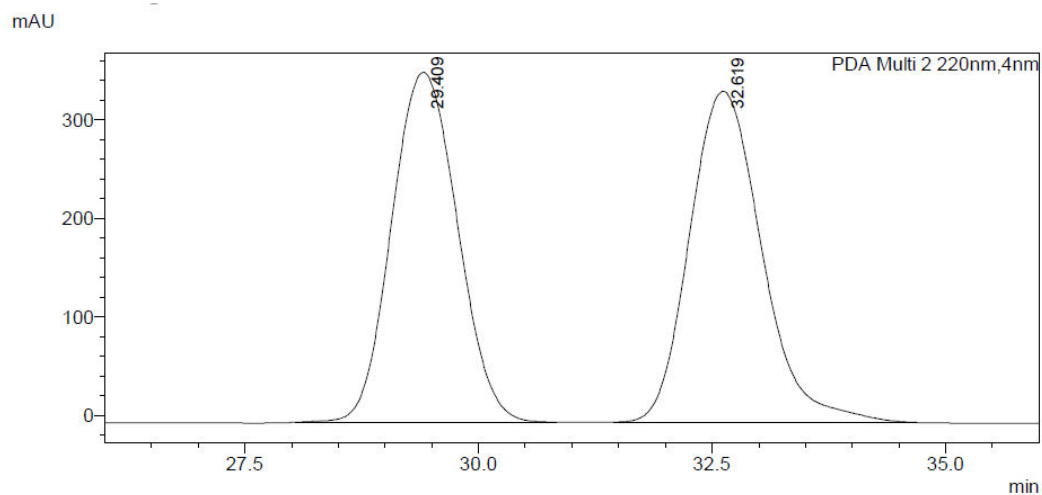

<Peak Table>

| PDA Ch2 220nm |           |          |         |
|---------------|-----------|----------|---------|
| Peak#         | Ret. Time | Area     | Area%   |
| 1             | 29.409    | 17415240 | 49.112  |
| 2             | 32.619    | 18044974 | 50.888  |
| Total         |           | 35460215 | 100.000 |

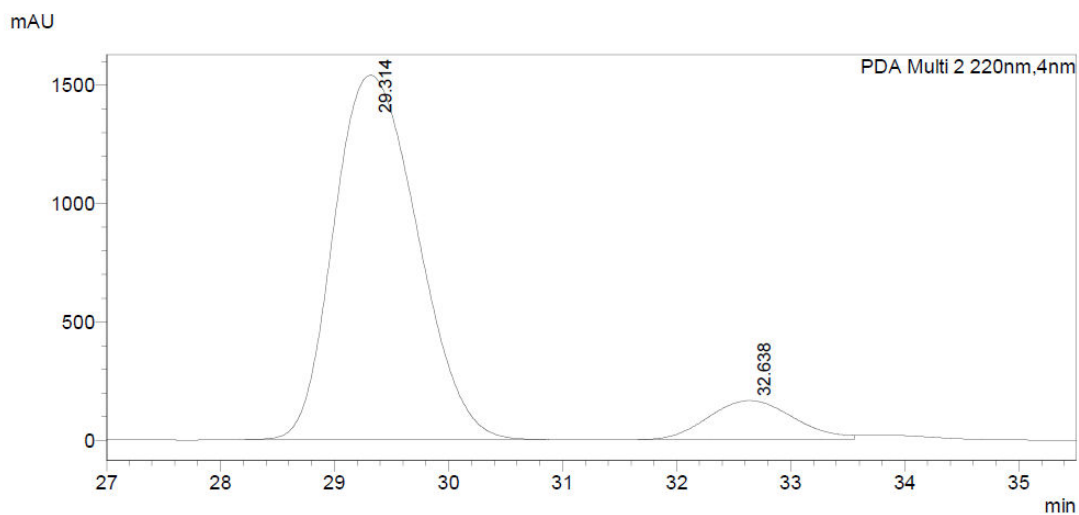

<Peak Table>

| PDA Ch2 220nm |           |          |         |
|---------------|-----------|----------|---------|
| Peak#         | Ret. Time | Area     | Area%   |
| 1             | 29.314    | 78205083 | 90.122  |
| 2             | 32.638    | 8571530  | 9.878   |
| Total         |           | 86776613 | 100.000 |

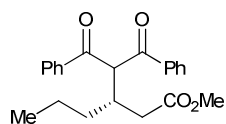

(16)

mAU

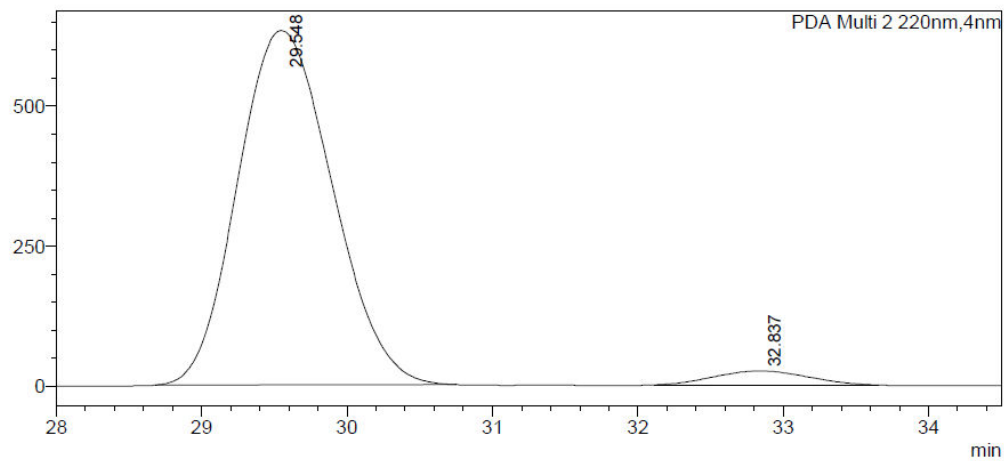

<Peak Table>

PDA Ch2 220nm

| Peak# | Ret. Time | Area     | Area%   |
|-------|-----------|----------|---------|
| 1     | 29.548    | 28642063 | 96.241  |
| 2     | 32.837    | 1118607  | 3.759   |
| Total |           | 29760669 | 100.000 |

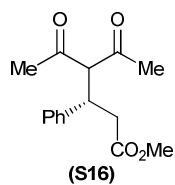

mAU

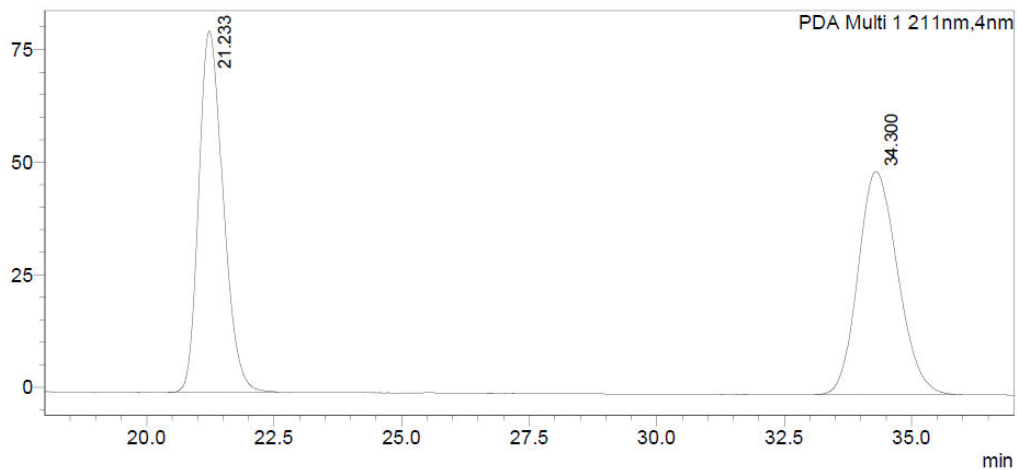

<Peak Table>

PDA Ch1 211nm

| Peak# | Ret. Time | Area    | Area%   |
|-------|-----------|---------|---------|
| 1     | 21.233    | 2676179 | 50.009  |
| 2     | 34.300    | 2675262 | 49.991  |
| Total |           | 5351441 | 100.000 |

mAU

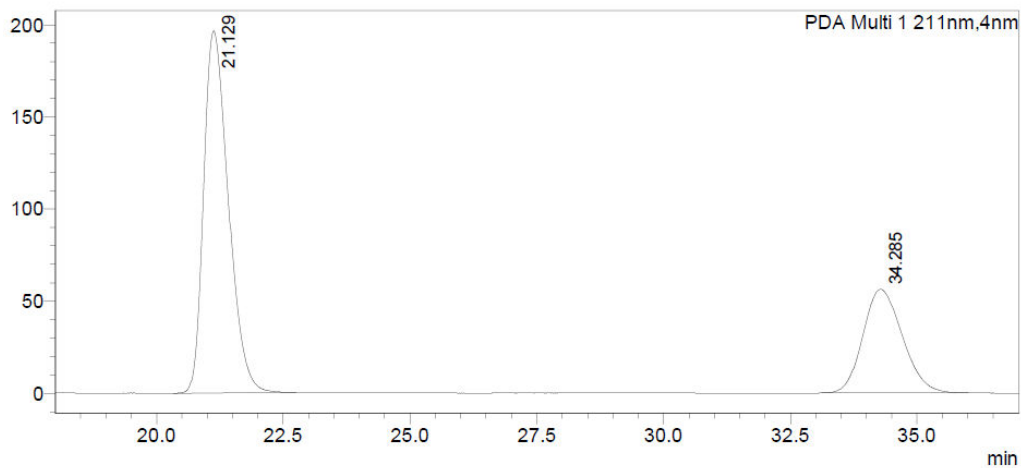

<Peak Table>

PDA Ch1 211nm

| Peak# | Ret. Time | Area    | Height | Area%   |
|-------|-----------|---------|--------|---------|
| 1     | 21.129    | 6702730 | 196461 | 68.738  |
| 2     | 34.285    | 3048374 | 56291  | 31.262  |
| Total |           | 9751104 | 252753 | 100.000 |

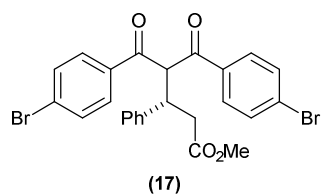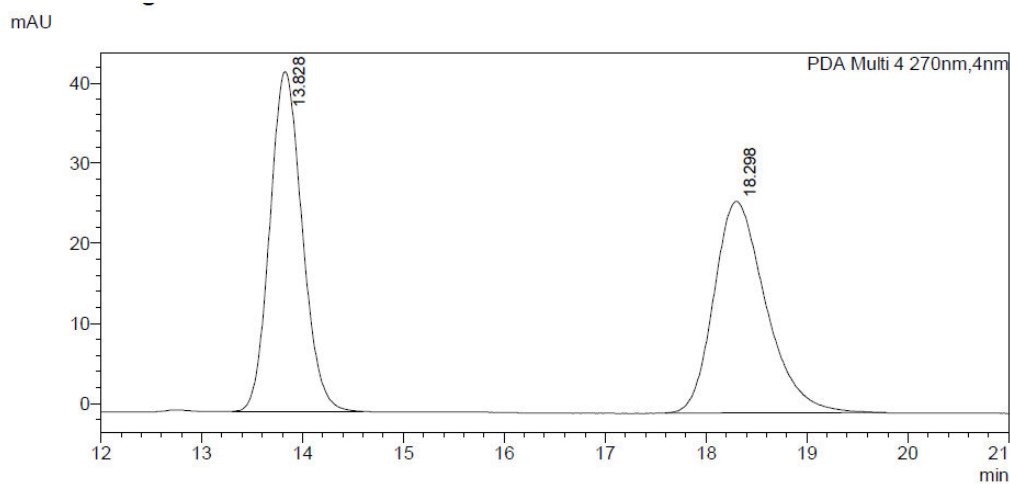

<Peak Table>

PDA Ch4 270nm

| Peak# | Ret. Time | Area    | Area%   |
|-------|-----------|---------|---------|
| 1     | 13.828    | 947314  | 50.031  |
| 2     | 18.298    | 946147  | 49.969  |
| Total |           | 1893461 | 100.000 |

<Chromatogram>

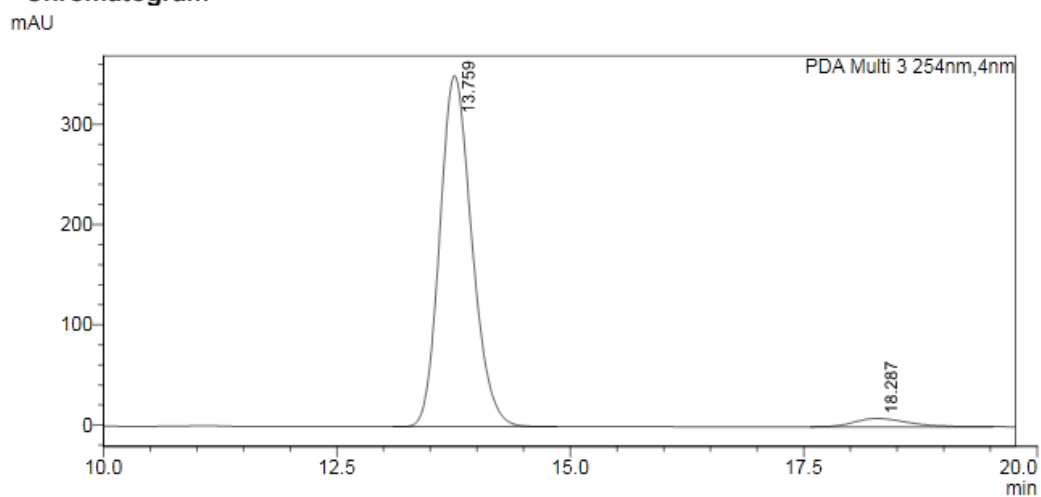

<Peak Table>

PDA Ch3 254nm

| Peak# | Ret. Time | Area    | Area%   |
|-------|-----------|---------|---------|
| 1     | 13.759    | 8373032 | 96.144  |
| 2     | 18.287    | 335833  | 3.856   |
| Total |           | 8708865 | 100.000 |

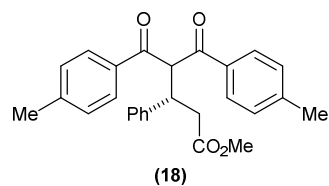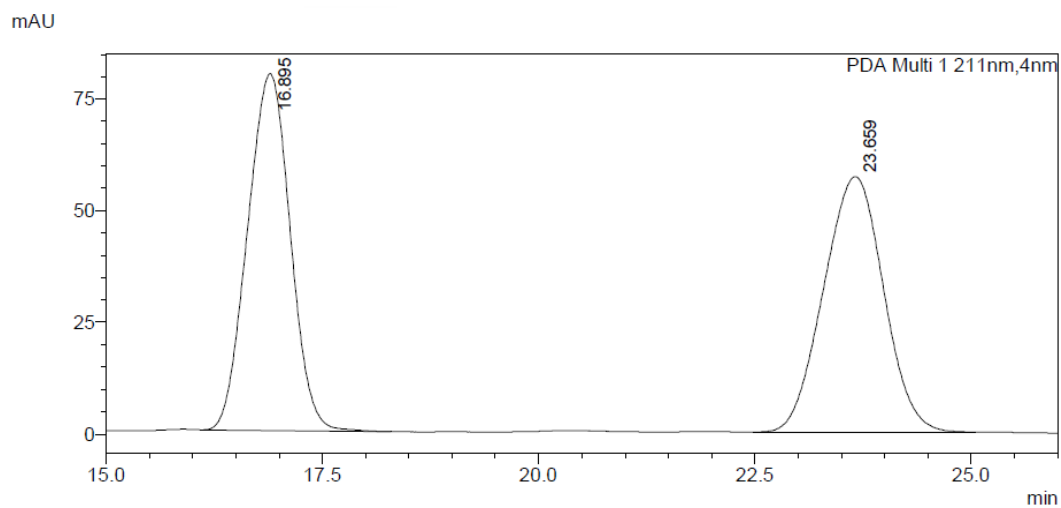

<Peak Table>

| PDA Ch1 211nm |           |         |         |
|---------------|-----------|---------|---------|
| Peak#         | Ret. Time | Area    | Area%   |
| 1             | 16.895    | 2743841 | 49.858  |
| 2             | 23.659    | 2759484 | 50.142  |
| Total         |           | 5503326 | 100.000 |

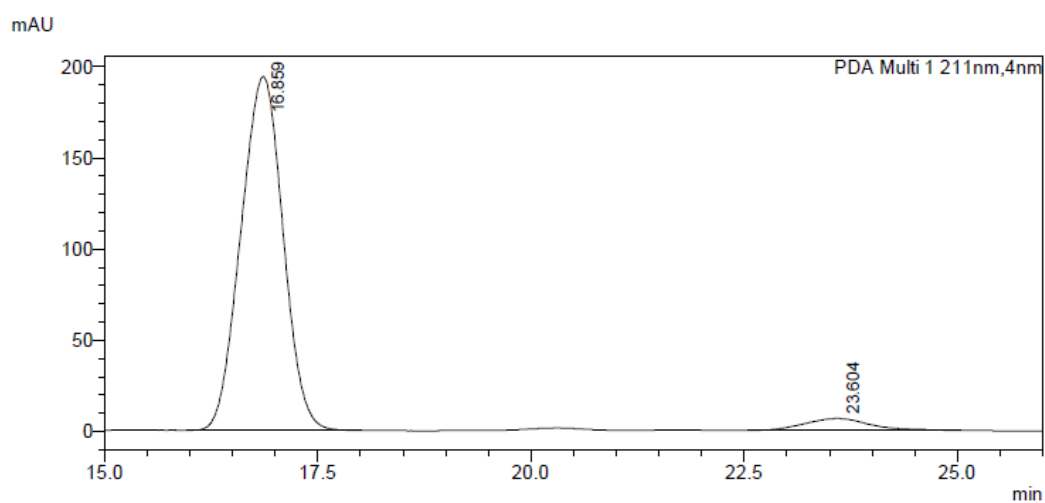

<Peak Table>

| PDA Ch1 211nm |           |         |         |
|---------------|-----------|---------|---------|
| Peak#         | Ret. Time | Area    | Area%   |
| 1             | 16.859    | 6661835 | 95.067  |
| 2             | 23.604    | 345703  | 4.933   |
| Total         |           | 7007537 | 100.000 |



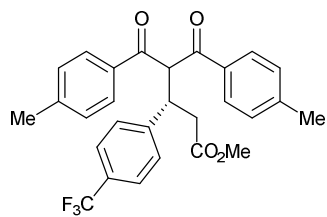

mAU

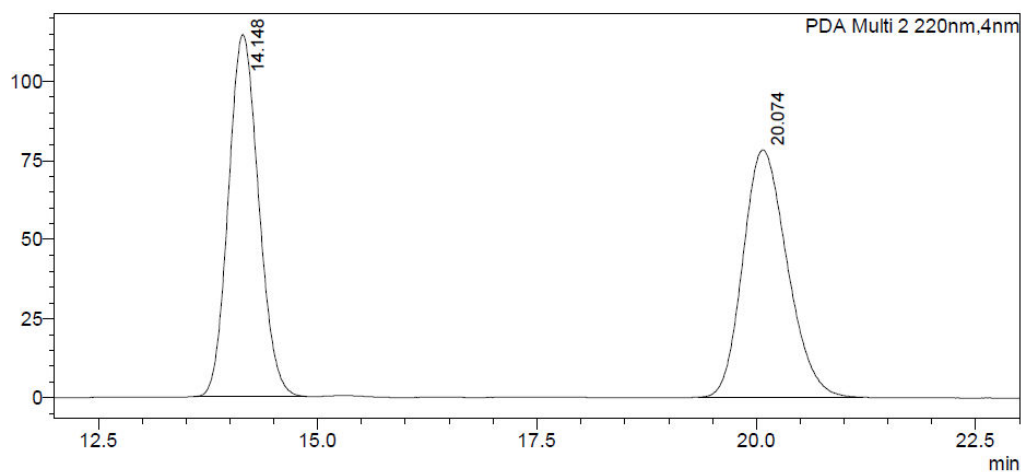

<Peak Table>

PDA Ch2 220nm

| Peak# | Ret. Time | Area    | Area%   |
|-------|-----------|---------|---------|
| 1     | 14.148    | 2736637 | 49.955  |
| 2     | 20.074    | 2741531 | 50.045  |
| Total |           | 5478169 | 100.000 |

mAU

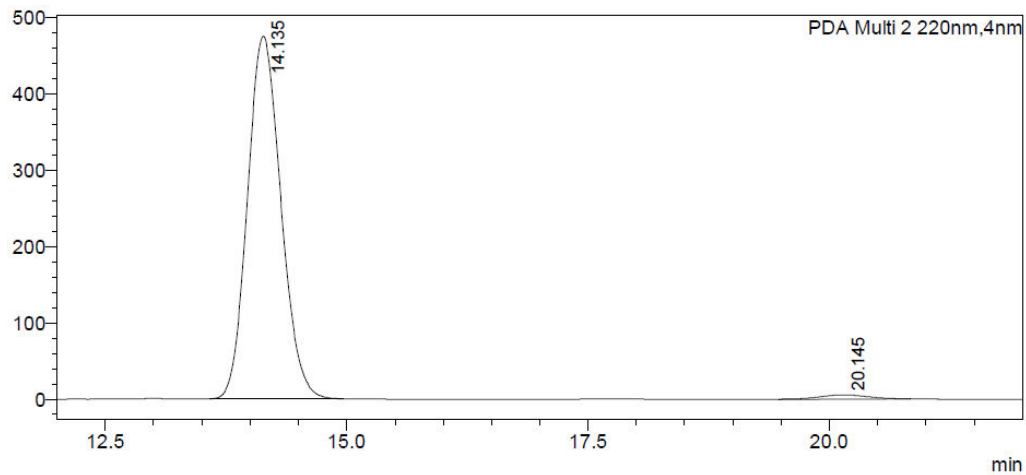

<Peak Table>

PDA Ch2 220nm

| Peak# | Ret. Time | Area     | Area%   |
|-------|-----------|----------|---------|
| 1     | 14.135    | 11442676 | 98.415  |
| 2     | 20.145    | 184244   | 1.585   |
| Total |           | 11626920 | 100.000 |

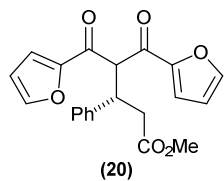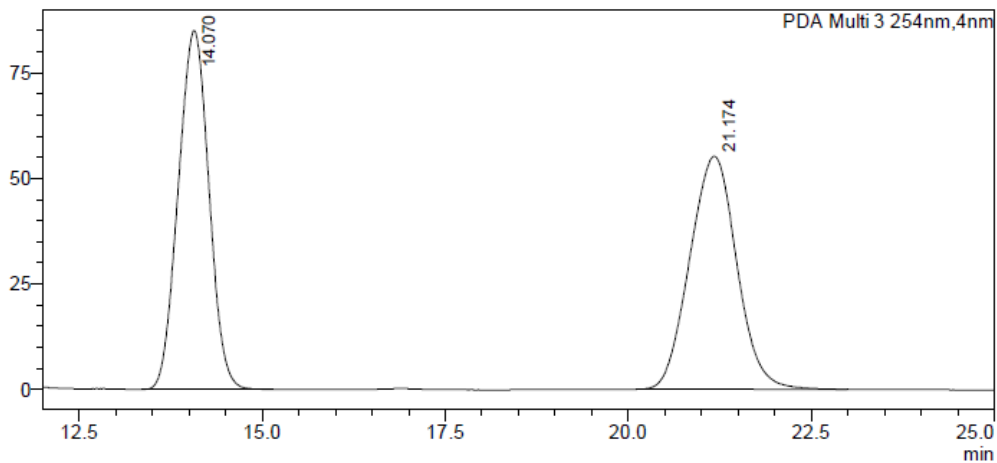

<Peak Table>

PDA Ch3 254nm

| Peak# | Ret. Time | Area    | Area%   |
|-------|-----------|---------|---------|
| 1     | 14.070    | 2482303 | 50.110  |
| 2     | 21.174    | 2471371 | 49.890  |
| Total |           | 4953675 | 100.000 |

mAU

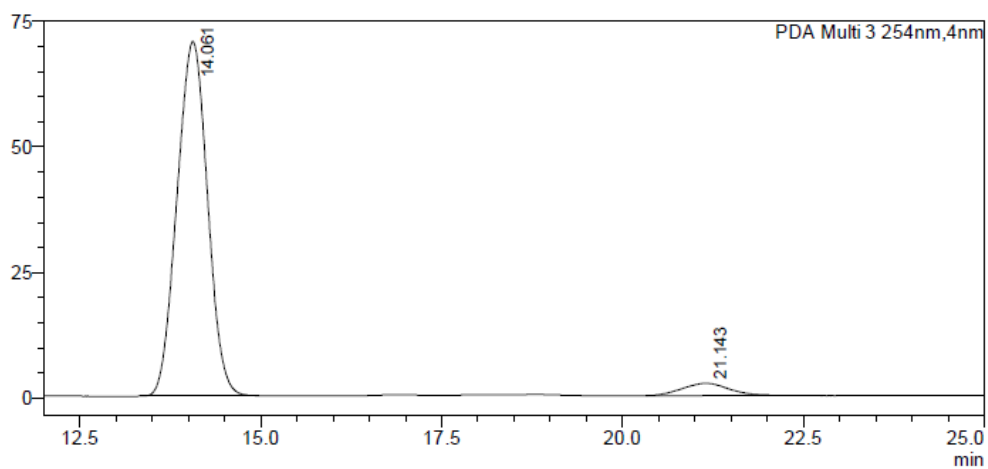

<Peak Table>

PDA Ch3 254nm

| Peak# | Ret. Time | Area    | Area%   |
|-------|-----------|---------|---------|
| 1     | 14.061    | 2069942 | 95.124  |
| 2     | 21.143    | 106095  | 4.876   |
| Total |           | 2176037 | 100.000 |

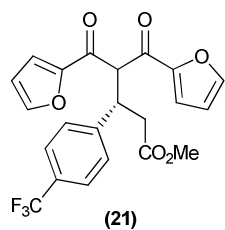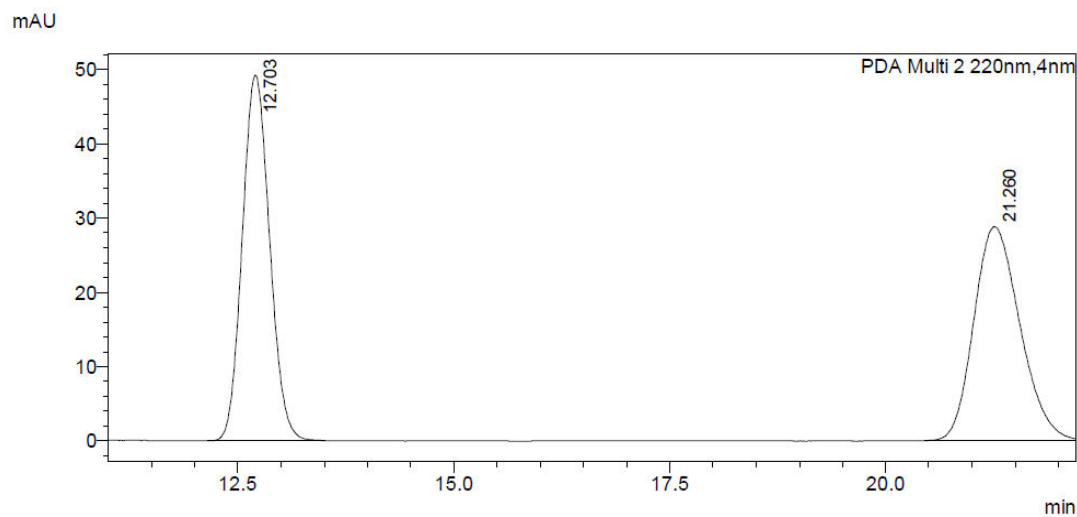

<Peak Table>

PDA Ch2 220nm

| Peak# | Ret. Time | Area    | Area%   |
|-------|-----------|---------|---------|
| 1     | 12.703    | 1084220 | 50.355  |
| 2     | 21.260    | 1068925 | 49.645  |
| Total |           | 2153146 | 100.000 |

mAU

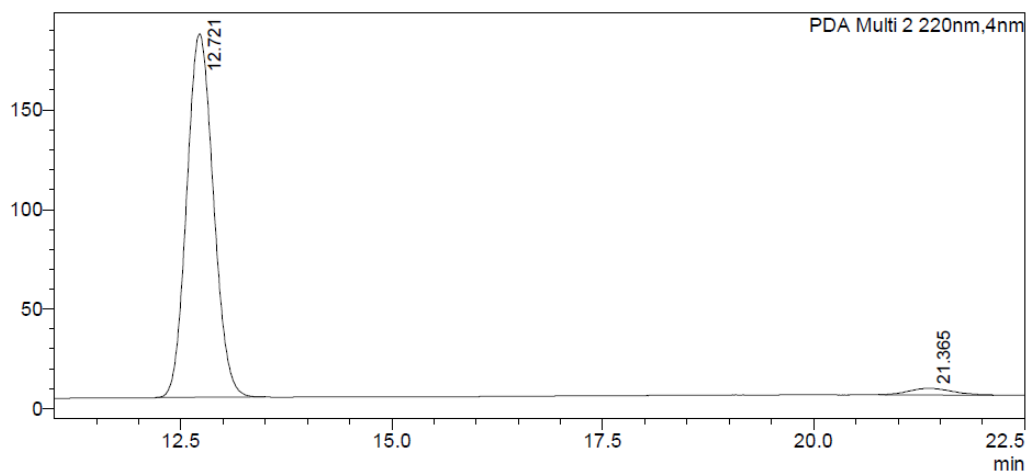

<Peak Table>

PDA Ch2 220nm

| Peak# | Ret. Time | Area    | Area%   |
|-------|-----------|---------|---------|
| 1     | 12.721    | 4019567 | 97.144  |
| 2     | 21.365    | 118183  | 2.856   |
| Total |           | 4137749 | 100.000 |

Supporting Information

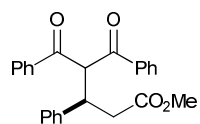

(6)

from *cis*-anhydride

mAU

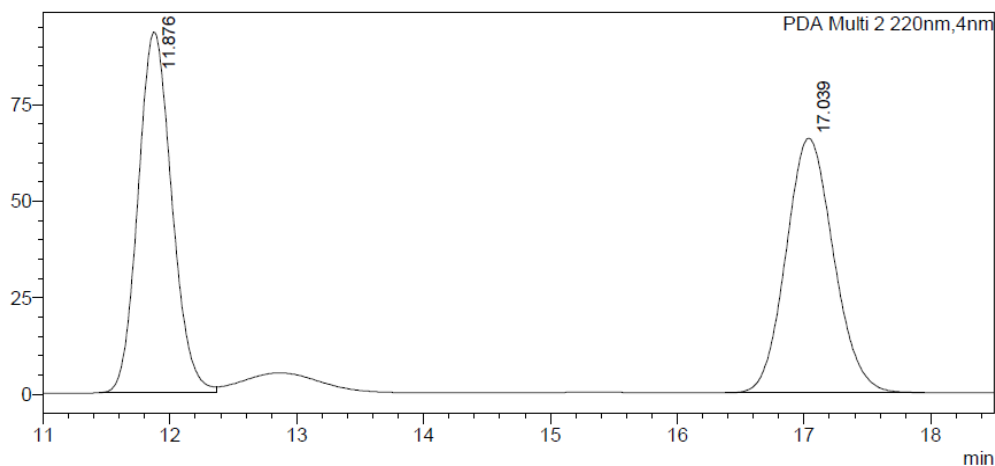

<Peak Table>

PDA Ch2 220nm

| Peak# | Ret. Time | Area    | Area%   |
|-------|-----------|---------|---------|
| 1     | 11.876    | 1731954 | 50.165  |
| 2     | 17.039    | 1720589 | 49.835  |
| Total |           | 3452543 | 100.000 |

mAU

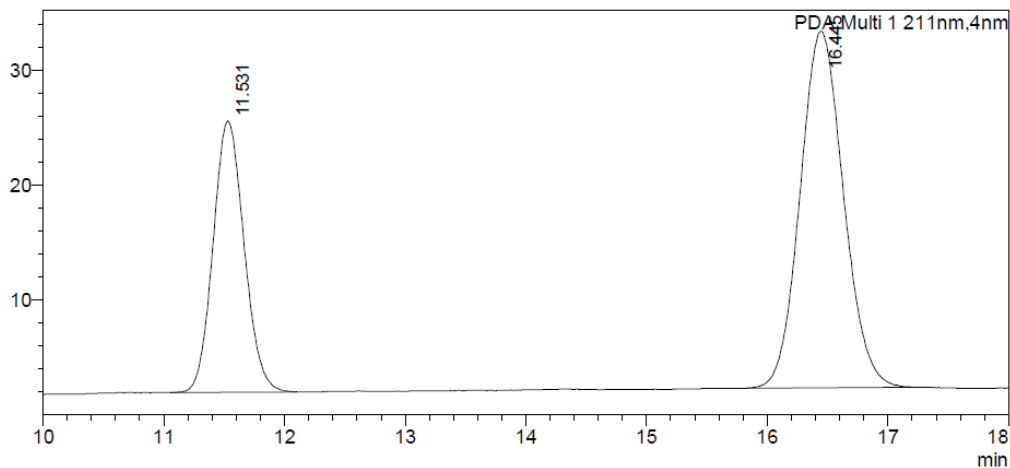

<Peak Table>

PDA Ch1 211nm

| Peak# | Ret. Time | Area    | Area%   |
|-------|-----------|---------|---------|
| 1     | 11.531    | 422336  | 35.203  |
| 2     | 16.445    | 777366  | 64.797  |
| Total |           | 1199702 | 100.000 |

Supporting Information

61

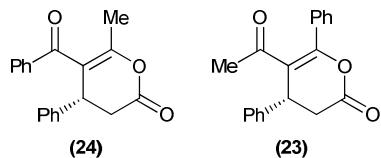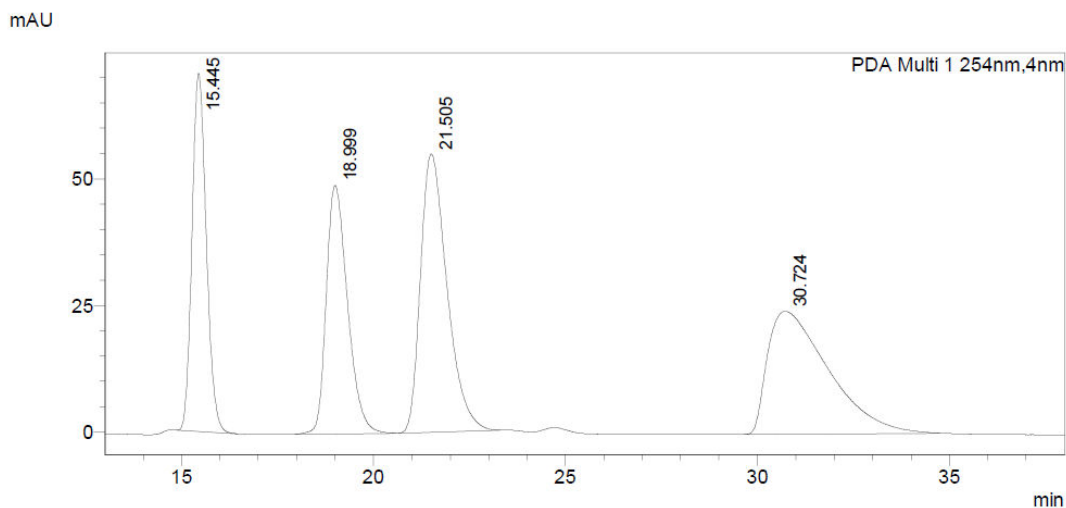

<Peak Table>

| Peak# | Ret. Time | Area    | Height | Area%   |
|-------|-----------|---------|--------|---------|
| 1     | 15.445    | 1834755 | 70769  | 20.289  |
| 2     | 18.999    | 1892528 | 49055  | 20.928  |
| 3     | 21.505    | 2642120 | 54974  | 29.217  |
| 4     | 30.724    | 2673557 | 24285  | 29.565  |
| Total |           | 9042960 | 199083 | 100.000 |

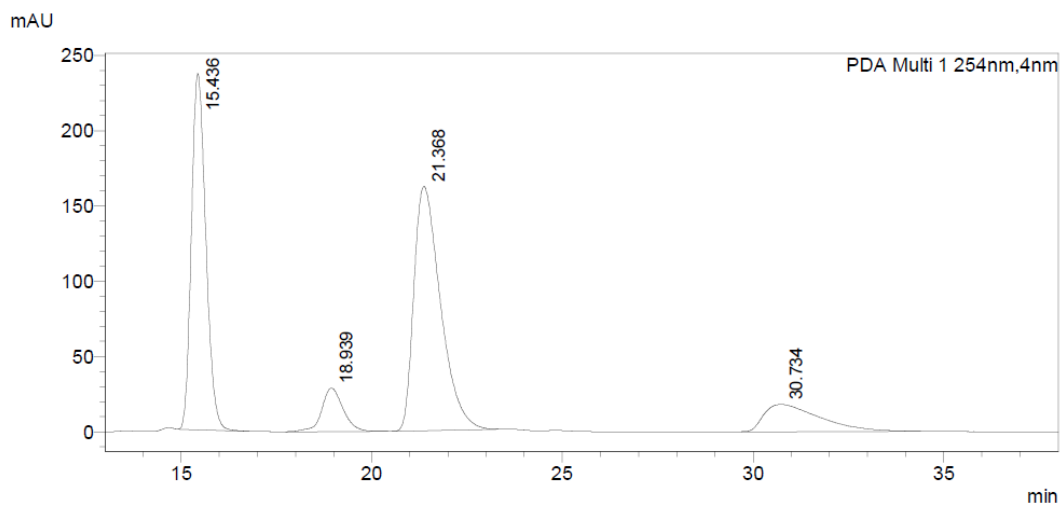

<Peak Table>

| Peak# | Ret. Time | Area     | Area%   |
|-------|-----------|----------|---------|
| 1     | 15.436    | 6223304  | 36.372  |
| 2     | 18.939    | 1128810  | 6.597   |
| 3     | 21.368    | 7927853  | 46.334  |
| 4     | 30.734    | 1830266  | 10.697  |
| Total |           | 17110233 | 100.000 |

Supporting Information

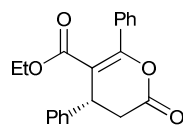

(27)

mAU

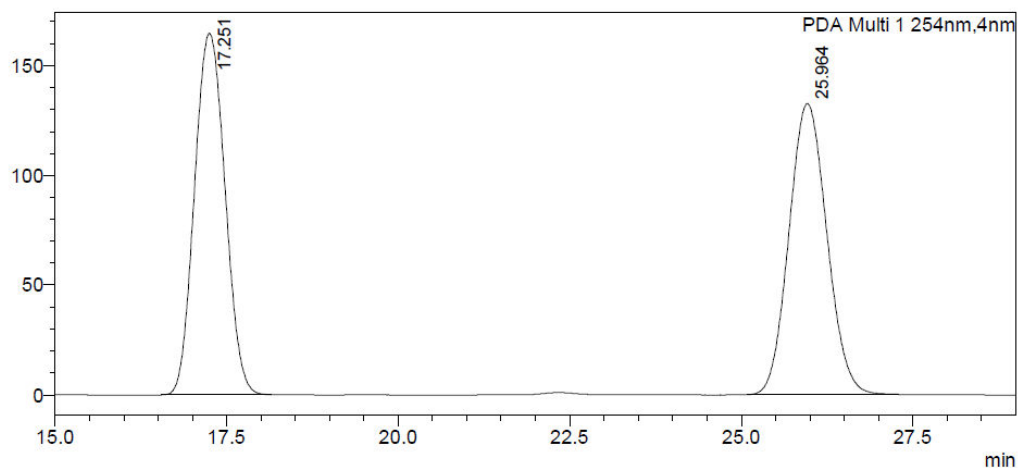

<Peak Table>

PDA Ch1 254nm

| Peak# | Ret. Time | Area     | Area%   |
|-------|-----------|----------|---------|
| 1     | 17.251    | 5094176  | 49.971  |
| 2     | 25.964    | 5100187  | 50.029  |
| Total |           | 10194363 | 100.000 |

mAU

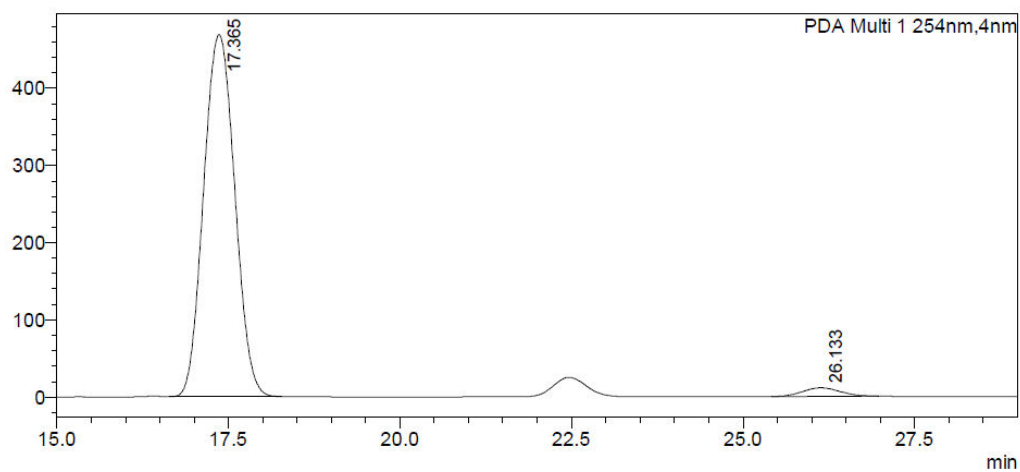

<Peak Table>

PDA Ch1 254nm

| Peak# | Ret. Time | Area     | Area%   |
|-------|-----------|----------|---------|
| 1     | 17.365    | 14806114 | 97.211  |
| 2     | 26.133    | 424784   | 2.789   |
| Total |           | 15230898 | 100.000 |

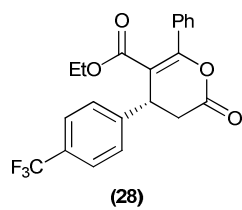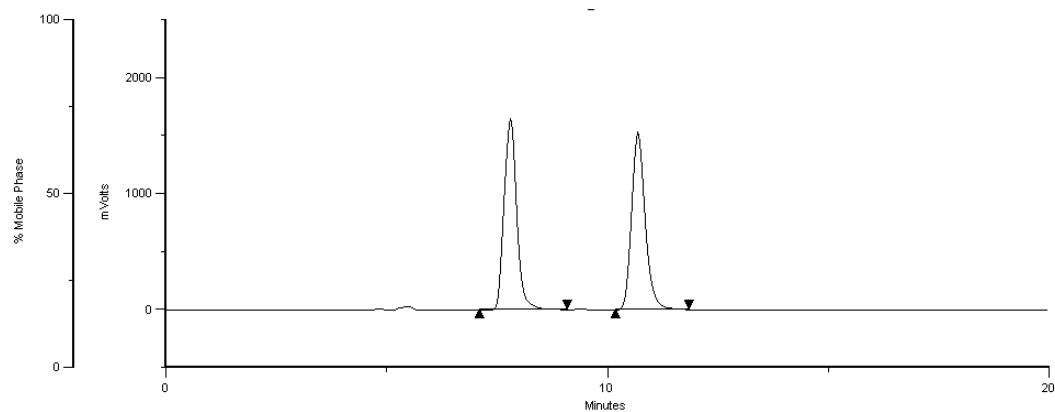

| Peak Name | R. Time | Area        | Area % |
|-----------|---------|-------------|--------|
| *1        | 7.81    | 55430956.00 | 49.94  |
| *2        | 10.69   | 55560492.00 | 50.06  |

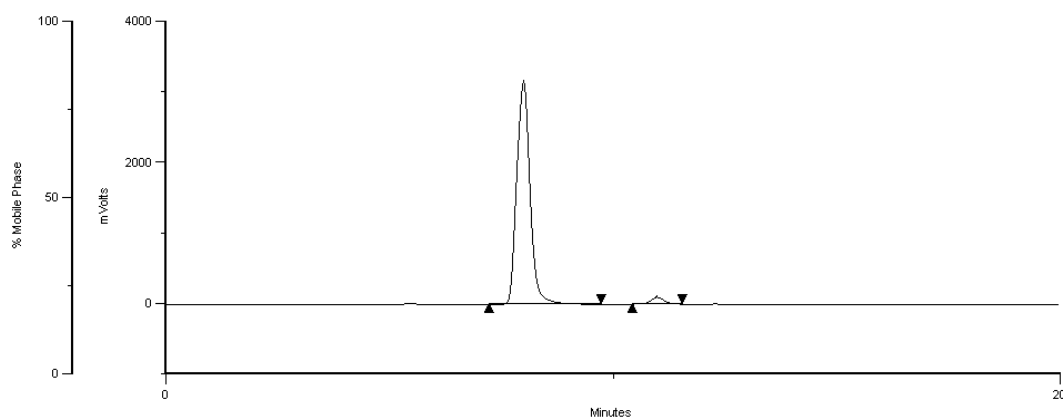

| Peak Name | R. Time | Area        | Area % |
|-----------|---------|-------------|--------|
| *1        | 8.00    | 09123360.00 | 96.86  |
| *2        | 10.99   | 3539802.00  | 3.14   |

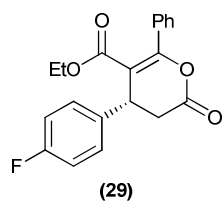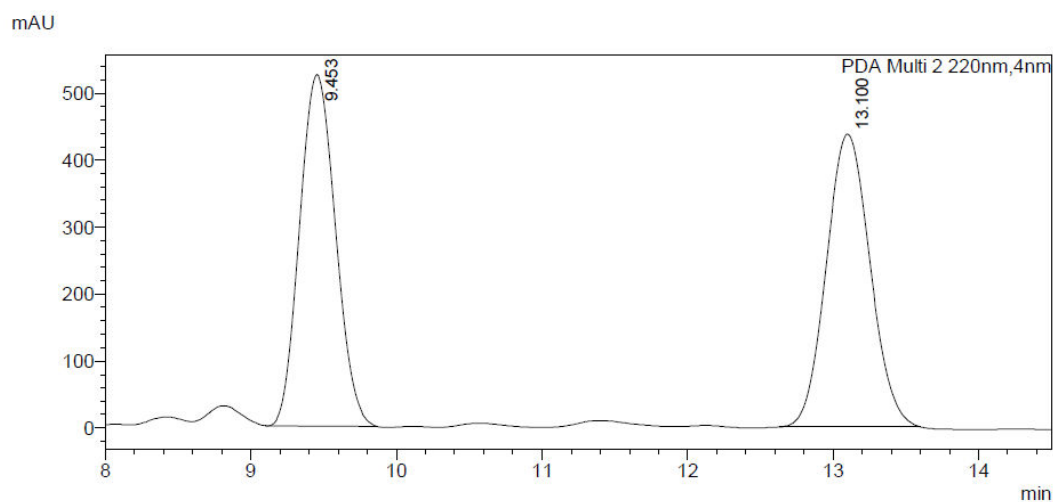

<Peak Table>

| Peak# | Ret. Time | Area     | Area%   |
|-------|-----------|----------|---------|
| 1     | 9.453     | 9016849  | 49.634  |
| 2     | 13.100    | 9149649  | 50.366  |
| Total |           | 18166498 | 100.000 |

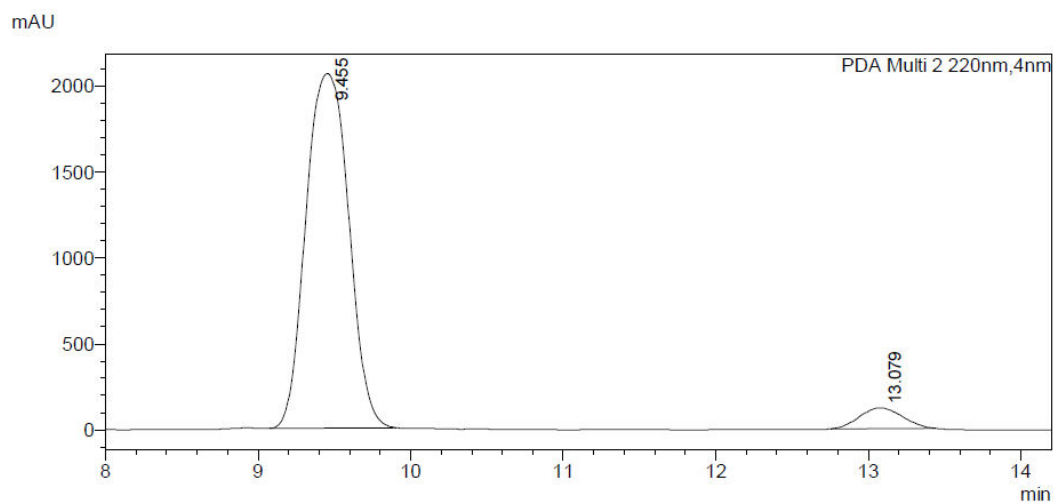

<Peak Table>

| Peak# | Ret. Time | Area     | Area%   |
|-------|-----------|----------|---------|
| 1     | 9.455     | 40283721 | 94.480  |
| 2     | 13.079    | 2353640  | 5.520   |
| Total |           | 42637360 | 100.000 |



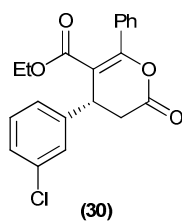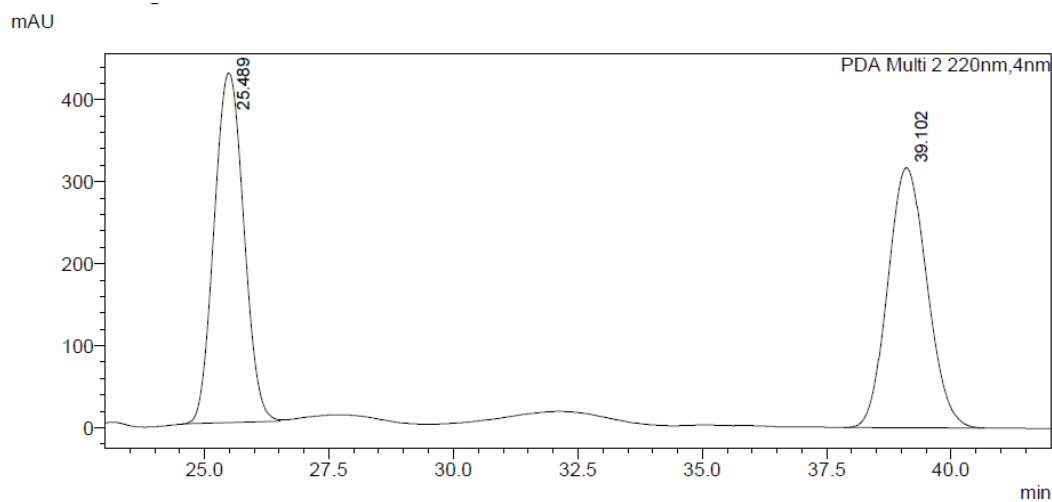

<Peak Table>

PDA Ch2 220nm

| Peak# | Ret. Time | Area     | Area%   |
|-------|-----------|----------|---------|
| 1     | 25.489    | 17641048 | 50.370  |
| 2     | 39.102    | 17381910 | 49.630  |
| Total |           | 35022958 | 100.000 |

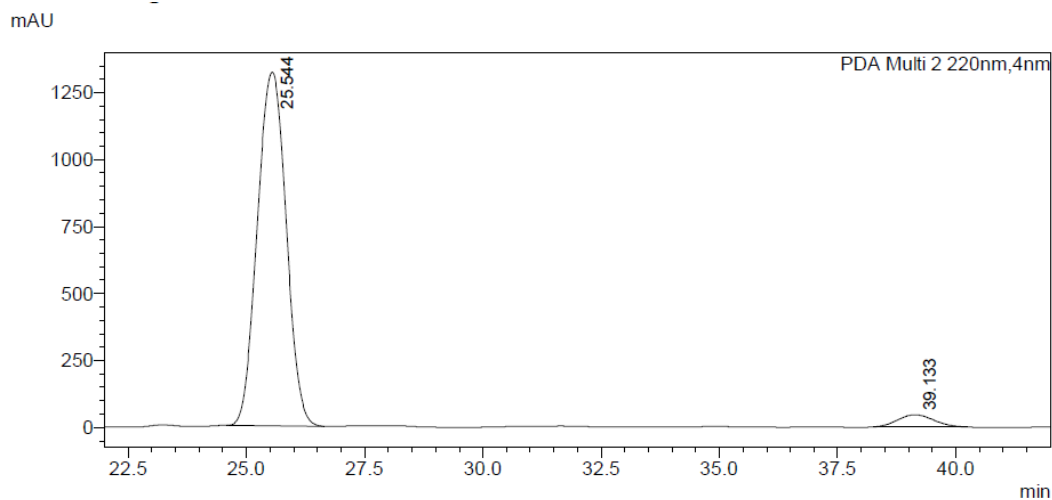

<Peak Table>

PDA Ch2 220nm

| Peak# | Ret. Time | Area     | Area%   |
|-------|-----------|----------|---------|
| 1     | 25.544    | 56012064 | 95.880  |
| 2     | 39.133    | 2406892  | 4.120   |
| Total |           | 58418956 | 100.000 |

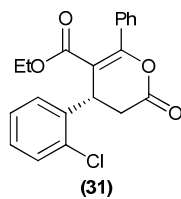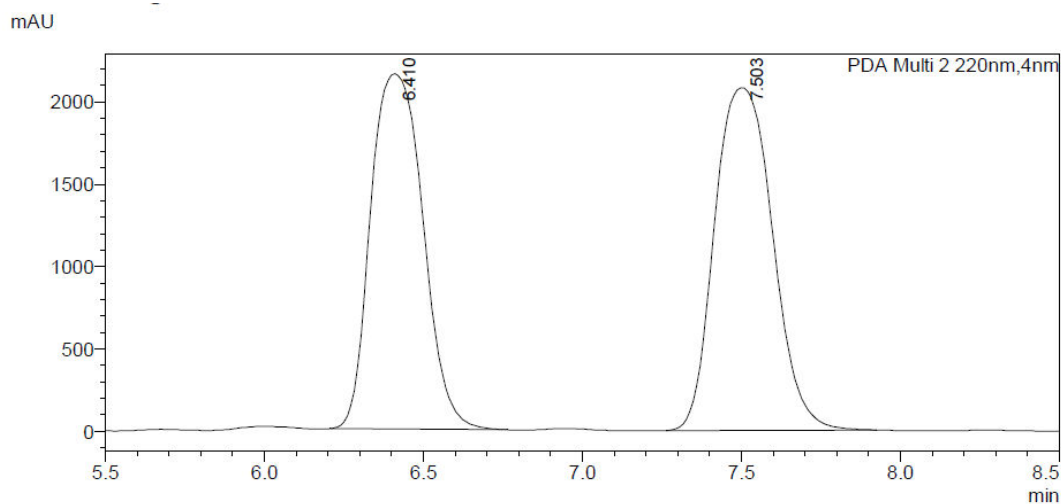

<Peak Table>

PDA Ch2 220nm

| Peak# | Ret. Time | Area     | Area%   |
|-------|-----------|----------|---------|
| 1     | 6.410     | 24708204 | 48.324  |
| 2     | 7.503     | 26422298 | 51.676  |
| Total |           | 51130502 | 100.000 |

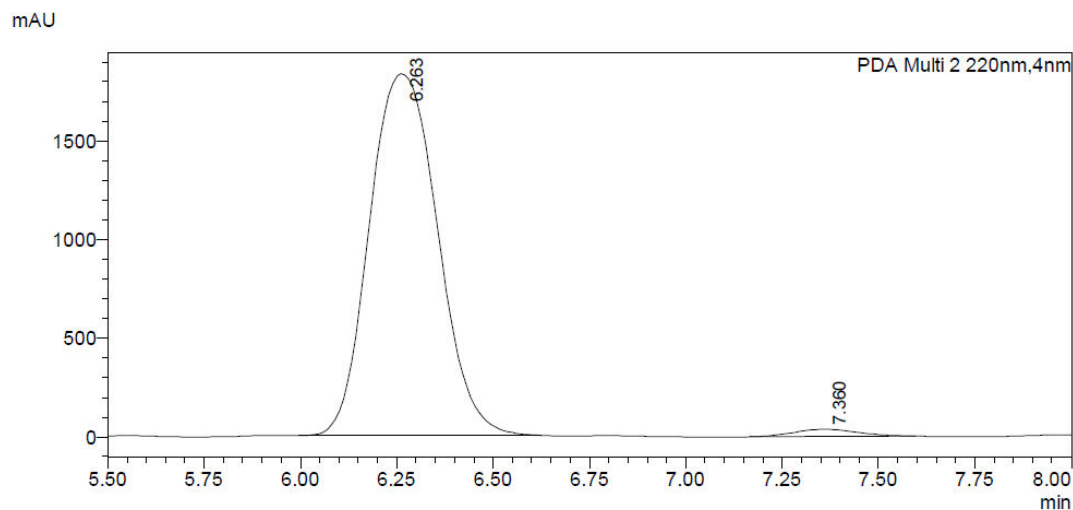

<Peak Table>

PDA Ch2 220nm

| Peak# | Ret. Time | Area     | Area%   |
|-------|-----------|----------|---------|
| 1     | 6.263     | 22579121 | 98.150  |
| 2     | 7.360     | 425549   | 1.850   |
| Total |           | 23004670 | 100.000 |

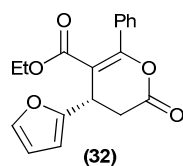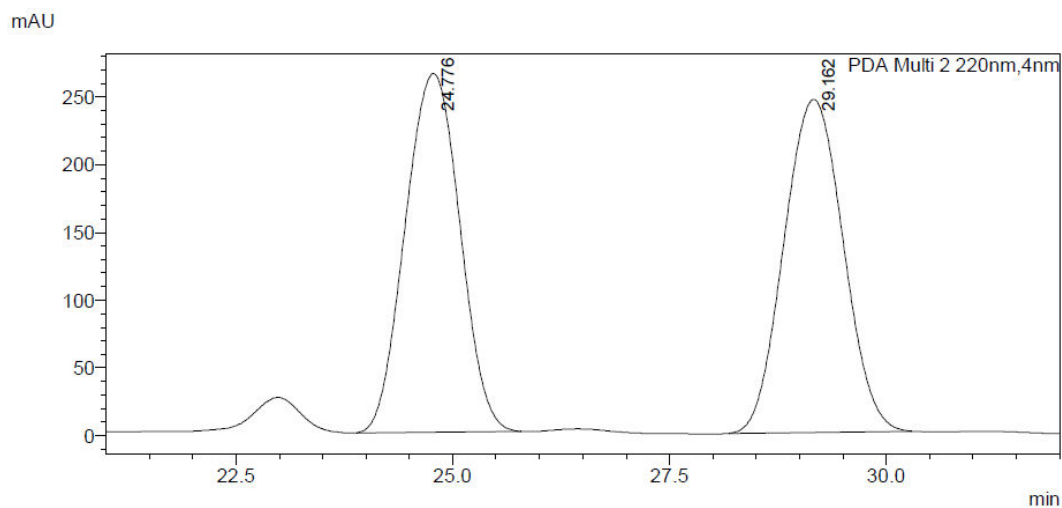

<Peak Table>

PDA Ch2 220nm

| Peak# | Ret. Time | Area     | Area%   |
|-------|-----------|----------|---------|
| 1     | 24.776    | 11634036 | 49.863  |
| 2     | 29.162    | 11697951 | 50.137  |
| Total |           | 23331986 | 100.000 |

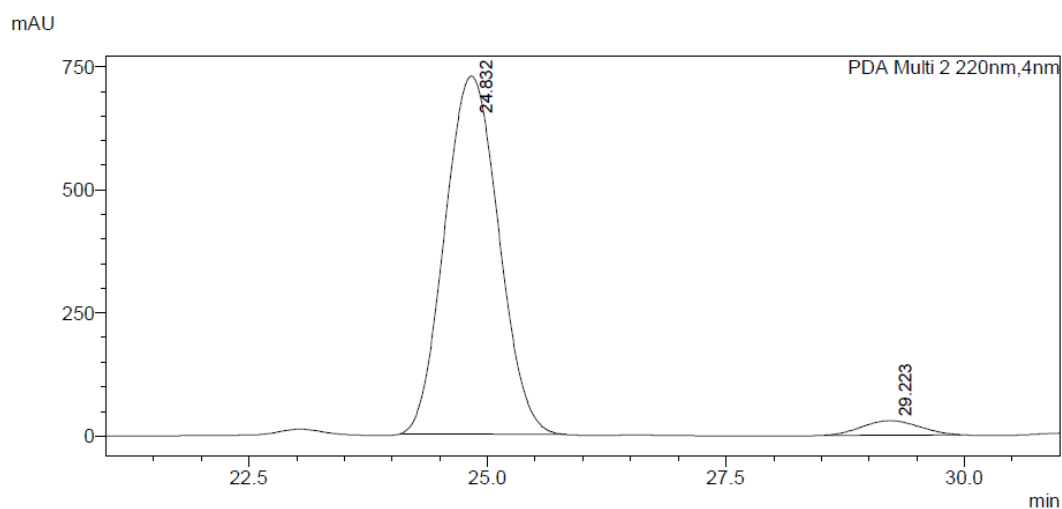

<Peak Table>

PDA Ch2 220nm

| Peak# | Ret. Time | Area     | Area%   |
|-------|-----------|----------|---------|
| 1     | 24.832    | 28622021 | 95.987  |
| 2     | 29.223    | 1196648  | 4.013   |
| Total |           | 29818669 | 100.000 |

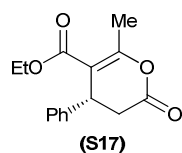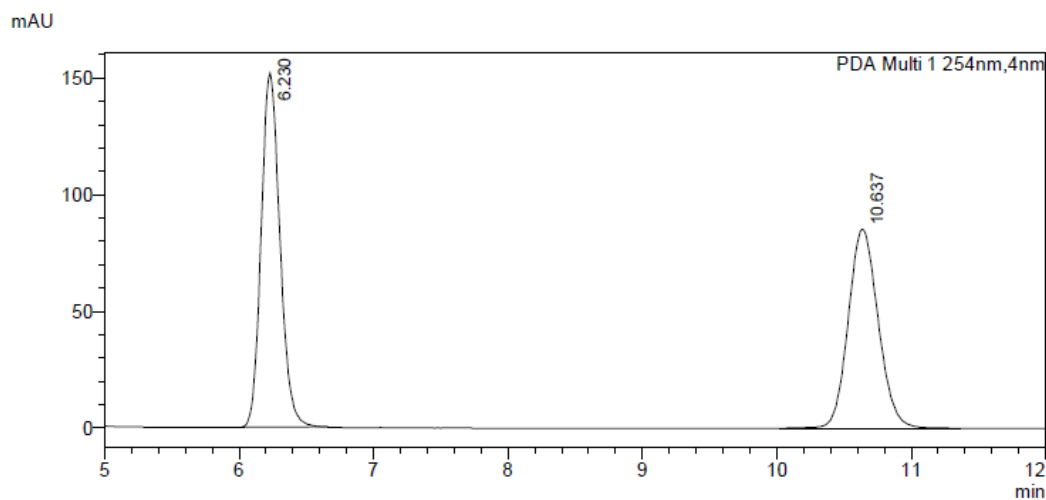

<Peak Table>

PDA Ch1 254nm

| Peak# | Ret. Time | Area    | Area%   |
|-------|-----------|---------|---------|
| 1     | 6.230     | 1474174 | 52.824  |
| 2     | 10.637    | 1316536 | 47.176  |
| Total |           | 2790711 | 100.000 |

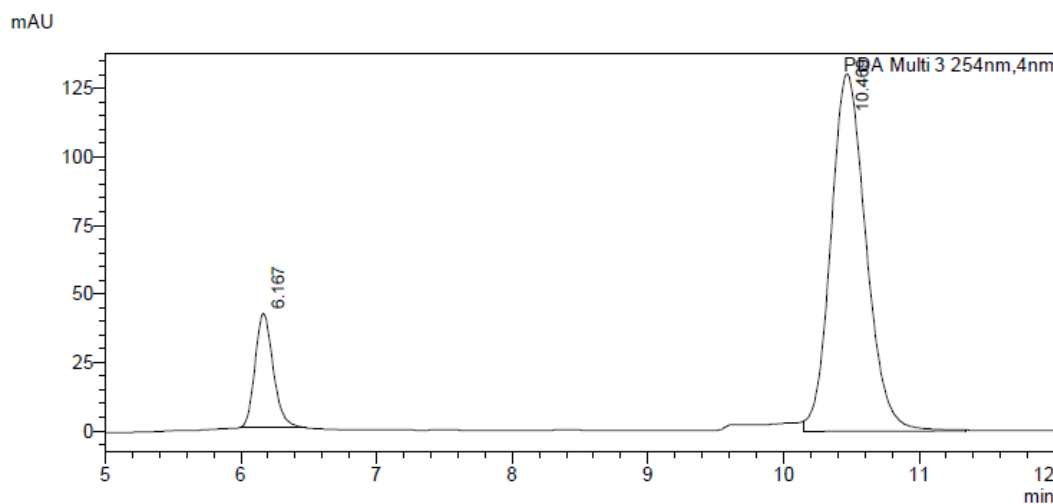

<Peak Table>

PDA Ch3 254nm

| Peak# | Ret. Time | Area    | Area%   |
|-------|-----------|---------|---------|
| 1     | 6.167     | 388103  | 14.189  |
| 2     | 10.469    | 2347103 | 85.811  |
| Total |           | 2735205 | 100.000 |

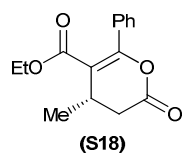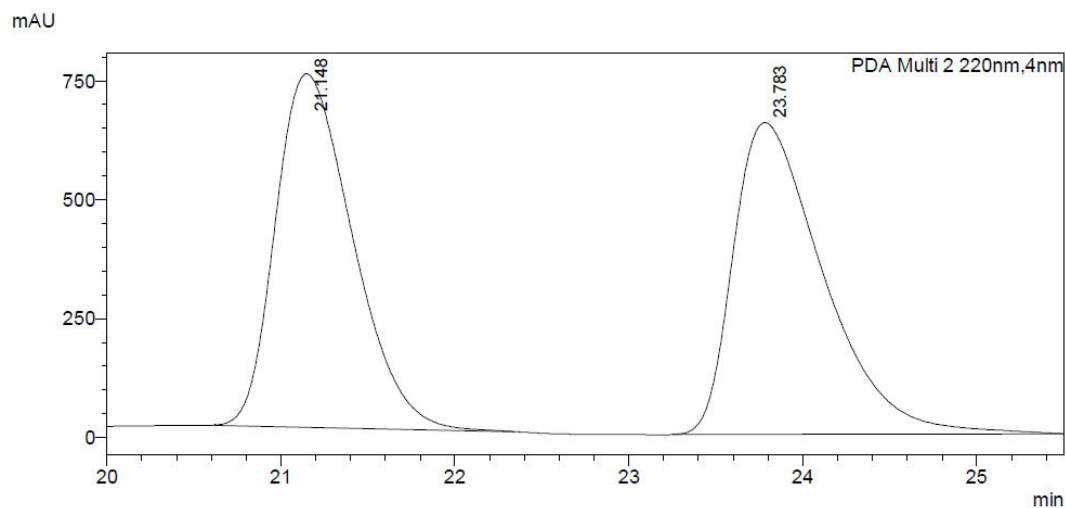

<Peak Table>

PDA Ch2 220nm

| Peak# | Ret. Time | Area     | Area%   |
|-------|-----------|----------|---------|
| 1     | 21.148    | 22977826 | 49.181  |
| 2     | 23.783    | 23743505 | 50.819  |
| Total |           | 46721331 | 100.000 |

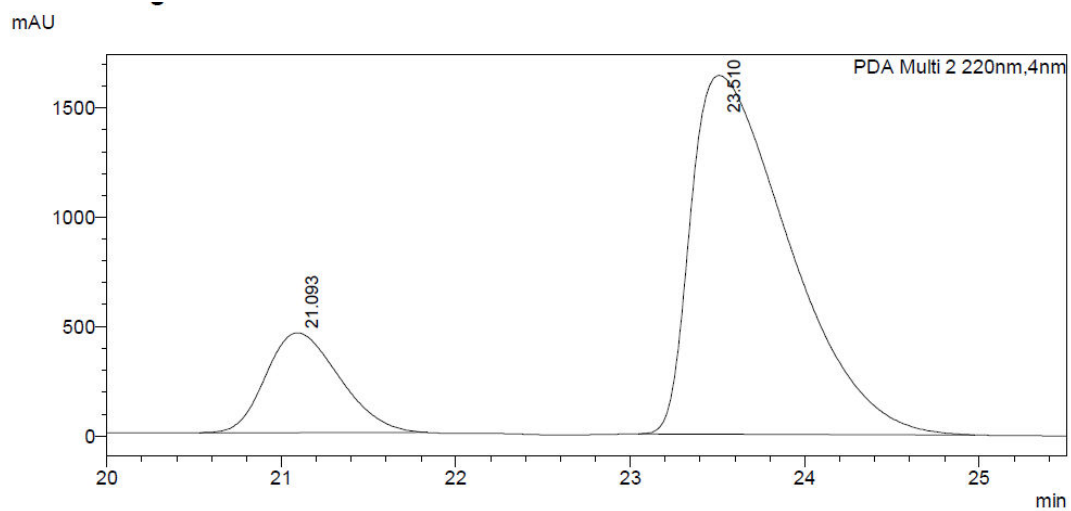

<Peak Table>

PDA Ch2 220nm

| Peak# | Ret. Time | Area     | Area%   |
|-------|-----------|----------|---------|
| 1     | 21.093    | 13391681 | 17.301  |
| 2     | 23.510    | 64012169 | 82.699  |
| Total |           | 77403851 | 100.000 |

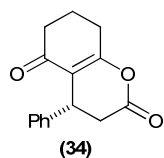

<Chromatogram>

mAU

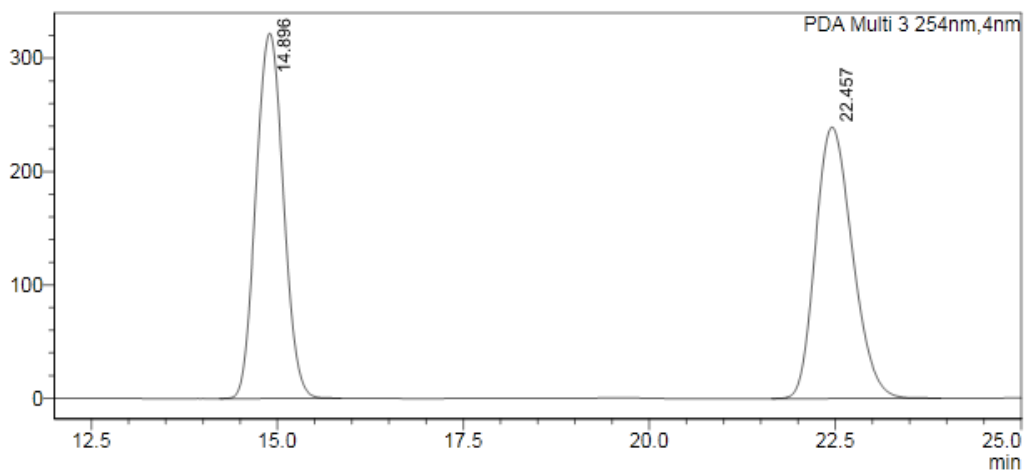

<Peak Table>

| Peak# | Ret. Time | Area     | Area%   |
|-------|-----------|----------|---------|
| 1     | 14.896    | 8253586  | 50.001  |
| 2     | 22.457    | 8253183  | 49.999  |
| Total |           | 16506769 | 100.000 |

<Chromatogram>

mAU

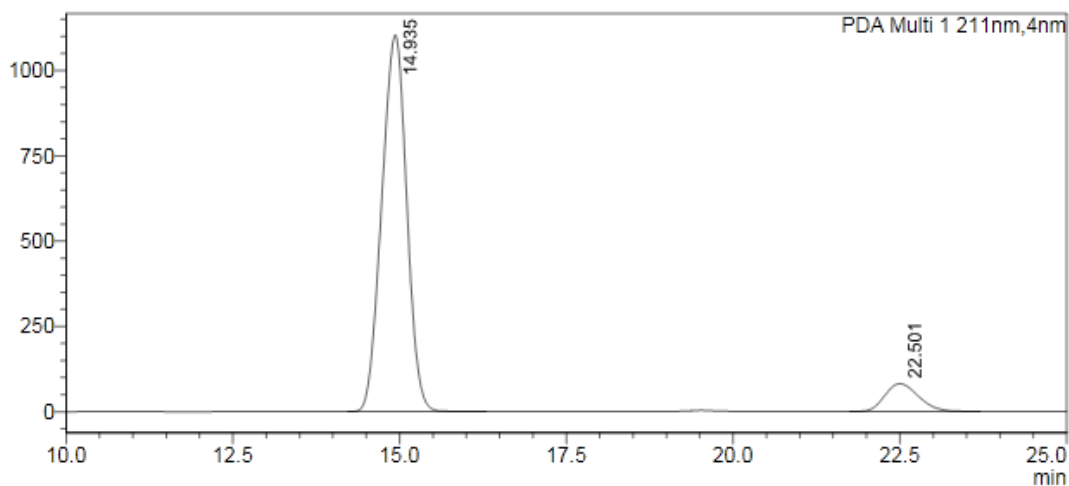

<Peak Table>

| Peak# | Ret. Time | Area     | Area%   |
|-------|-----------|----------|---------|
| 1     | 14.935    | 28732660 | 90.909  |
| 2     | 22.501    | 2873139  | 9.091   |
| Total |           | 31605799 | 100.000 |

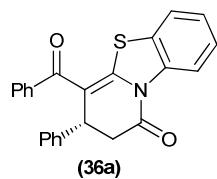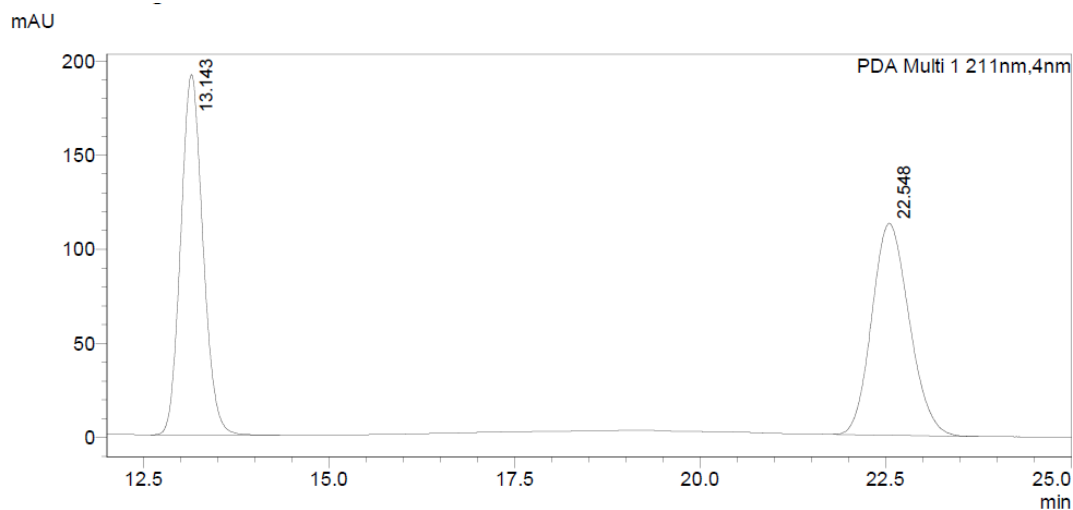

<Peak Table>

| Peak# | Ret. Time | Area    | Area%   |
|-------|-----------|---------|---------|
| 1     | 13.143    | 3989307 | 50.198  |
| 2     | 22.548    | 3957761 | 49.802  |
| Total |           | 7947068 | 100.000 |

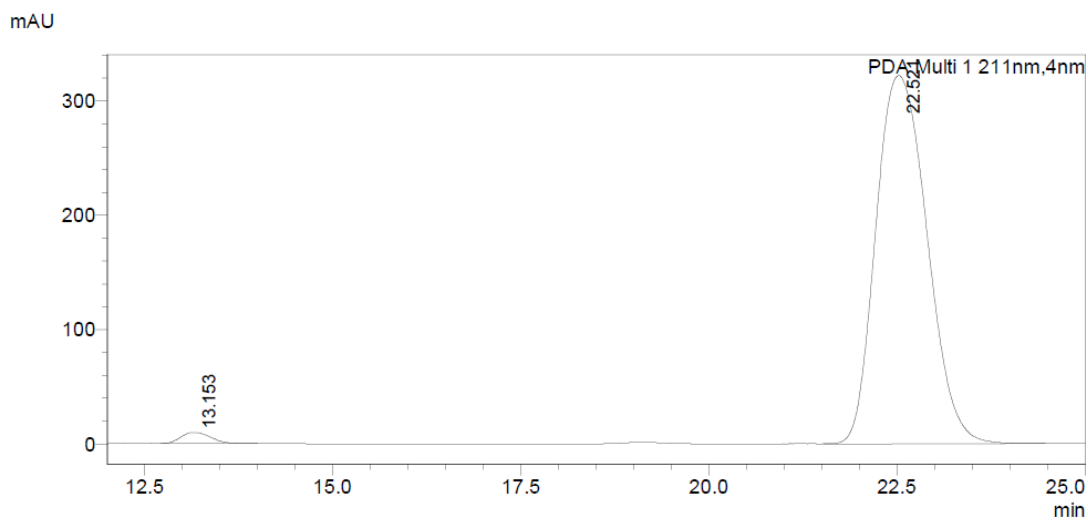

<Peak Table>

| Peak# | Ret. Time | Area     | Area%   |
|-------|-----------|----------|---------|
| 1     | 13.153    | 267397   | 1.721   |
| 2     | 22.521    | 15266872 | 98.279  |
| Total |           | 15534269 | 100.000 |

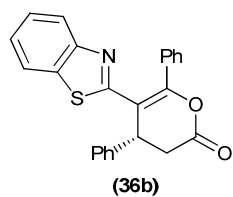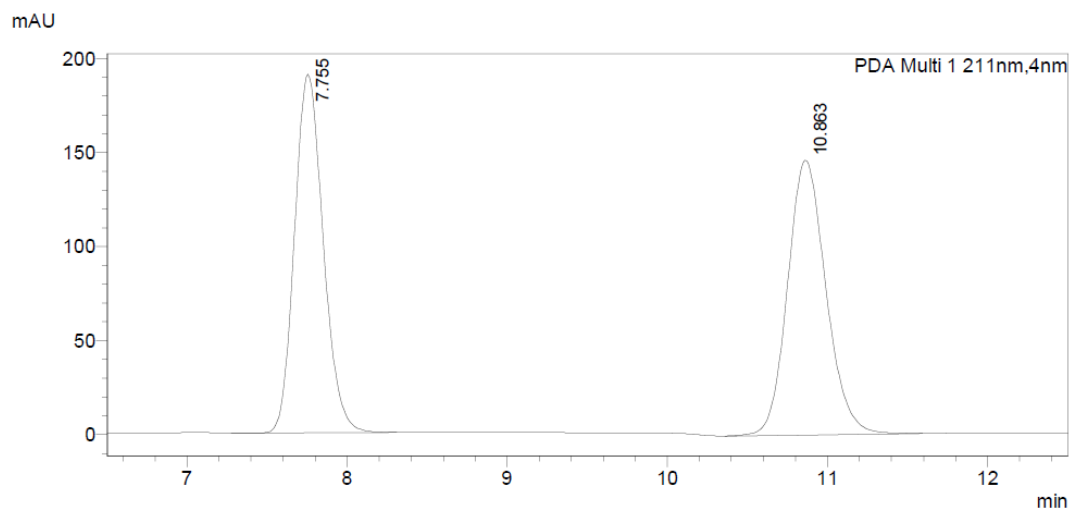

<Peak Table>

| PDA Ch1 211nm |           |         |         |
|---------------|-----------|---------|---------|
| Peak#         | Ret. Time | Area    | Area%   |
| 1             | 7.755     | 2374617 | 49.400  |
| 2             | 10.863    | 2432318 | 50.600  |
| Total         |           | 4806935 | 100.000 |

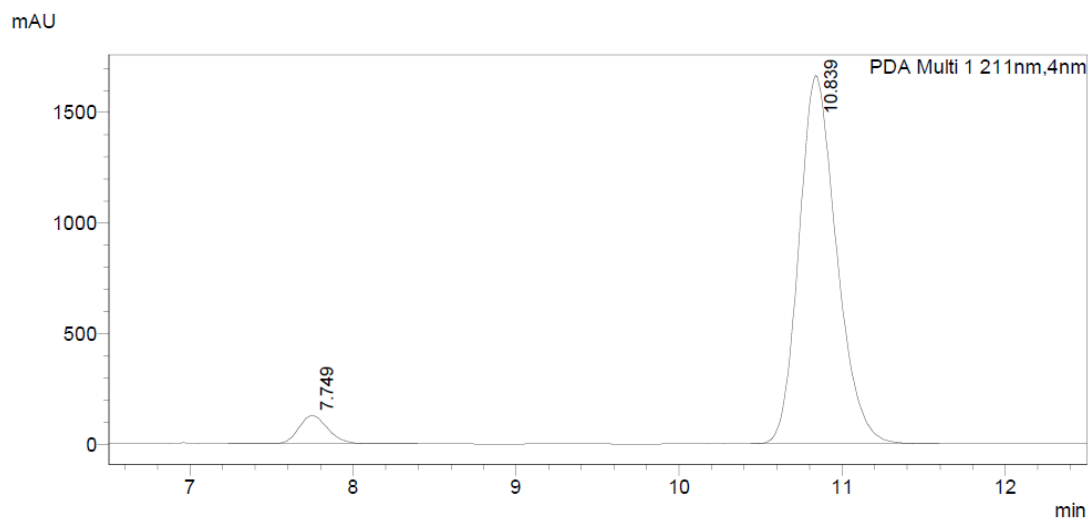

<Peak Table>

| PDA Ch1 211nm |           |          |         |
|---------------|-----------|----------|---------|
| Peak#         | Ret. Time | Area     | Area%   |
| 1             | 7.749     | 1613932  | 5.704   |
| 2             | 10.839    | 26682109 | 94.296  |
| Total         |           | 28296041 | 100.000 |



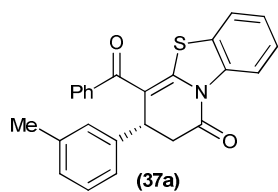

<Chromatogram>

mAU

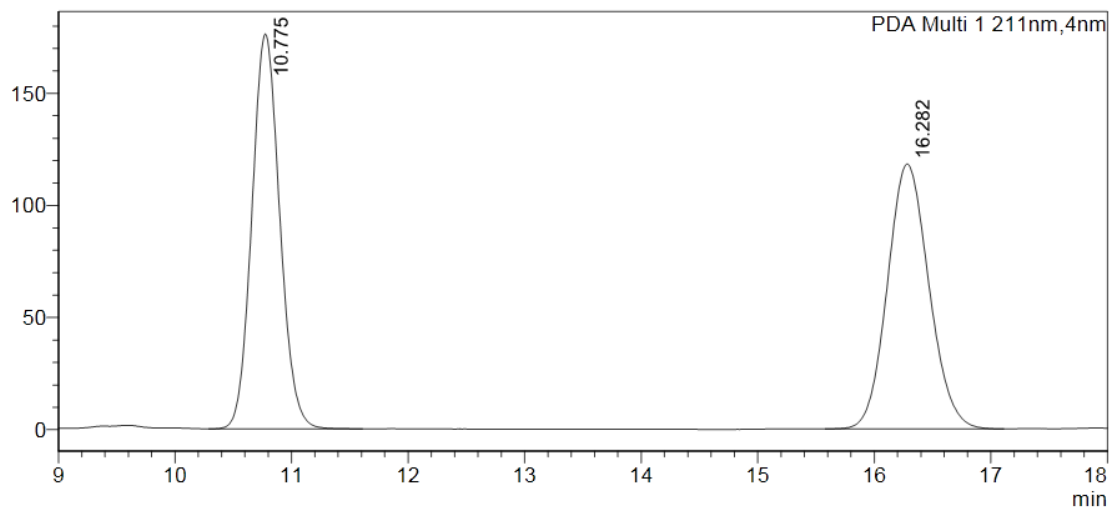

<Peak Table>

PDA Ch1 211nm

| Peak# | Ret. Time | Area    | Area%   |
|-------|-----------|---------|---------|
| 1     | 10.775    | 2926645 | 50.049  |
| 2     | 16.282    | 2920933 | 49.951  |
| Total |           | 5847577 | 100.000 |

<Chromatogram>

mAU

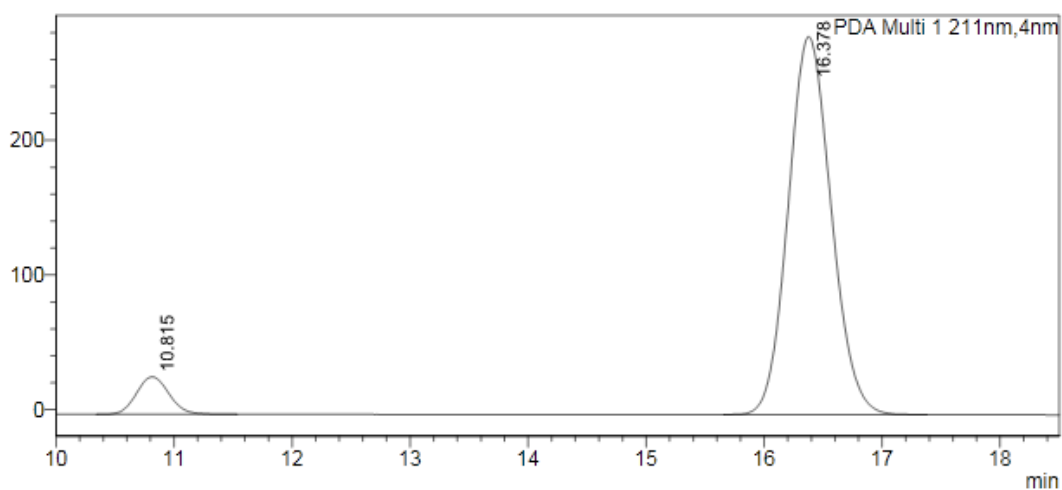

<Peak Table>

PDA Ch1 211nm

| Peak# | Ret. Time | Area    | Area%   |
|-------|-----------|---------|---------|
| 1     | 10.815    | 534482  | 6.986   |
| 2     | 16.378    | 7116238 | 93.014  |
| Total |           | 7650720 | 100.000 |

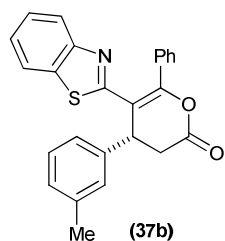

**<Chromatogram>**

mAU

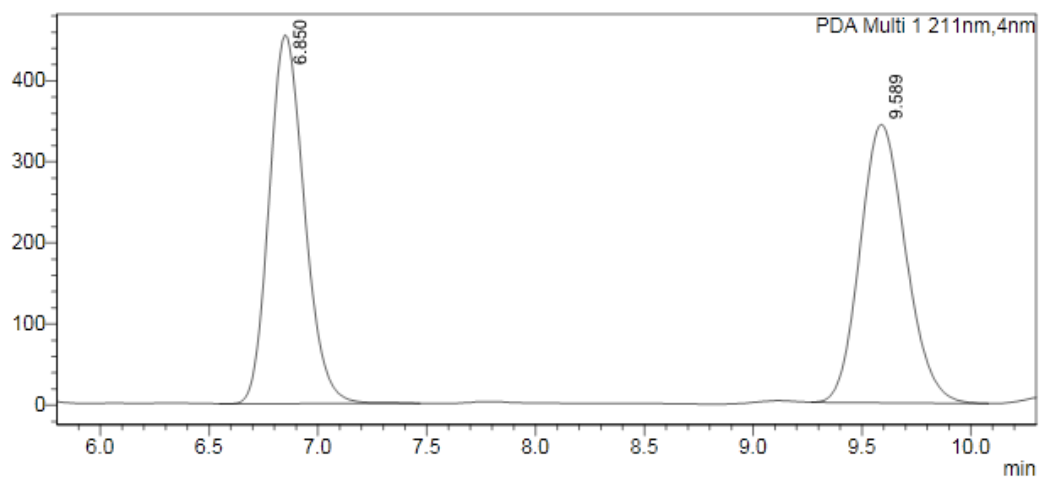

**<Peak Table>**

| Peak# | Ret. Time | Area     | Area%   |
|-------|-----------|----------|---------|
| 1     | 6.850     | 5125088  | 50.540  |
| 2     | 9.589     | 5015508  | 49.460  |
| Total |           | 10140596 | 100.000 |

**<Chromatogram>**

mAU

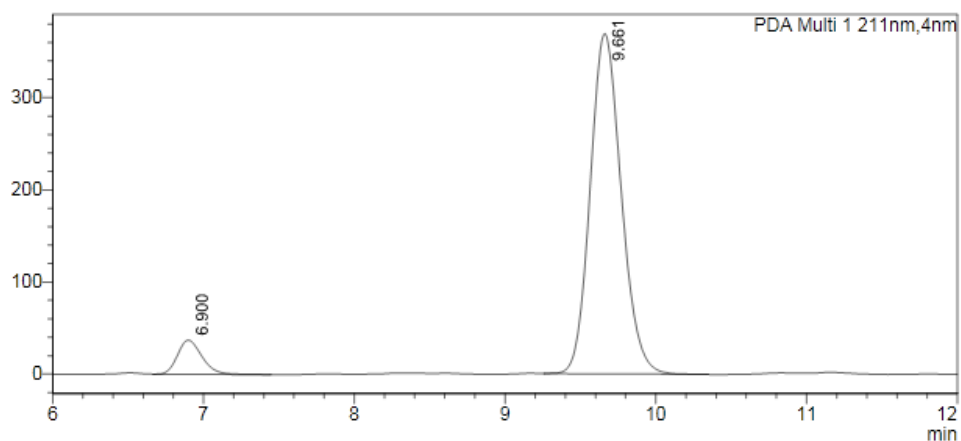

**<Peak Table>**

| Peak# | Ret. Time | Area    | Area%   |
|-------|-----------|---------|---------|
| 1     | 6.900     | 415181  | 7.284   |
| 2     | 9.661     | 5284705 | 92.716  |
| Total |           | 5699885 | 100.000 |

Supporting Information

75

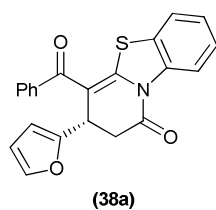

mAU

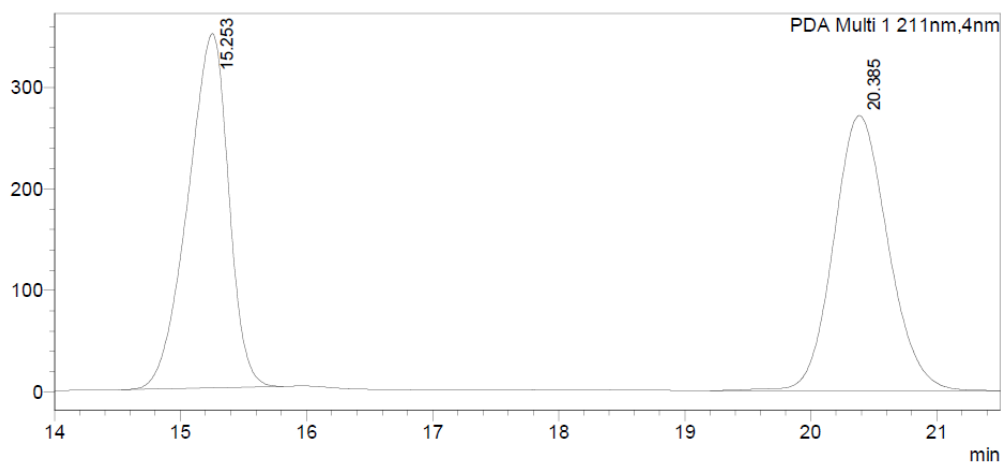

<Peak Table>

PDA Ch1 211nm

| Peak# | Ret. Time | Area     | Area%   |
|-------|-----------|----------|---------|
| 1     | 15.253    | 7874774  | 49.261  |
| 2     | 20.385    | 8110945  | 50.739  |
| Total |           | 15985719 | 100.000 |

<Chromatogram>

mAU

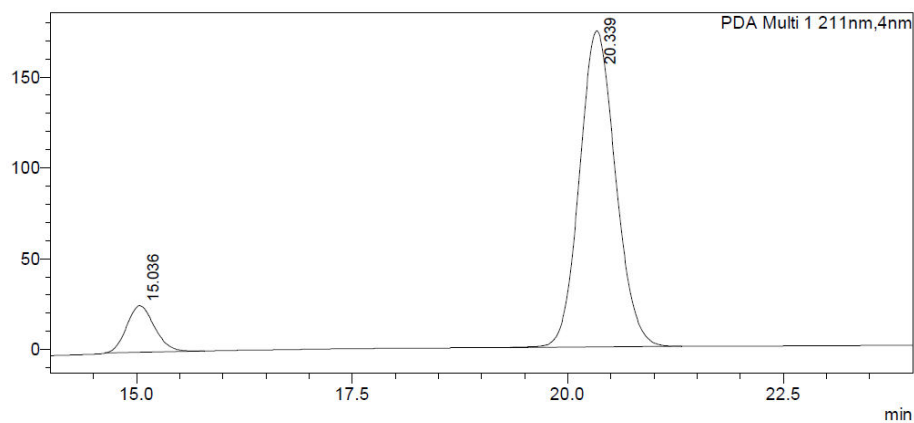

<Peak Table>

PDA Ch1 211nm

| Peak# | Ret. Time | Area    | Area%   |
|-------|-----------|---------|---------|
| 1     | 15.036    | 580528  | 10.282  |
| 2     | 20.339    | 5065469 | 89.718  |
| Total |           | 5645997 | 100.000 |

Supporting Information

76

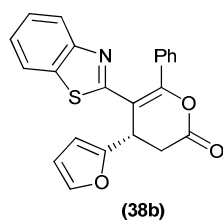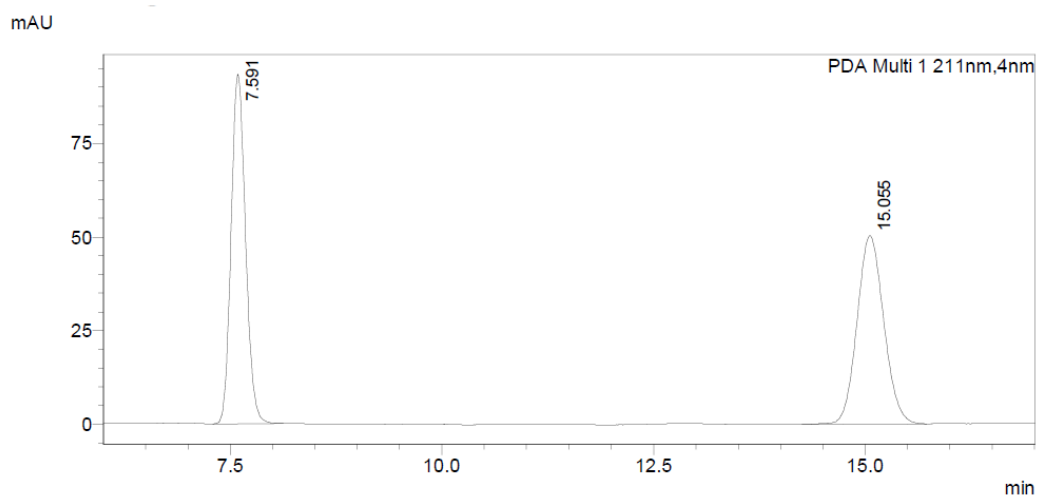

<Peak Table>

| Peak# | Ret. Time | Area    | Area%   |
|-------|-----------|---------|---------|
| 1     | 7.591     | 1106875 | 49.955  |
| 2     | 15.055    | 1108864 | 50.045  |
| Total |           | 2215738 | 100.000 |

mAU

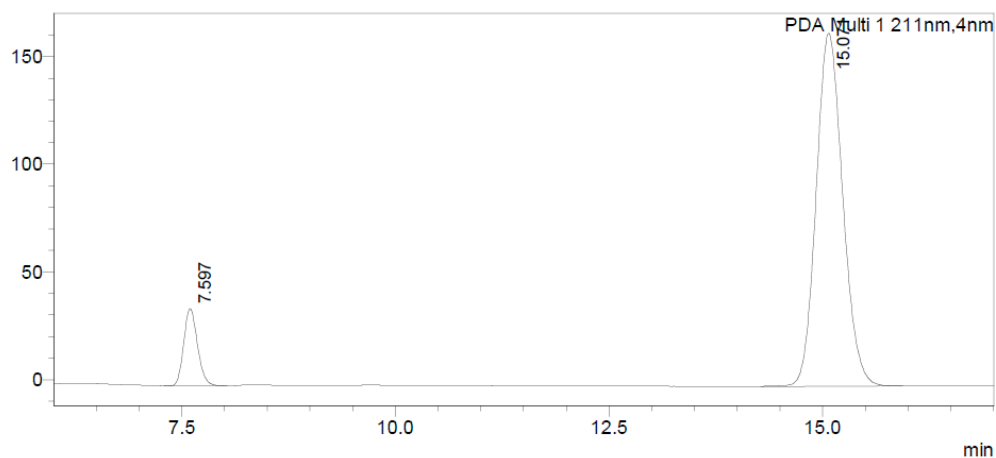

<Peak Table>

| Peak# | Ret. Time | Area    | Area%   |
|-------|-----------|---------|---------|
| 1     | 7.597     | 401752  | 10.190  |
| 2     | 15.071    | 3540907 | 89.810  |
| Total |           | 3942659 | 100.000 |

Supporting Information

77

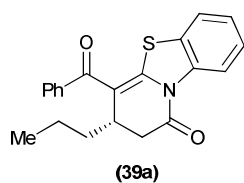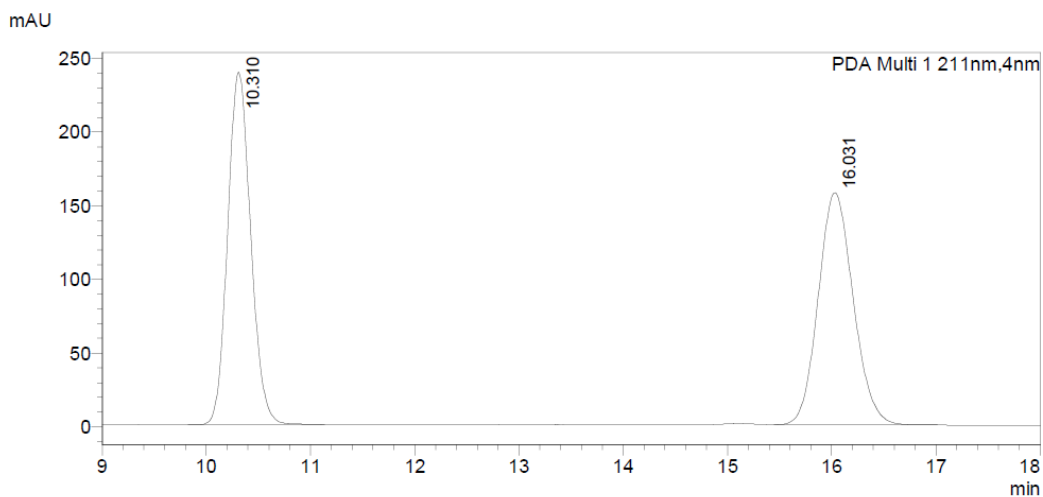

<Peak Table>

| PDA Ch1 211nm |           |         |         |
|---------------|-----------|---------|---------|
| Peak#         | Ret. Time | Area    | Area%   |
| 1             | 10.310    | 3683426 | 50.046  |
| 2             | 16.031    | 3676616 | 49.954  |
| Total         |           | 7360042 | 100.000 |

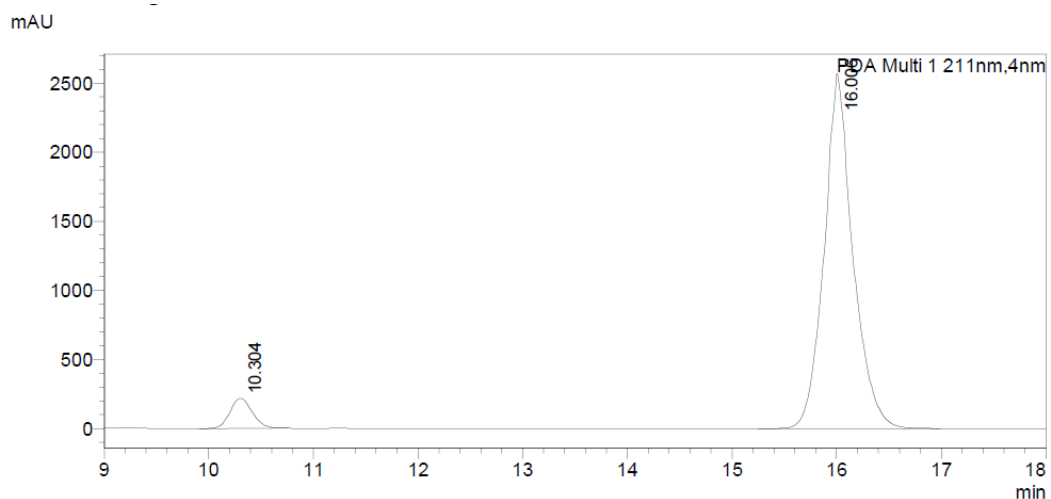

<Peak Table>

| PDA Ch1 211nm |           |          |         |
|---------------|-----------|----------|---------|
| Peak#         | Ret. Time | Area     | Area%   |
| 1             | 10.304    | 3230901  | 6.210   |
| 2             | 16.006    | 48794070 | 93.790  |
| Total         |           | 52024971 | 100.000 |

Supporting Information

78

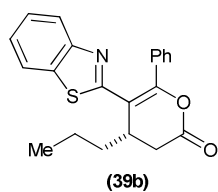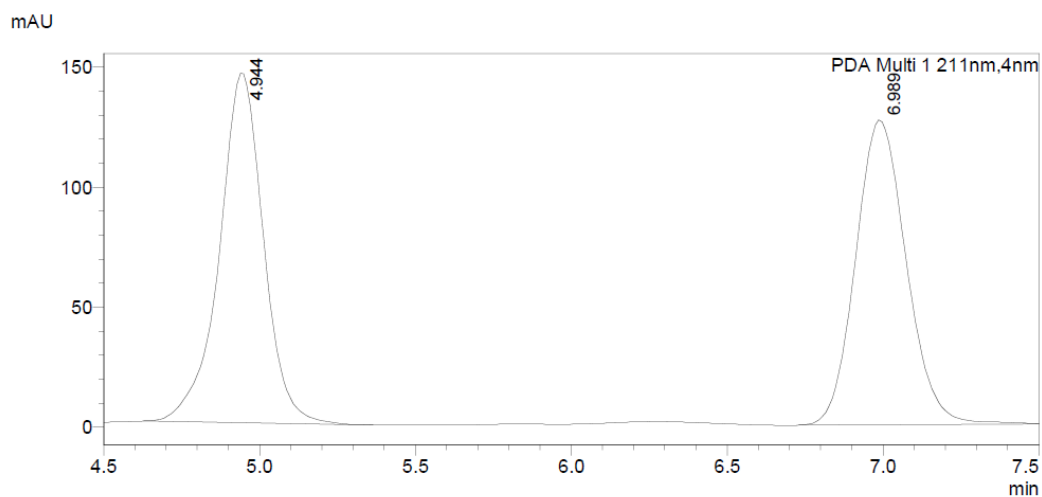

<Peak Table>

| Peak# | Ret. Time | Area    | Area%   |
|-------|-----------|---------|---------|
| 1     | 4.944     | 1434346 | 49.942  |
| 2     | 6.989     | 1437690 | 50.058  |
| Total |           | 2872036 | 100.000 |

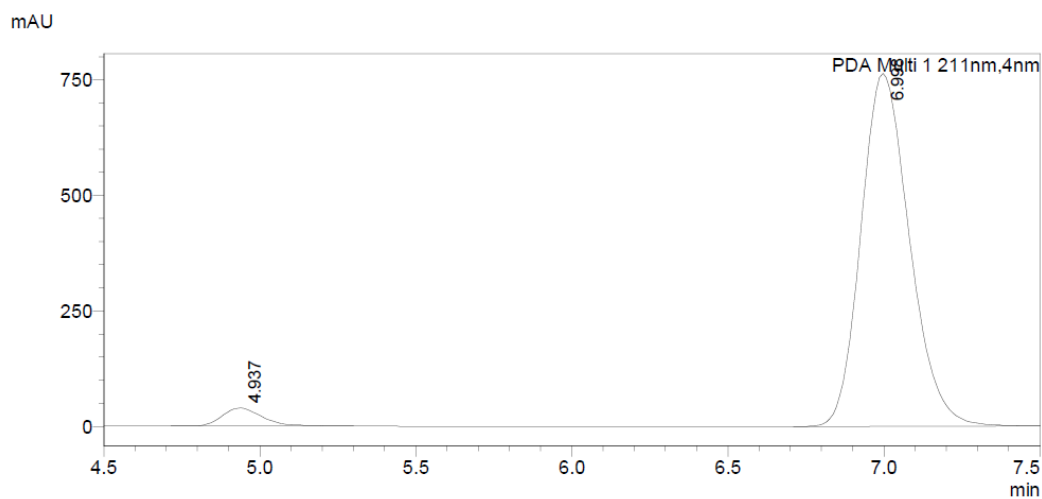

<Peak Table>

| Peak# | Ret. Time | Area    | Area%   |
|-------|-----------|---------|---------|
| 1     | 4.937     | 355011  | 4.121   |
| 2     | 6.998     | 8260034 | 95.879  |
| Total |           | 8615045 | 100.000 |

Supporting Information

79

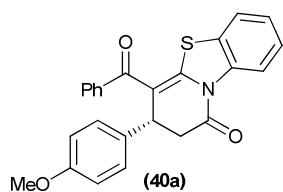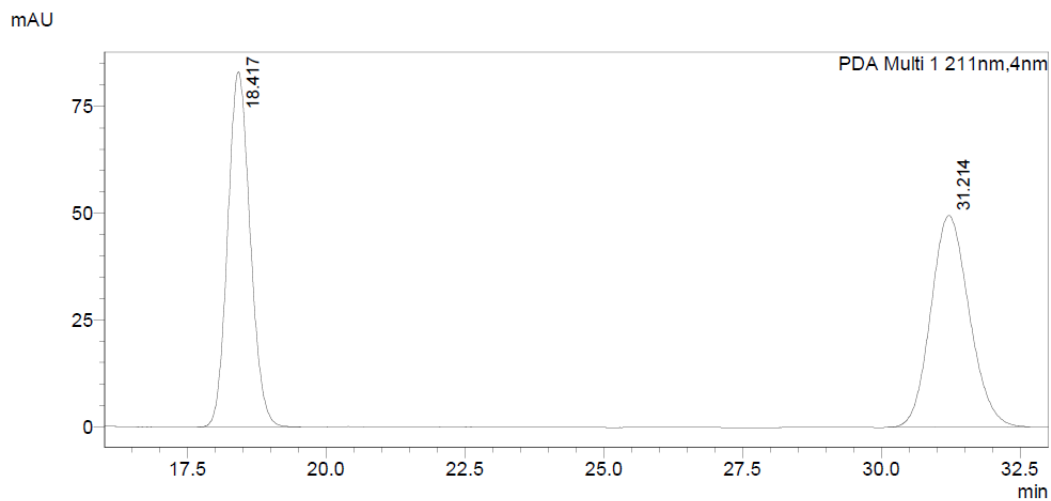

<Peak Table>

| PDA Ch1 211nm |           |         |         |
|---------------|-----------|---------|---------|
| Peak#         | Ret. Time | Area    | Area%   |
| 1             | 18.417    | 2348456 | 49.550  |
| 2             | 31.214    | 2385992 | 50.342  |
| 3             | 33.808    | 5114    | 0.108   |
| Total         |           | 4739562 | 100.000 |

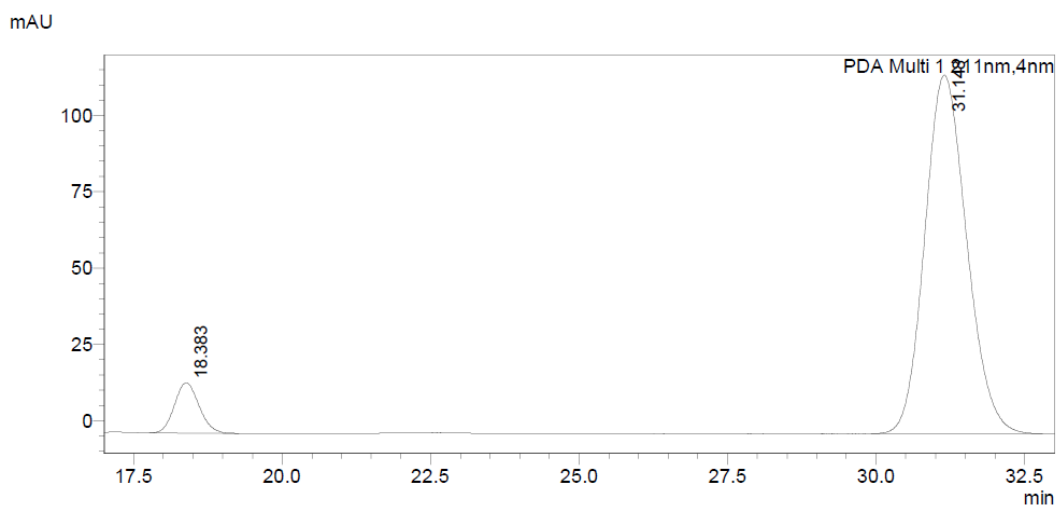

<Peak Table>

| PDA Ch1 211nm |           |         |         |
|---------------|-----------|---------|---------|
| Peak#         | Ret. Time | Area    | Area%   |
| 1             | 18.383    | 473352  | 7.589   |
| 2             | 31.148    | 5763671 | 92.411  |
| Total         |           | 6237023 | 100.000 |

Supporting Information

80

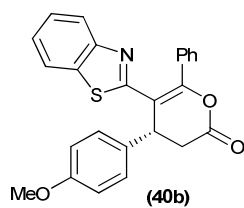

mAU

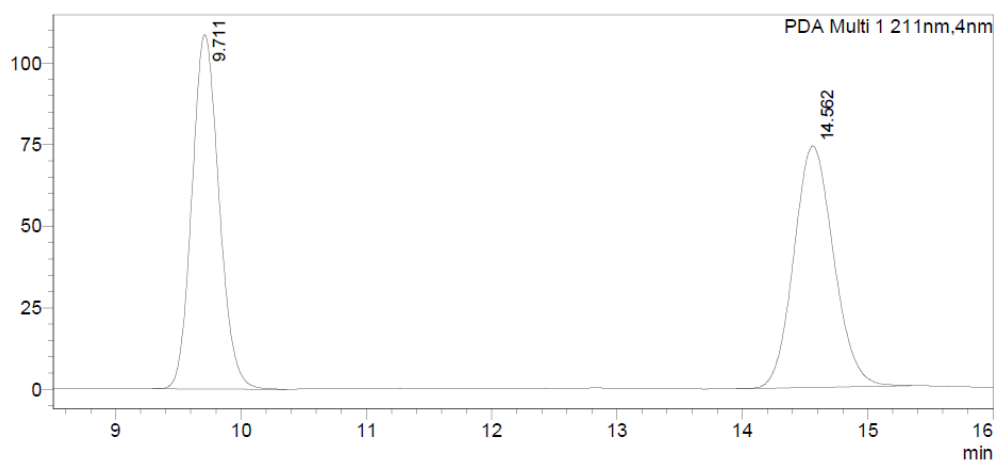

<Peak Table>

| PDA Ch1 211nm |           |         |         |
|---------------|-----------|---------|---------|
| Peak#         | Ret. Time | Area    | Area%   |
| 1             | 9.711     | 1636034 | 49.971  |
| 2             | 14.562    | 1637944 | 50.029  |
| Total         |           | 3273978 | 100.000 |

mAU

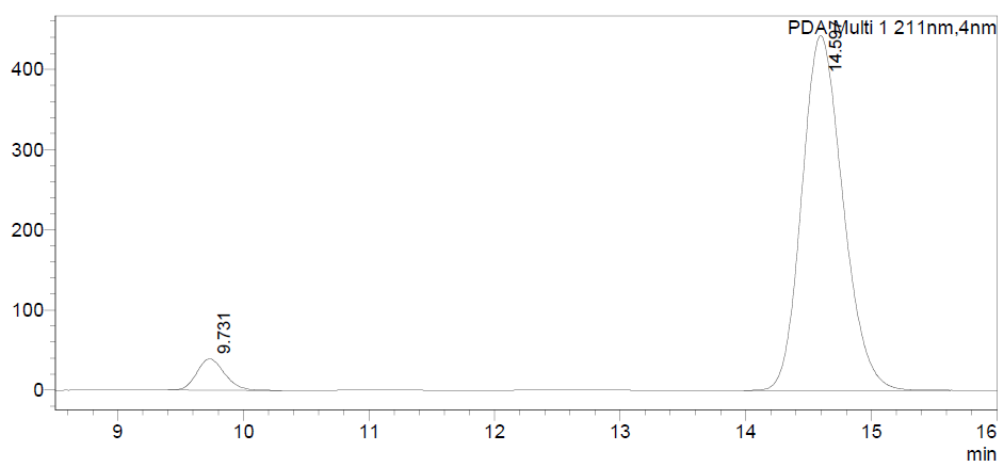

<Peak Table>

| PDA Ch1 211nm |           |          |         |
|---------------|-----------|----------|---------|
| Peak#         | Ret. Time | Area     | Area%   |
| 1             | 9.731     | 604793   | 5.677   |
| 2             | 14.597    | 10047698 | 94.323  |
| Total         |           | 10652491 | 100.000 |



### NMR Spectra

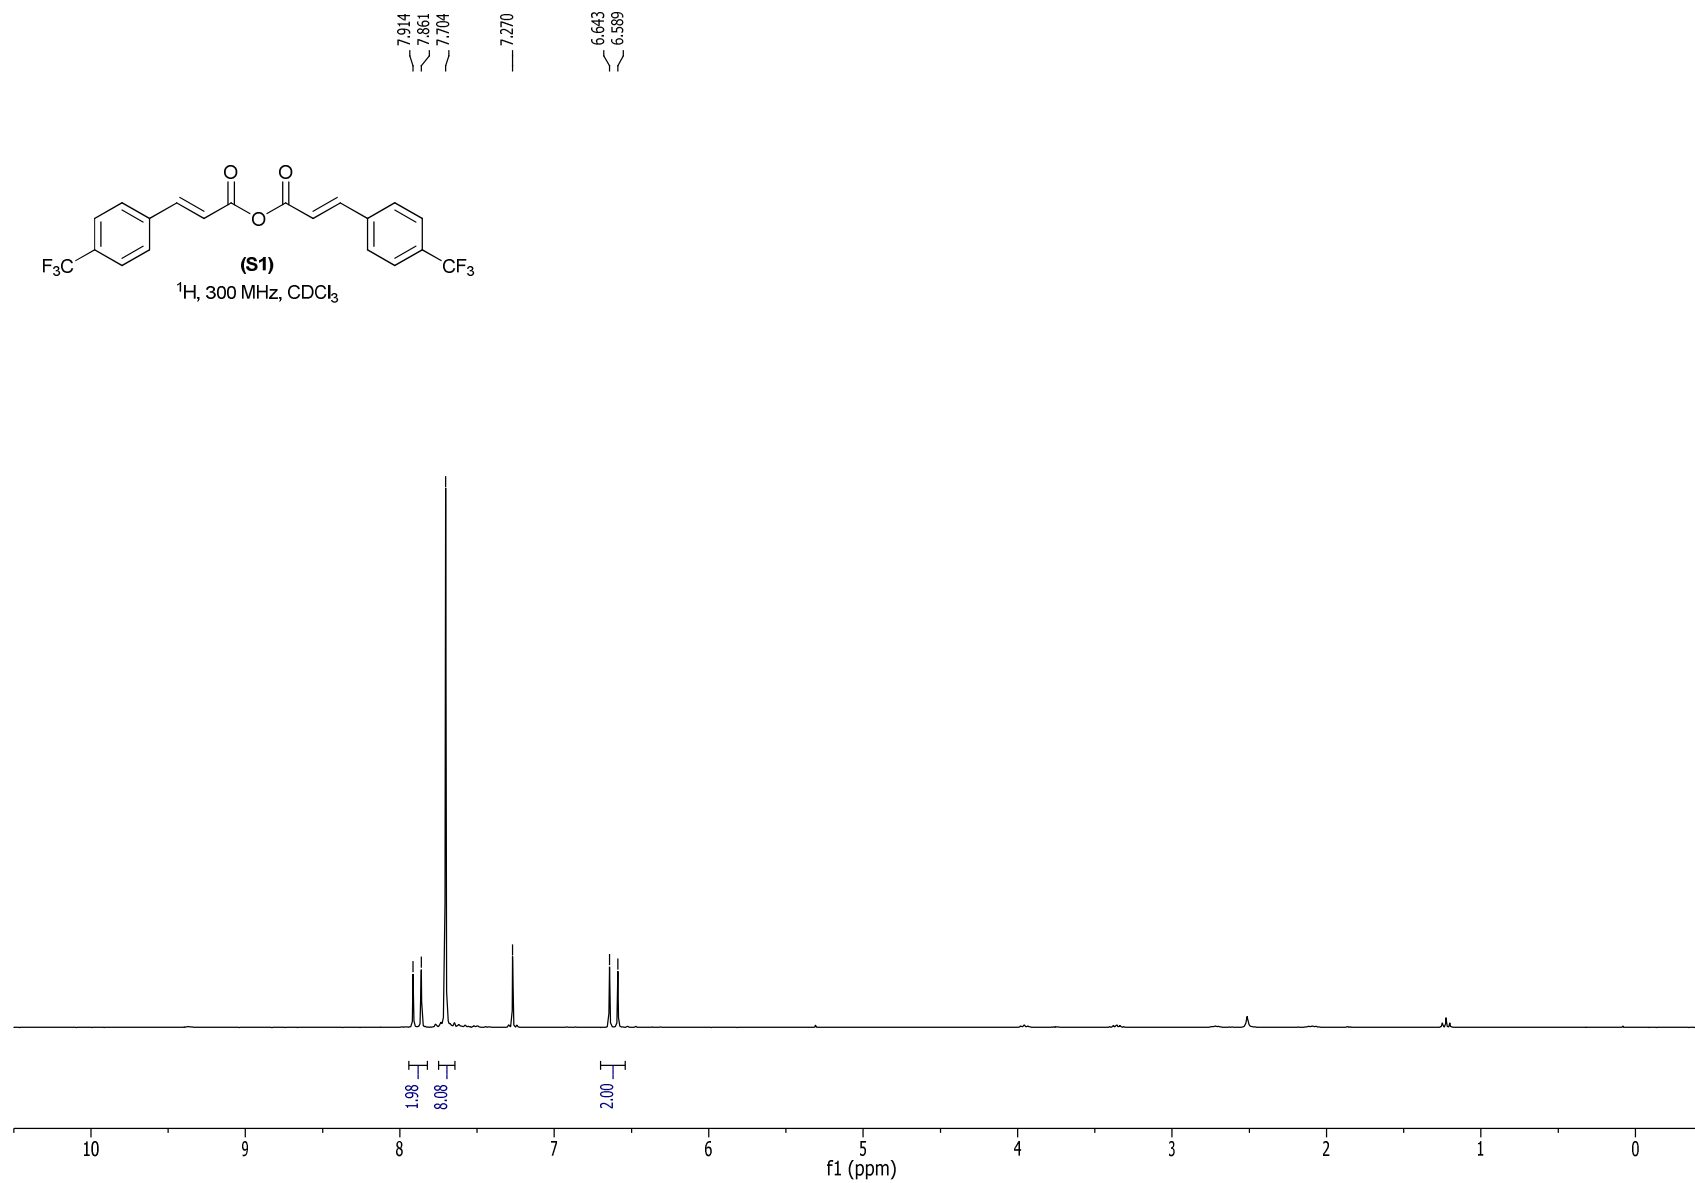

Supporting Information

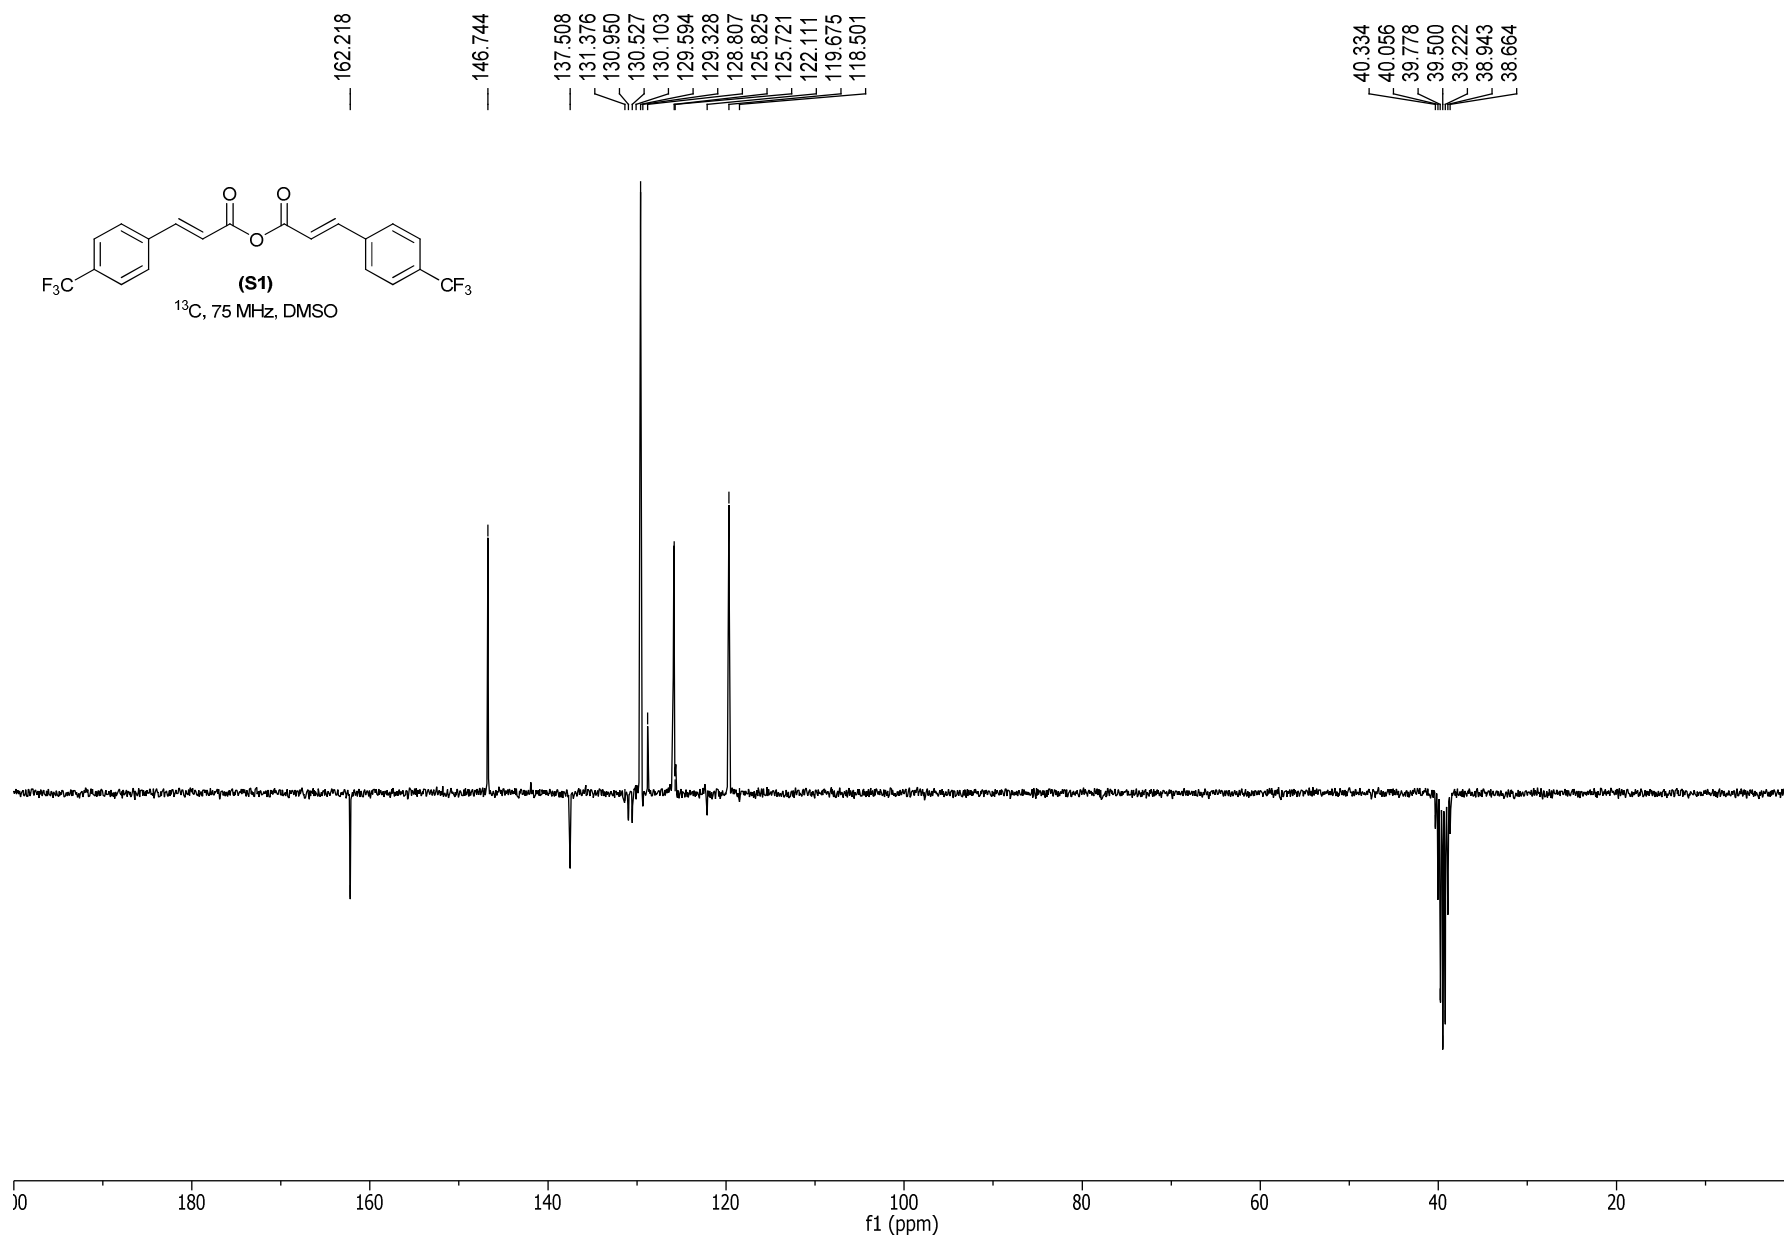

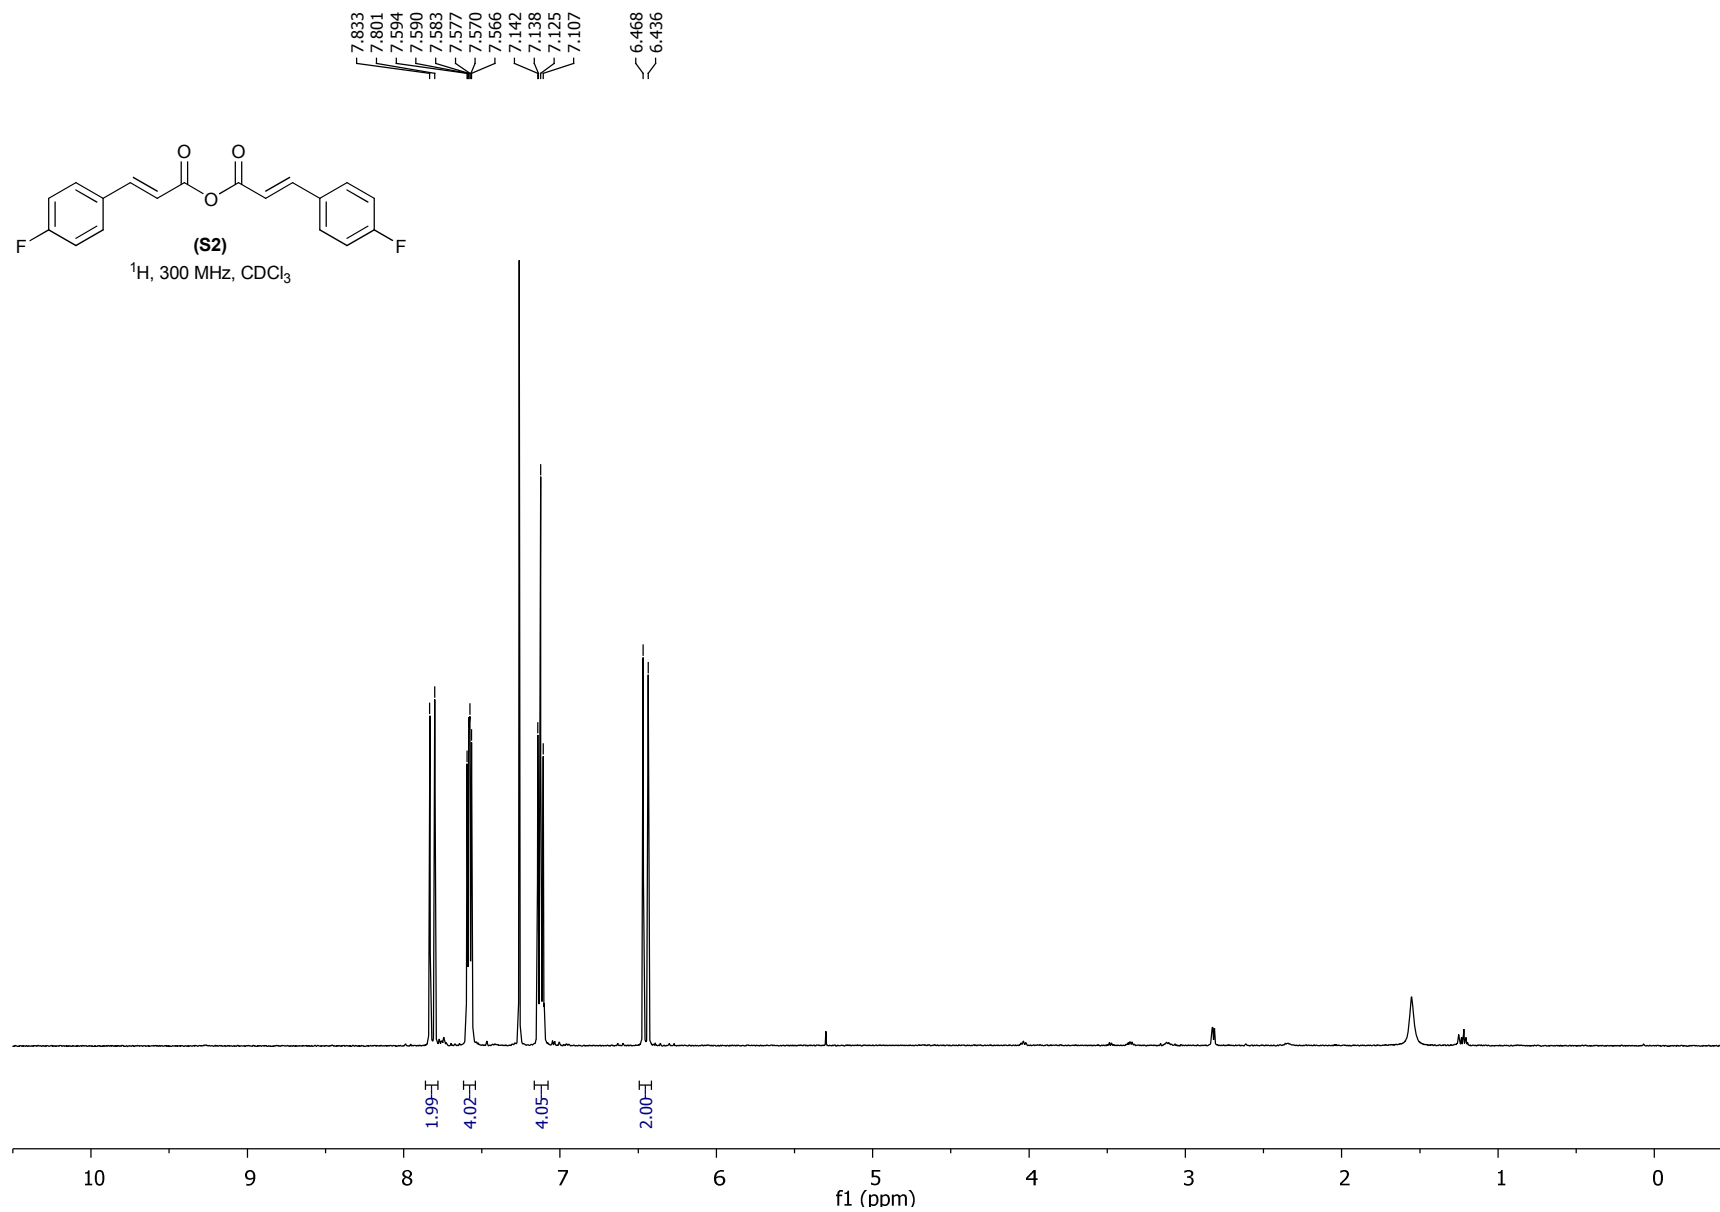

Supporting Information

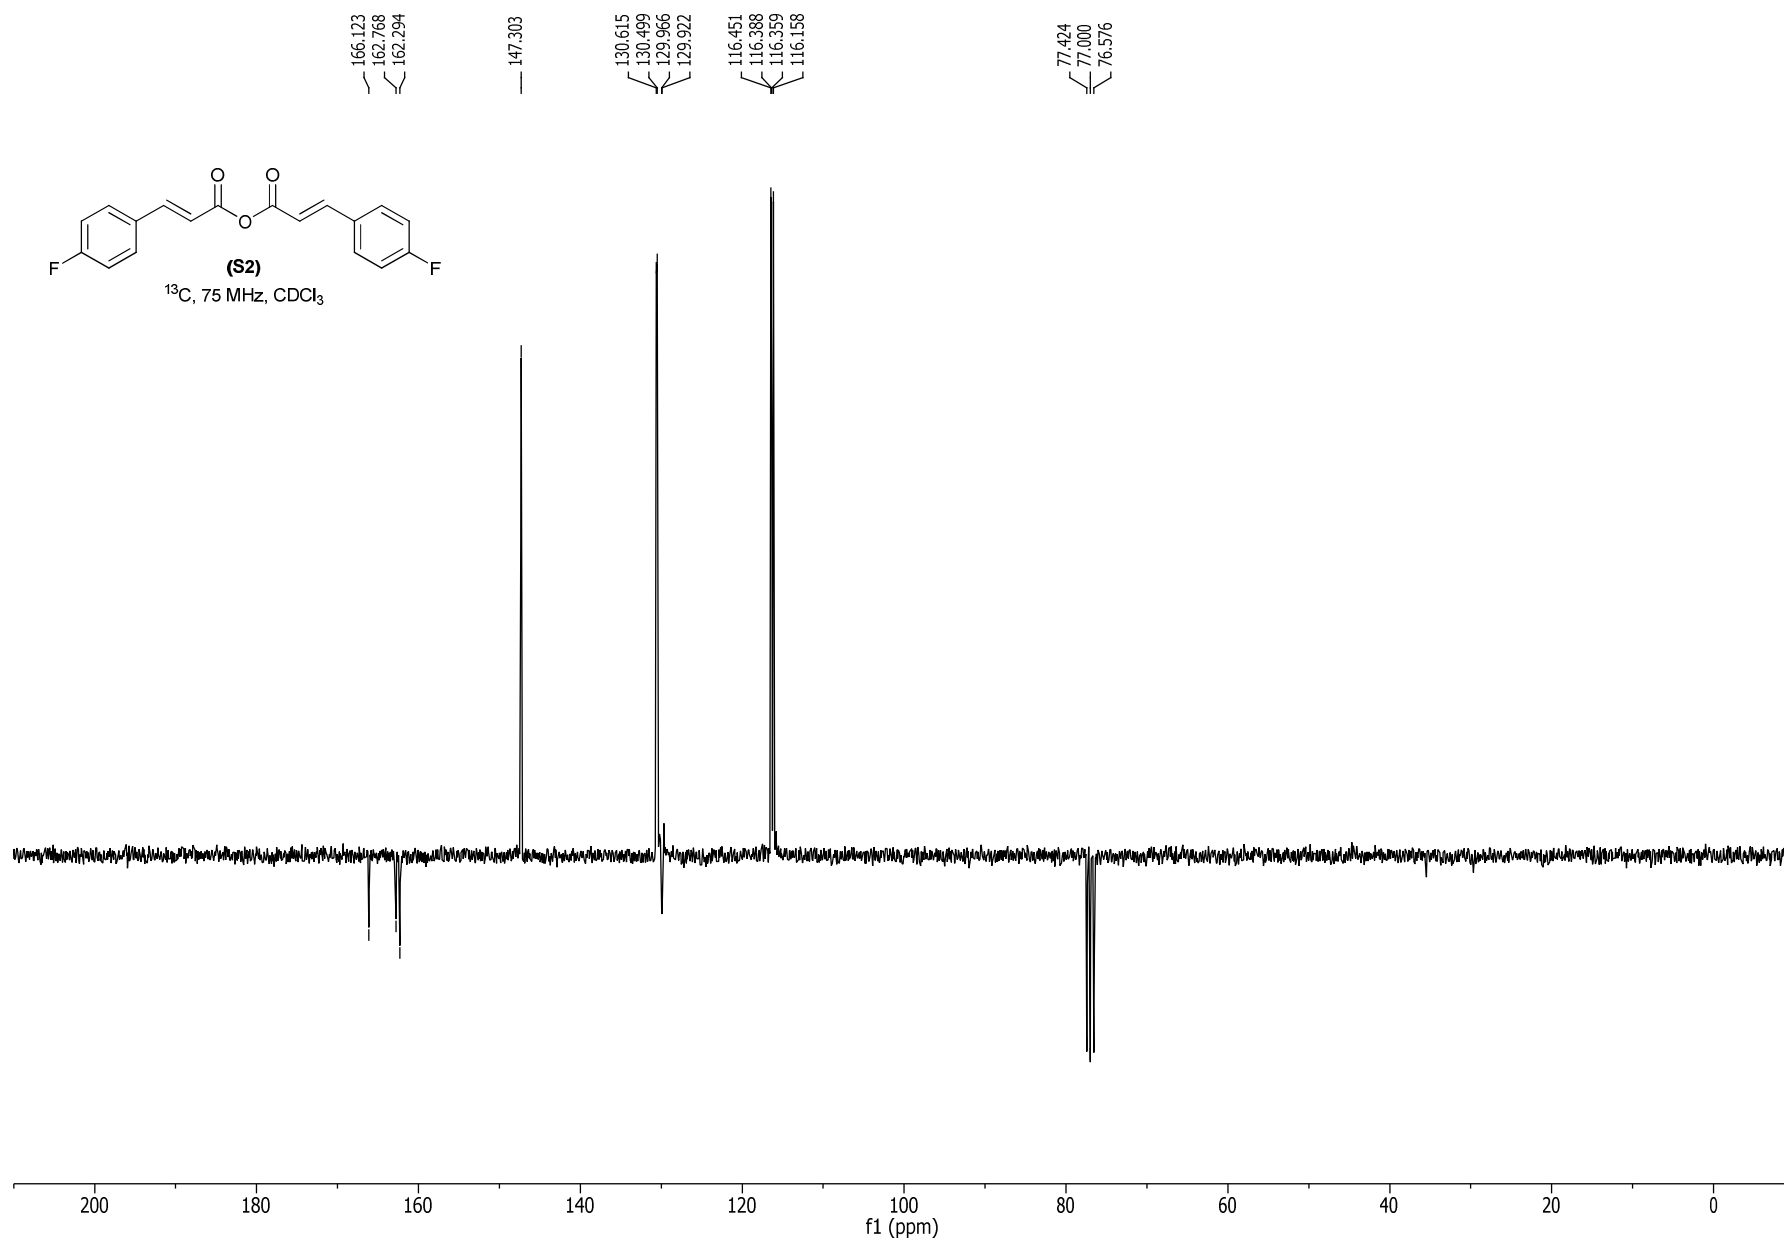

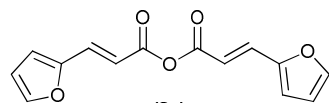

(S4)  
<sup>1</sup>H, 300 MHz, CDCl<sub>3</sub>

7.600  
7.559  
7.554  
7.549  
7.270  
6.753  
6.742  
6.540  
6.534  
6.528  
6.522  
6.412  
6.359

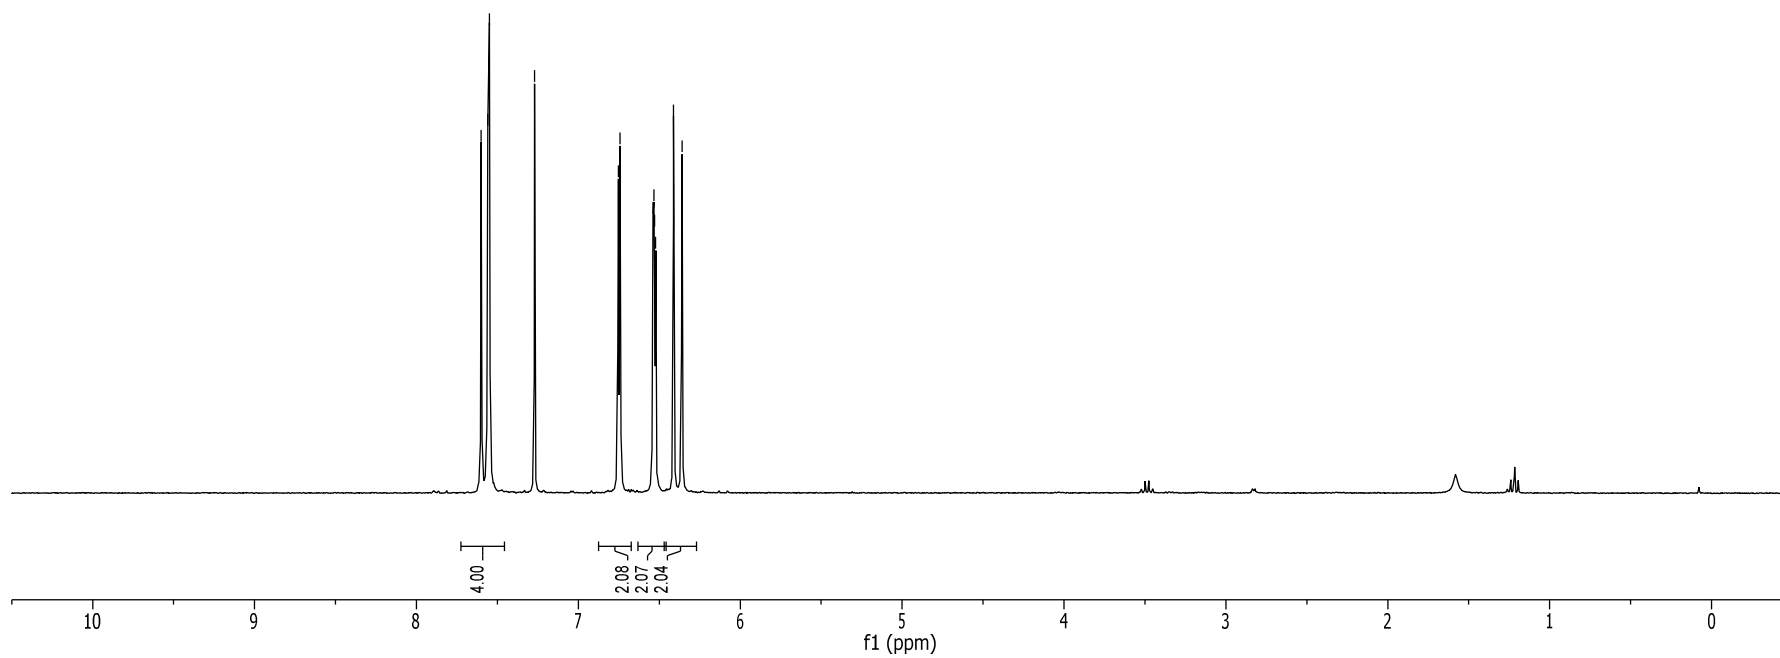

Supporting Information

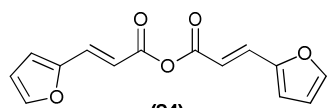

$^{13}\text{C}$ , 75 MHz,  $\text{CDCl}_3$

— 162.671  
— 150.592  
— 145.976  
— 134.321  
— 117.094  
— 114.278  
— 112.898

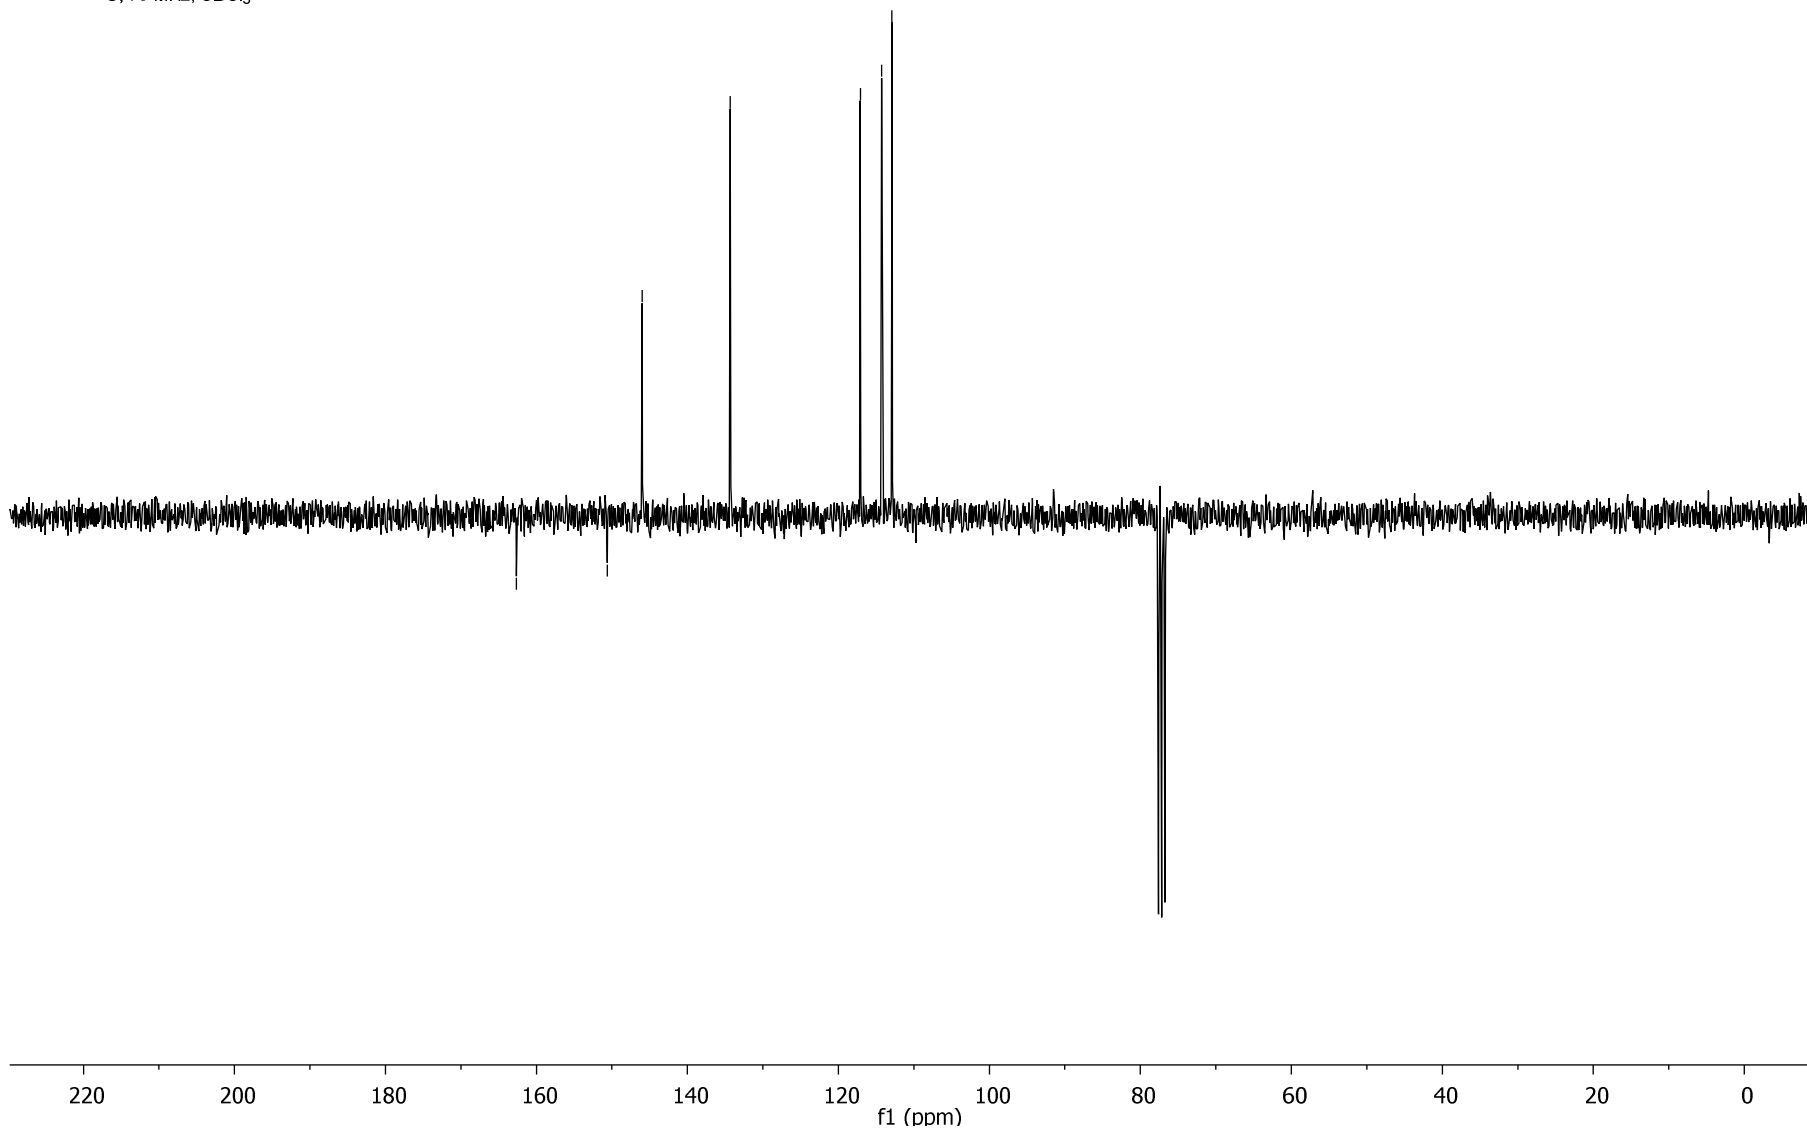

Supporting Information

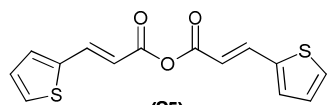

$^1\text{H}$ , 300 MHz,  $\text{CDCl}_3$

7.967  
7.915  
7.487  
7.470  
7.363  
7.351  
7.260  
7.119  
7.107  
7.102  
7.090  
6.323  
6.271

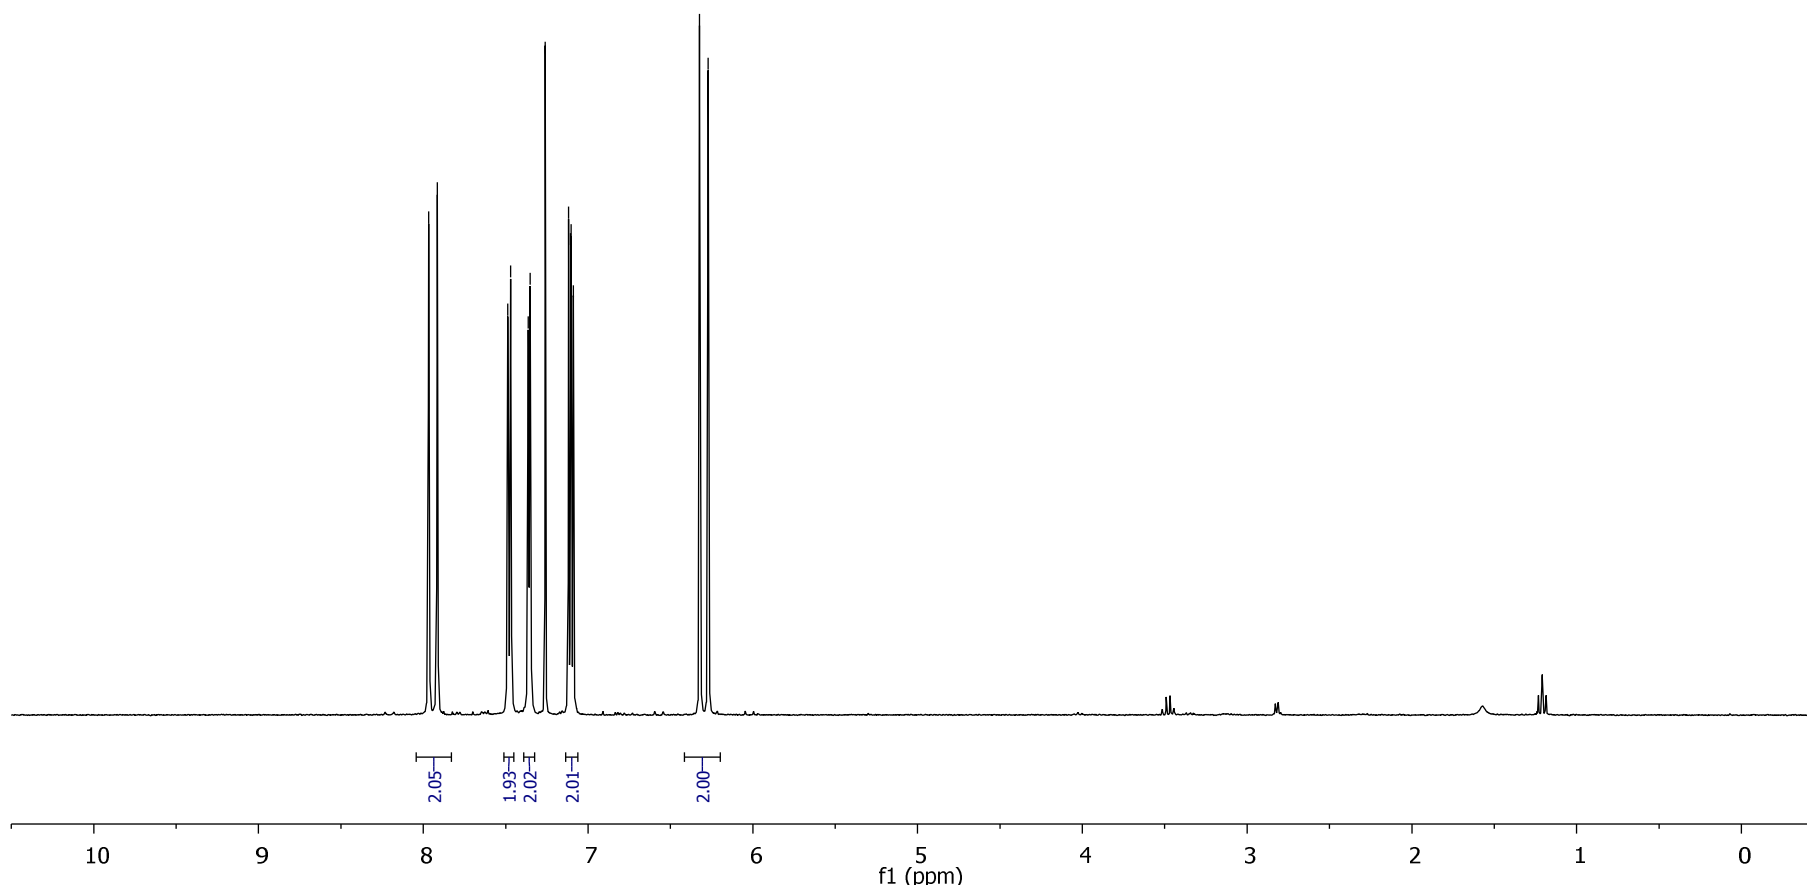

Supporting Information

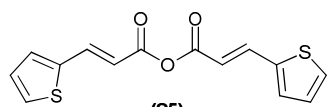

$^{13}\text{C}$ , 75 MHz,  $\text{CDCl}_3$

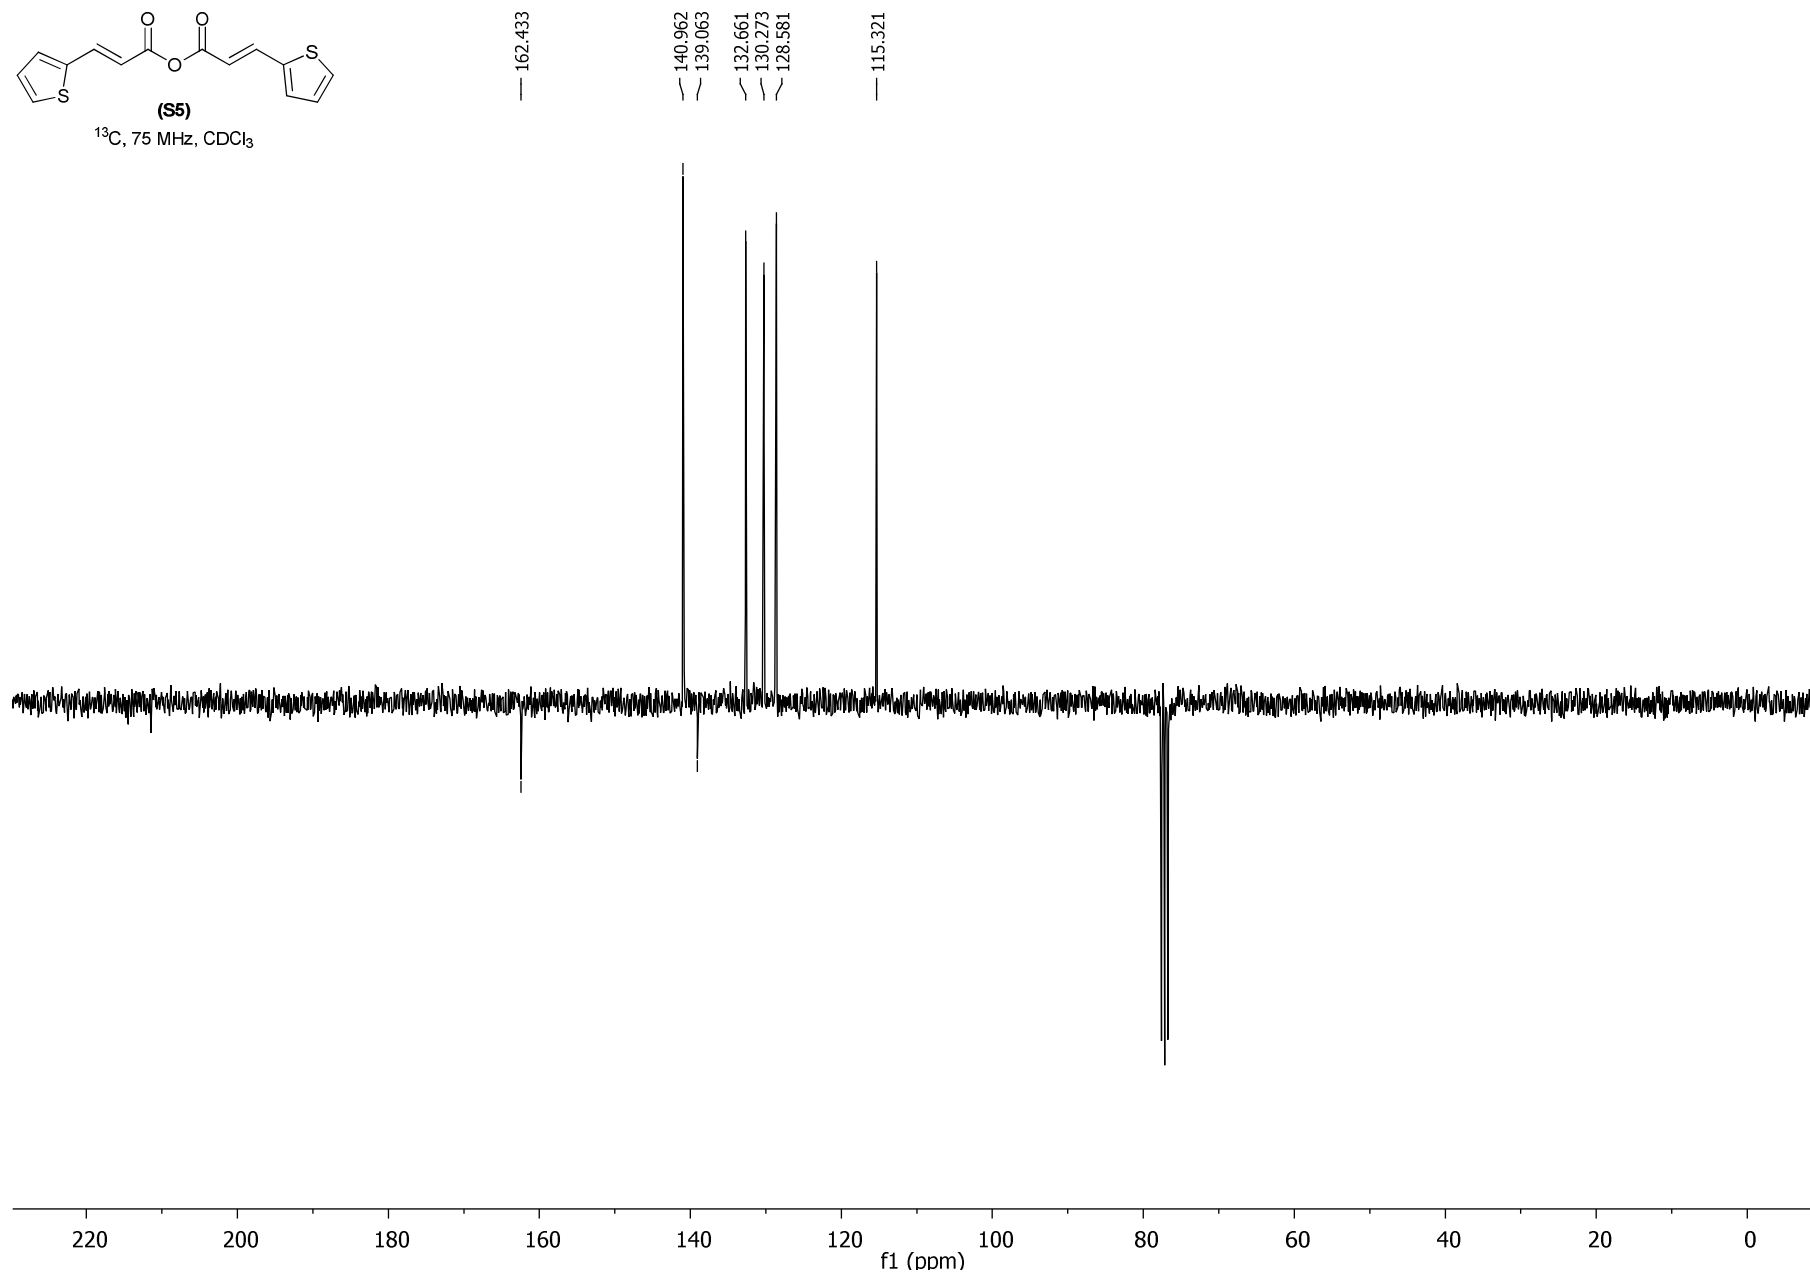



Supporting Information

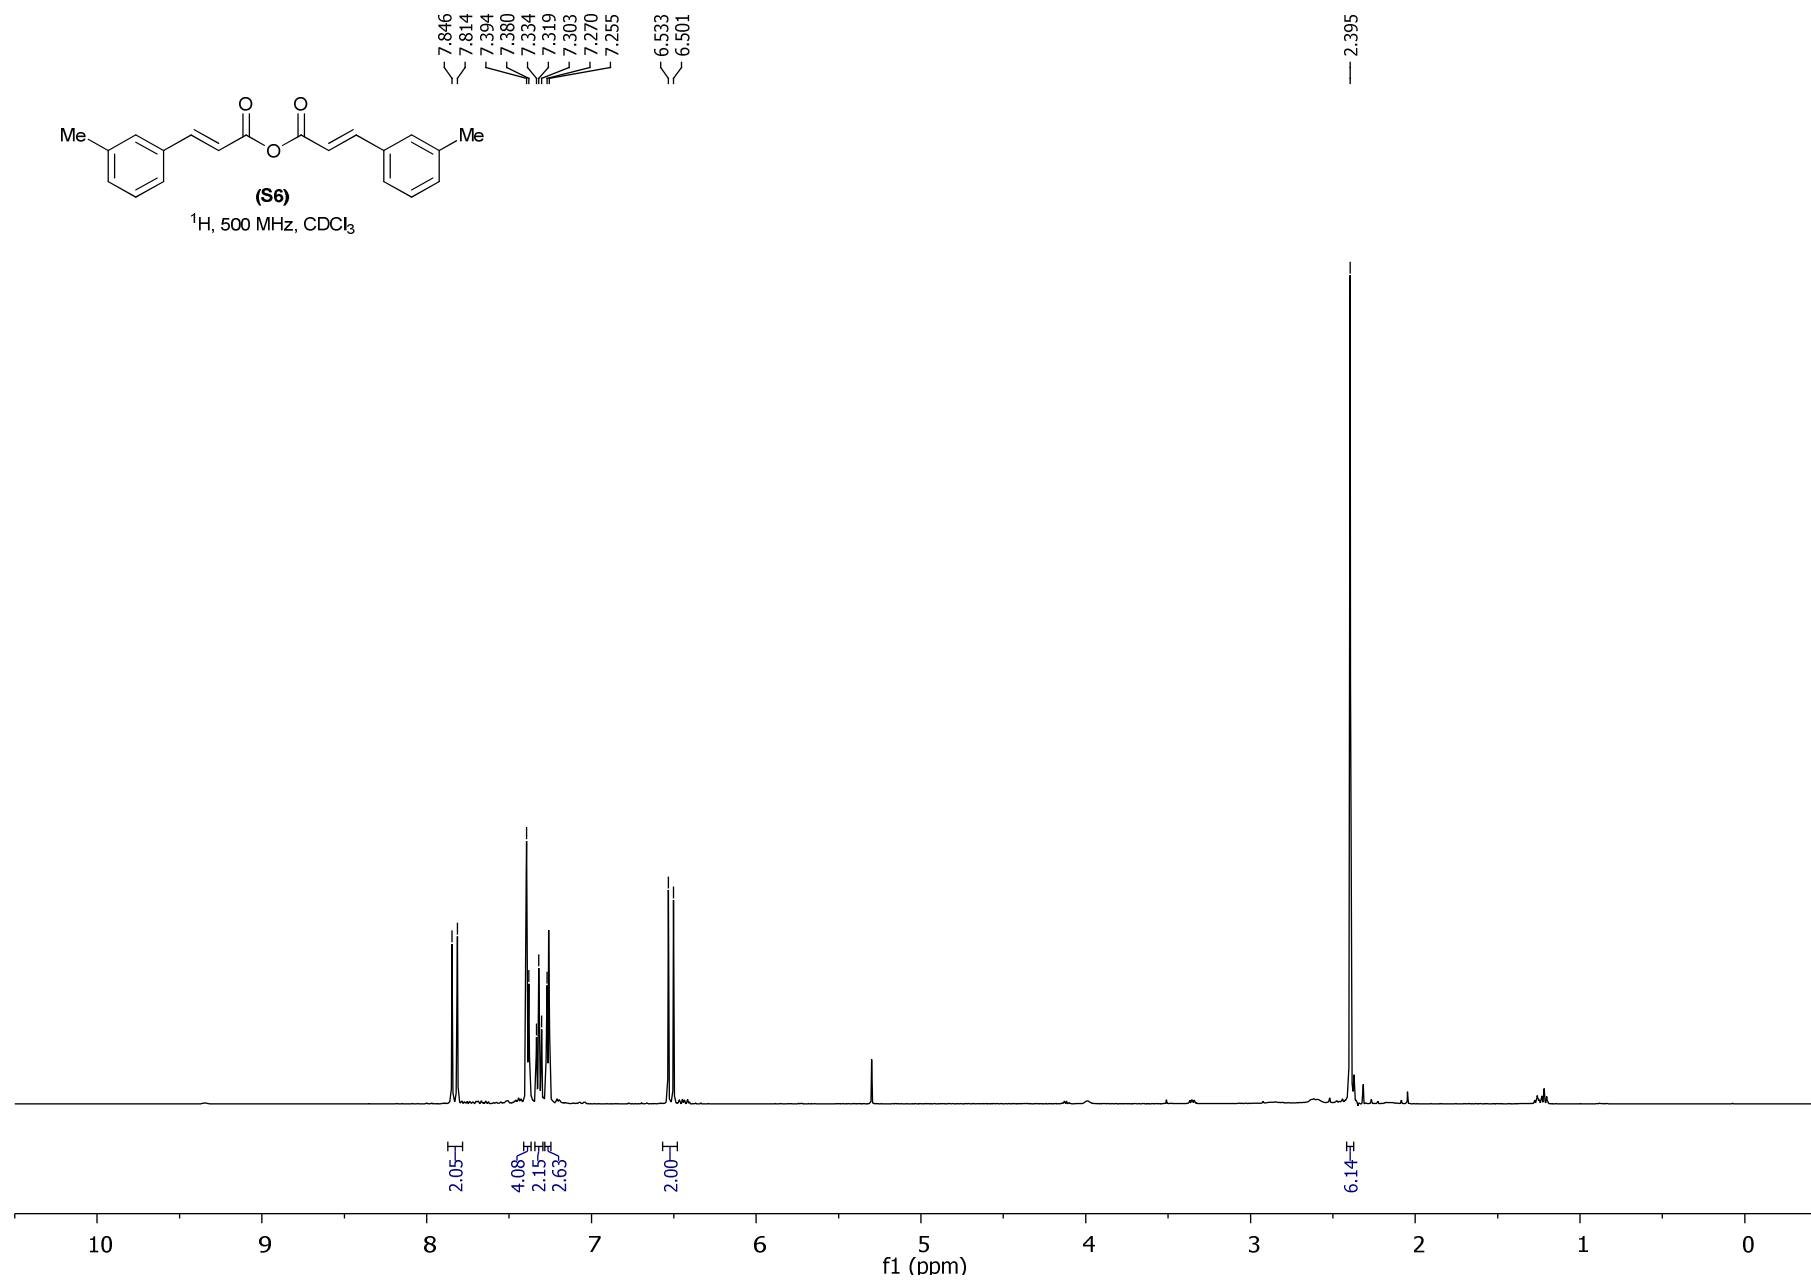

Supporting Information

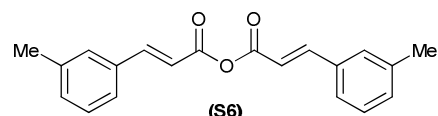

$^{13}\text{C}$ , 75 MHz,  $\text{CDCl}_3$

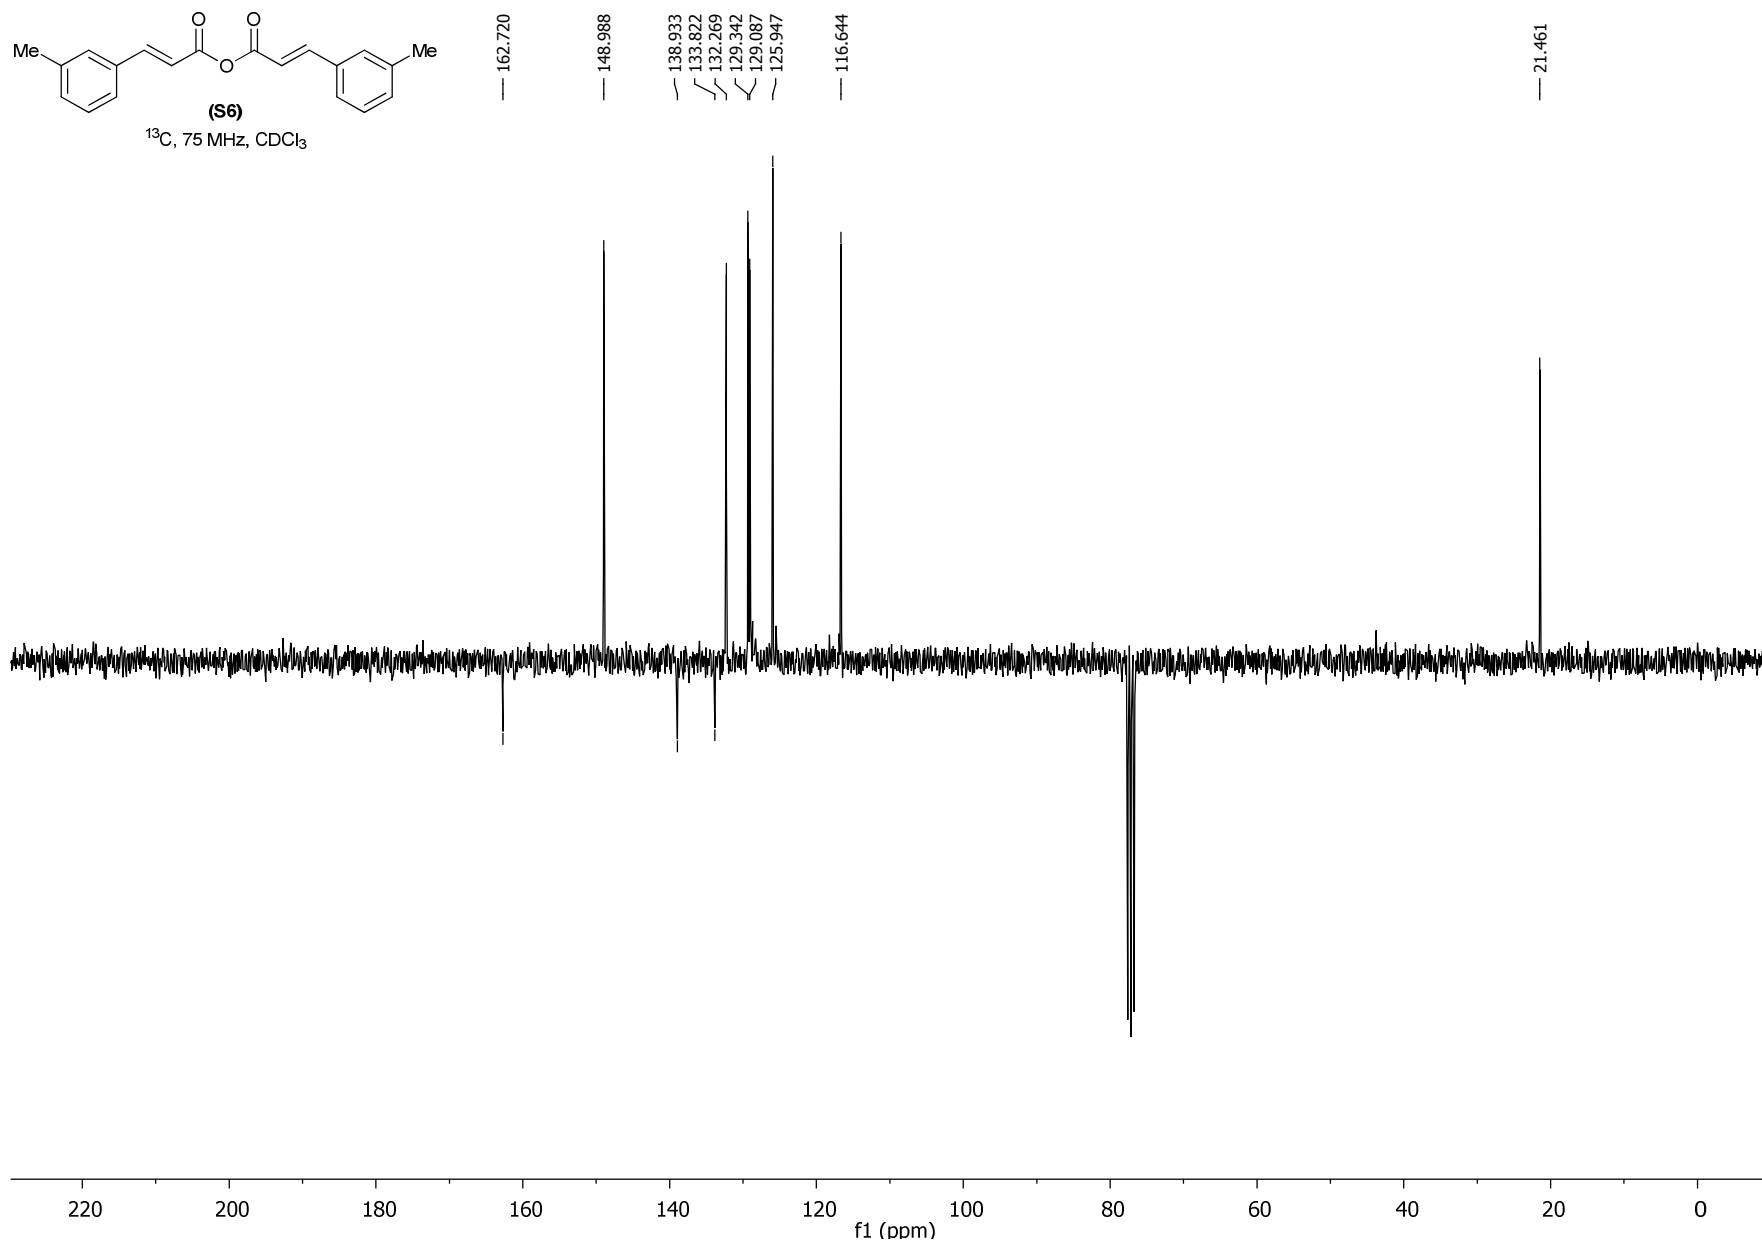

Supporting Information

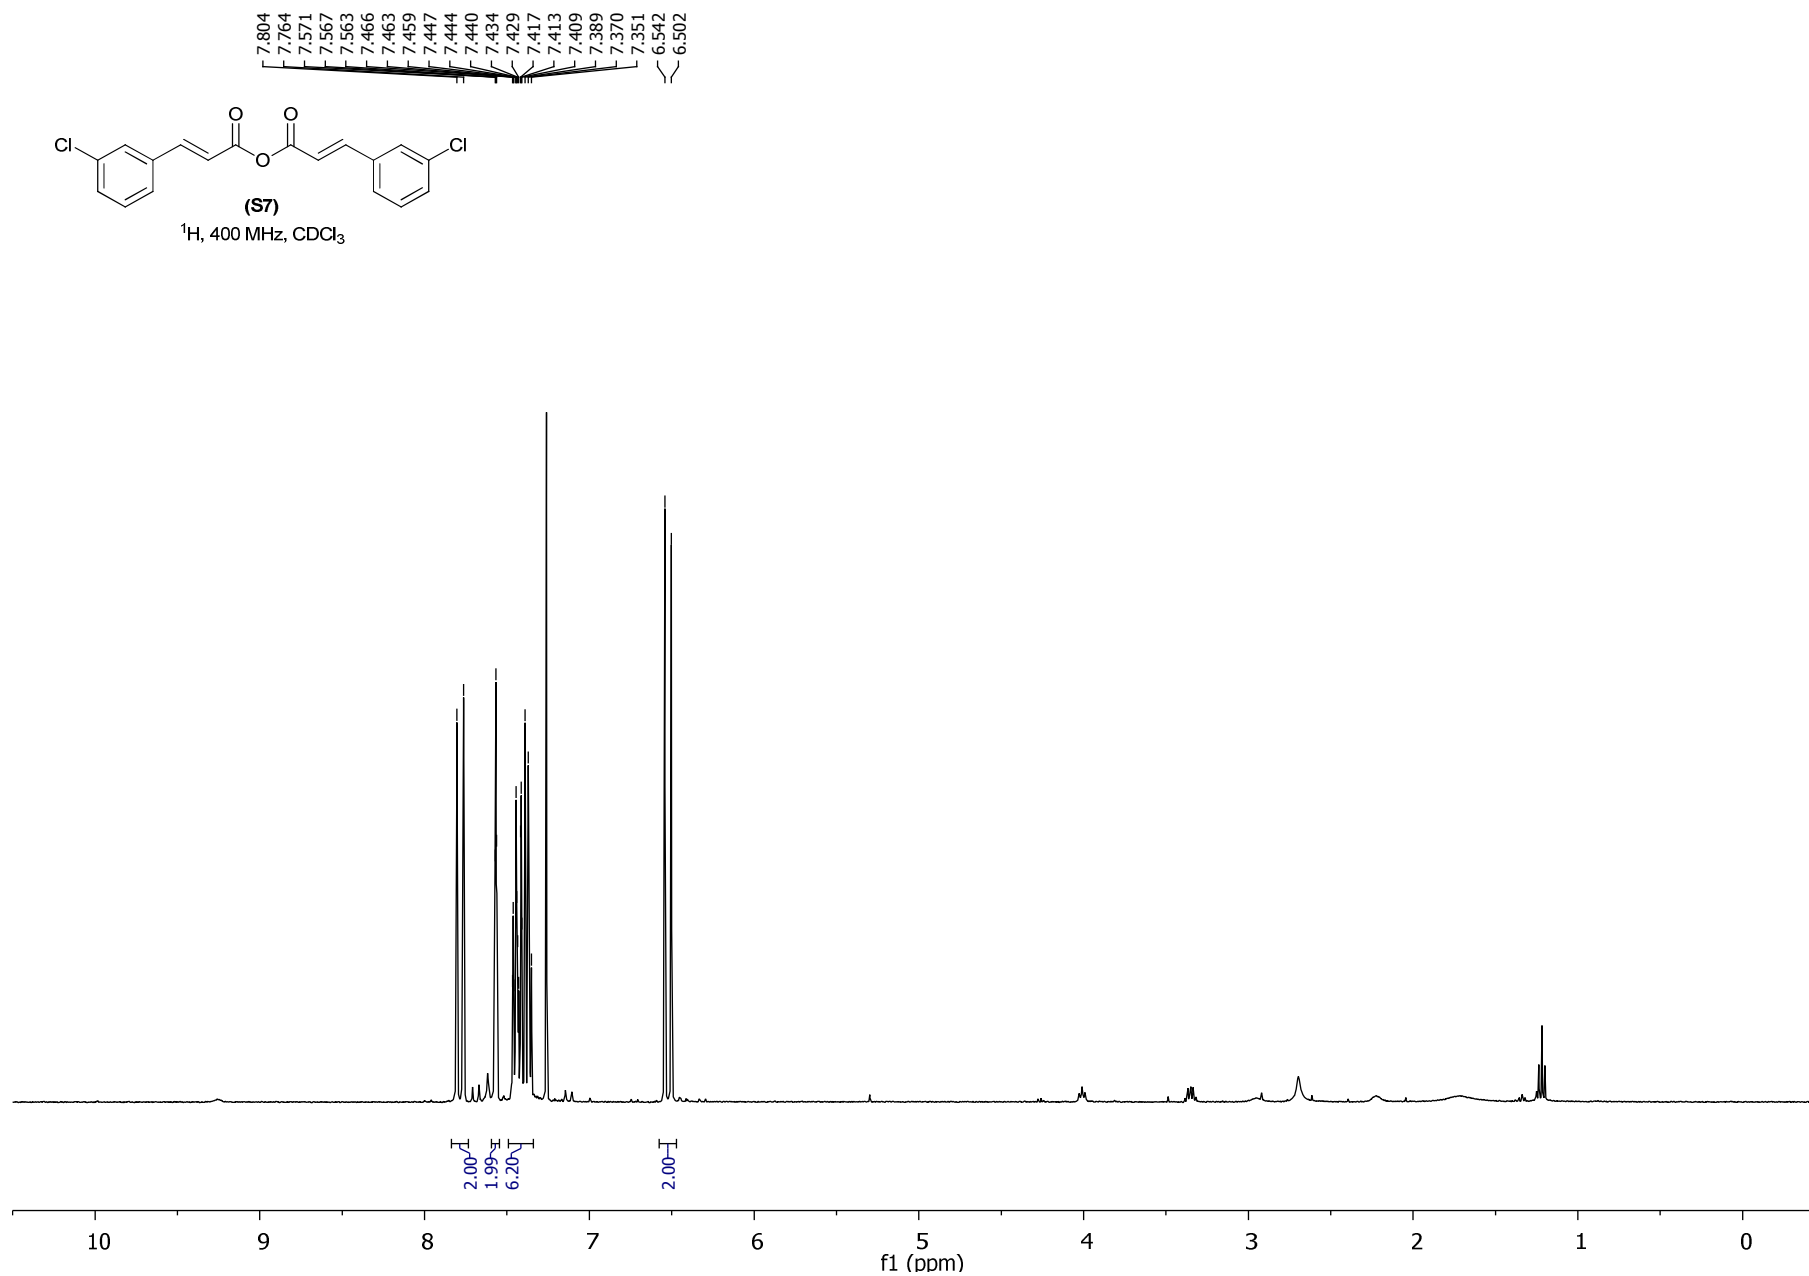

Supporting Information

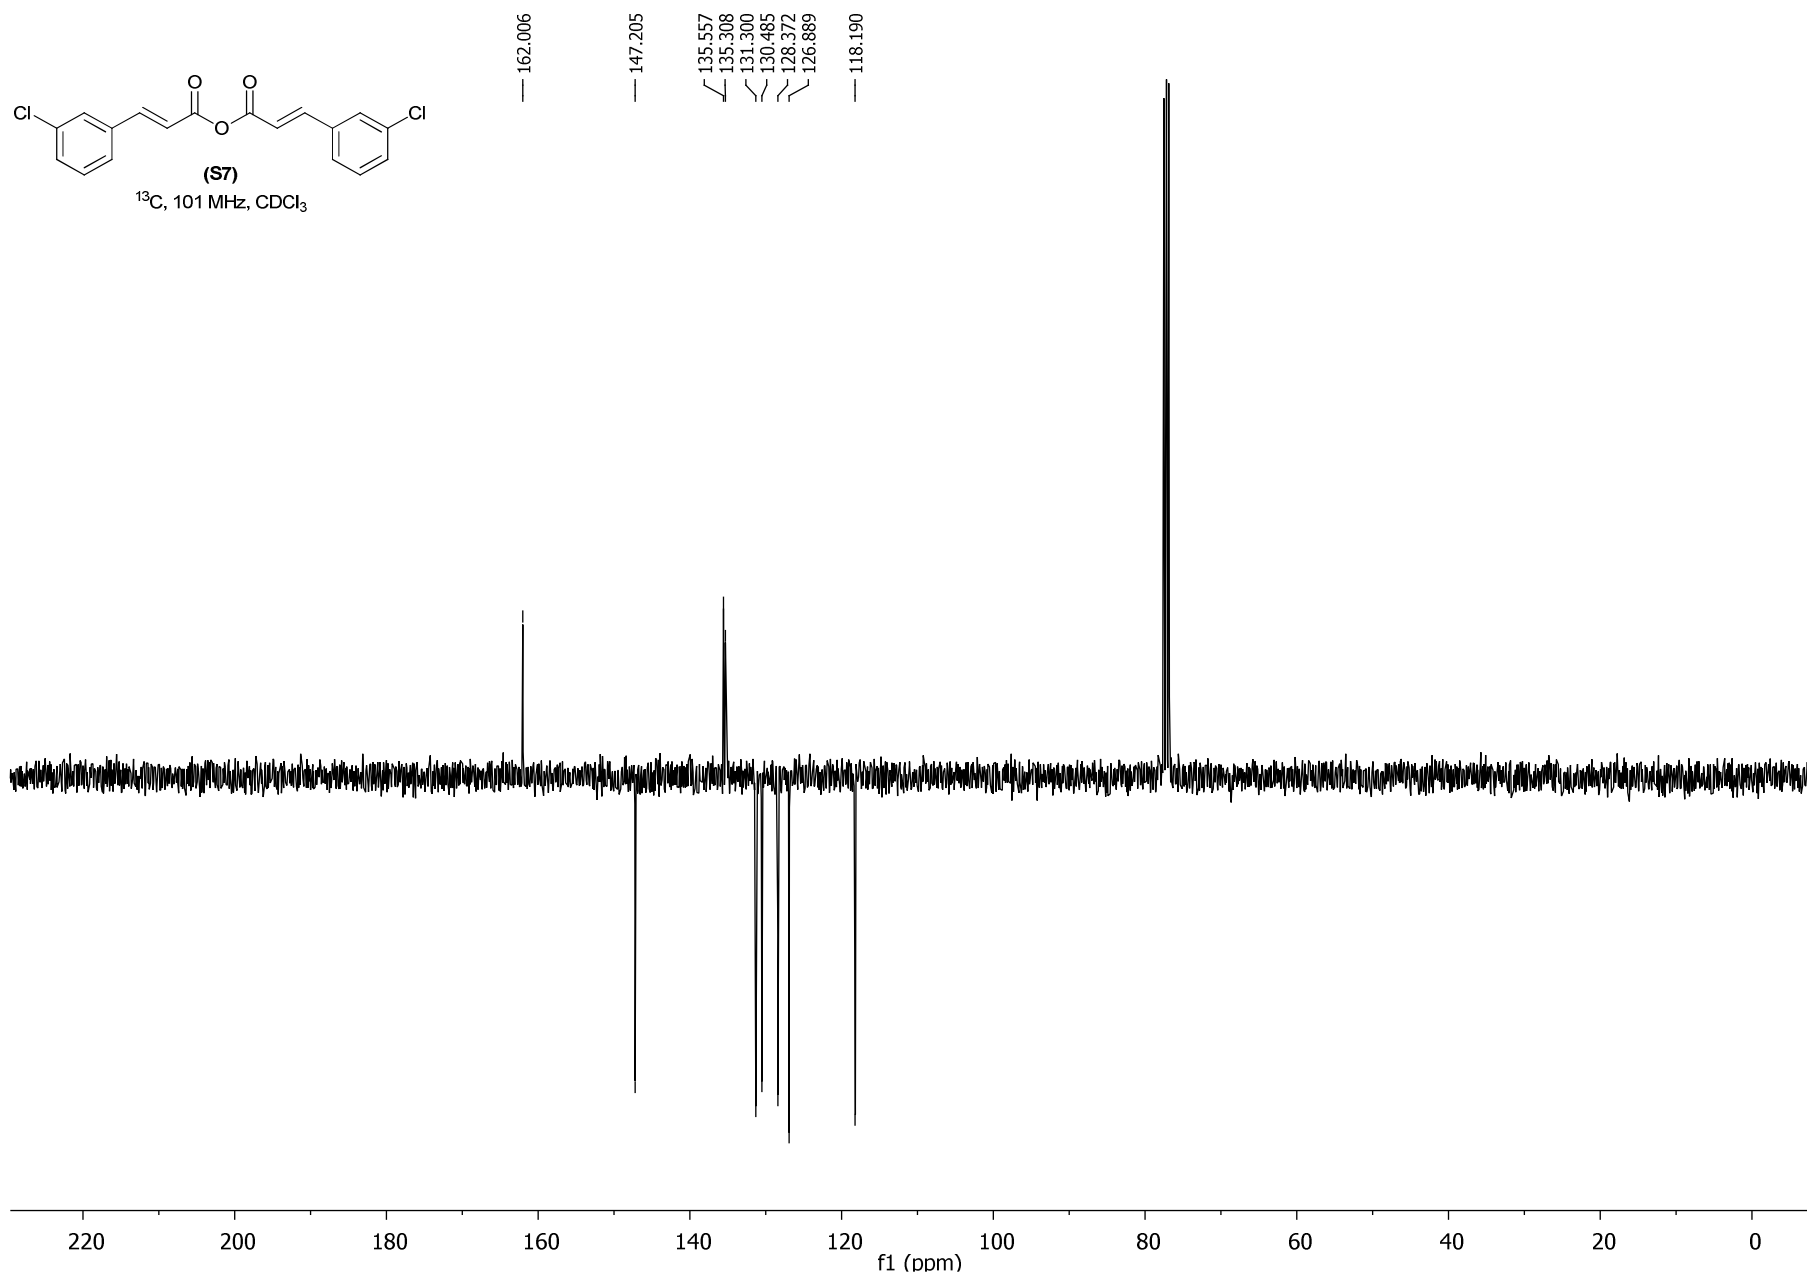

Supporting Information

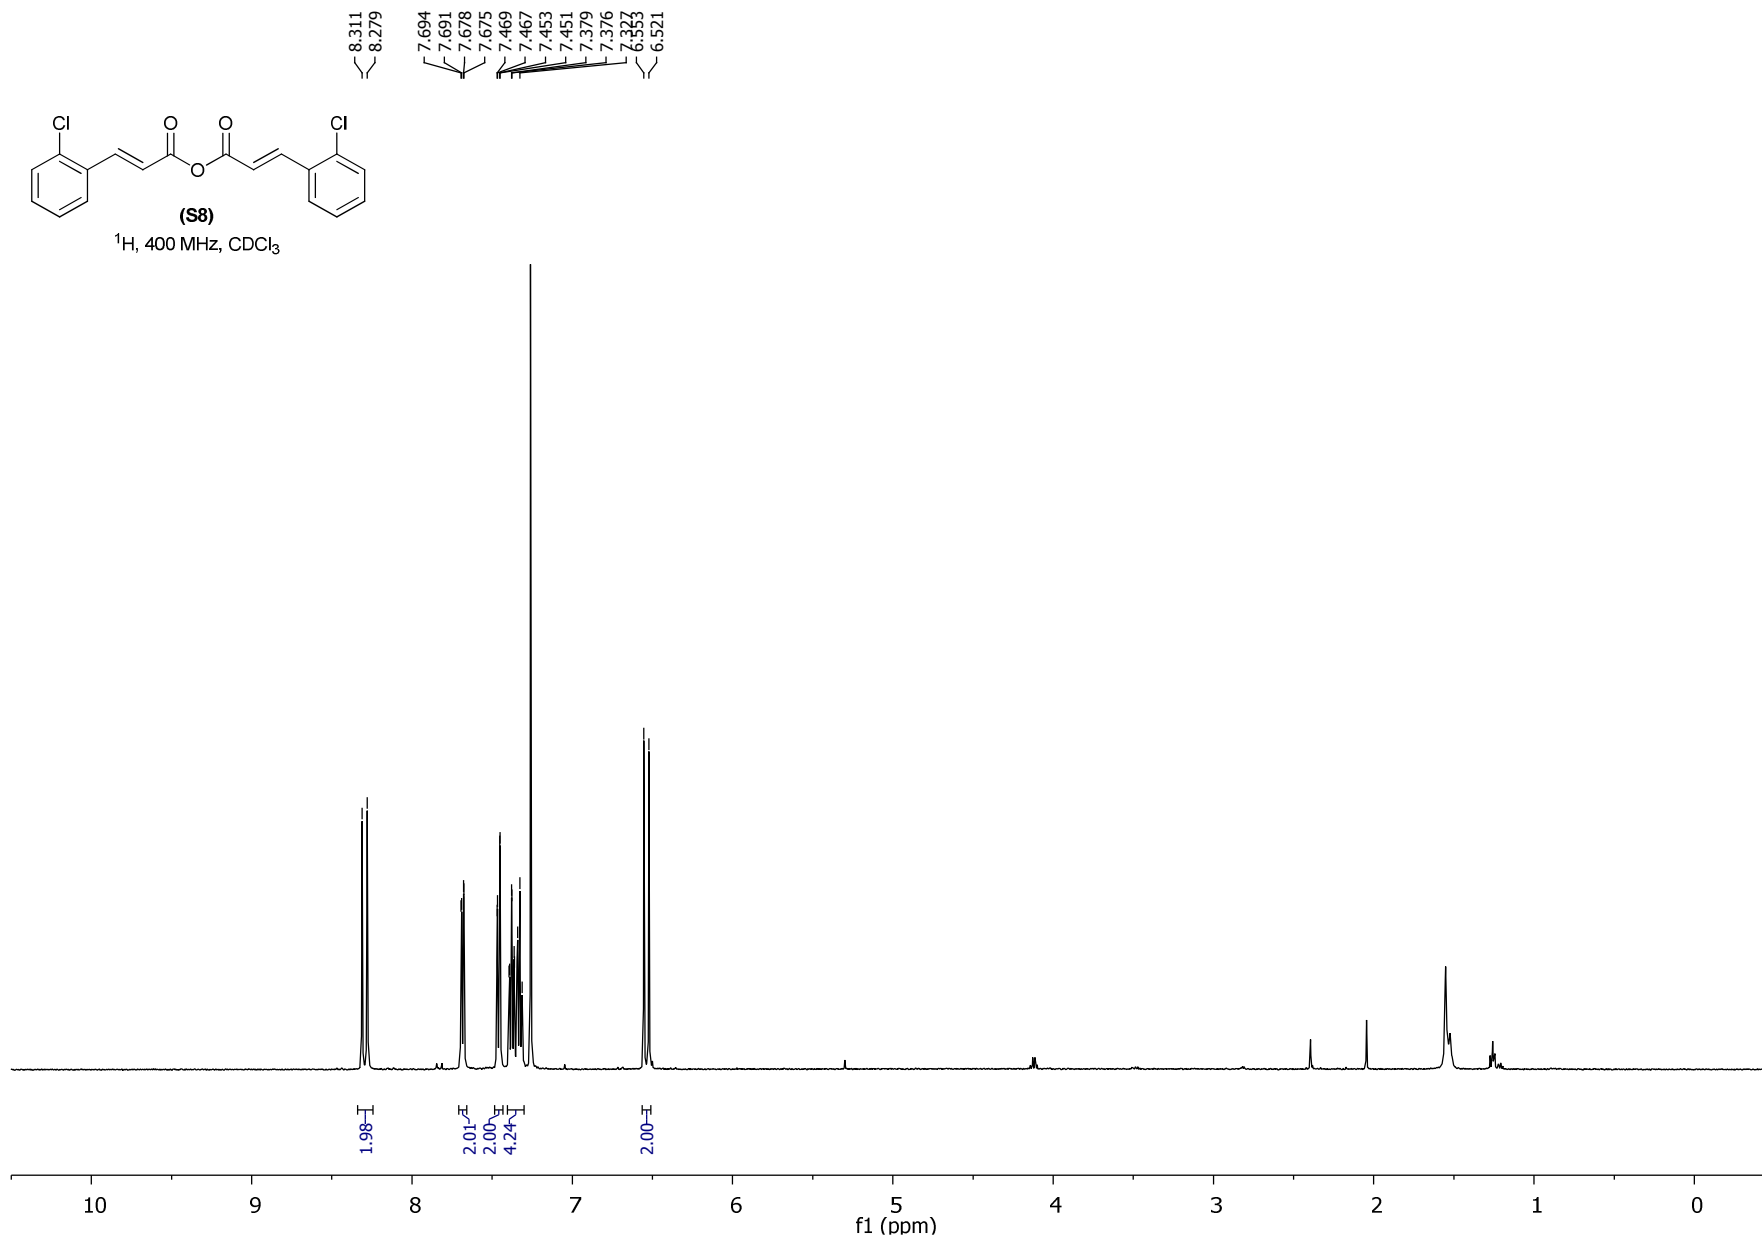

Supporting Information

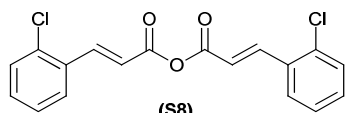

$^{13}\text{C}$ , 101 MHz,  $\text{CDCl}_3$

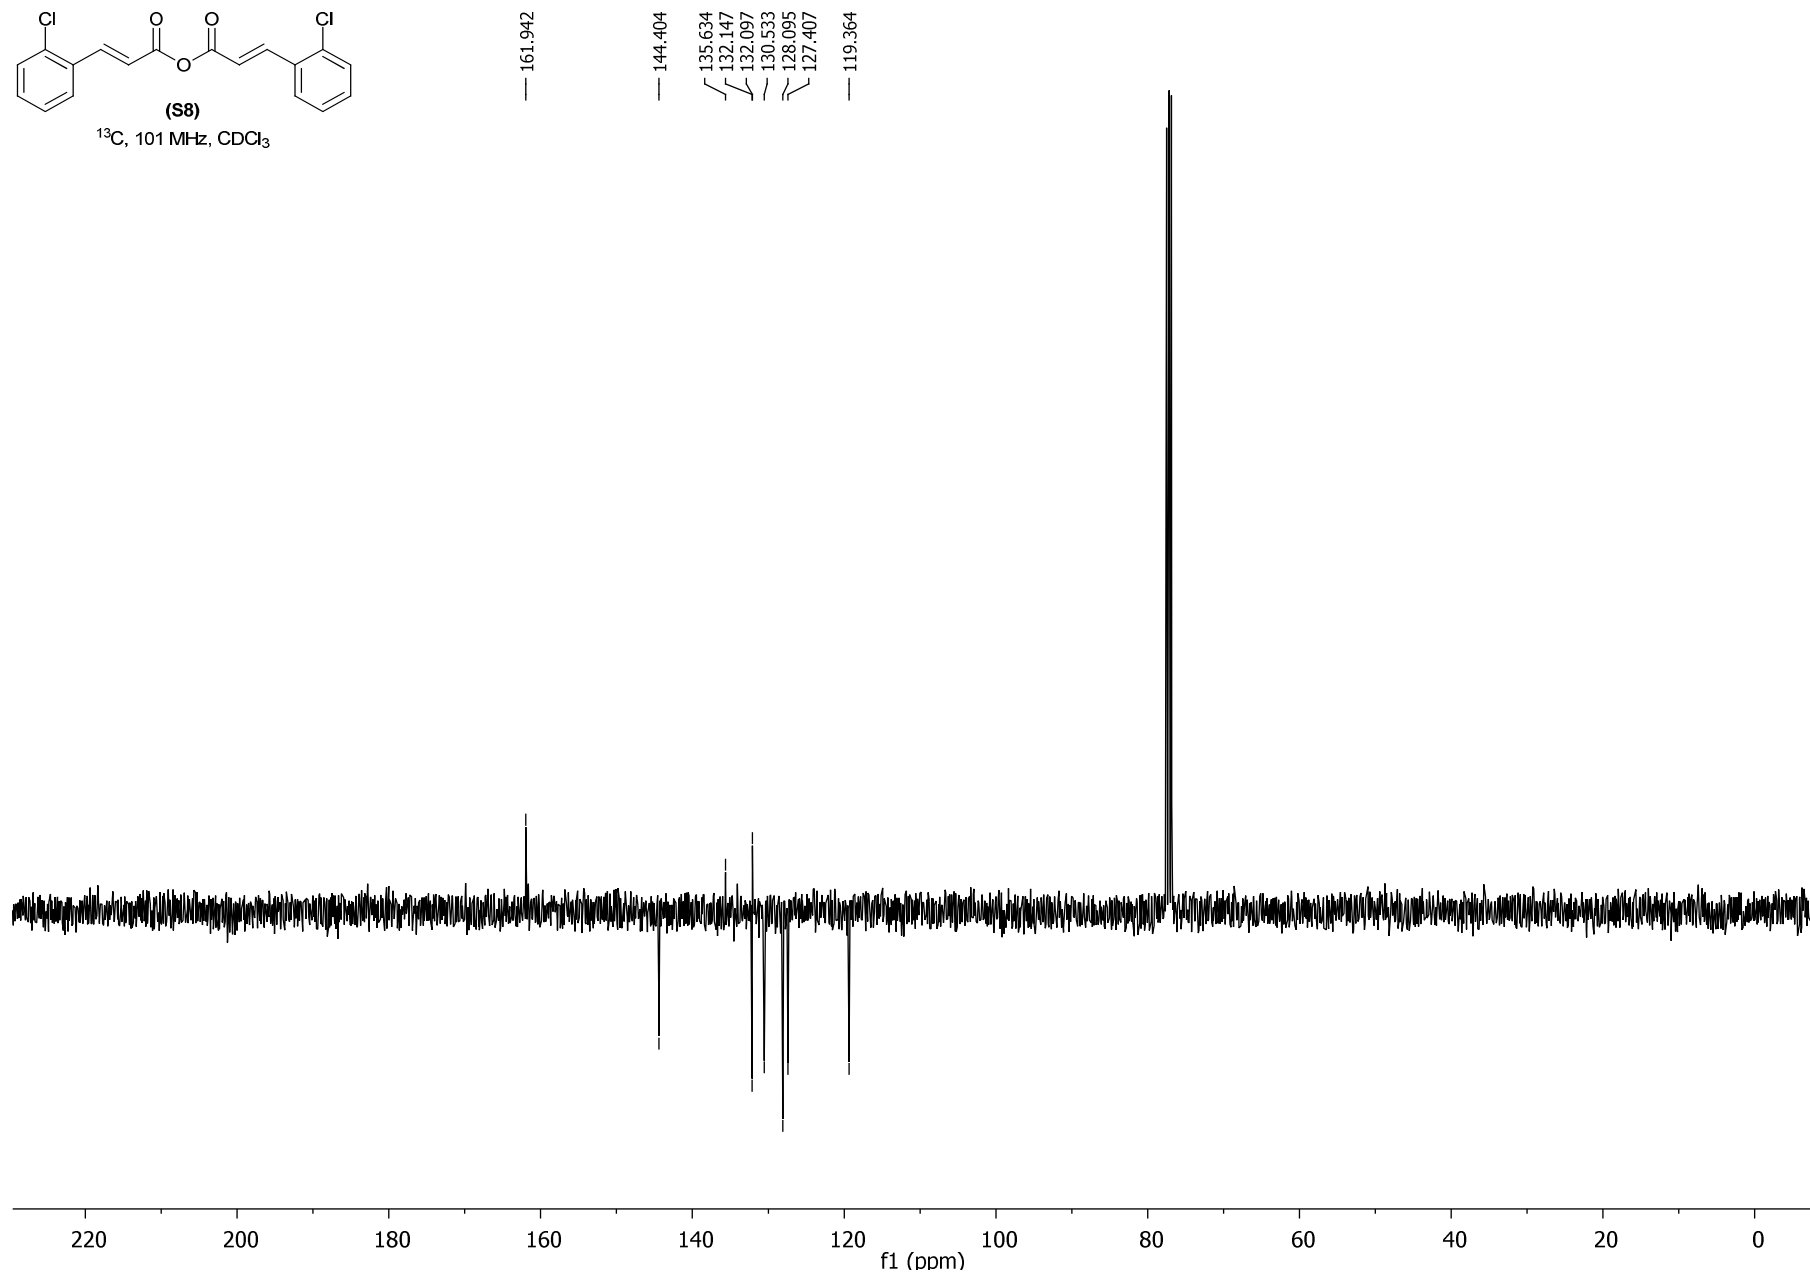

Supporting Information

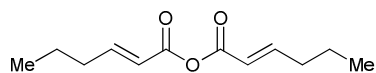

(S10)

<sup>1</sup>H, 300 MHz, CDCl<sub>3</sub>

7.141  
7.118  
7.094  
7.089  
7.066  
7.043

5.873  
5.868  
5.863  
5.821  
5.816  
5.811

2.244  
2.239  
2.220  
2.215  
2.195  
2.191  
2.172  
2.166

1.517  
1.493  
1.468  
1.443  
1.419  
0.923  
0.911  
0.899  
0.886

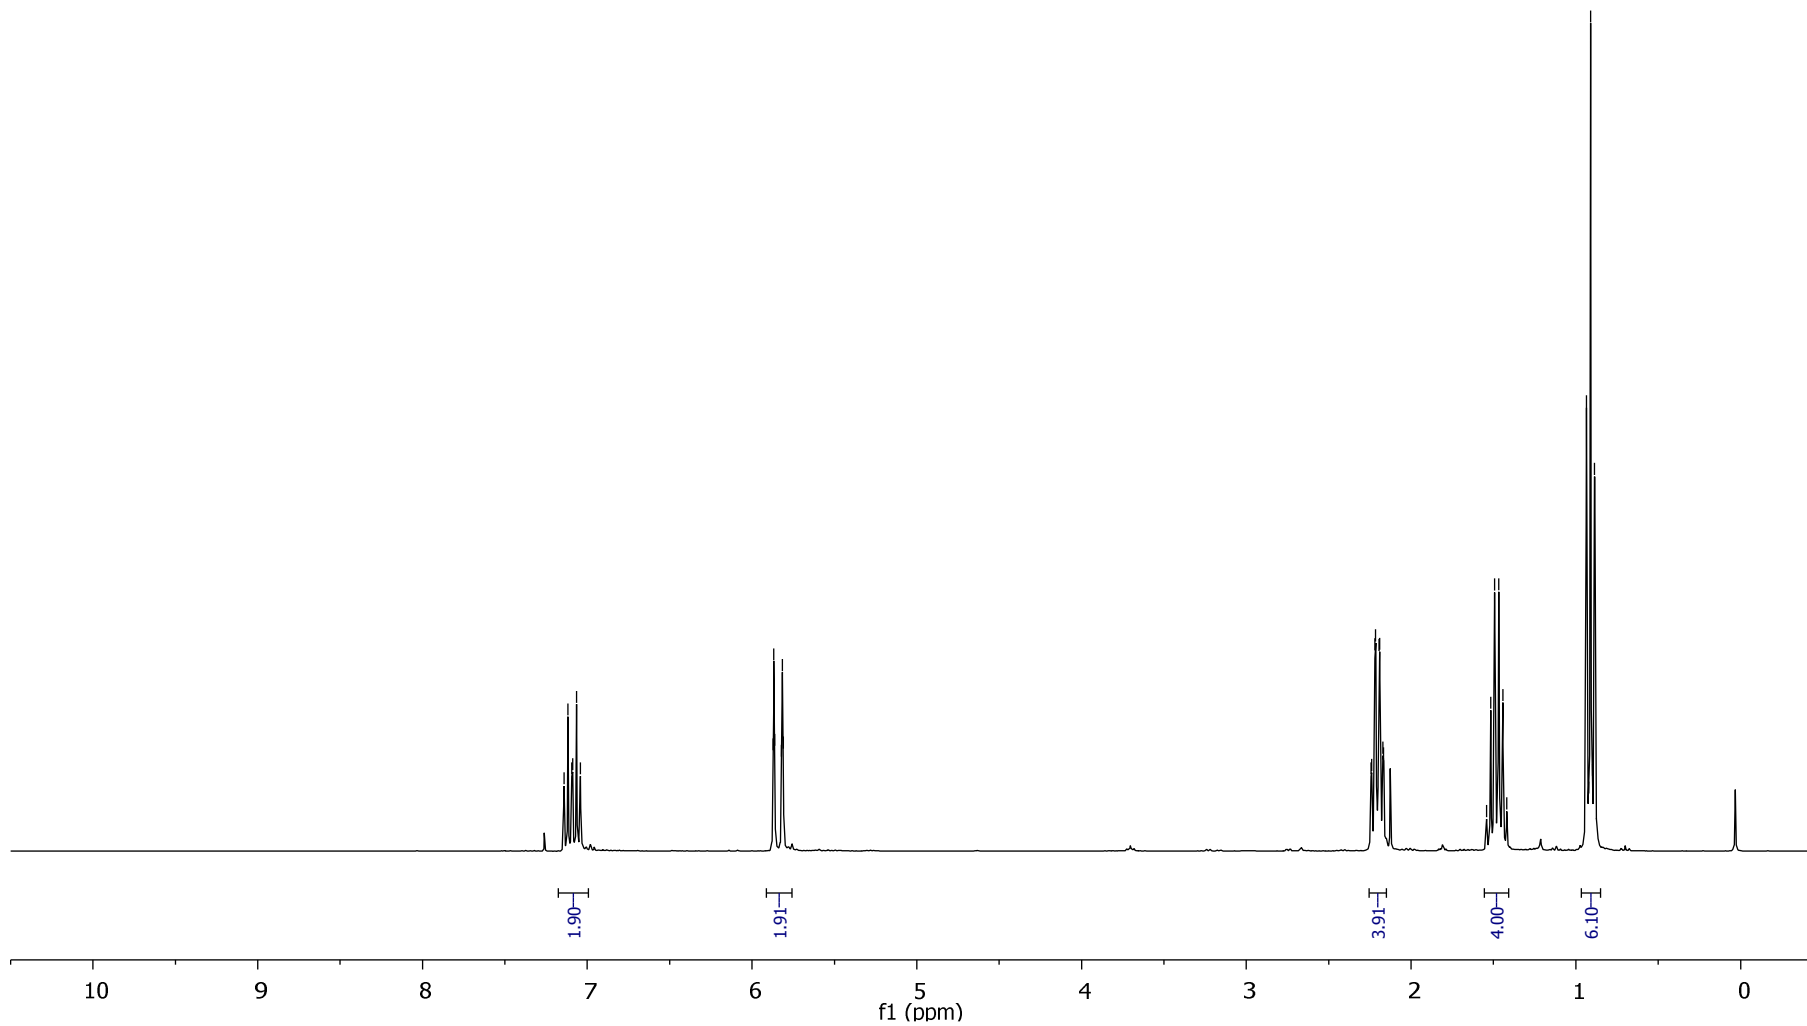

Supporting Information

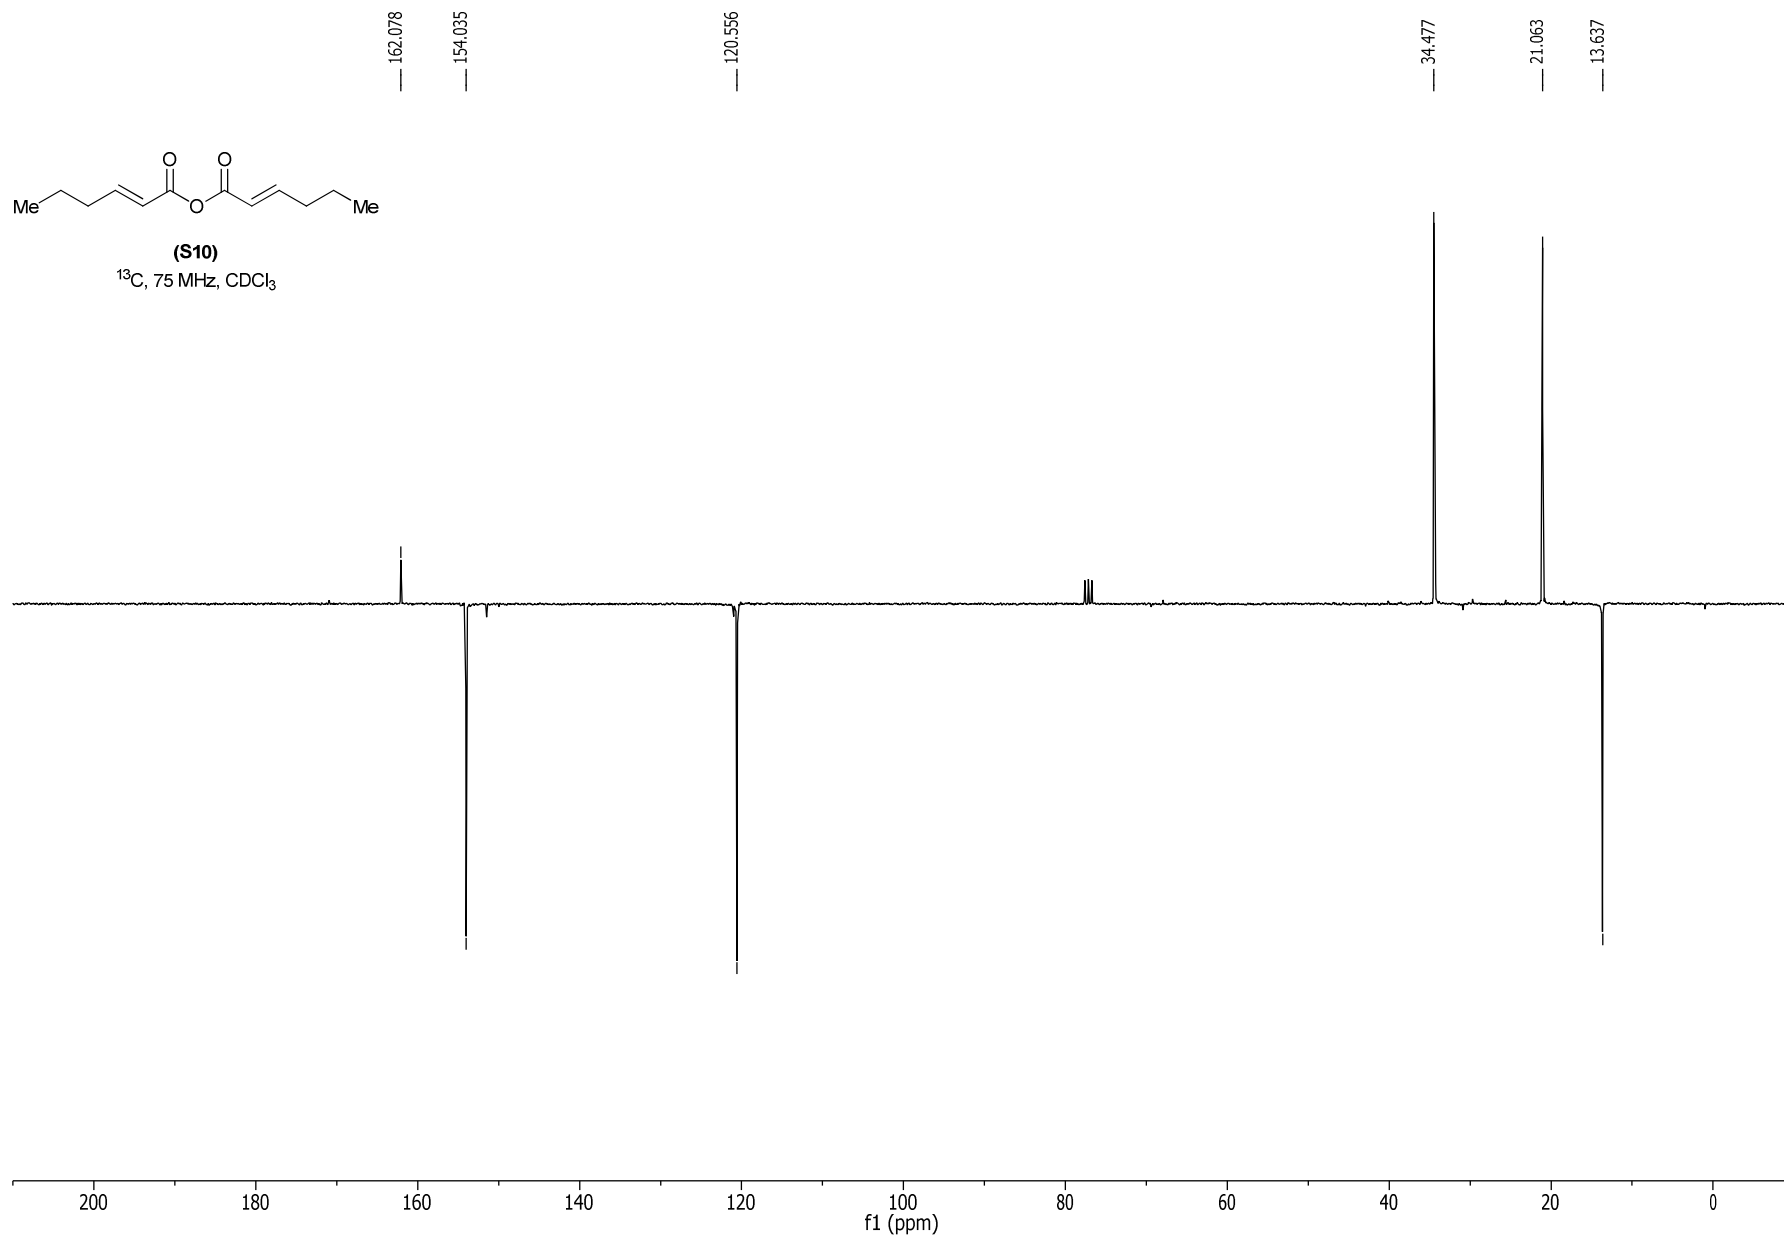



7.648  
7.645  
7.641  
7.636  
7.631  
7.629  
7.386  
7.383  
7.381  
7.378  
7.375  
7.374  
7.370  
7.270  
7.128  
7.097  
5.861  
5.830

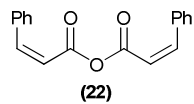

$^1\text{H}$ , 400 MHz,  $\text{CDCl}_3$

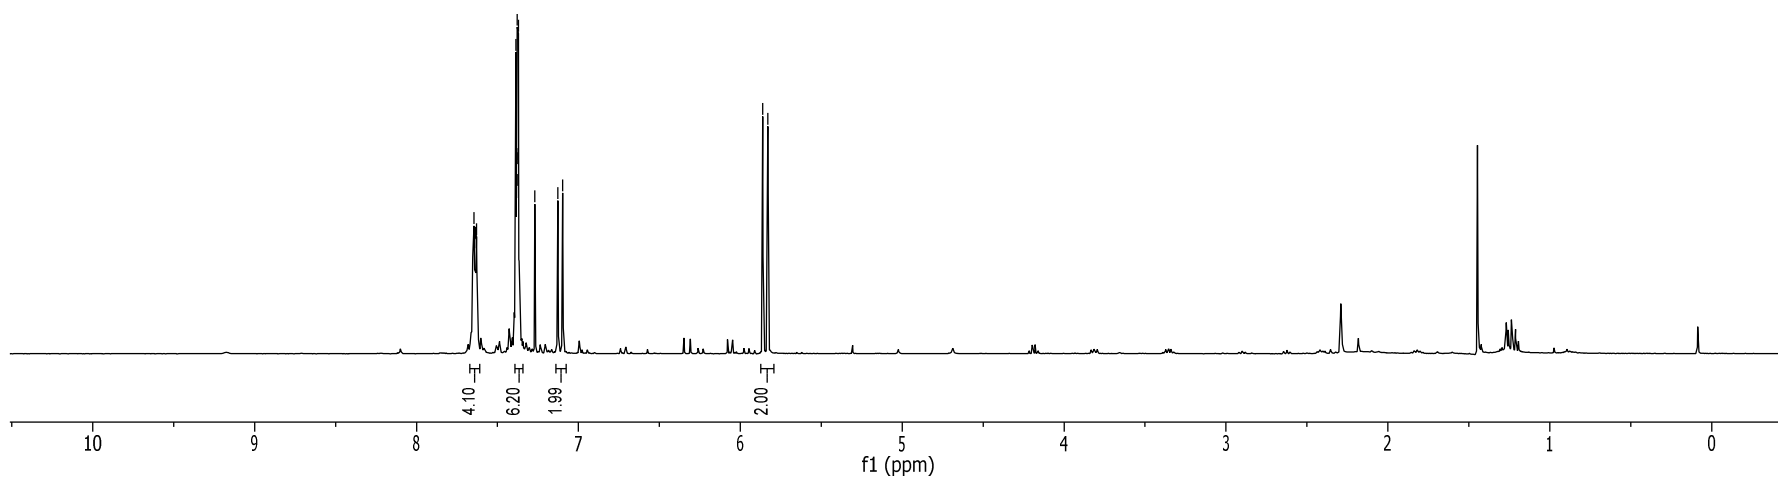

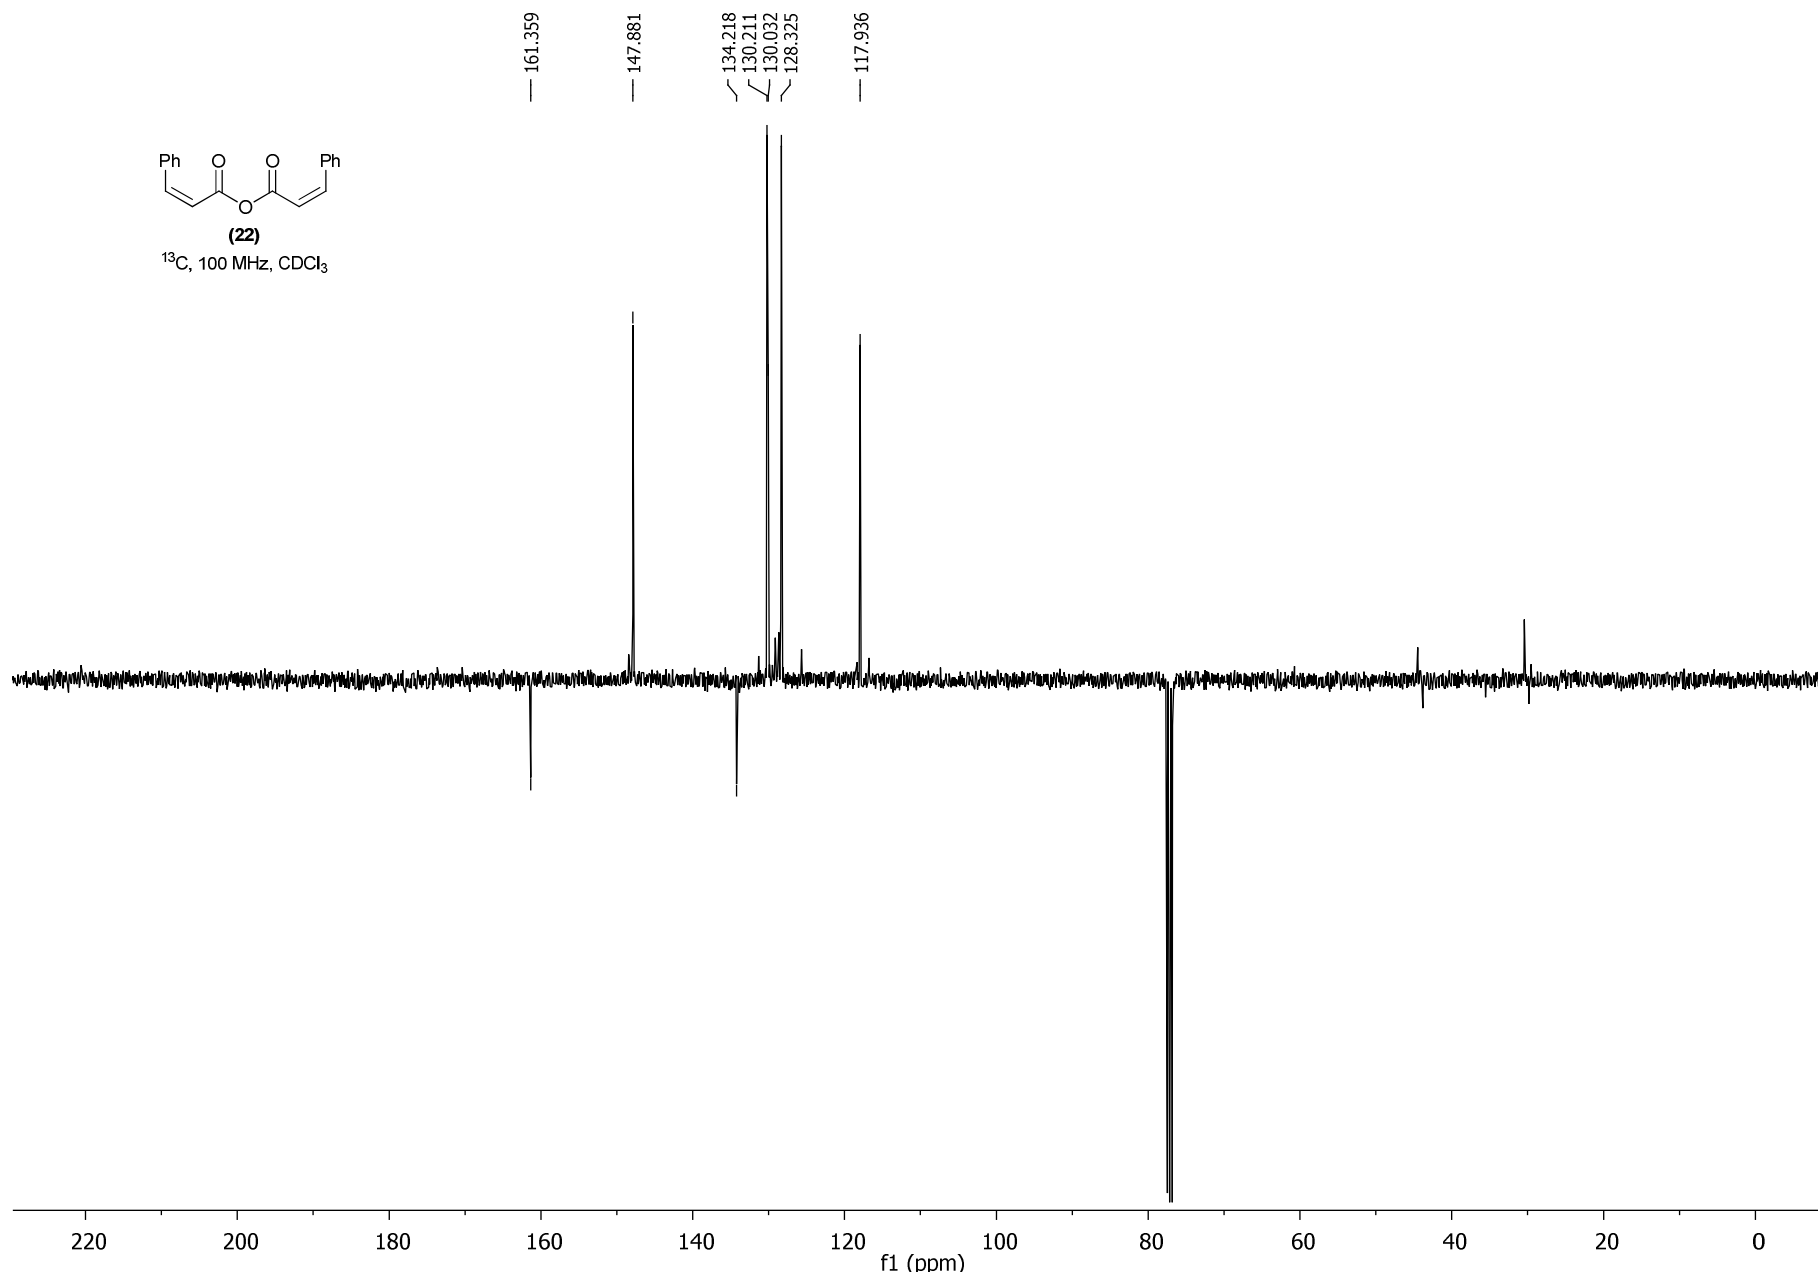

Supporting Information

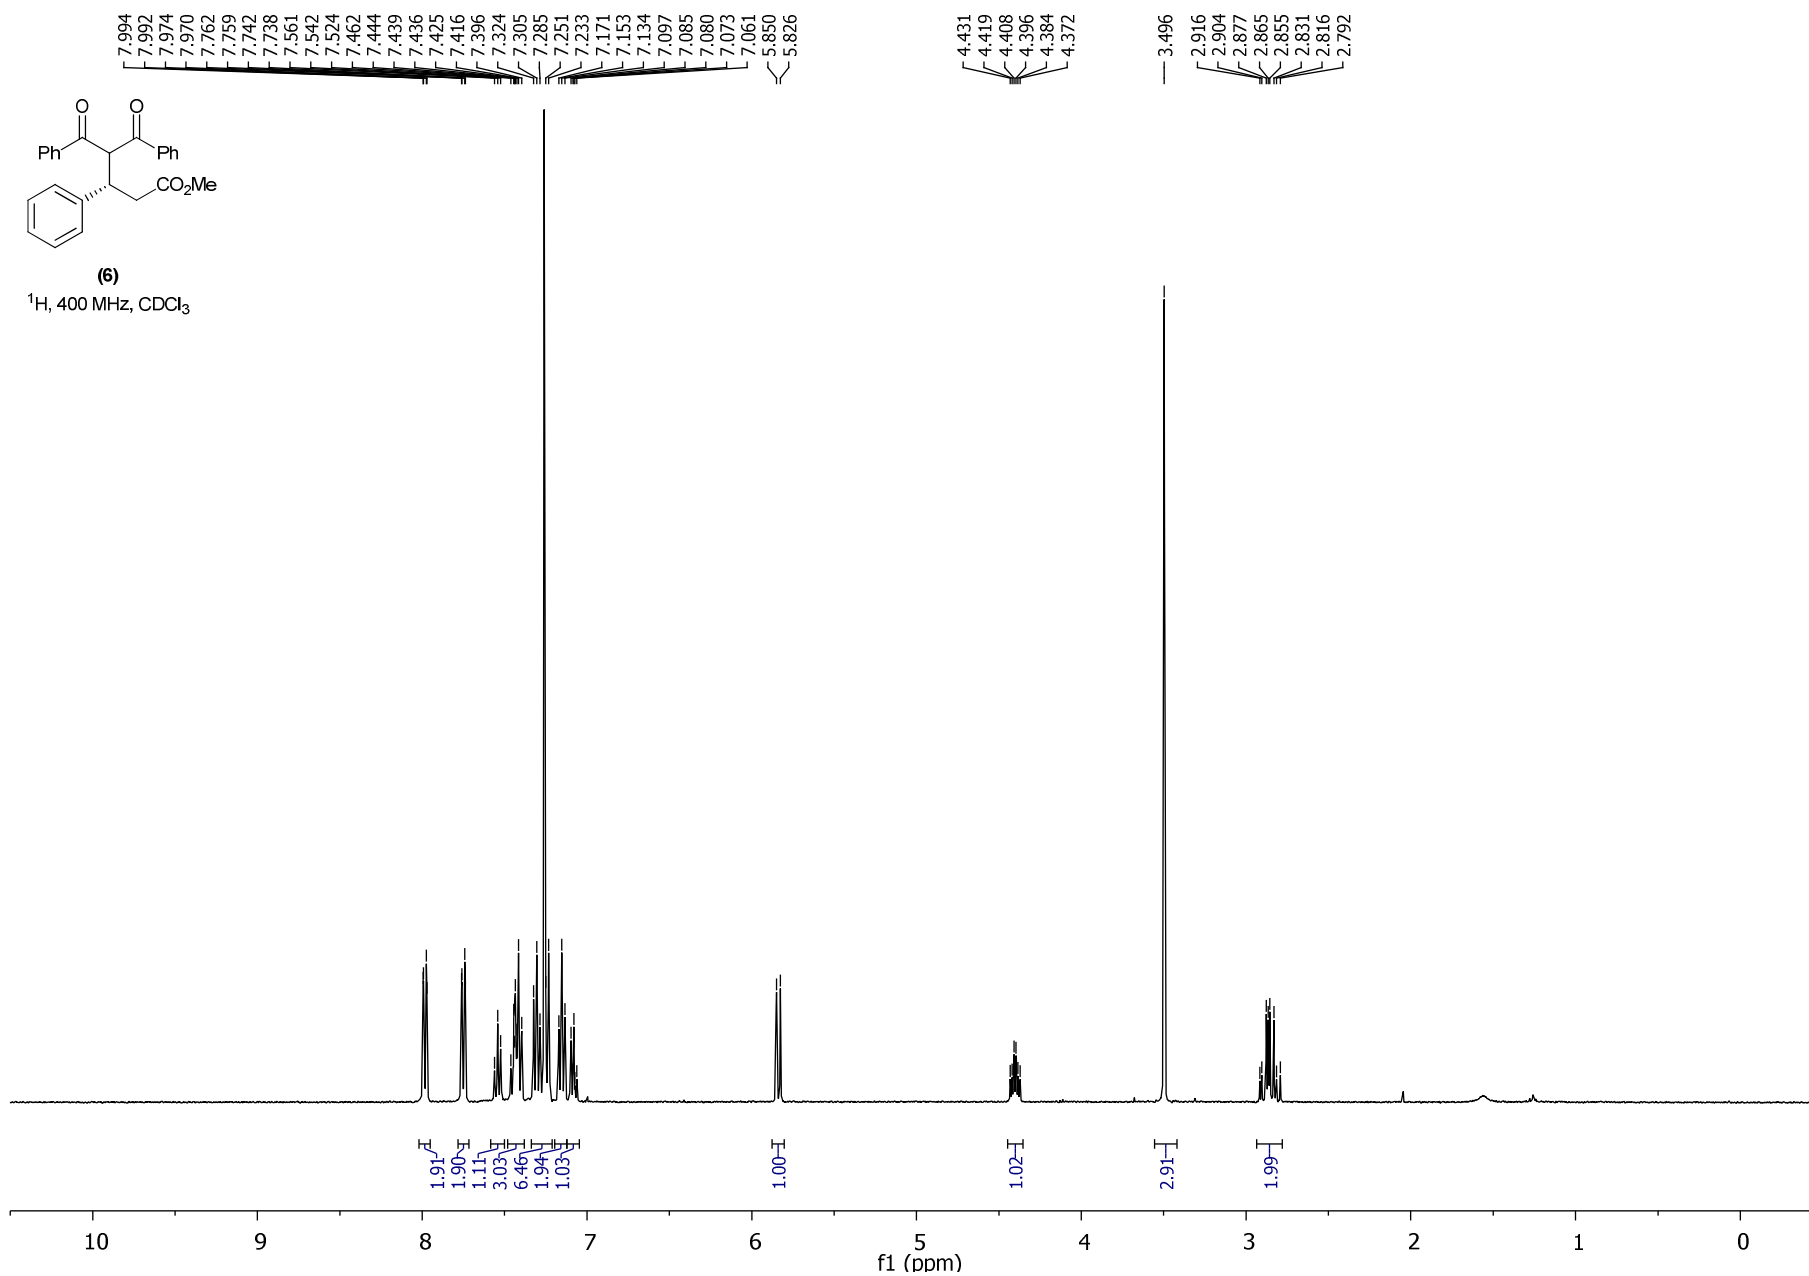

Supporting Information

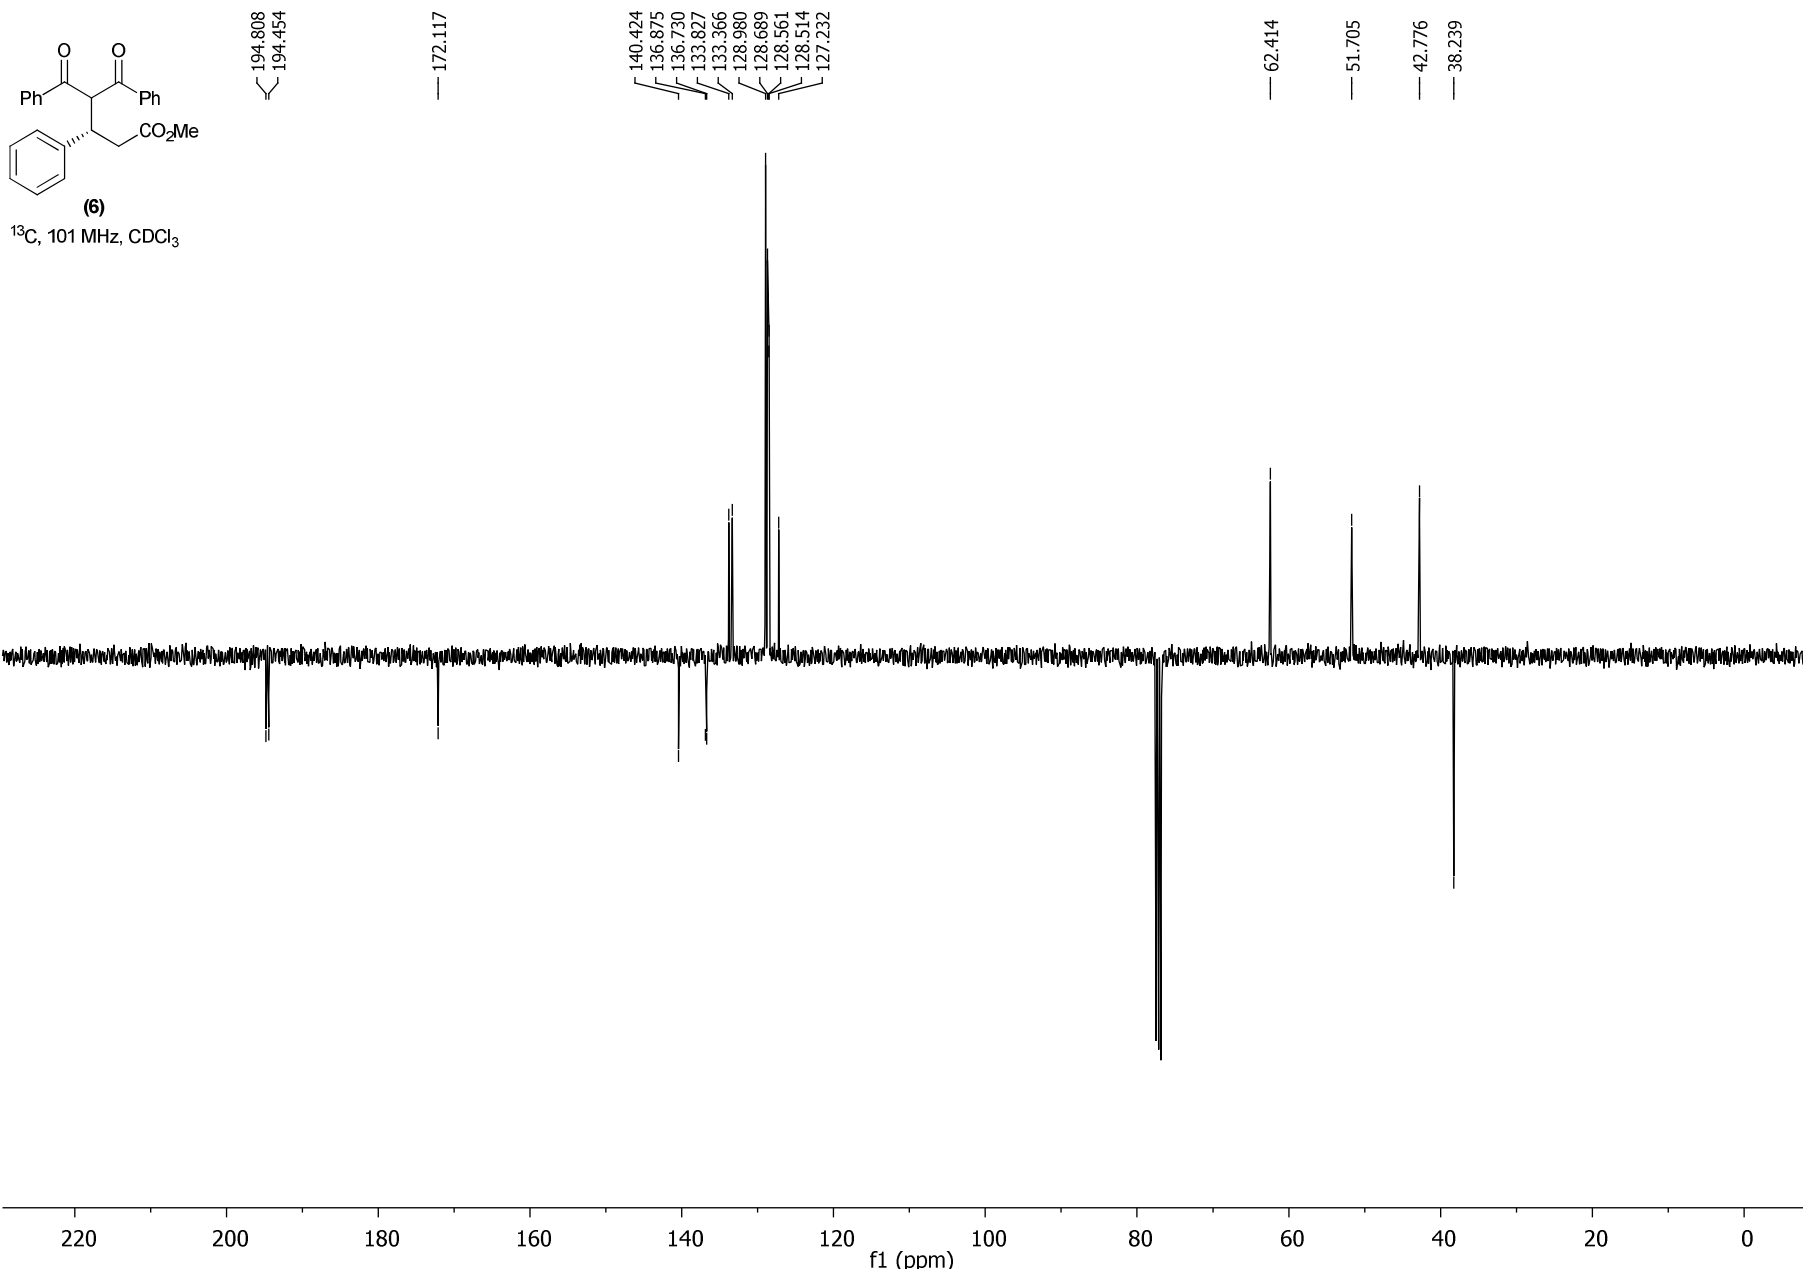

Supporting Information

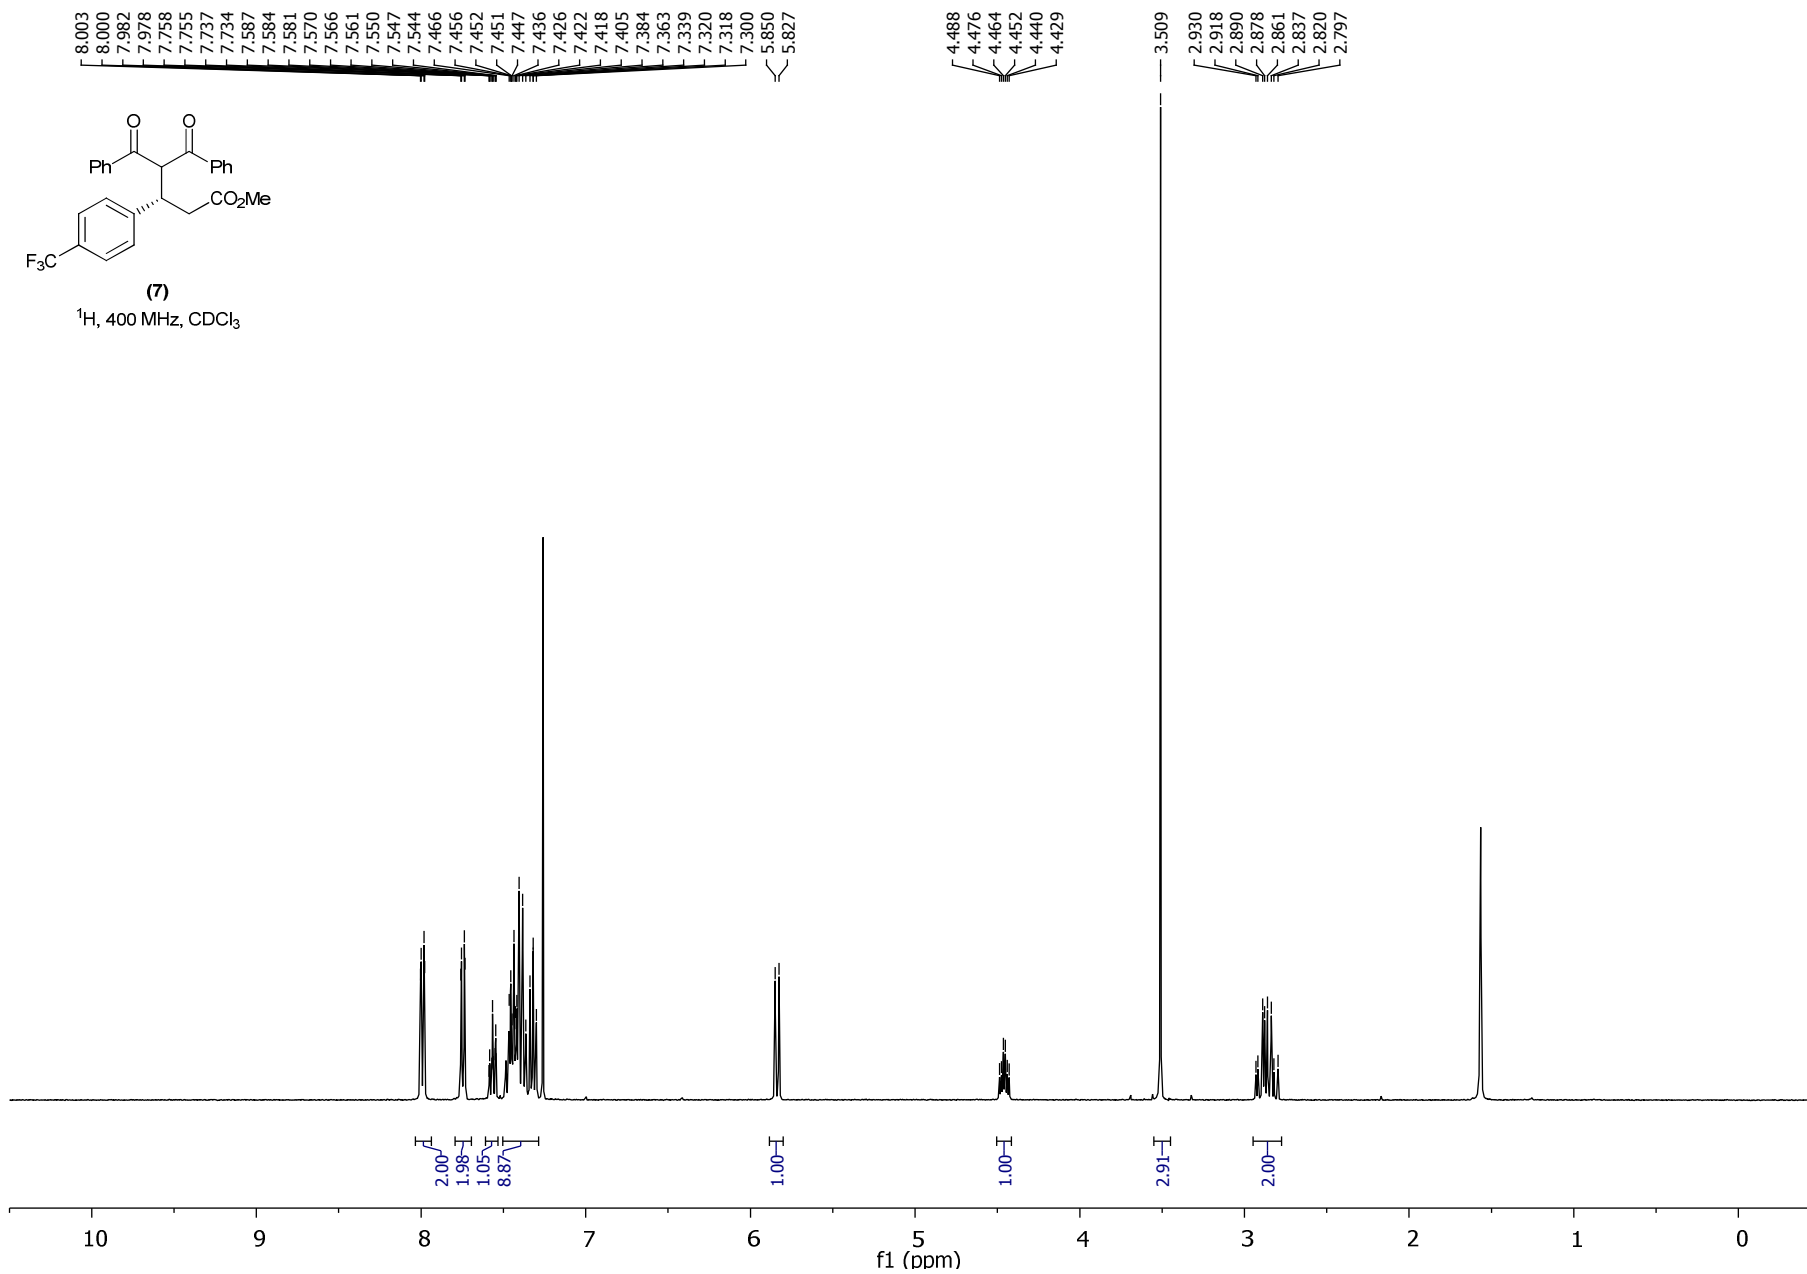

Supporting Information

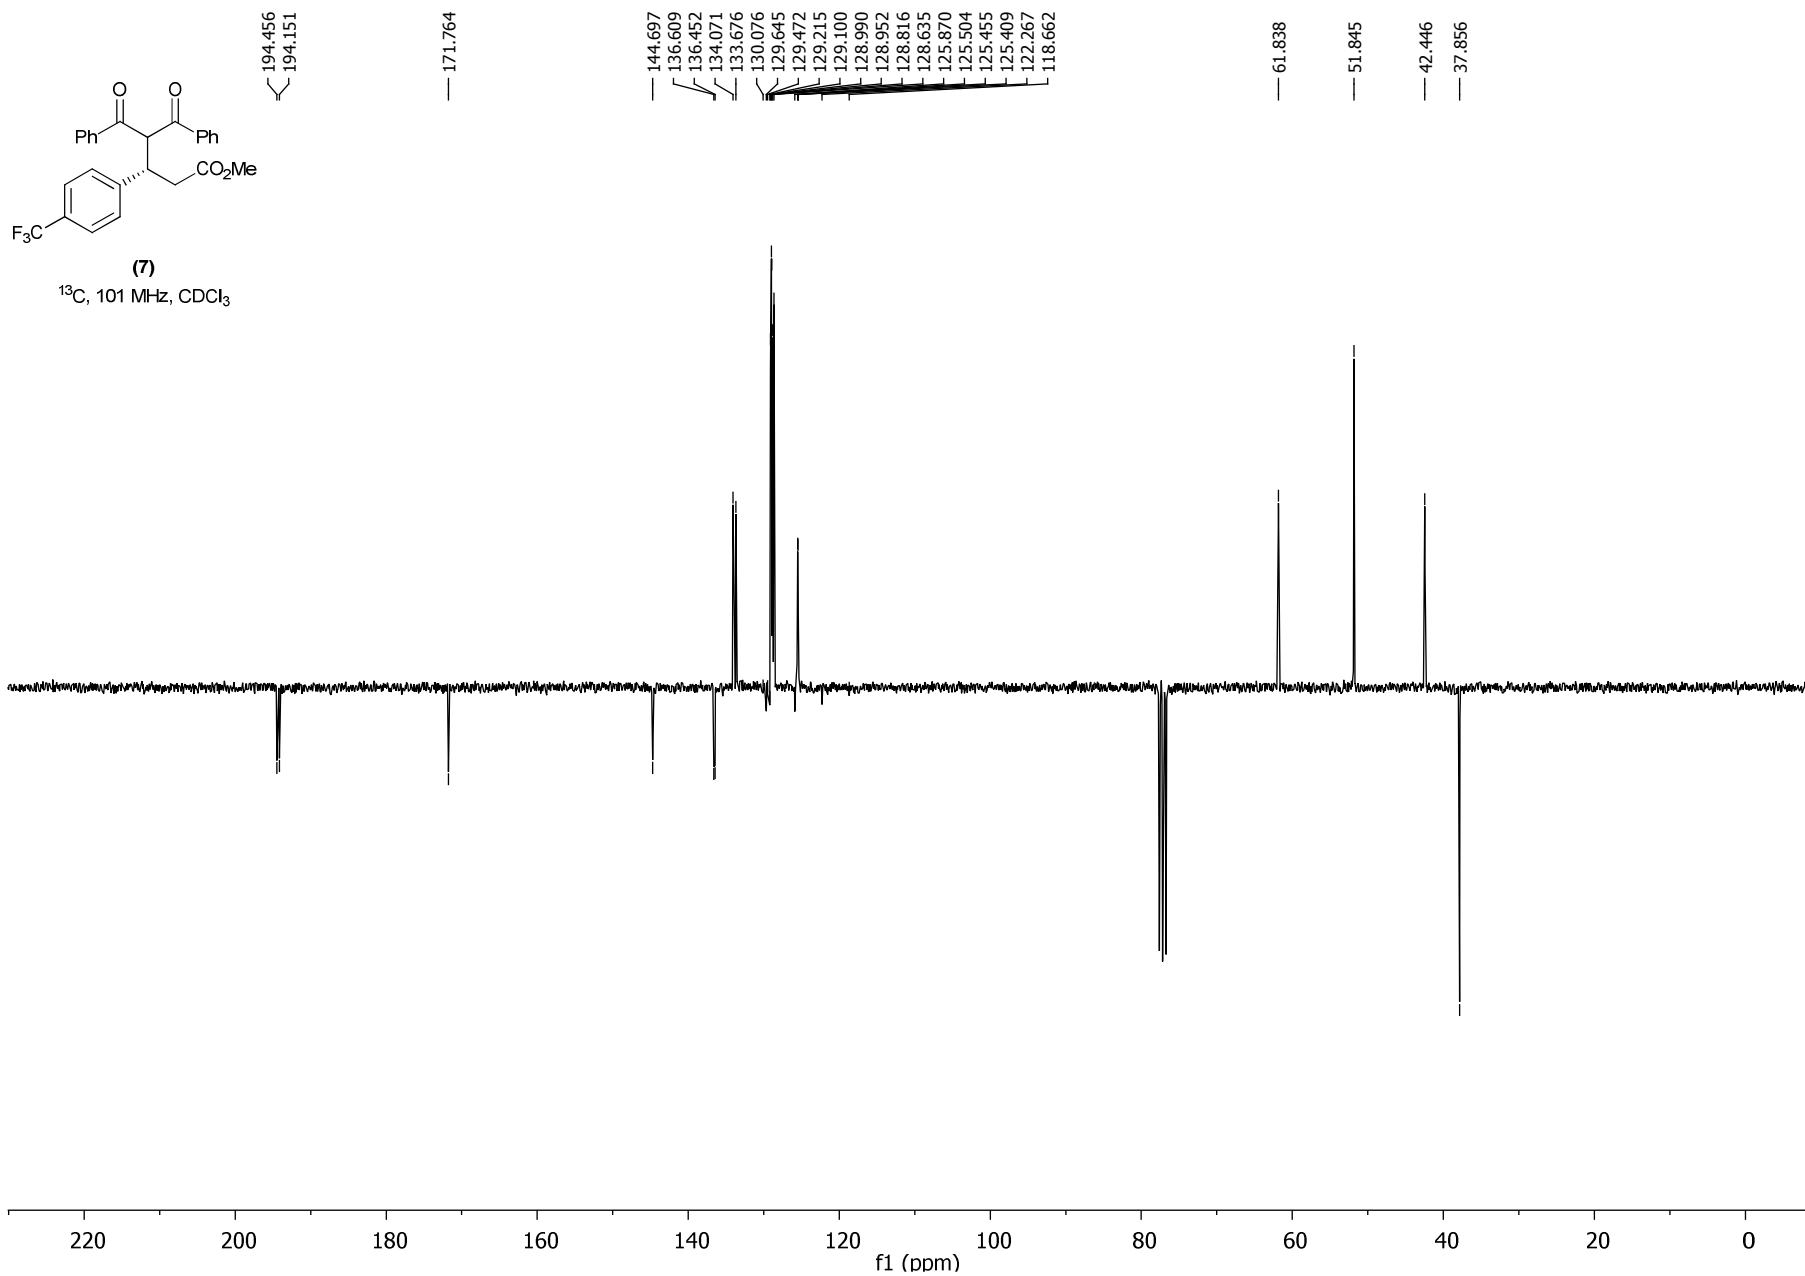

Supporting Information

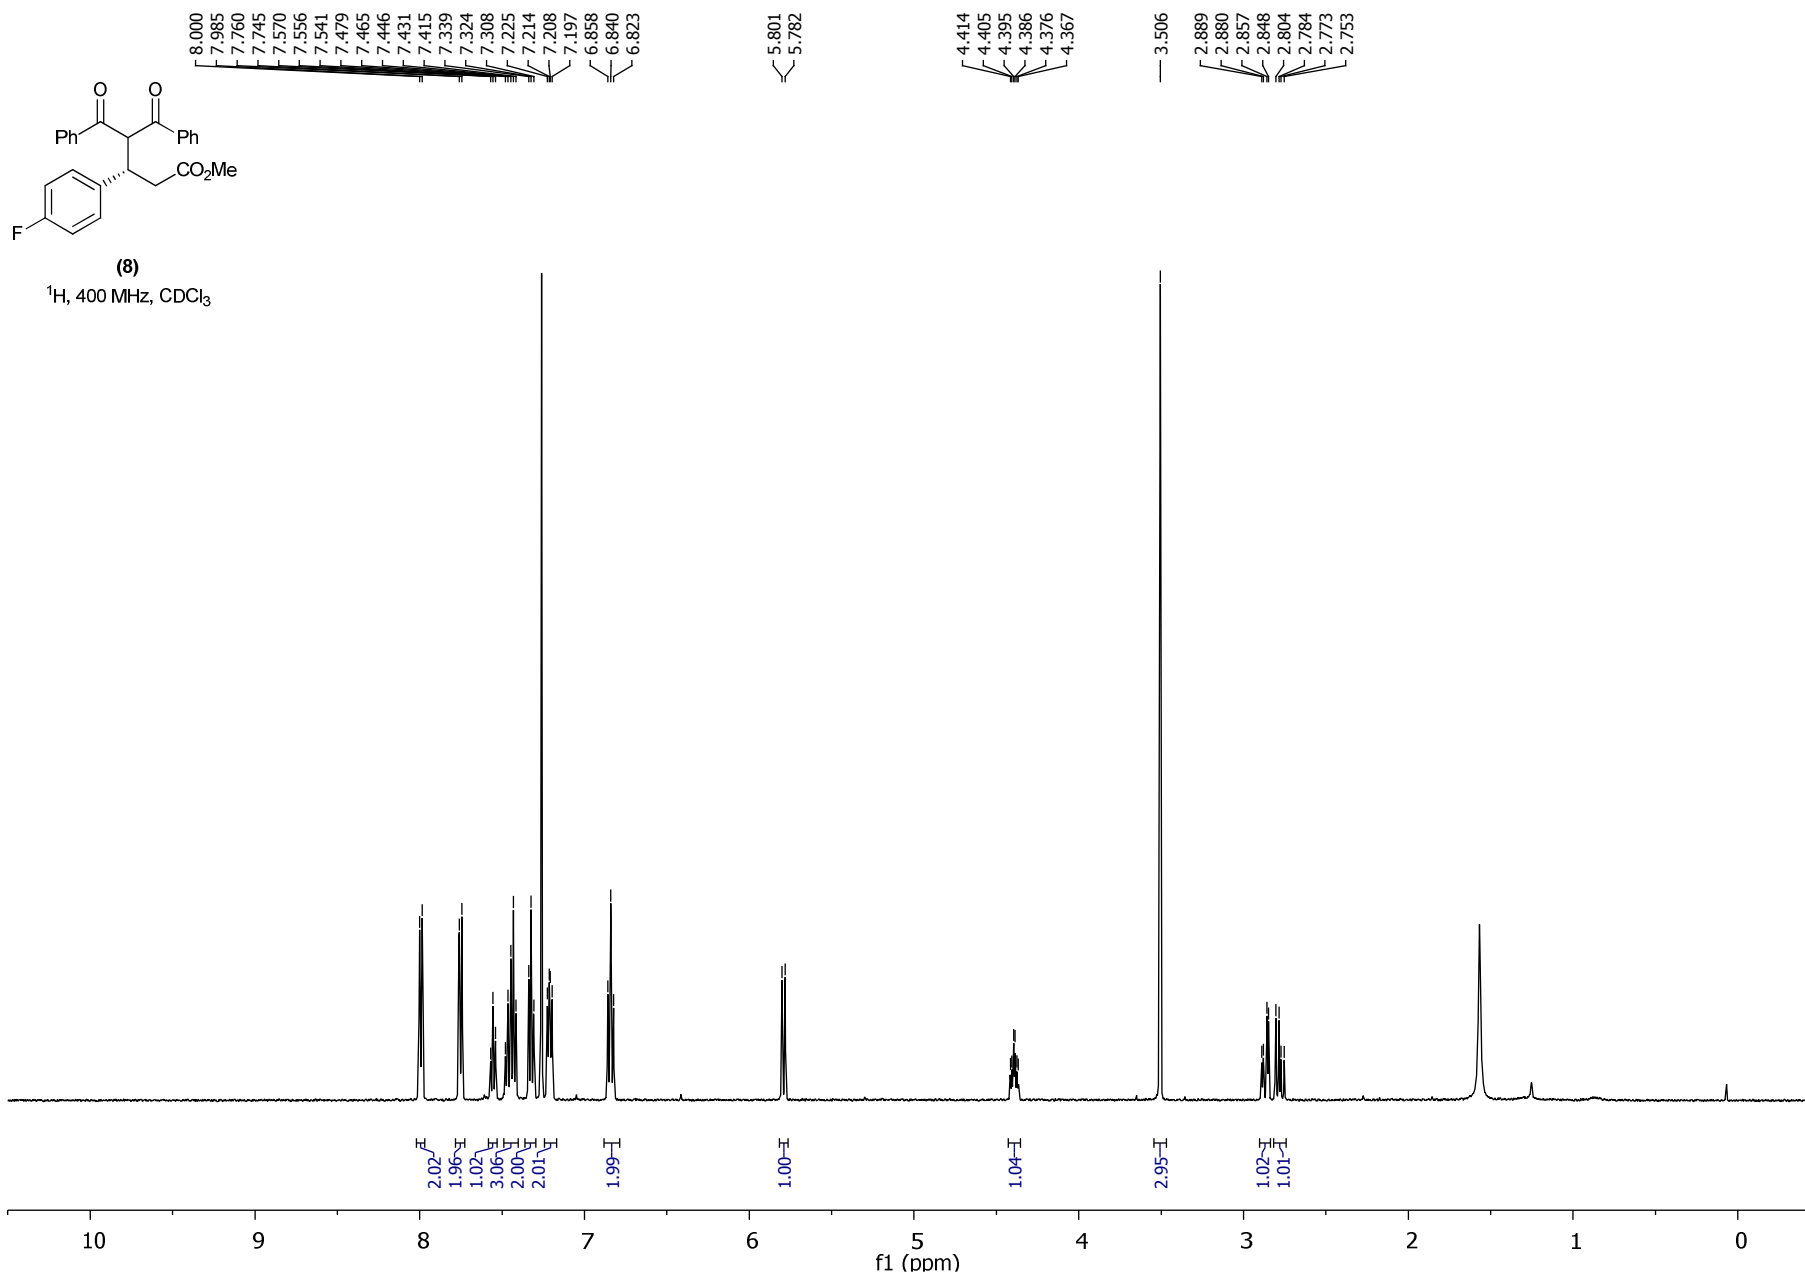

Supporting Information

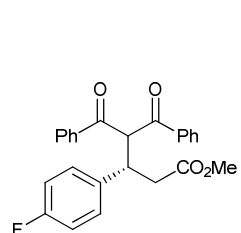

(8)

<sup>13</sup>C, 100 MHz, CDCl<sub>3</sub>

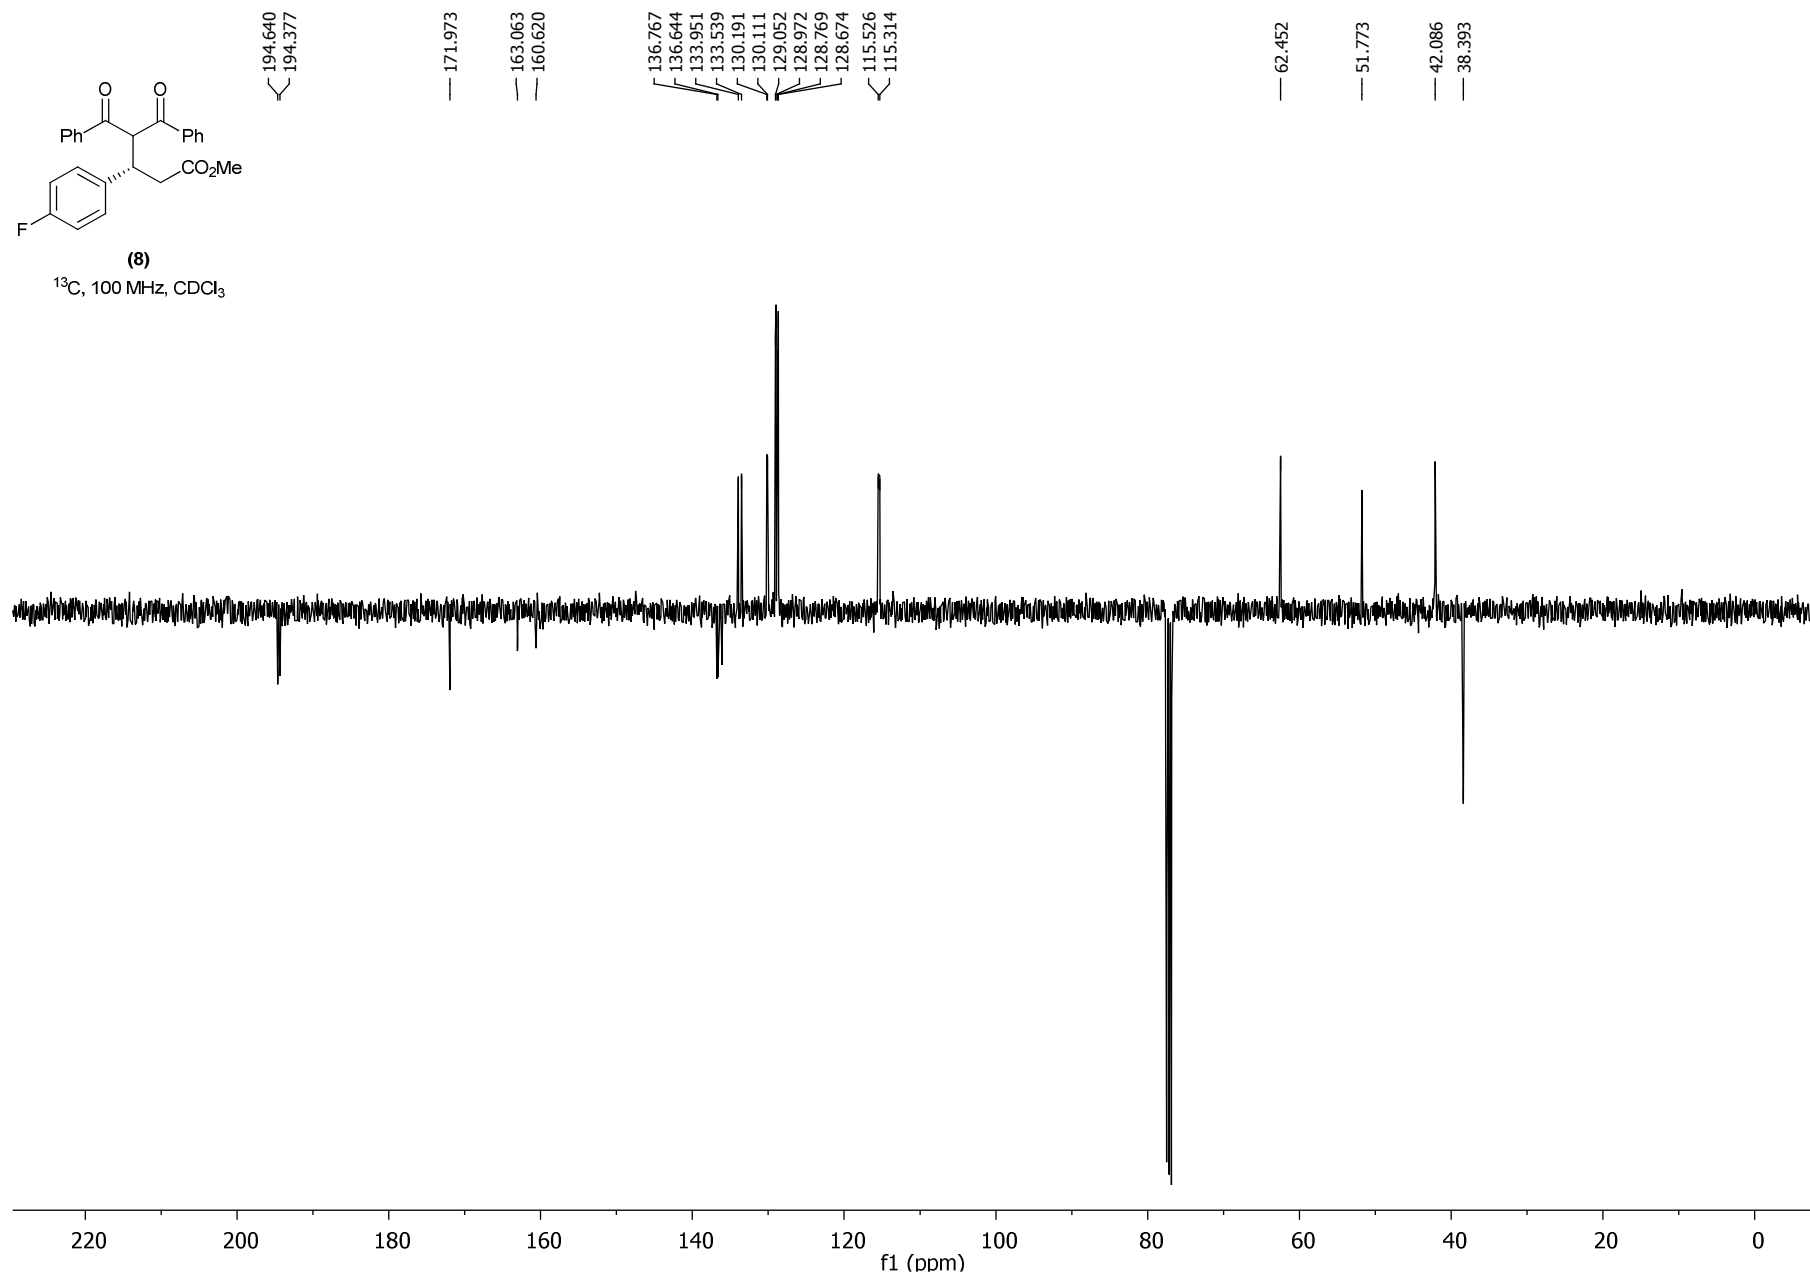



Supporting Information

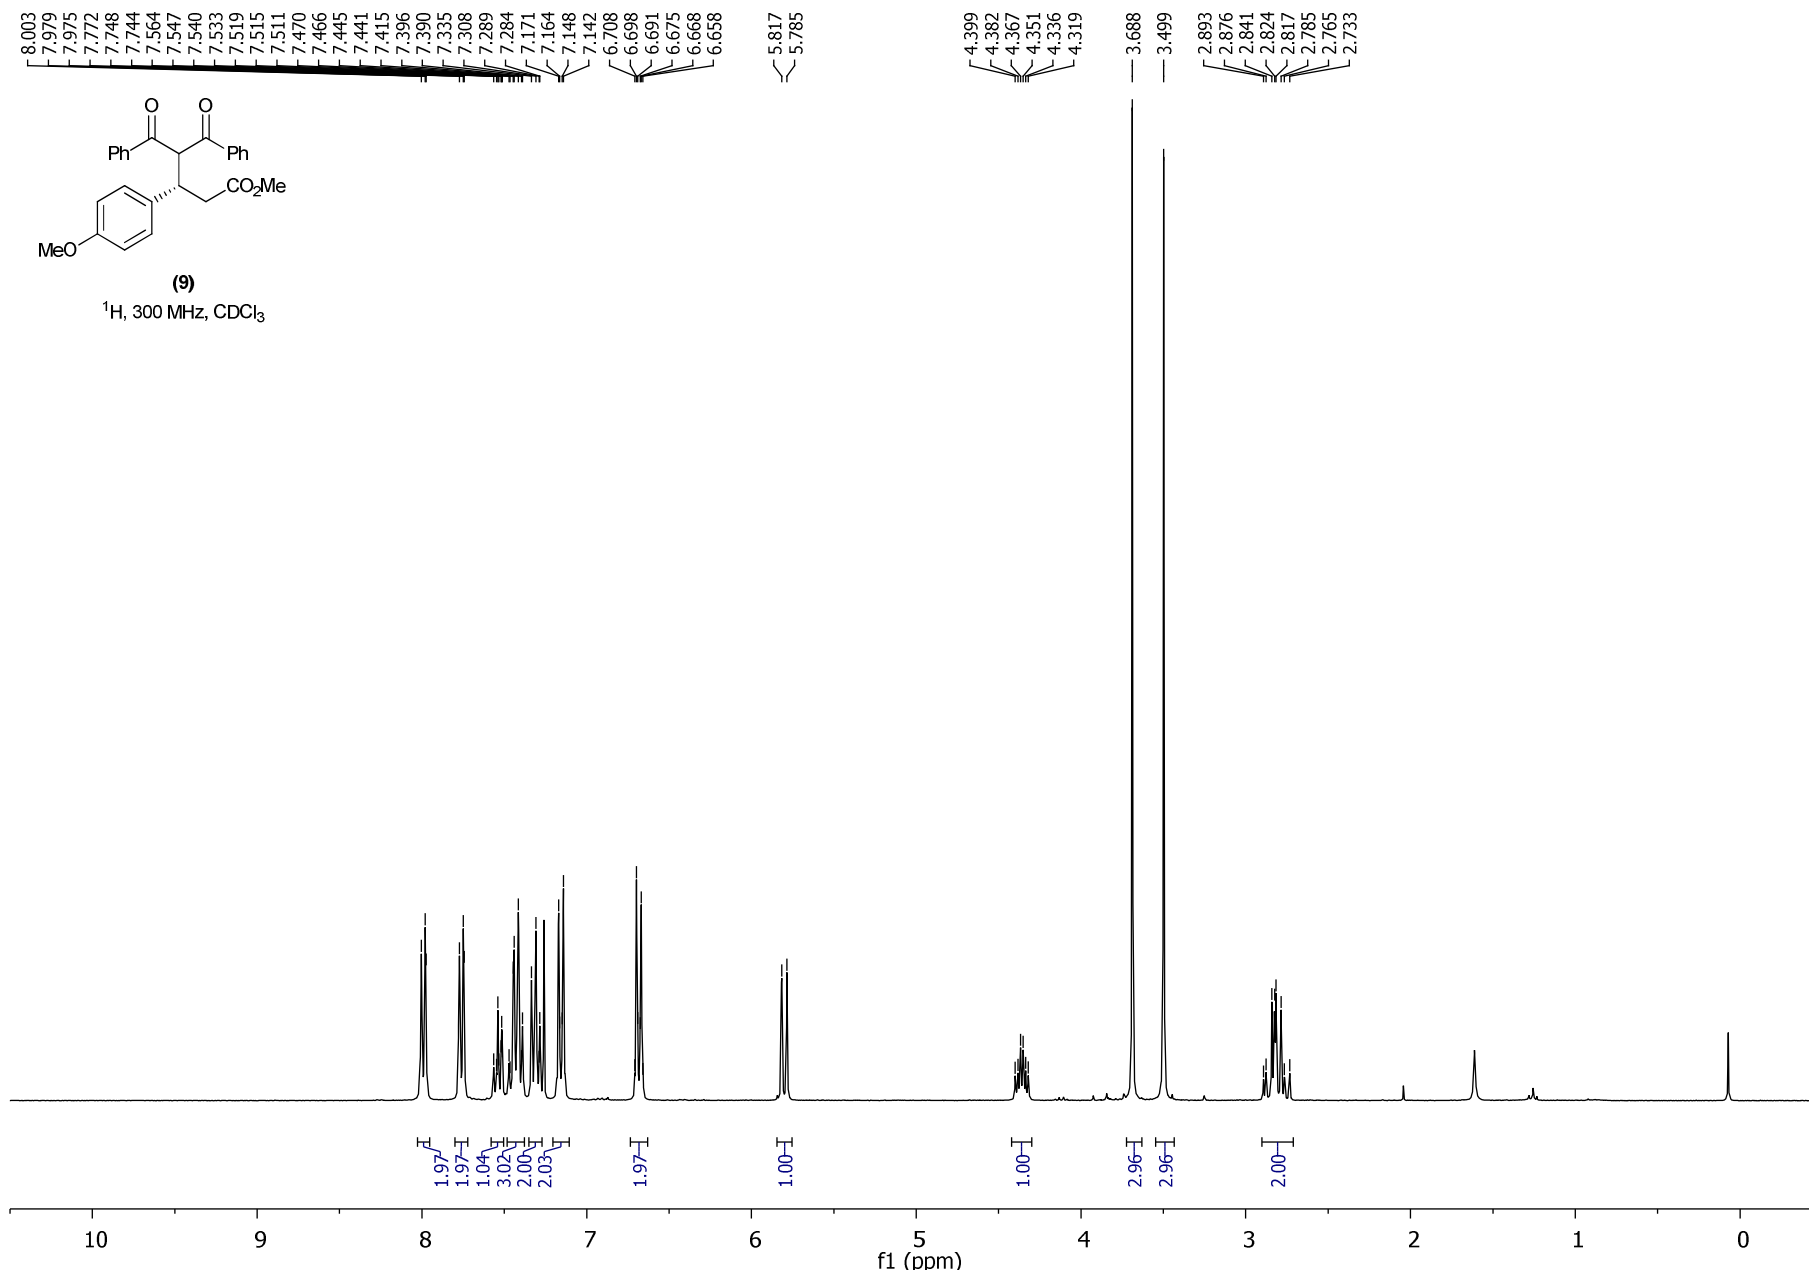

Supporting Information

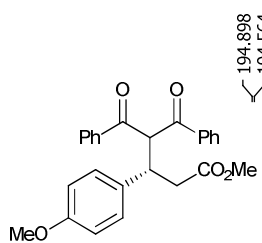

(9)

<sup>13</sup>C, 75 MHz, CDCl<sub>3</sub>

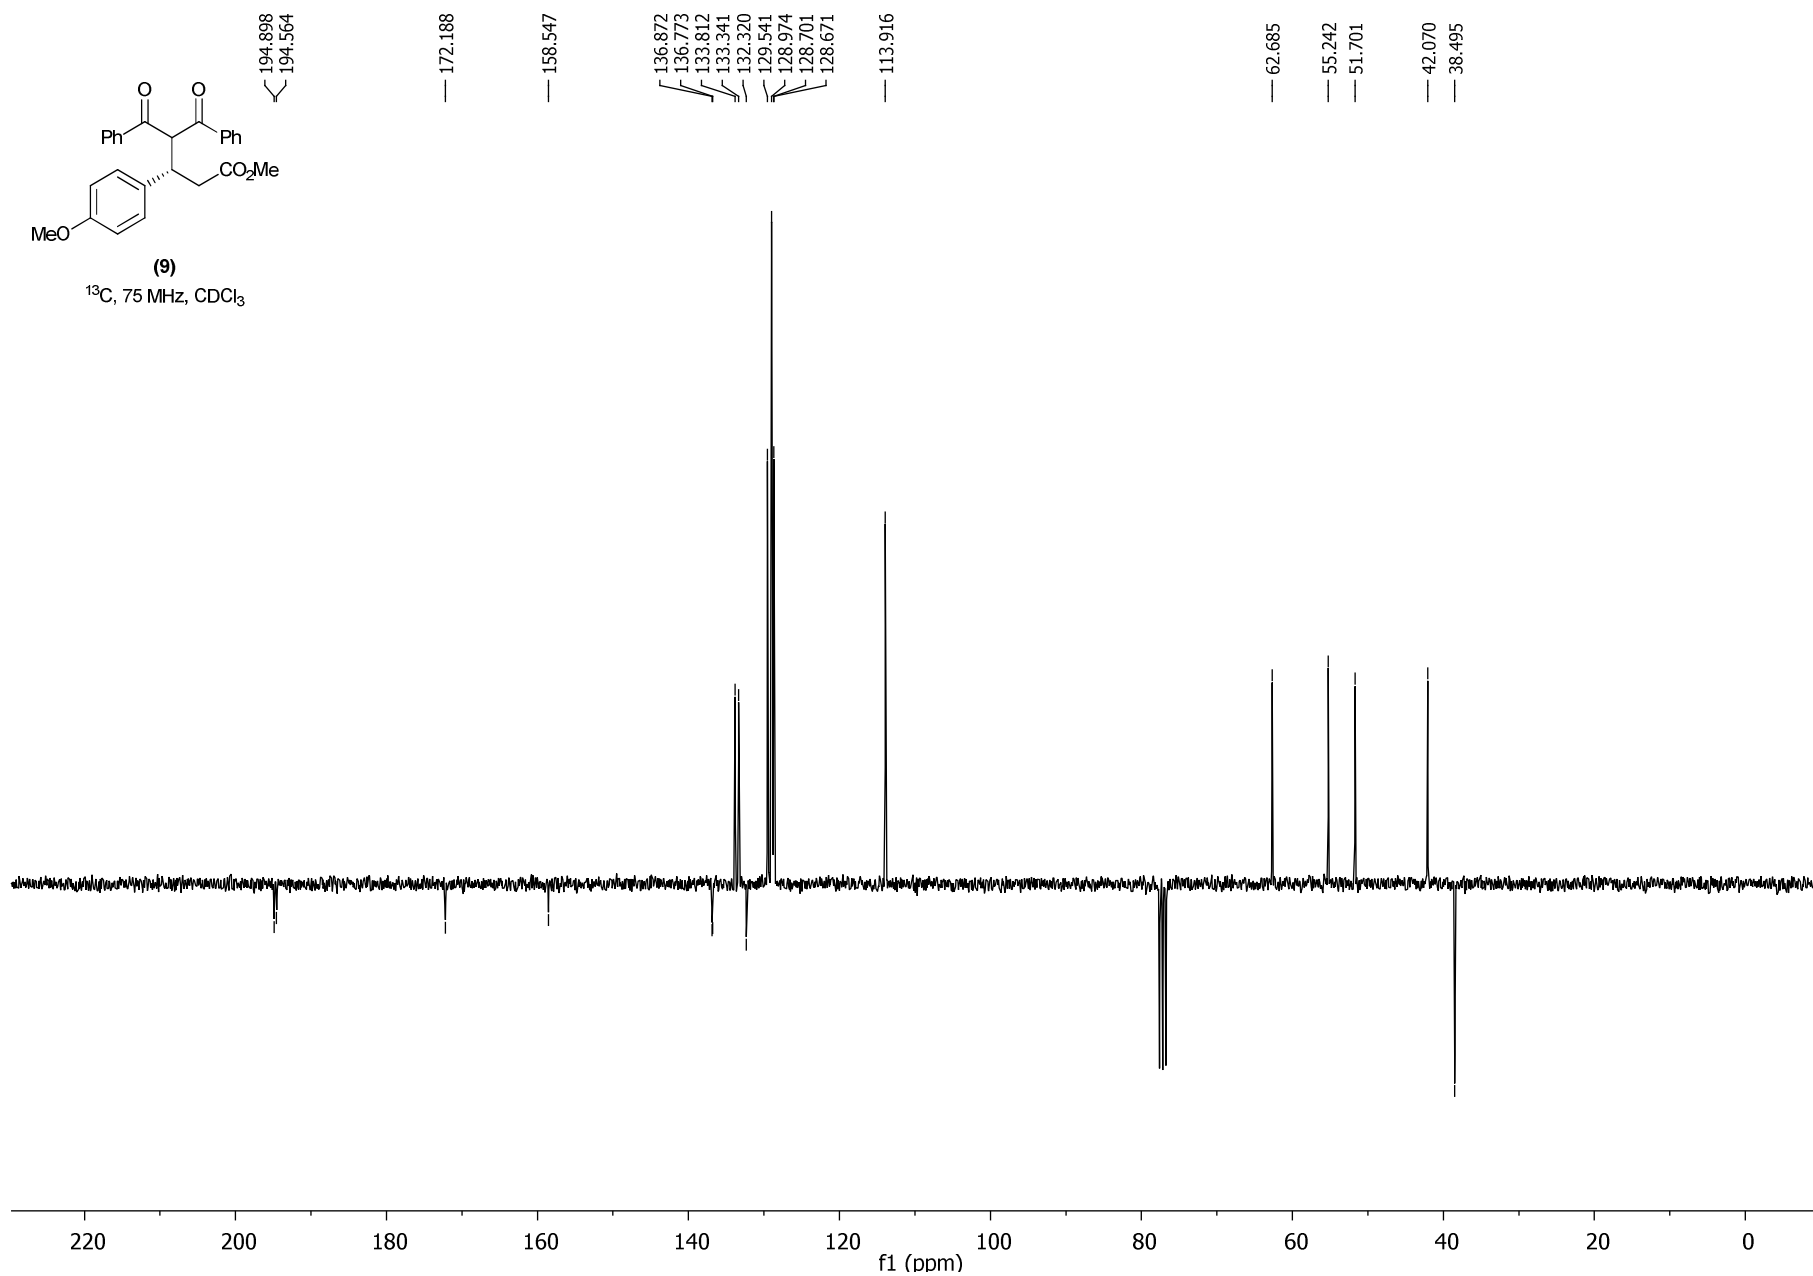

Supporting Information

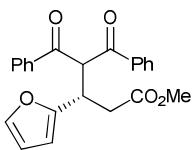

(10)

$^1\text{H}$ , 400 MHz,  $\text{CDCl}_3$

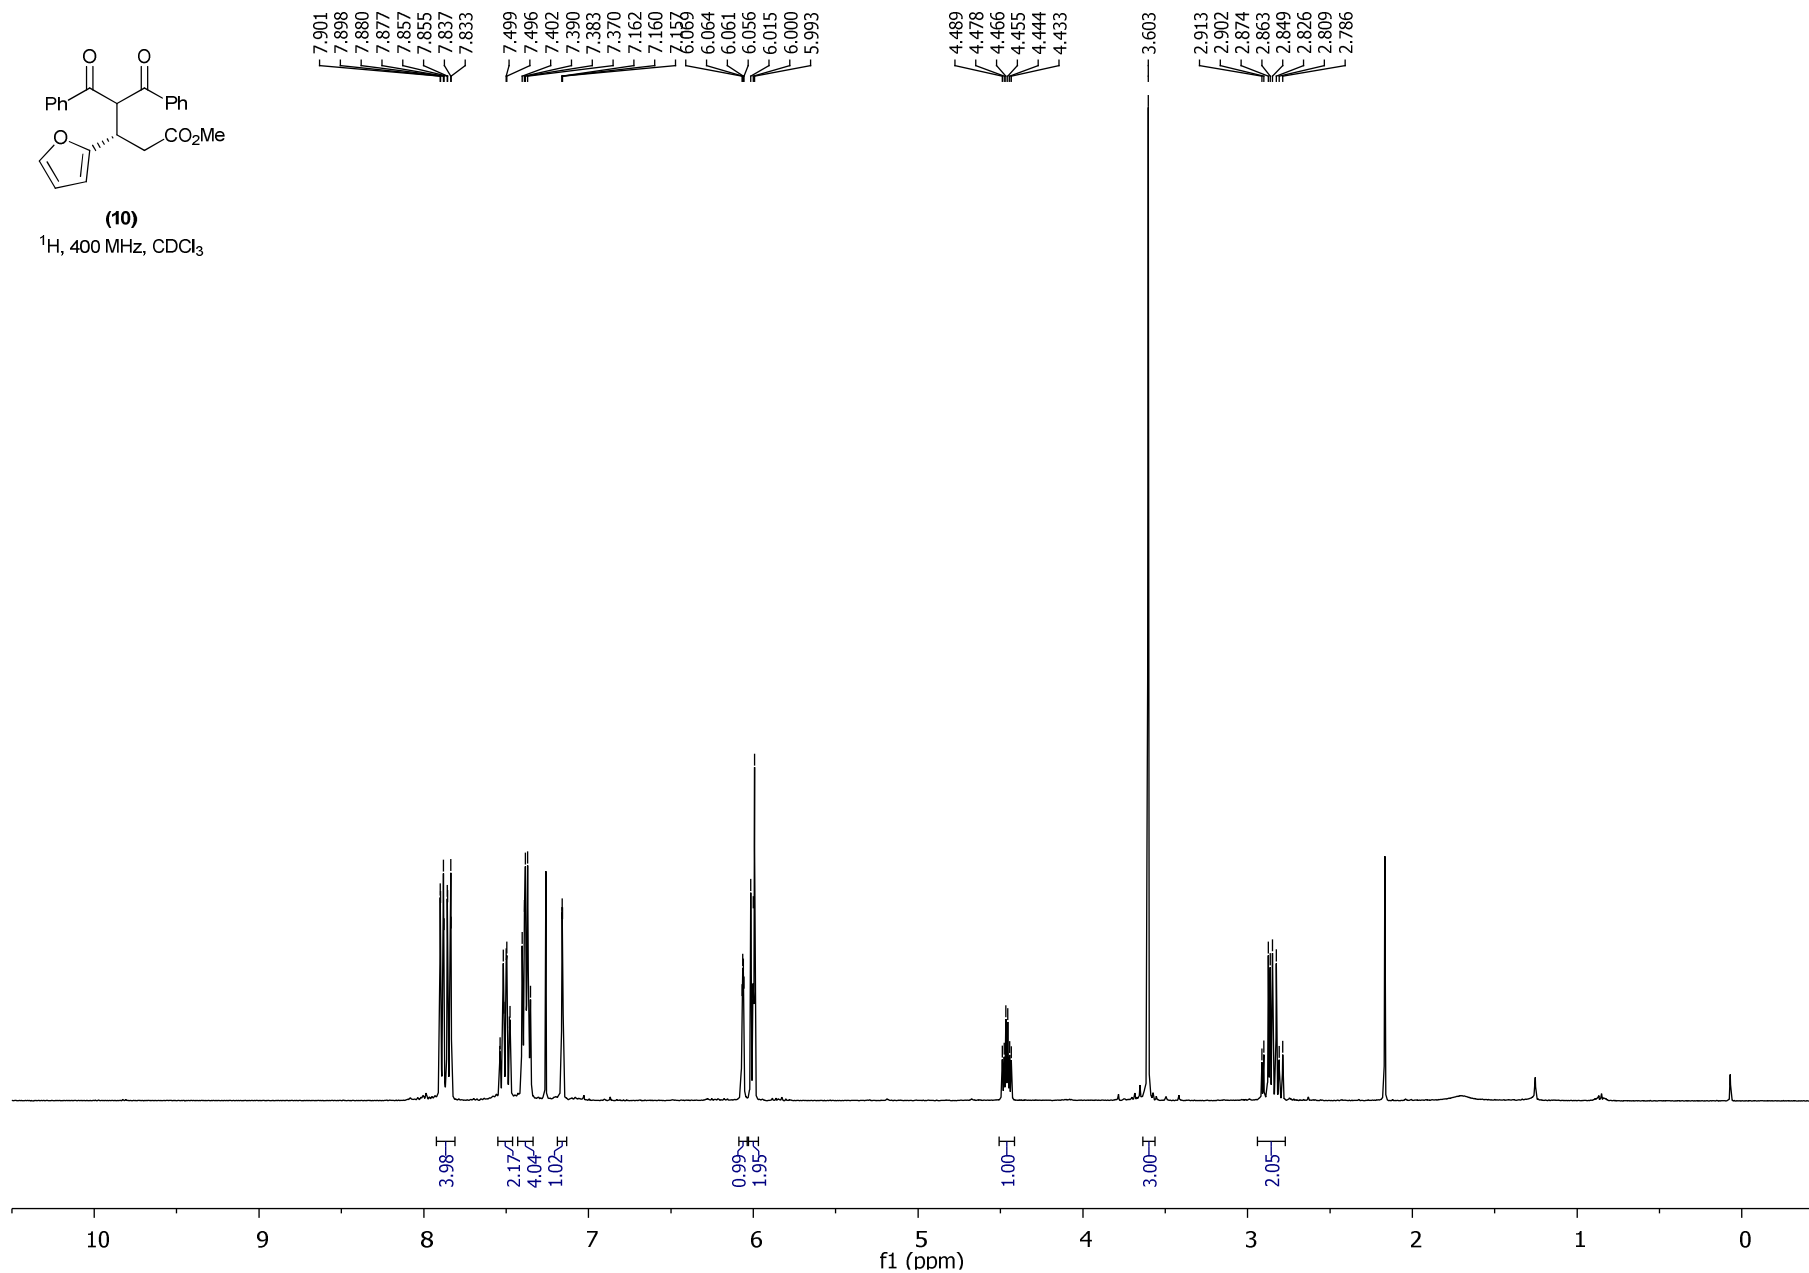

Supporting Information

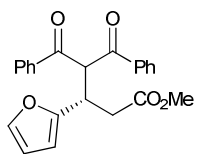

(10)

<sup>13</sup>C, 101 MHz, CDCl<sub>3</sub>

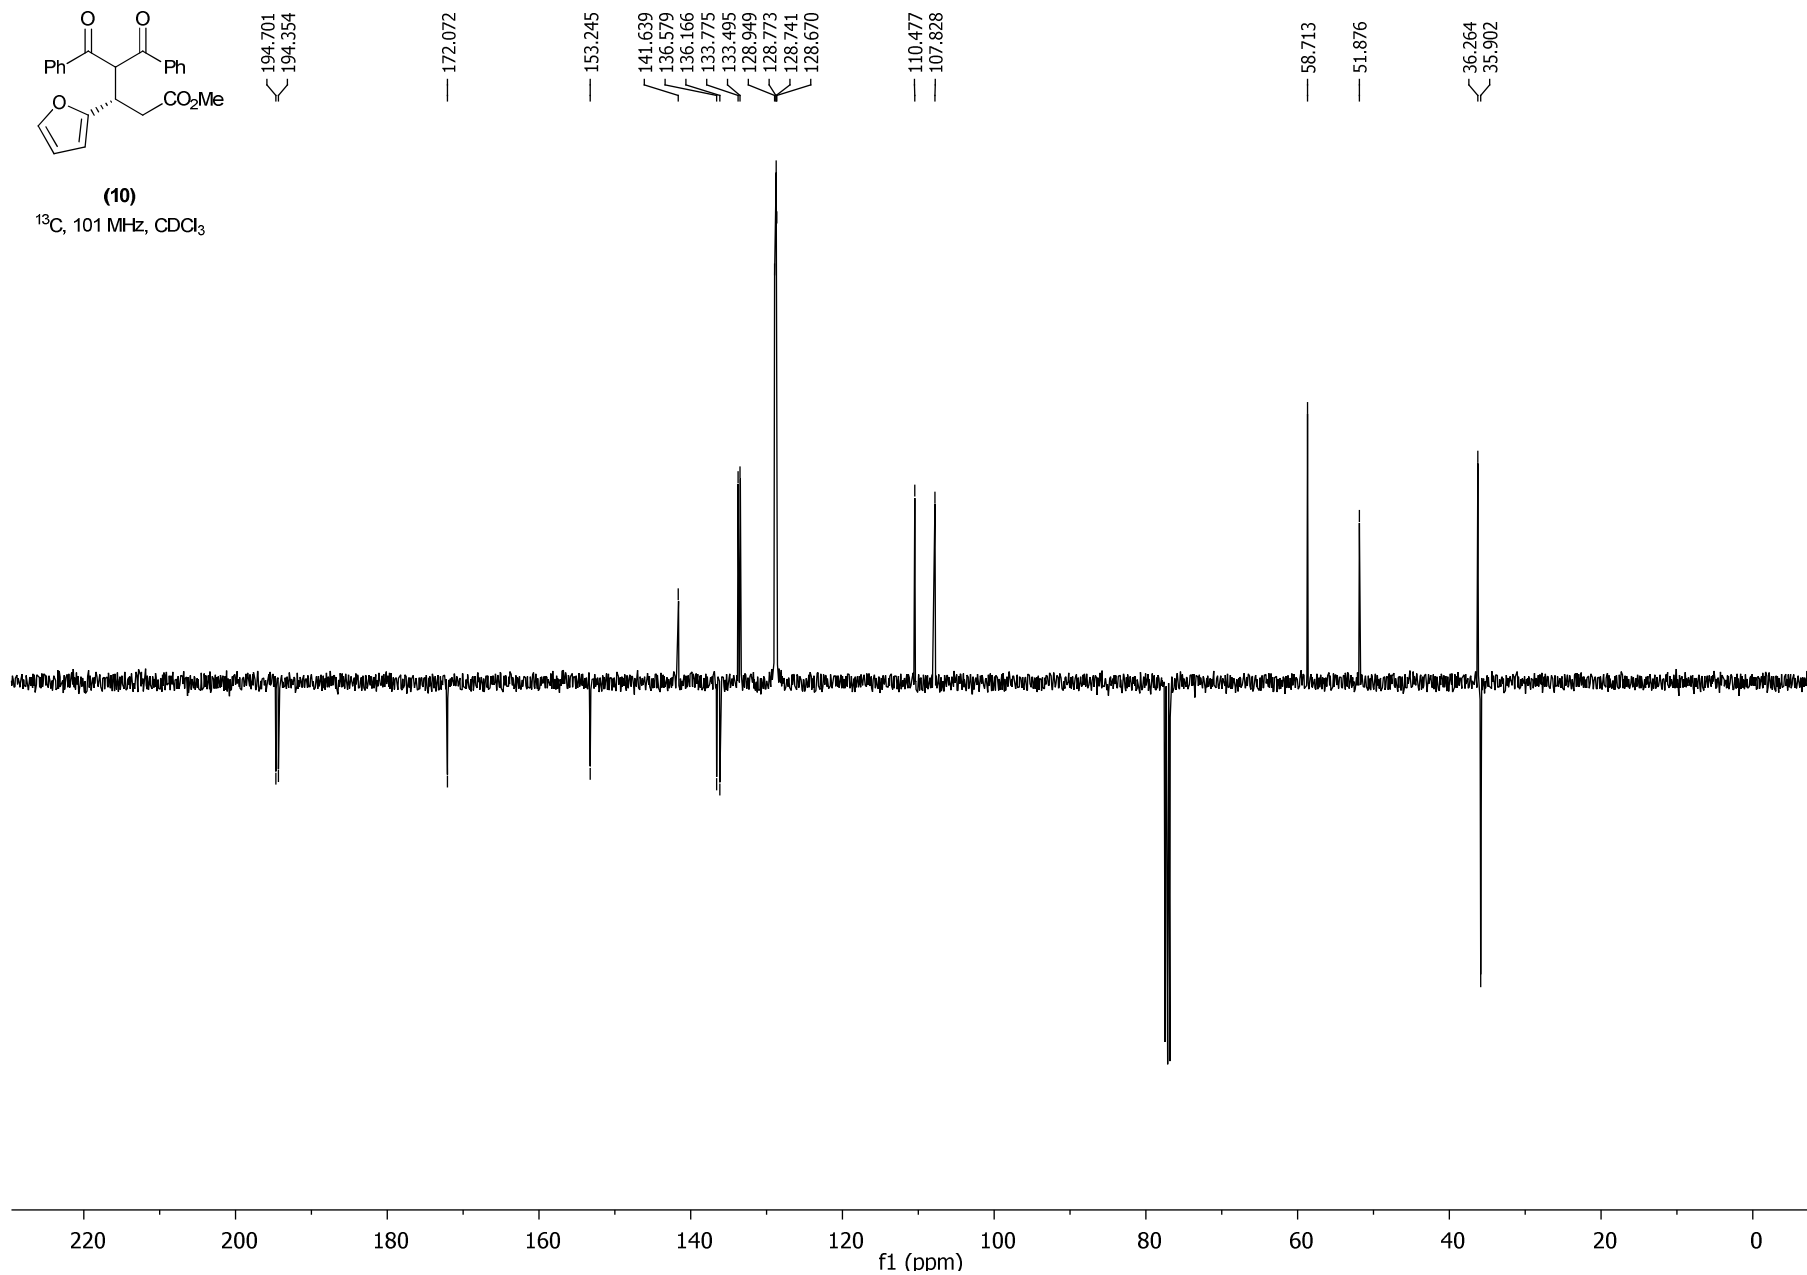

Supporting Information

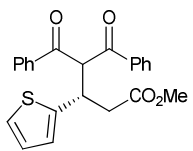

(11)

<sup>1</sup>H, 400 MHz, CDCl<sub>3</sub>

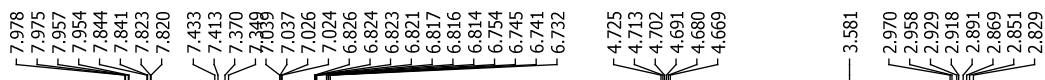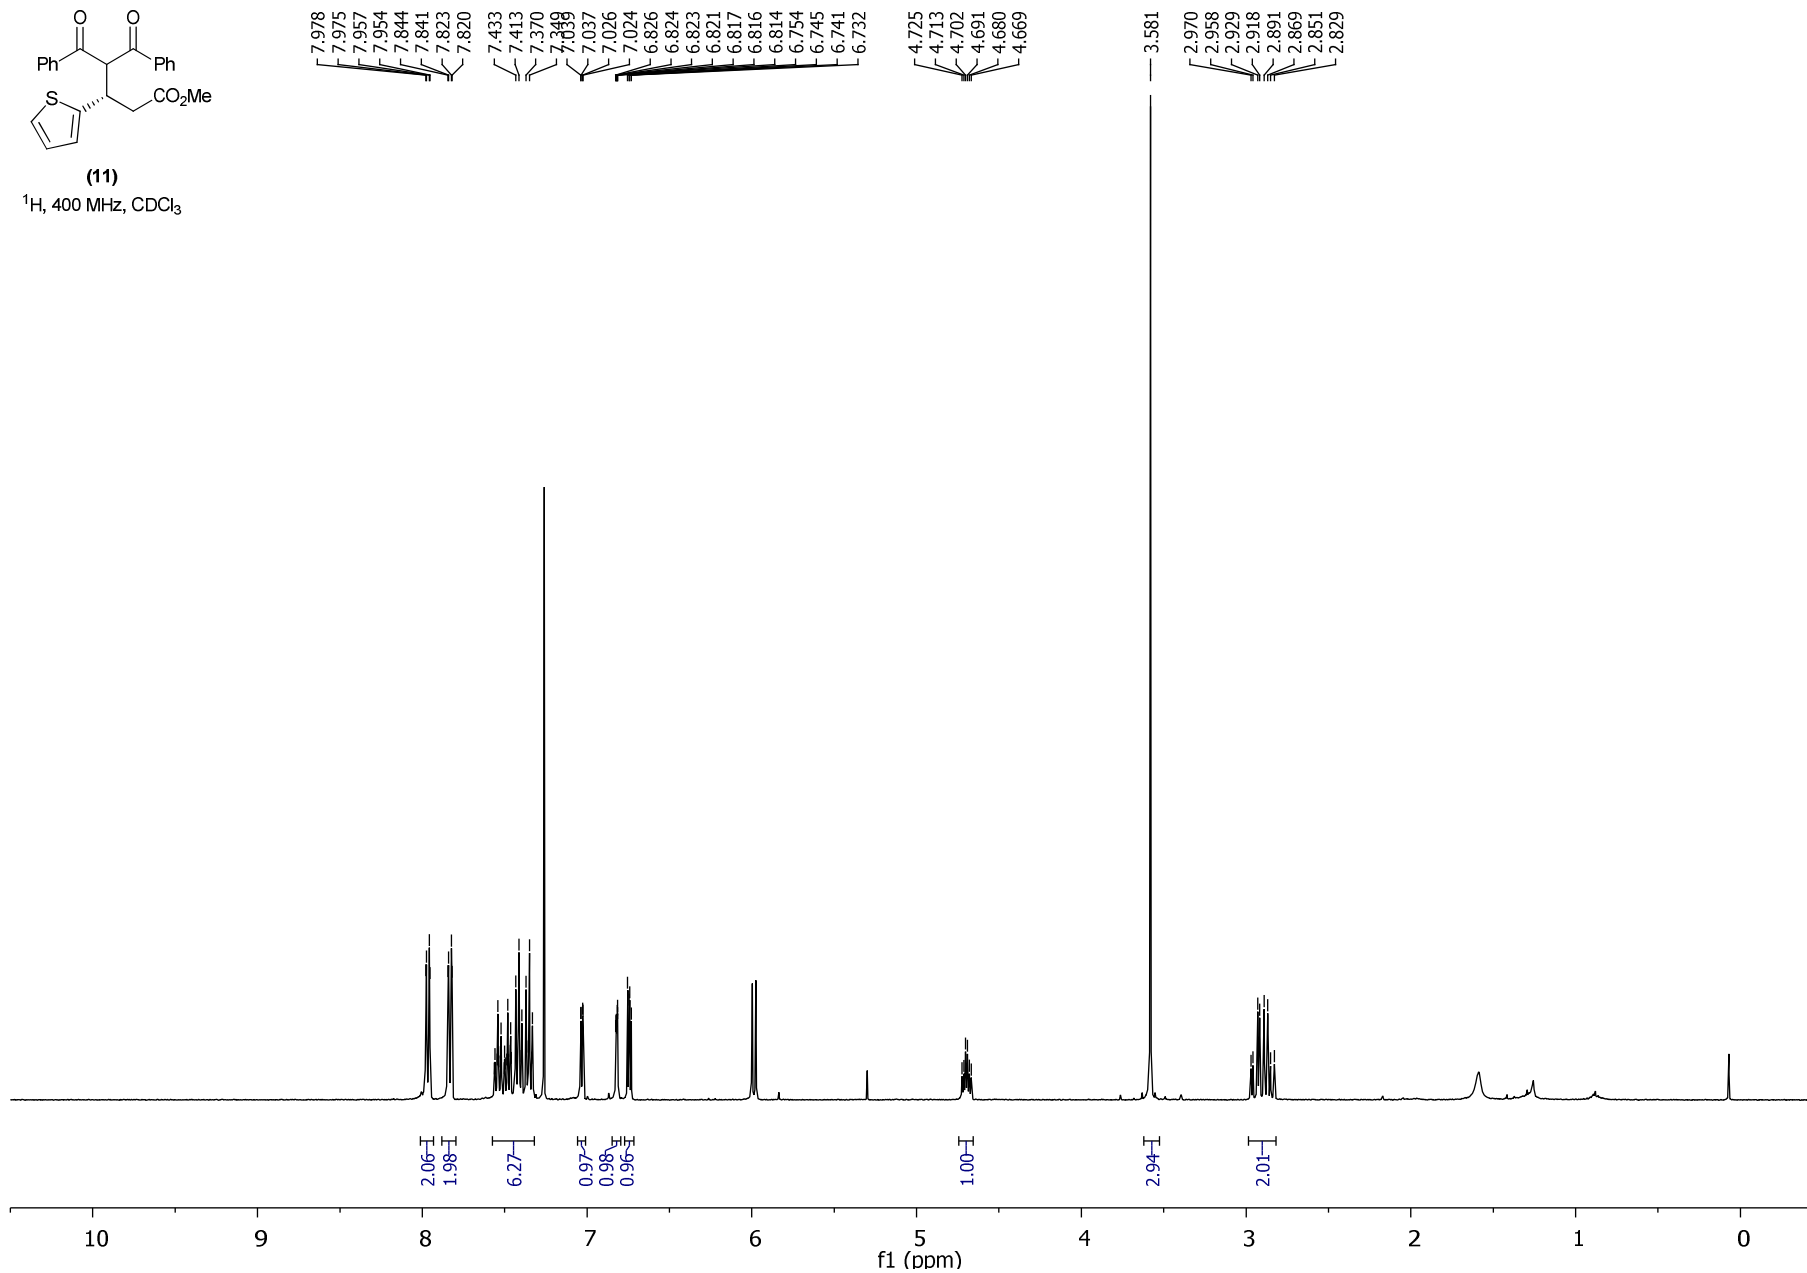

Supporting Information

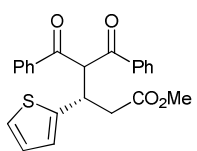

(11)

$^{13}\text{C}$ , 101 MHz,  $\text{CDCl}_3$

194.495  
194.378

172.074

143.494  
136.680  
136.581  
133.875  
133.518  
129.006  
128.938  
128.764  
126.748  
126.512  
124.368

61.989

51.895

39.028  
38.220

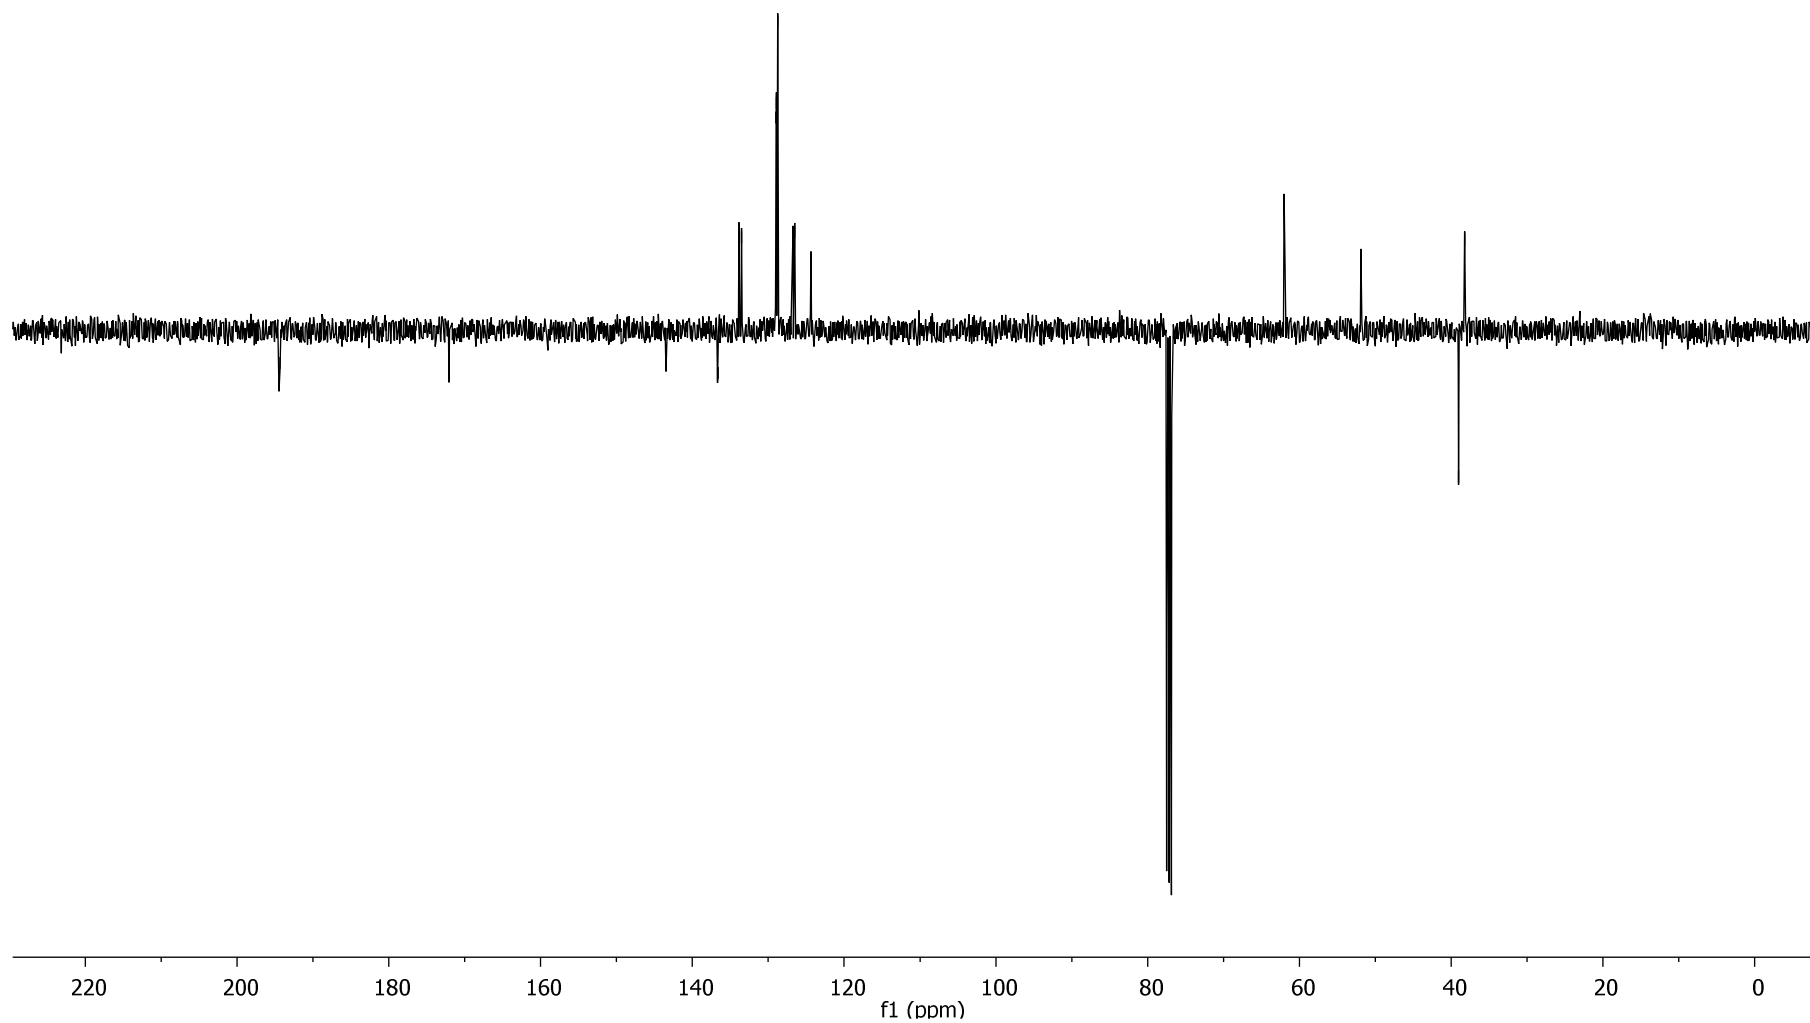

Supporting Information

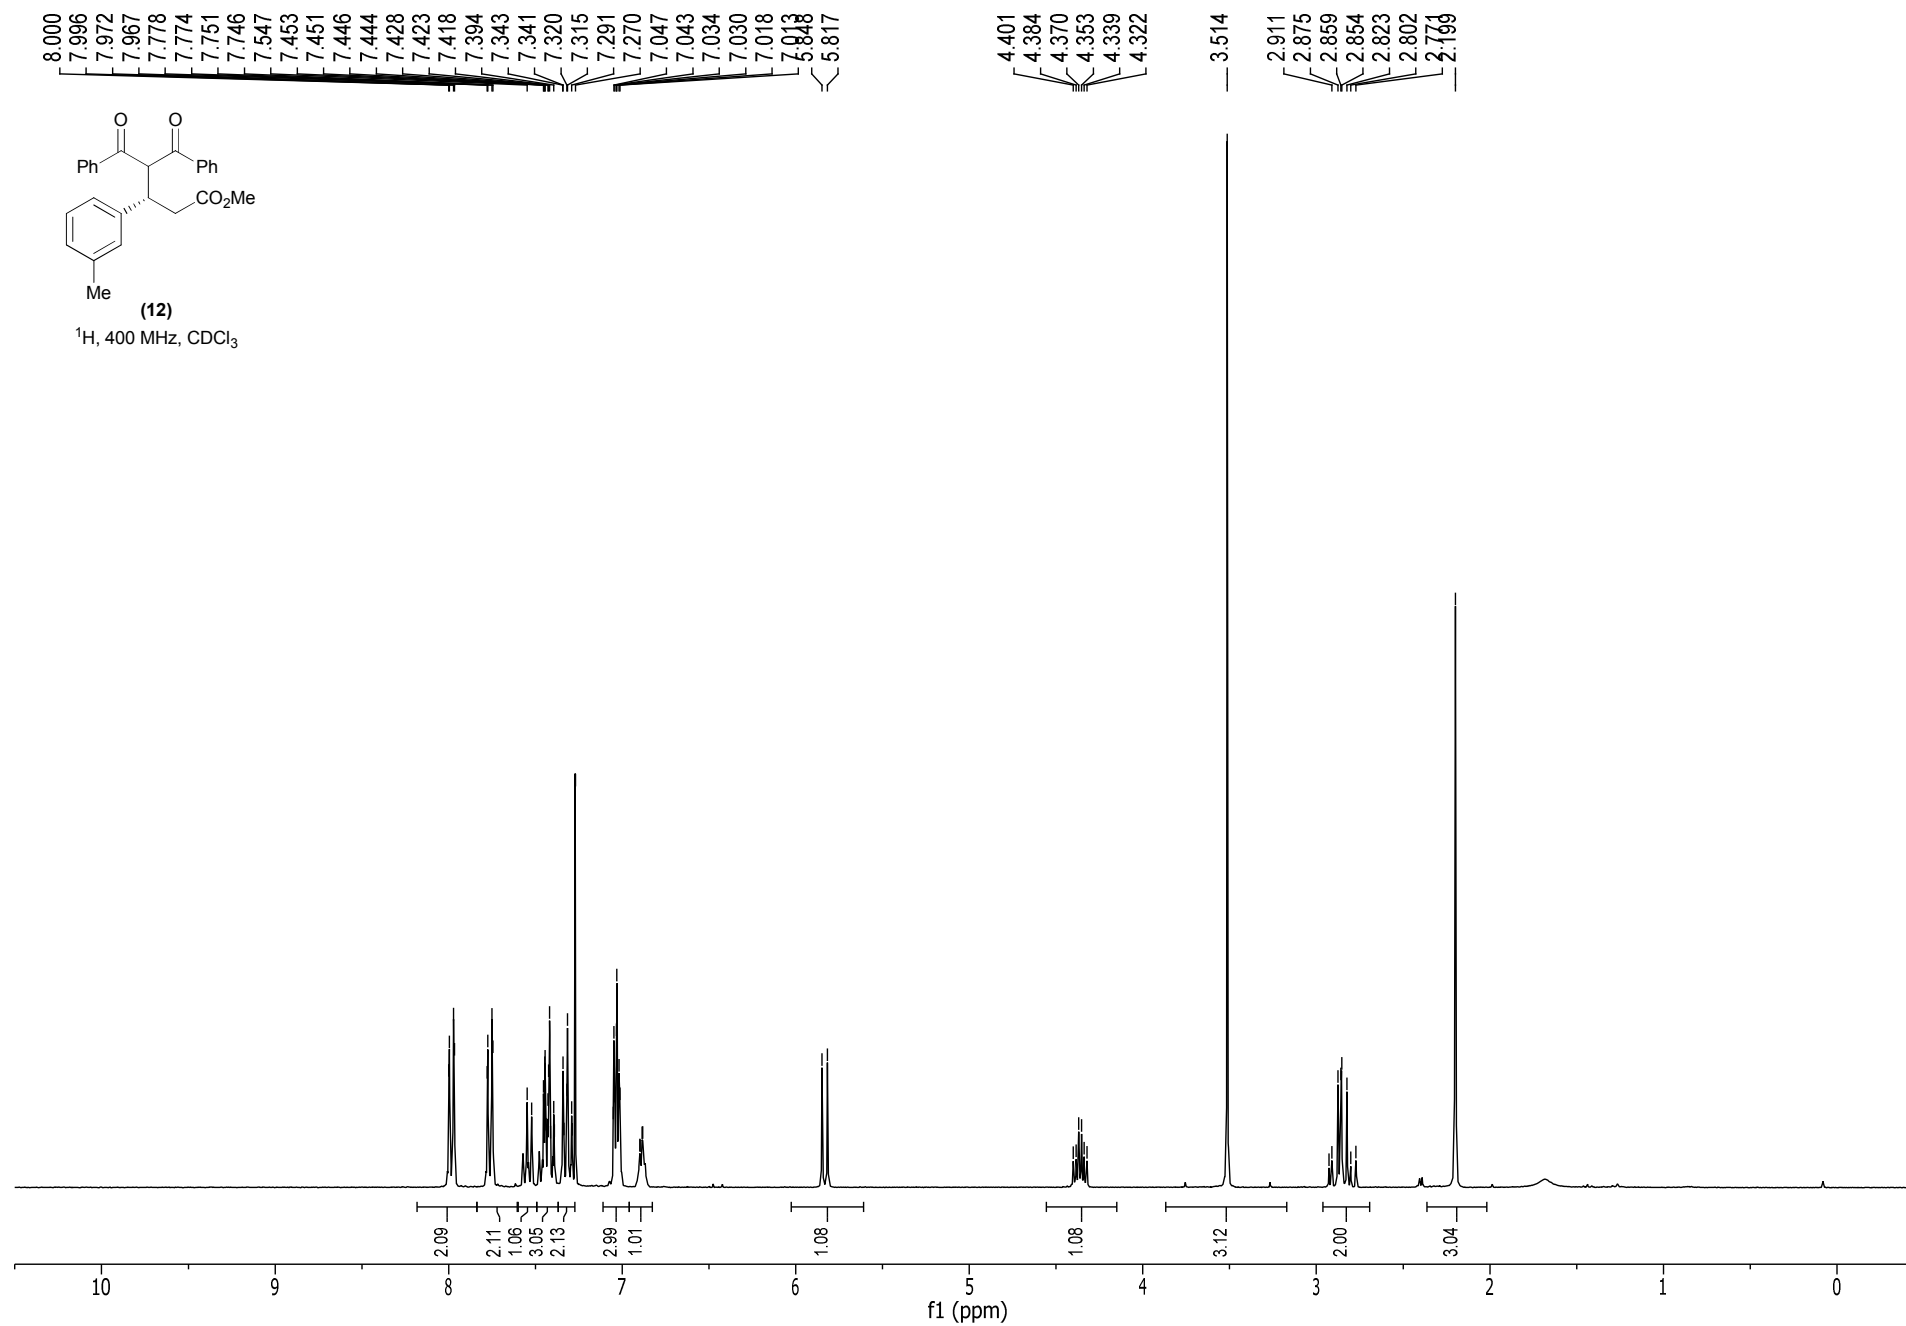

Supporting Information

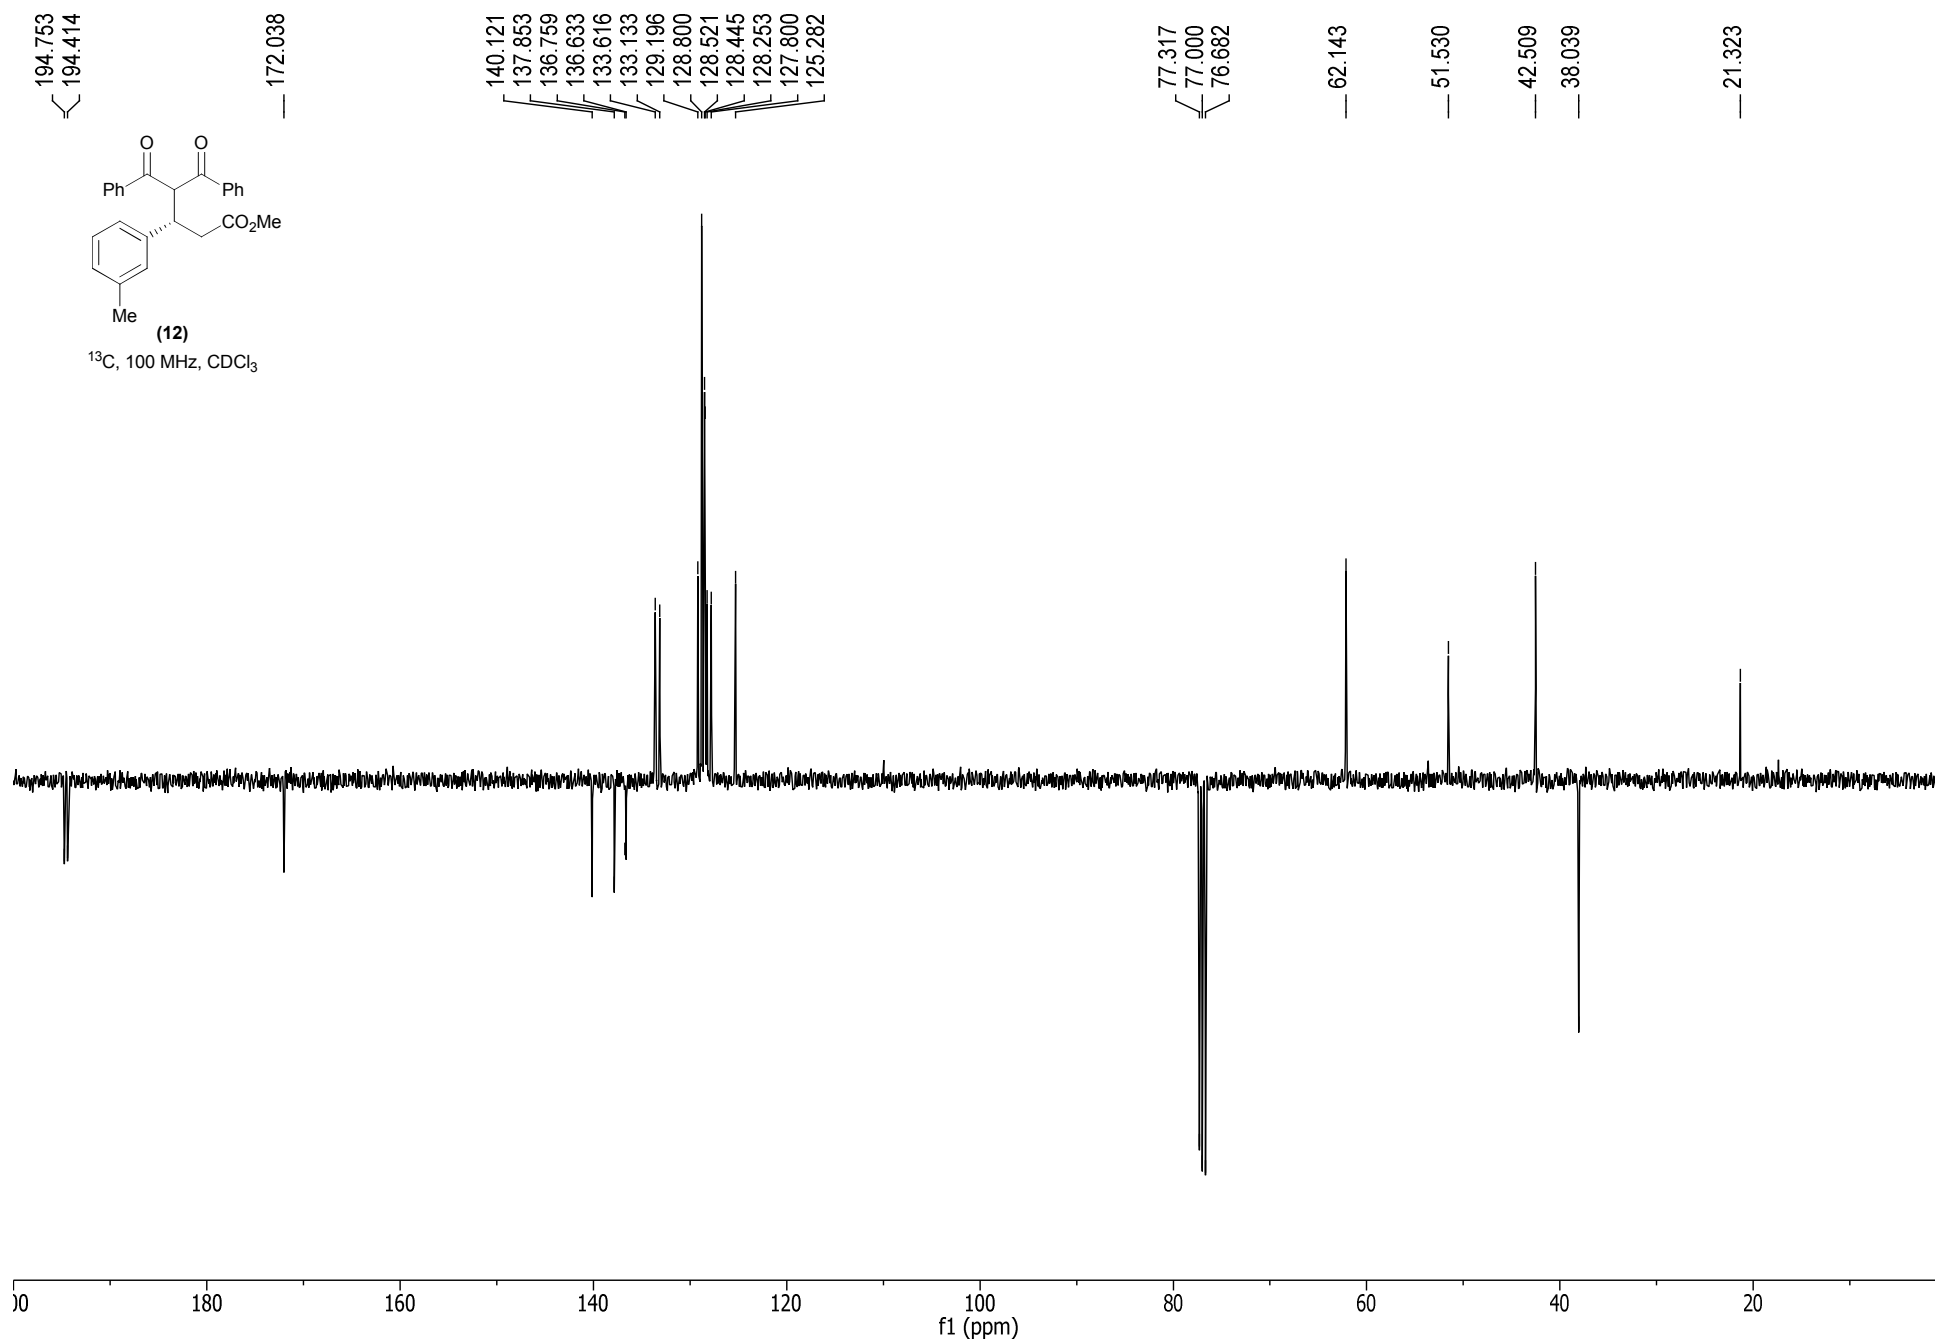



Supporting Information

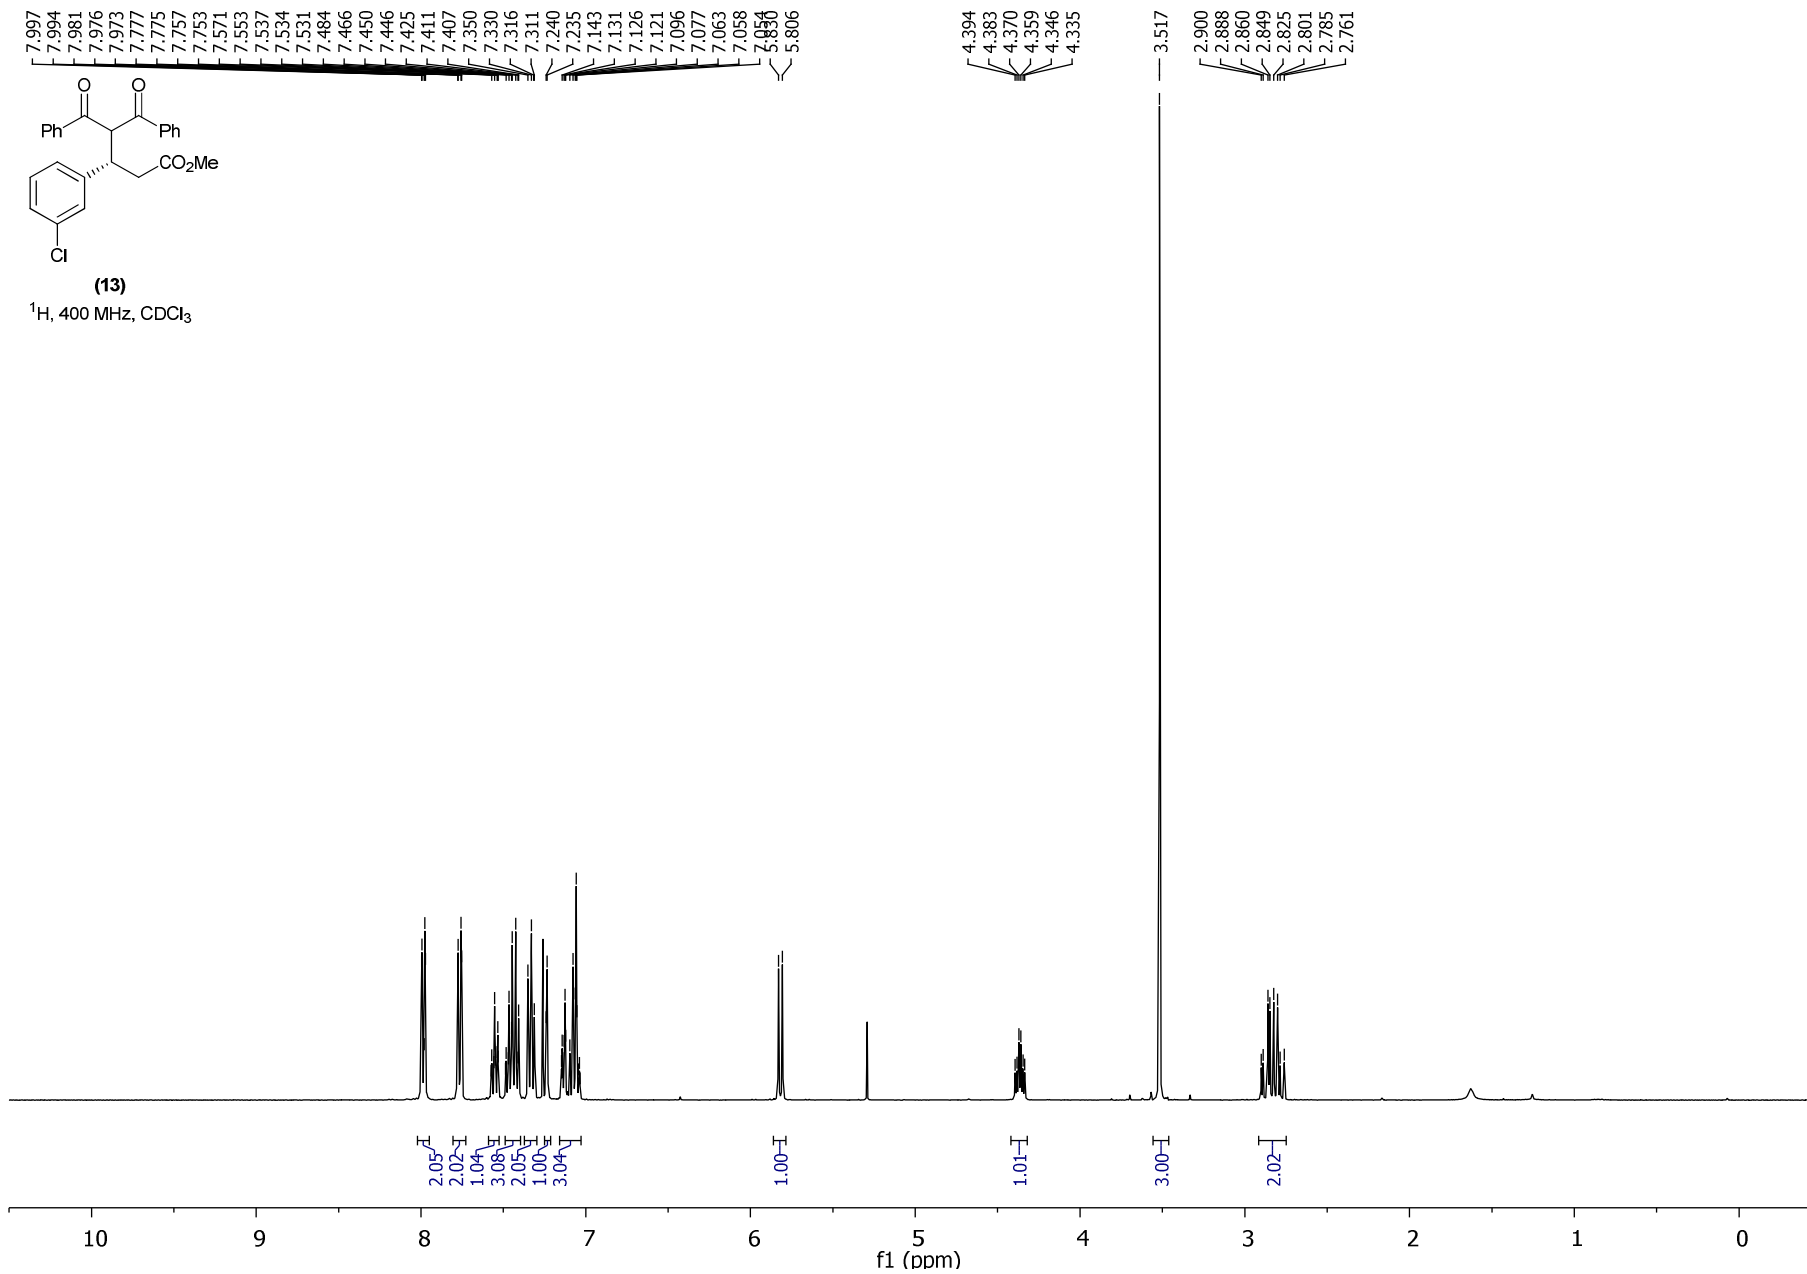

Supporting Information

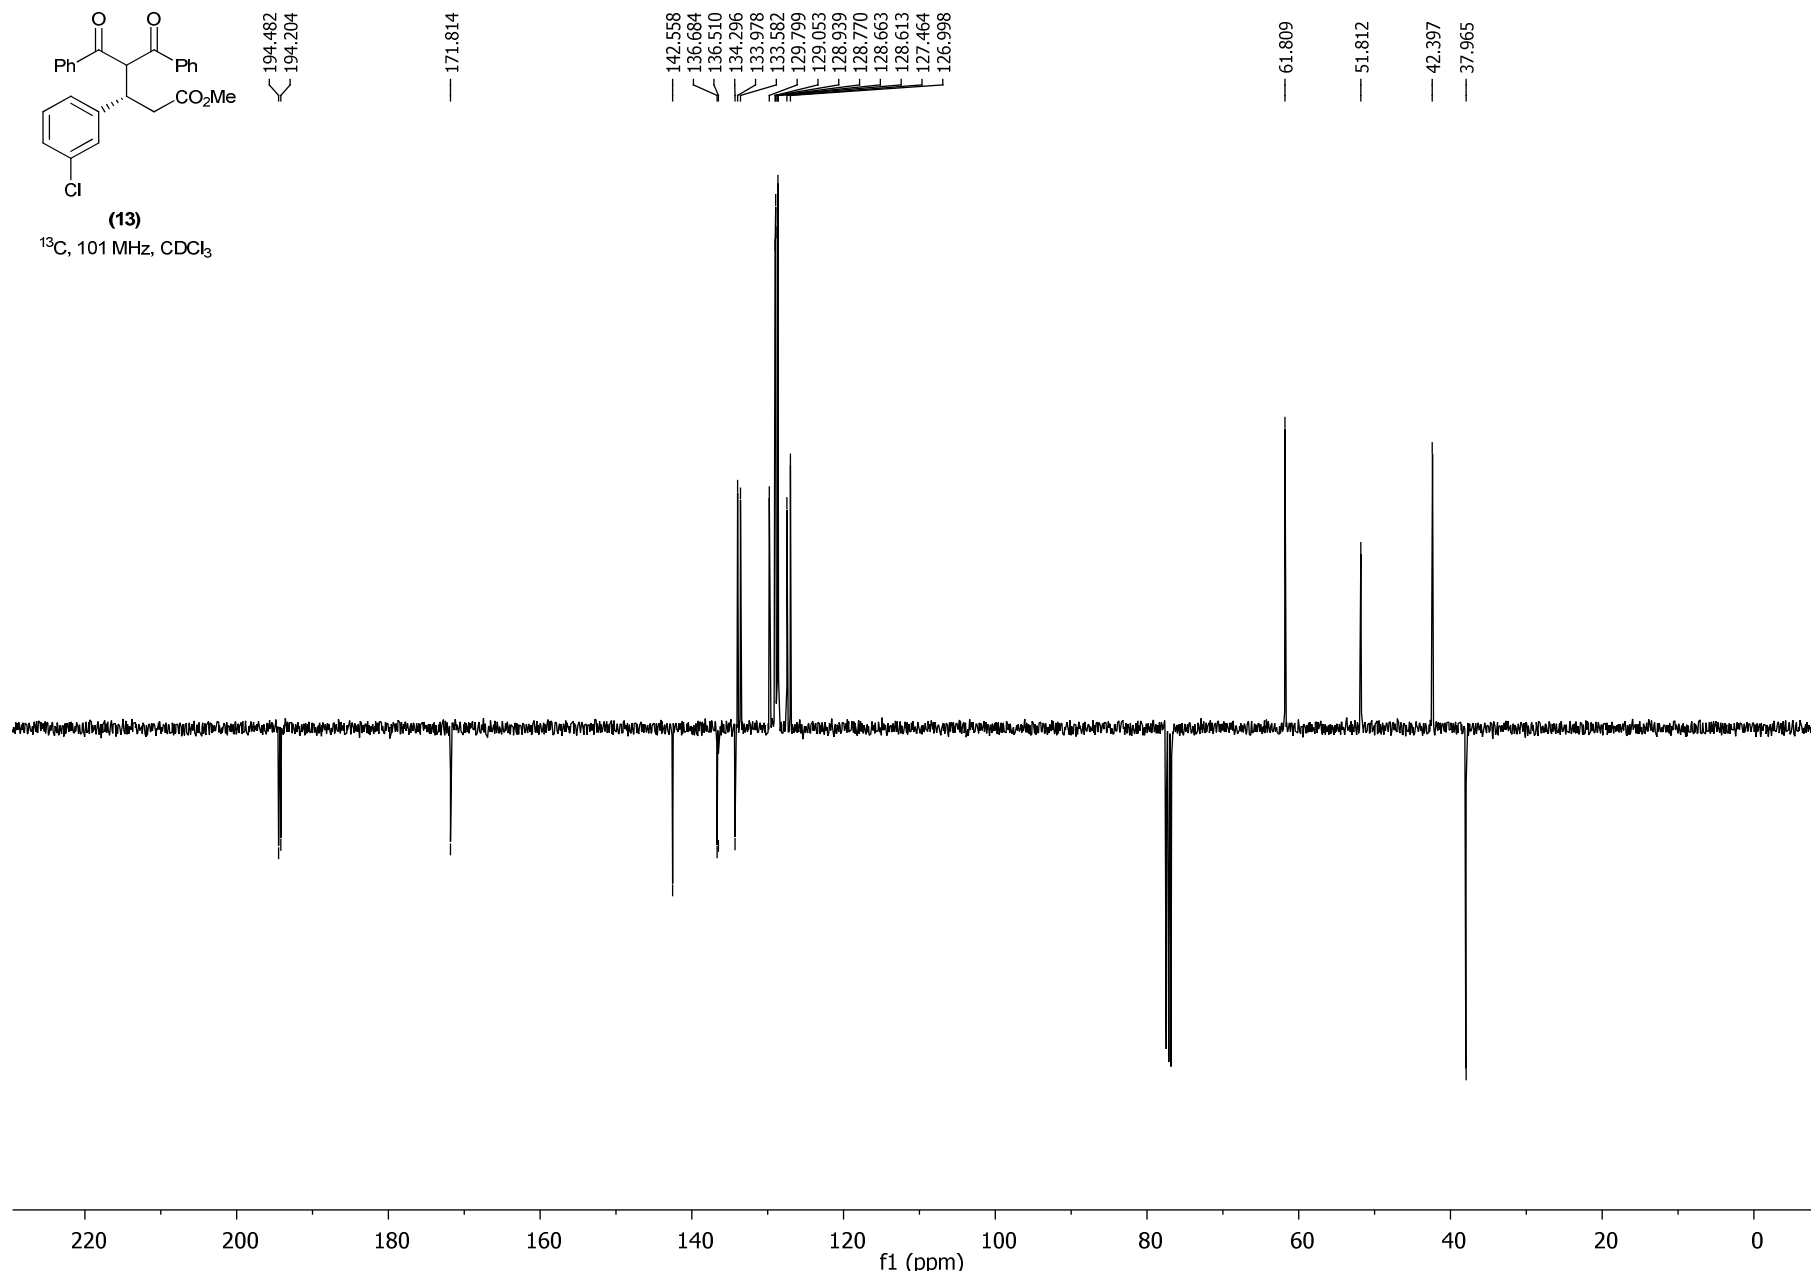

Supporting Information

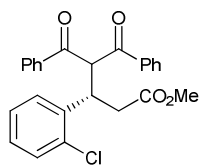

(14)

<sup>1</sup>H, 400 MHz, CDCl<sub>3</sub>

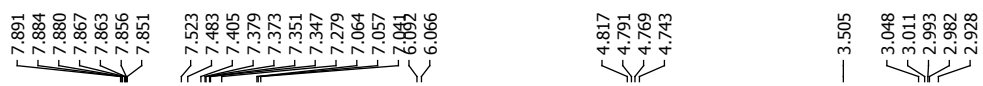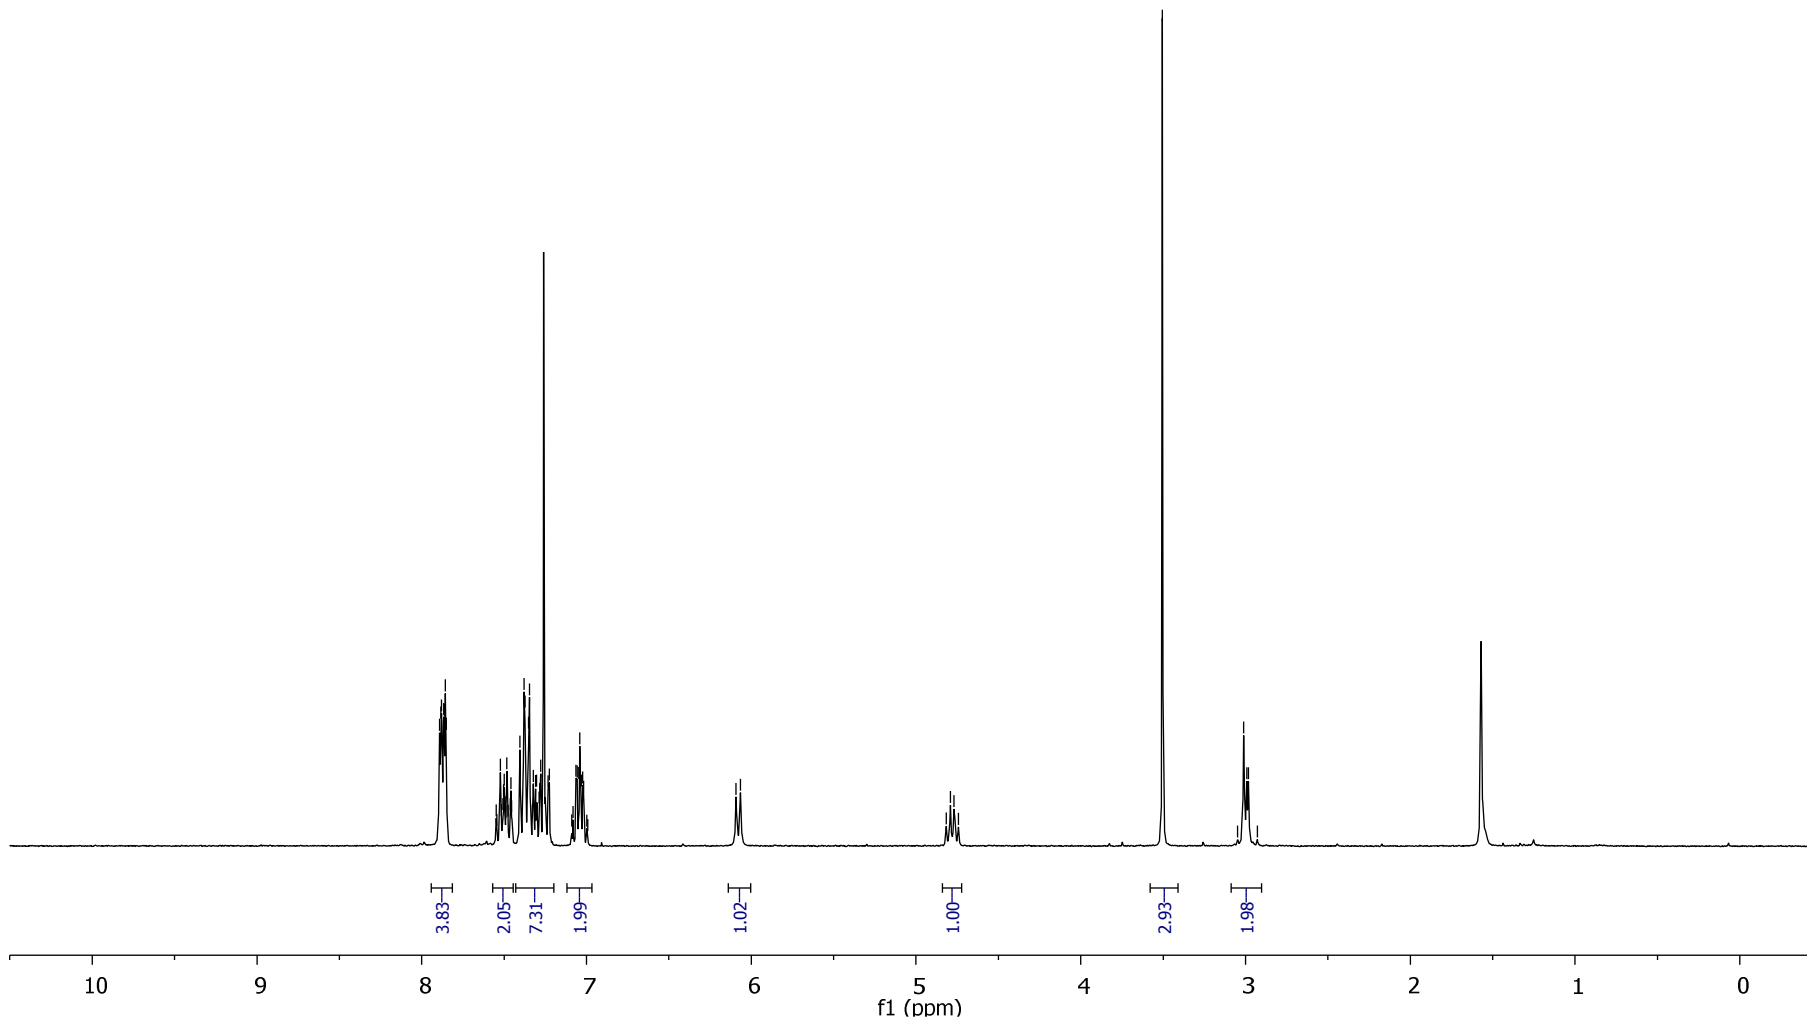

Supporting Information

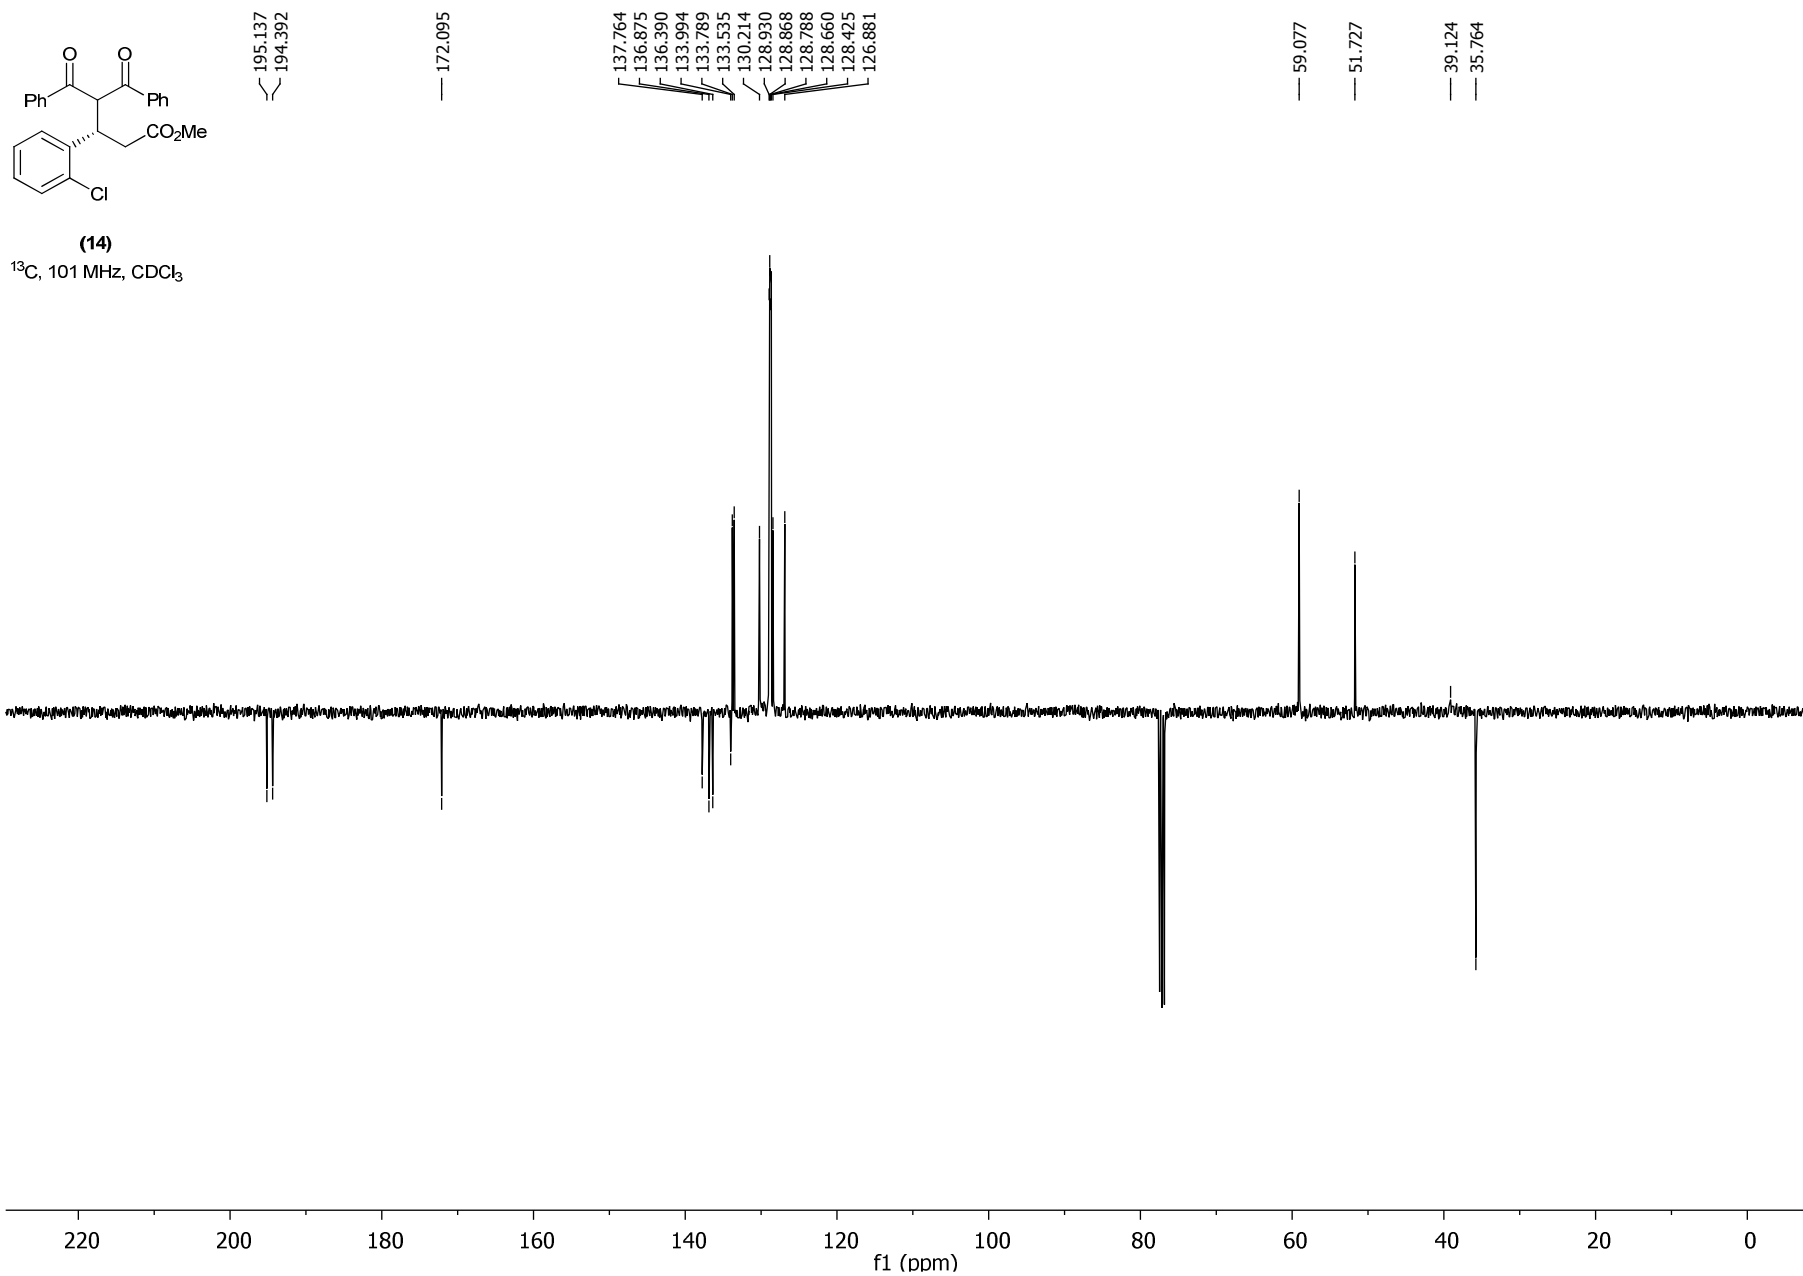

Supporting Information

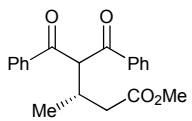

(15)

<sup>1</sup>H, 400 MHz, CDCl<sub>3</sub>

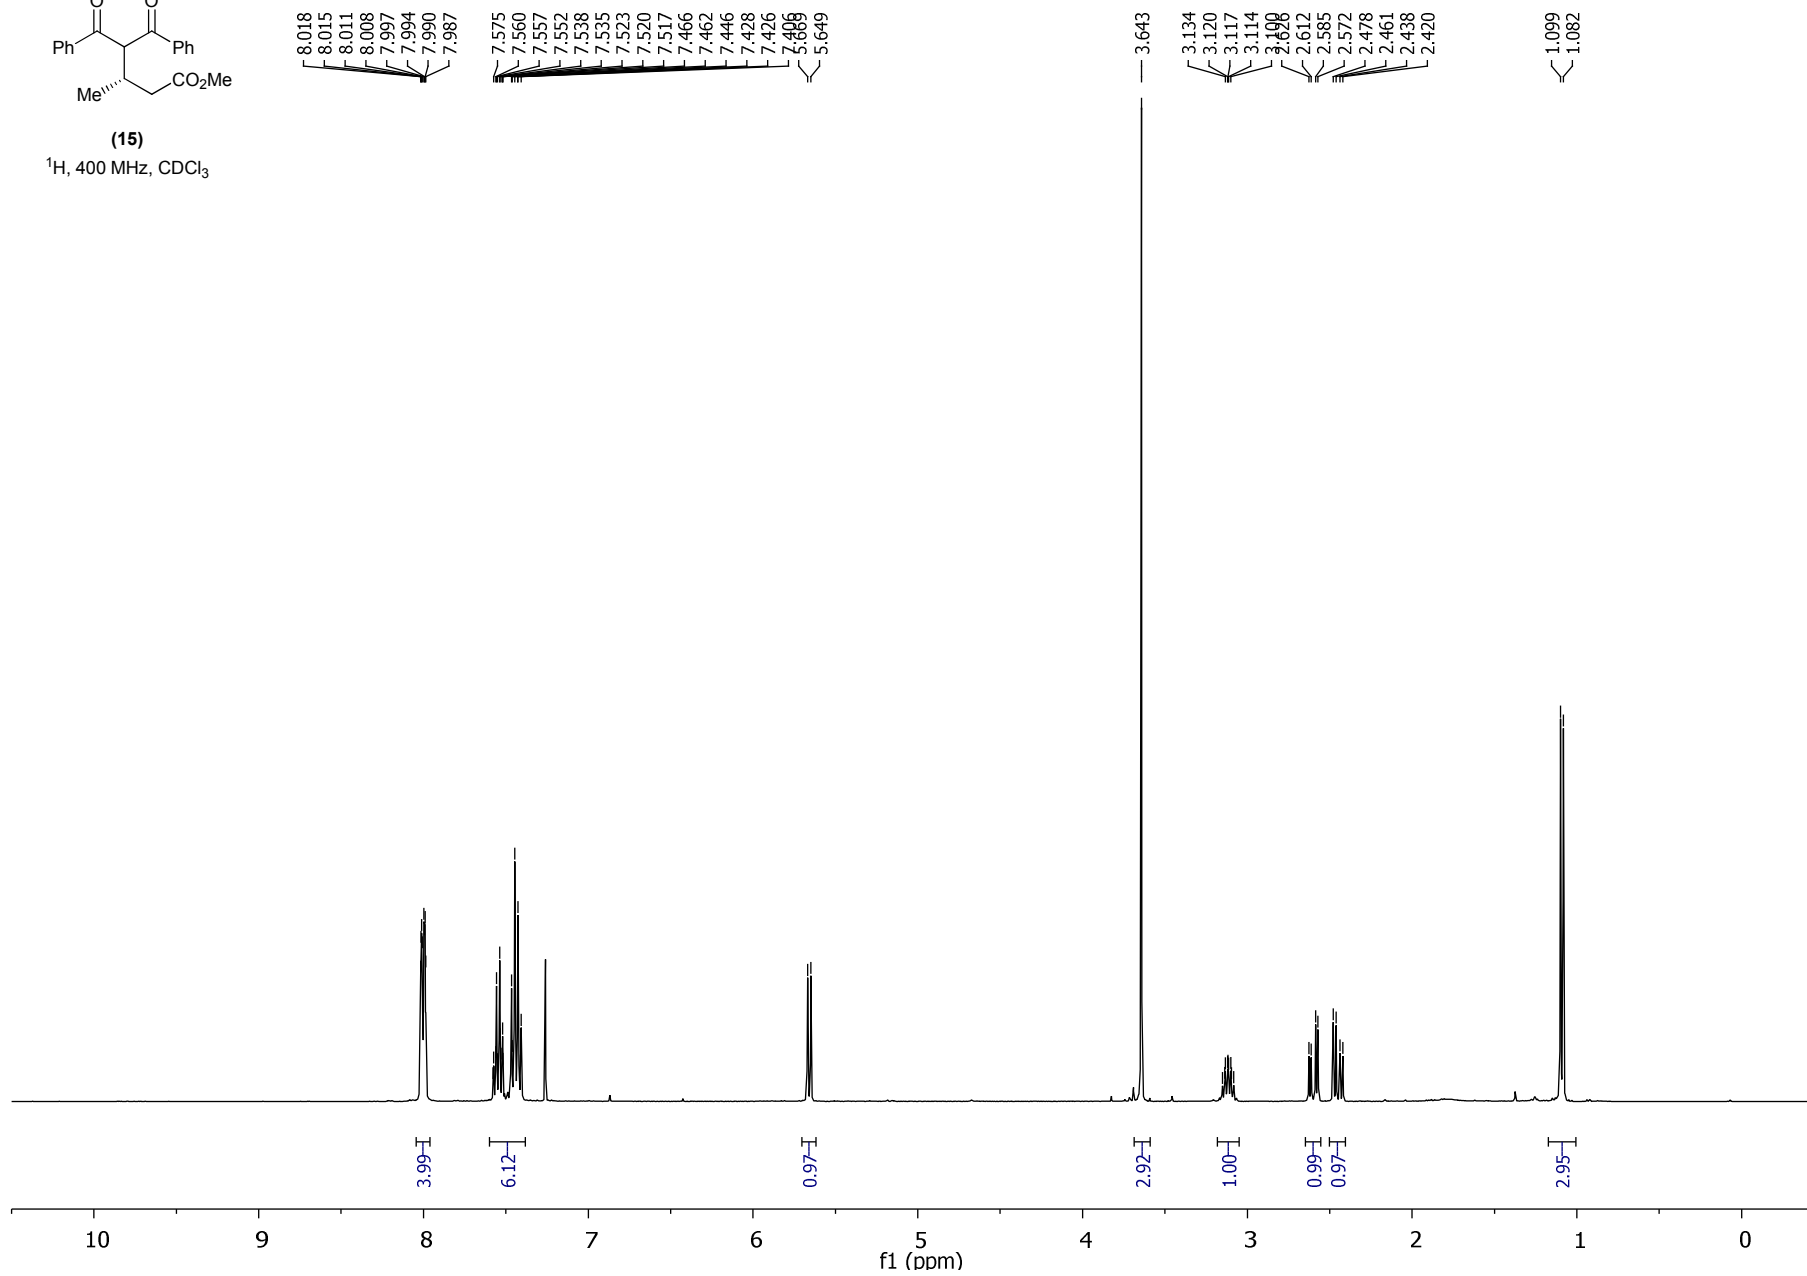

Supporting Information

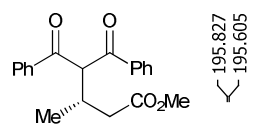

(15)

$^{13}\text{C}$ , 101 MHz,  $\text{CDCl}_3$

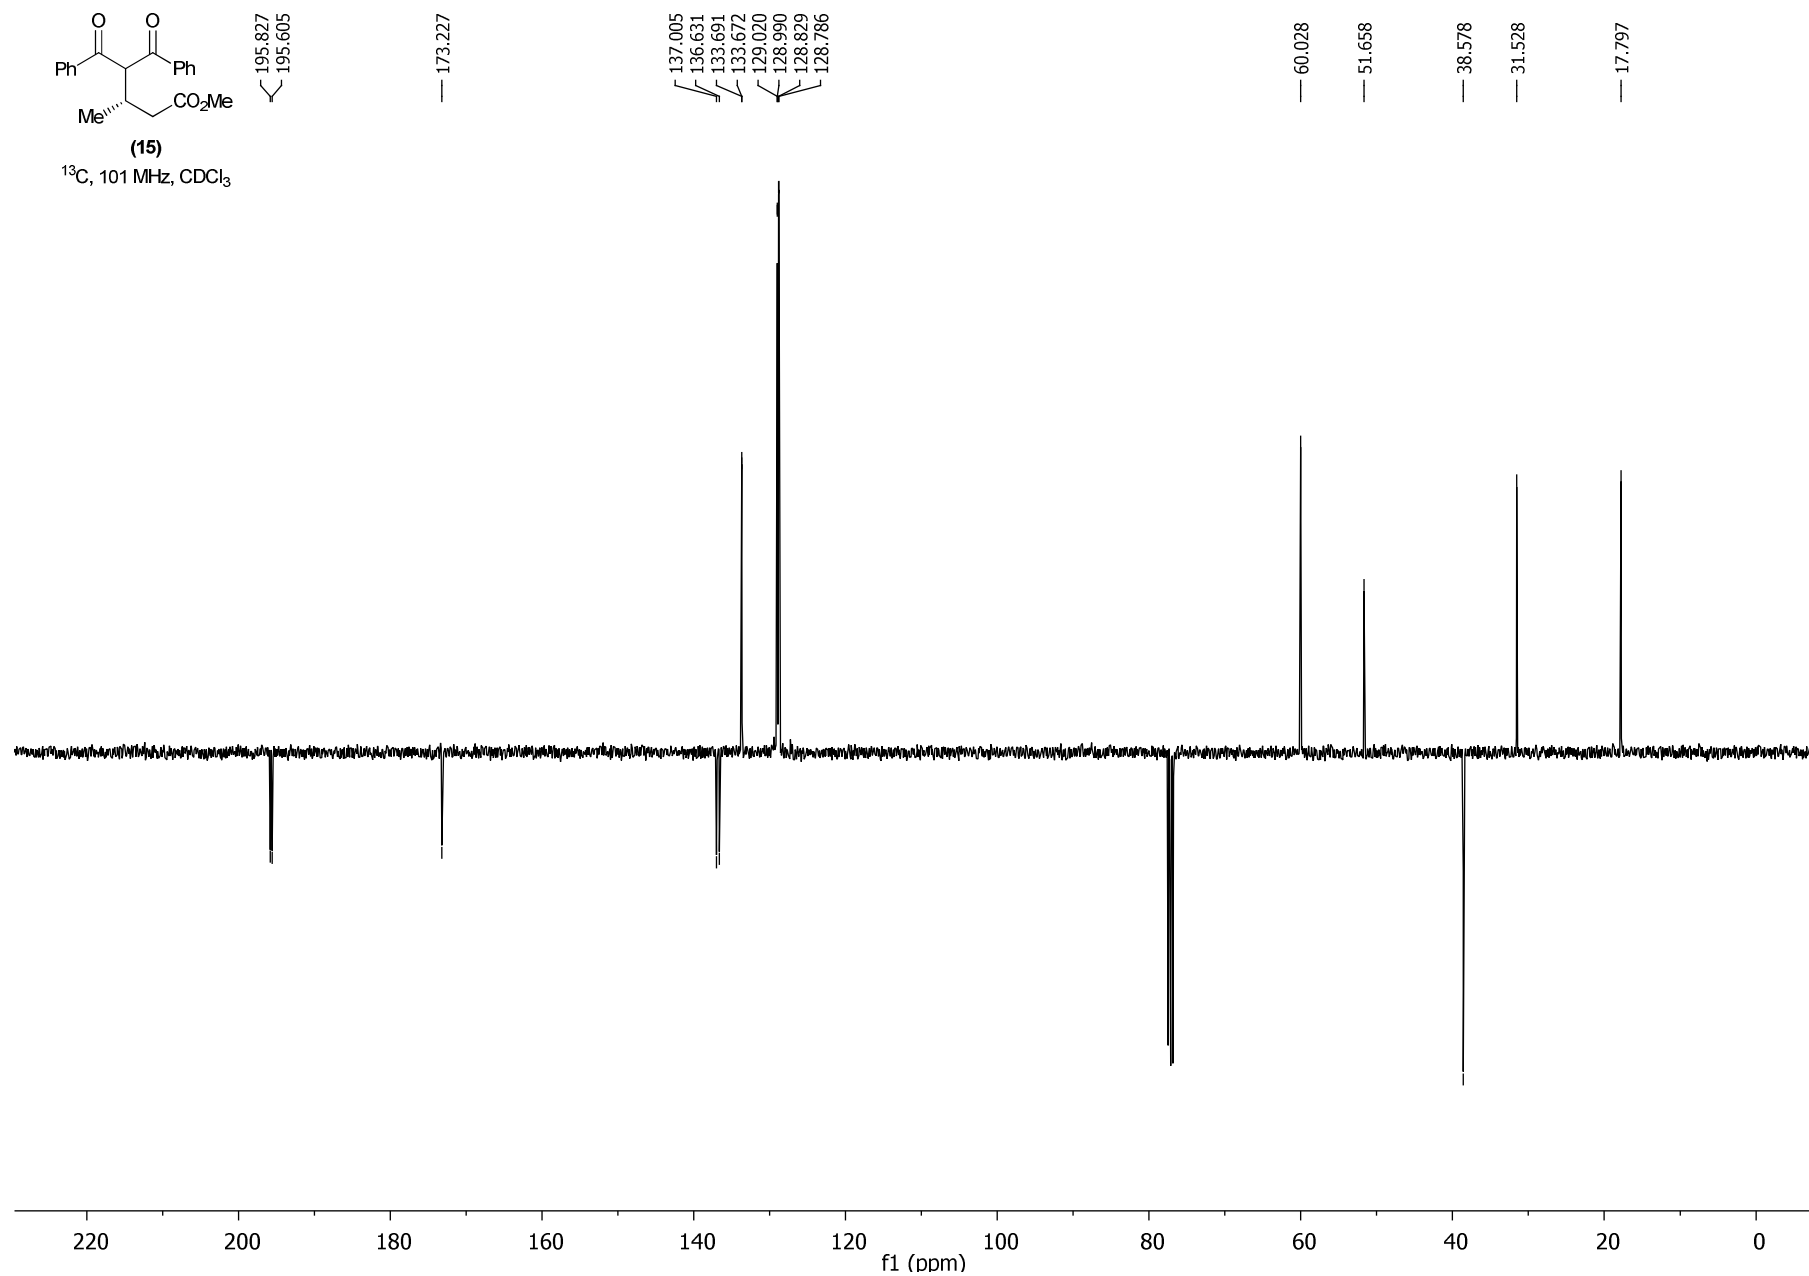

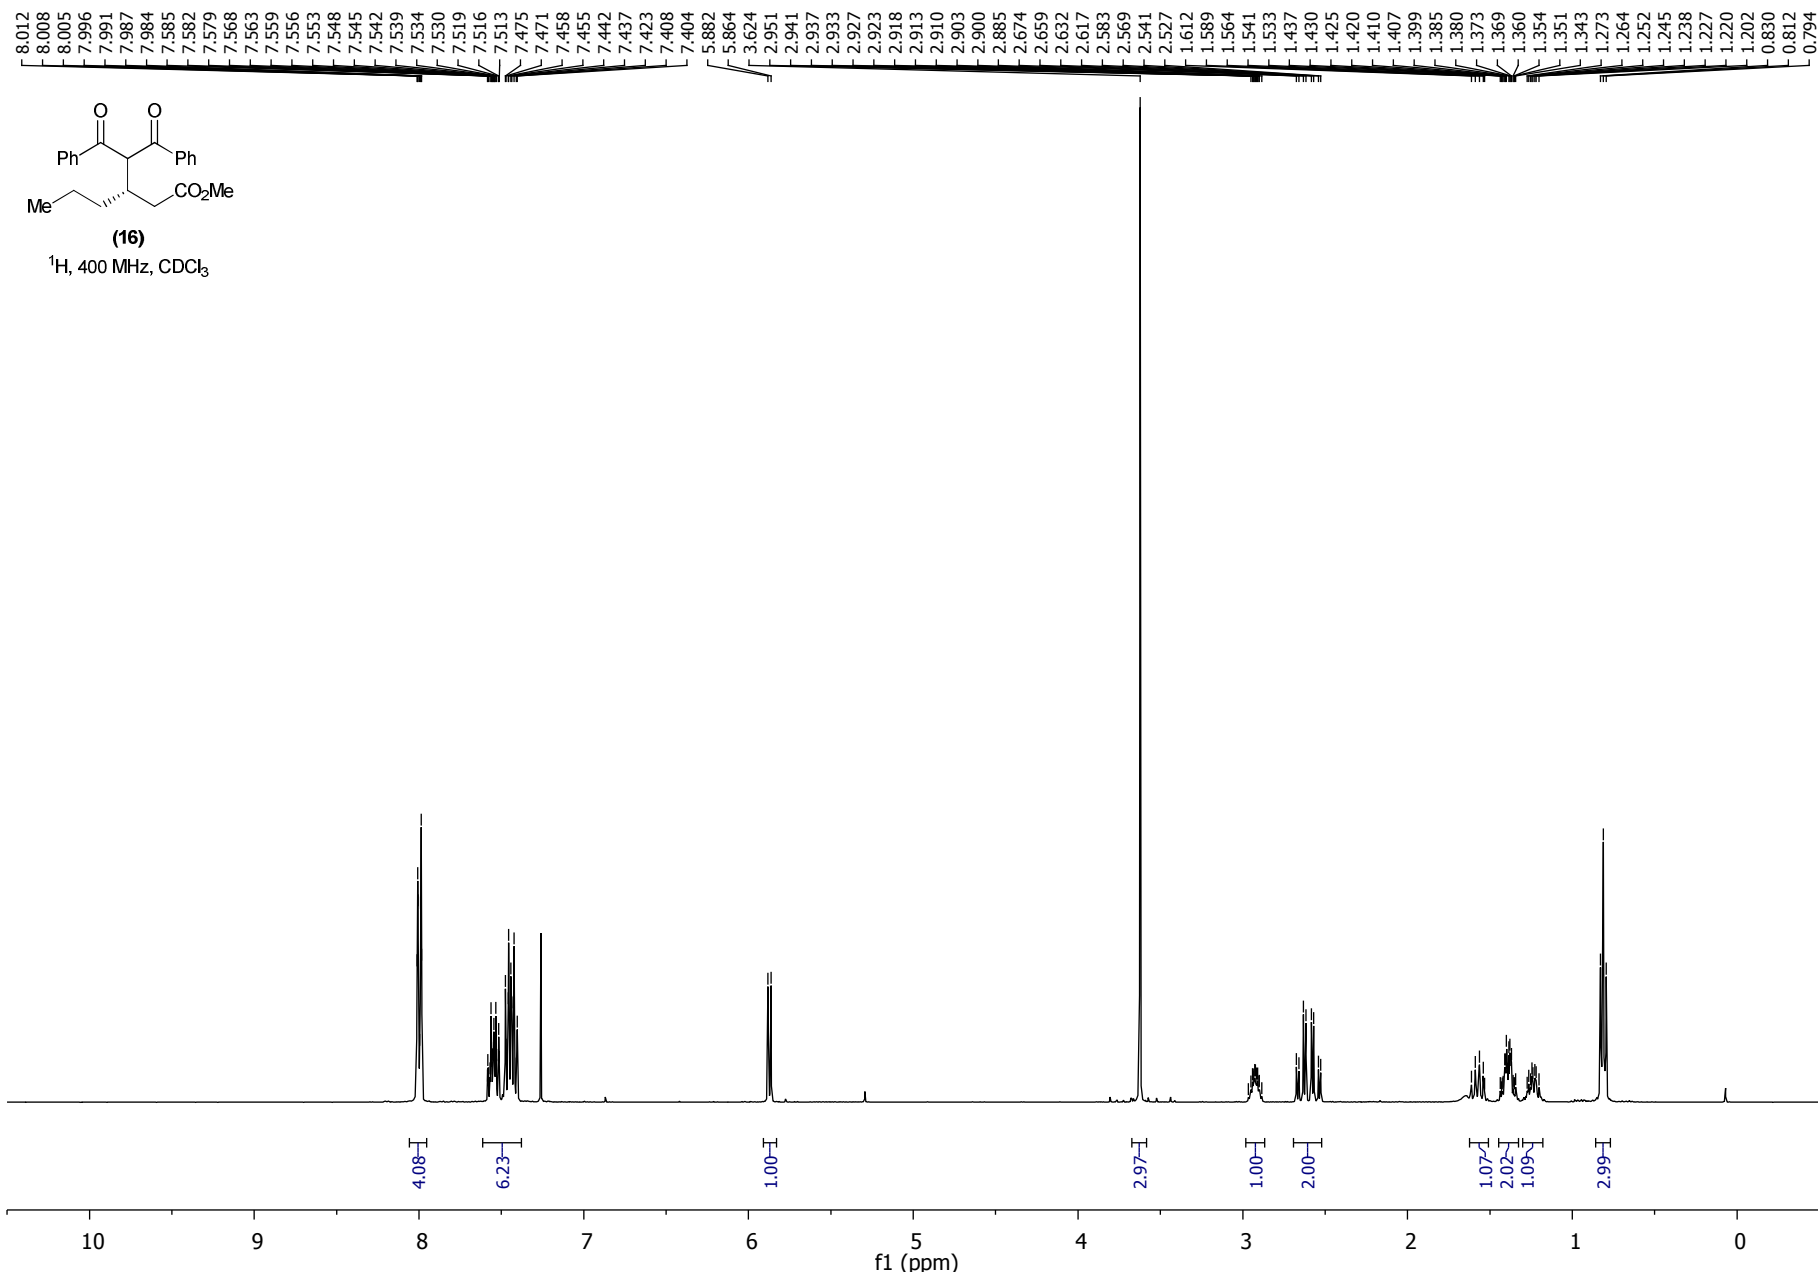

Supporting Information

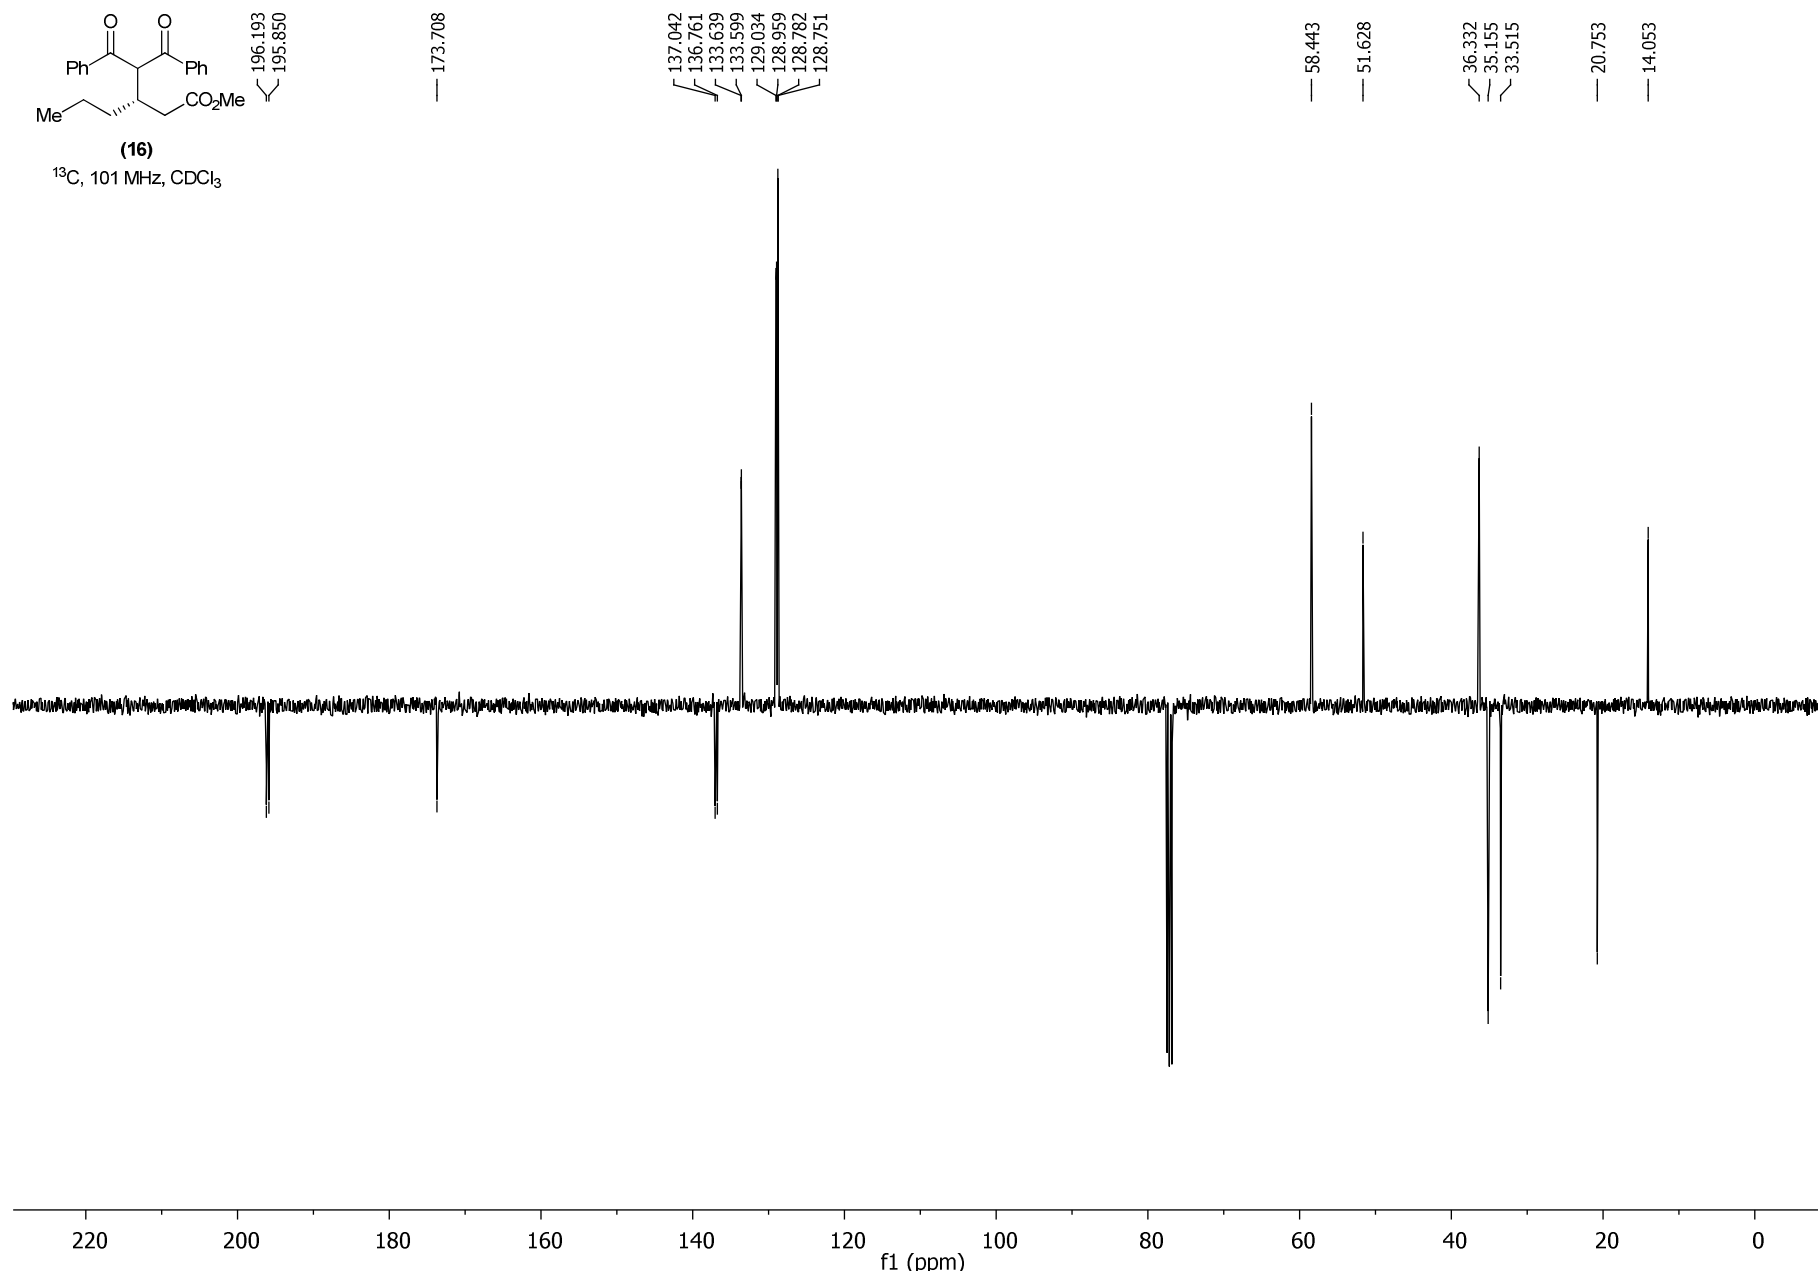



Supporting Information

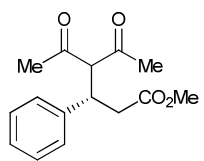

(S16)

<sup>1</sup>H, 400 MHz, CDCl<sub>3</sub>

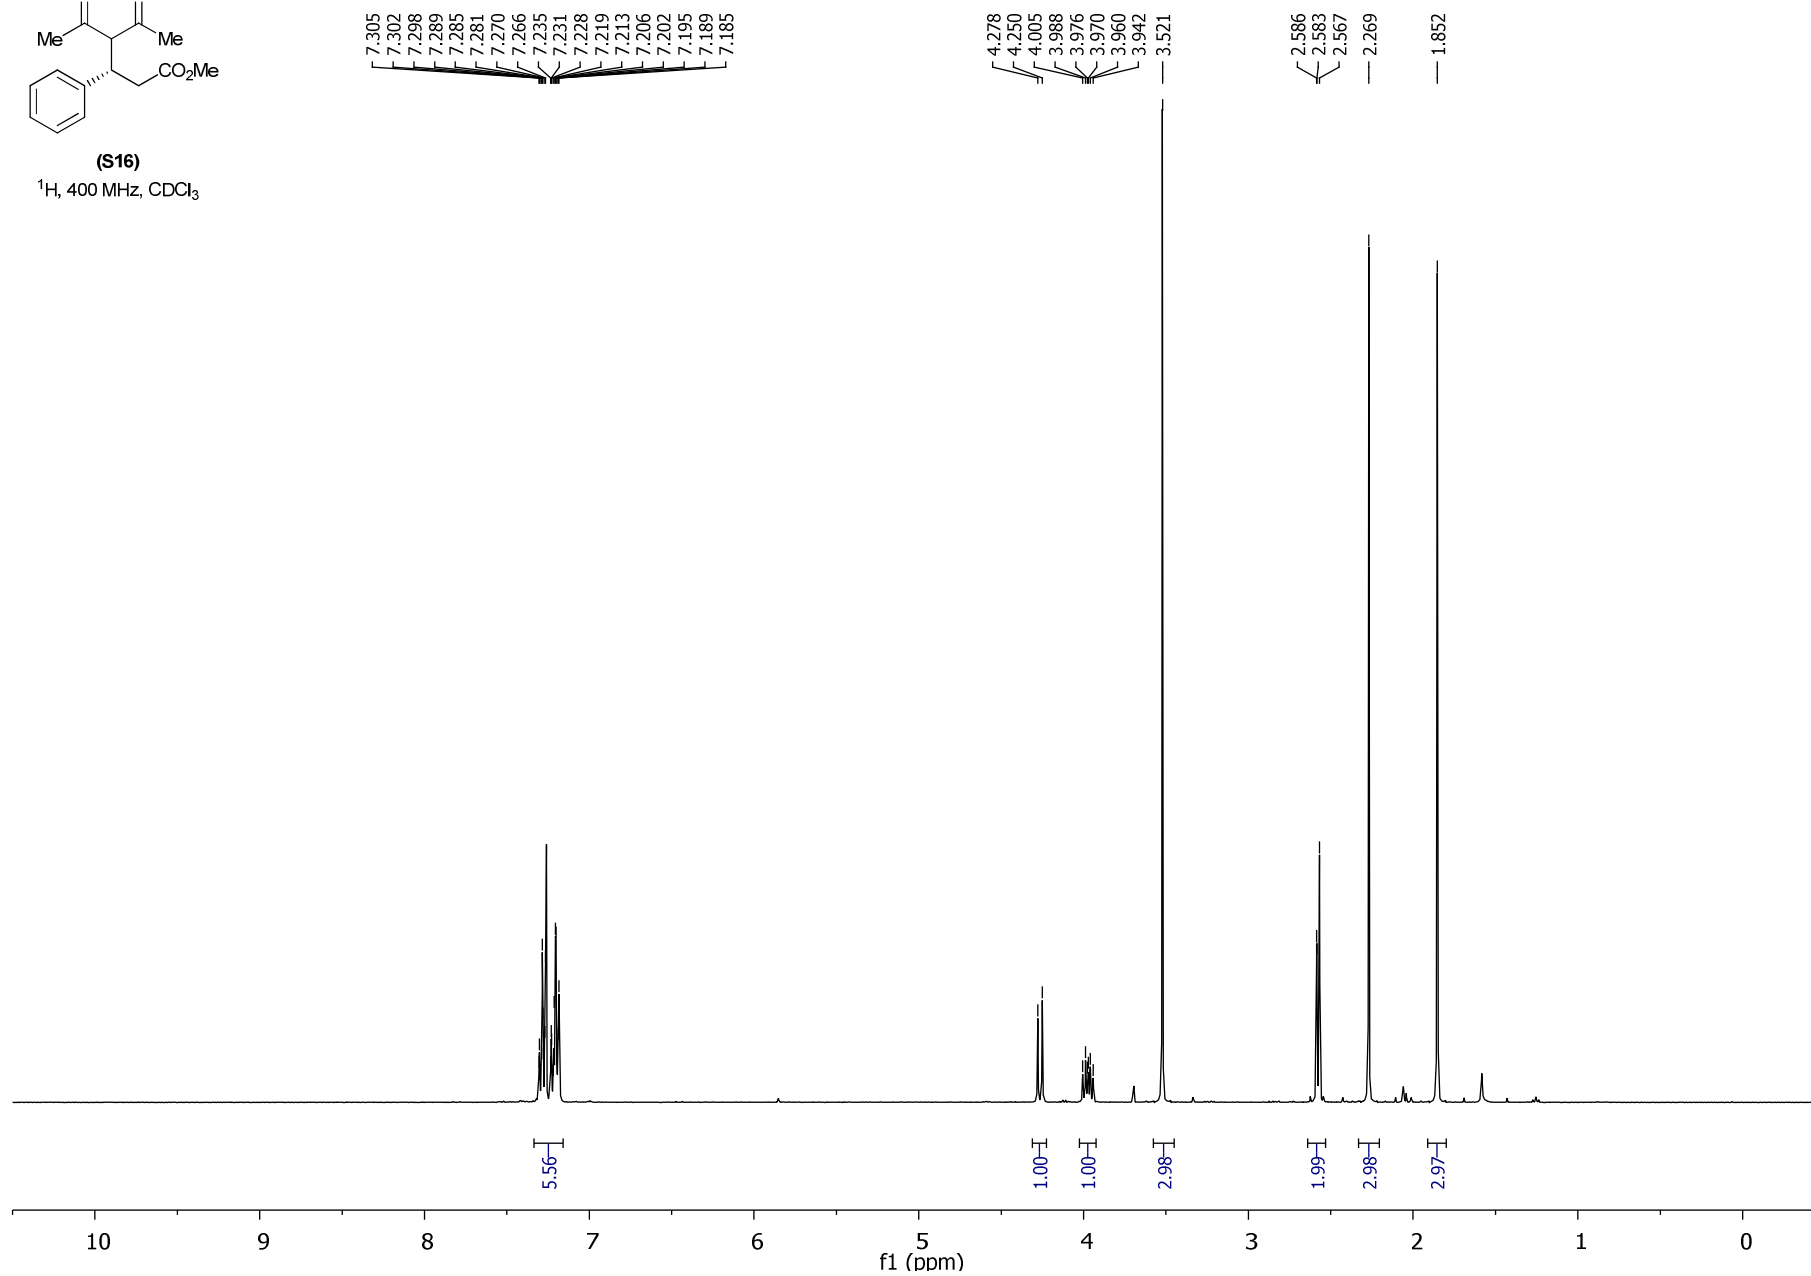

Supporting Information

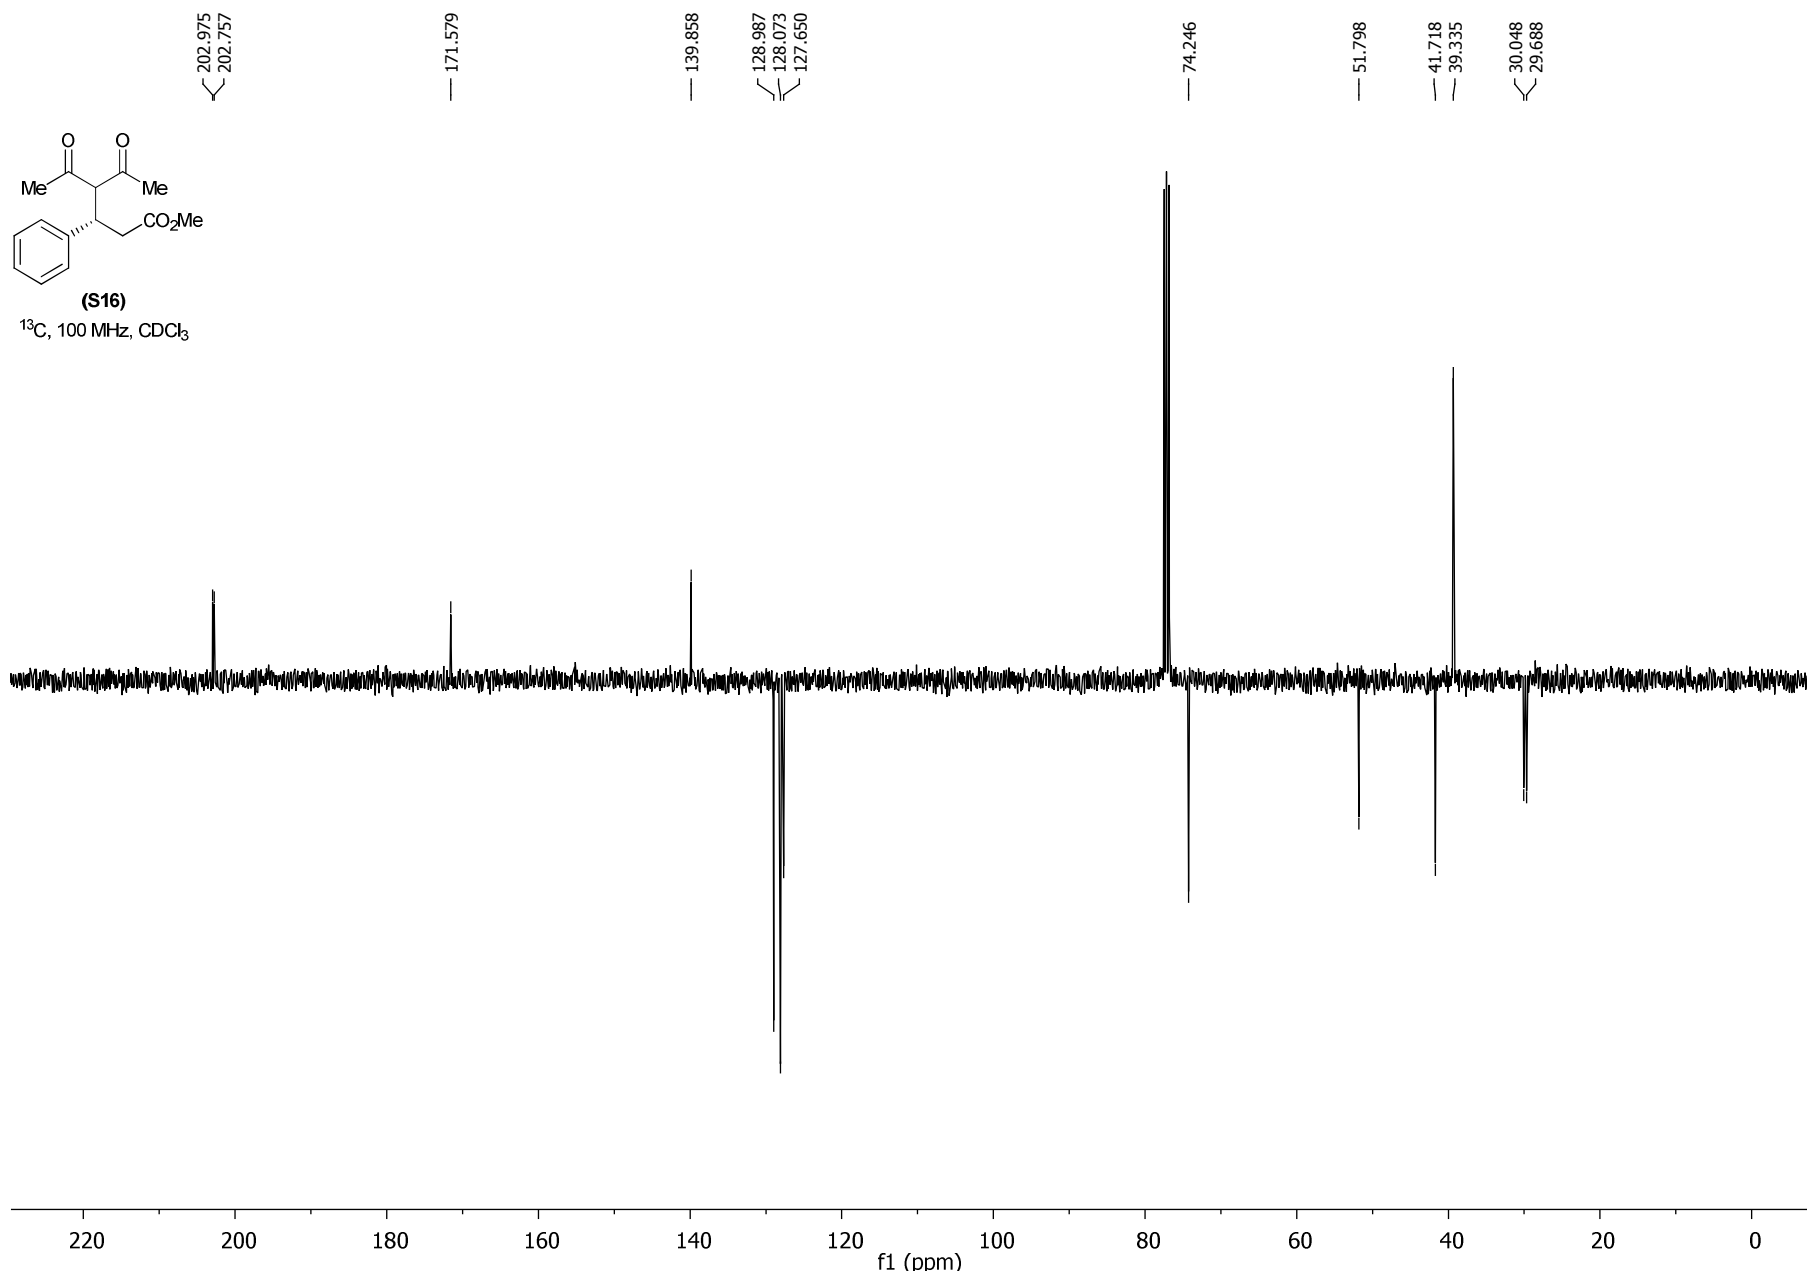

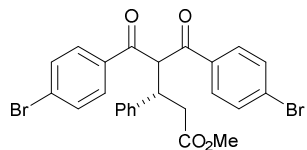

(17)

$^1\text{H}$ , 400 MHz,  $\text{CDCl}_3$

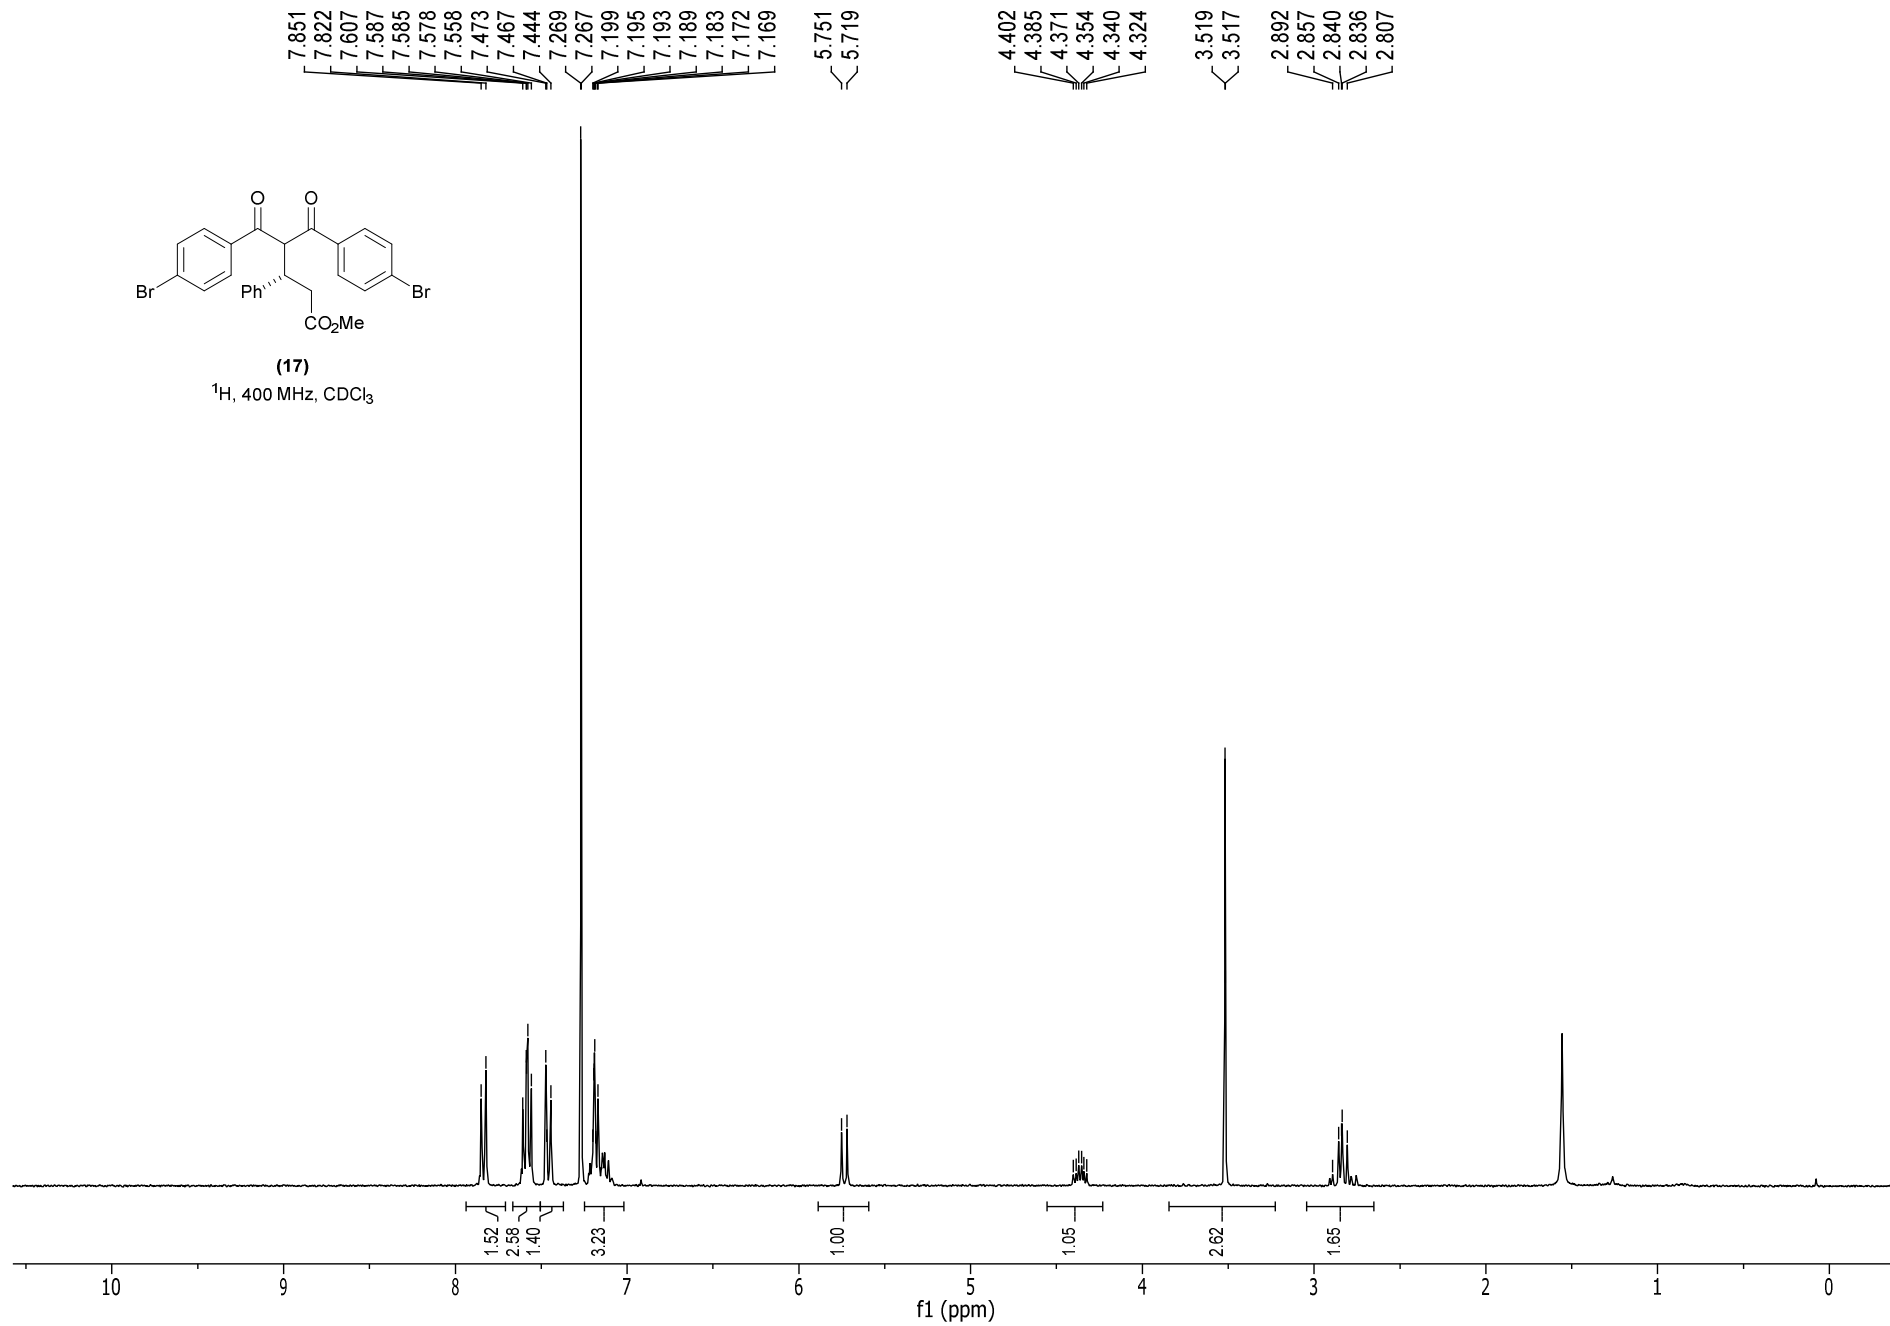

Supporting Information

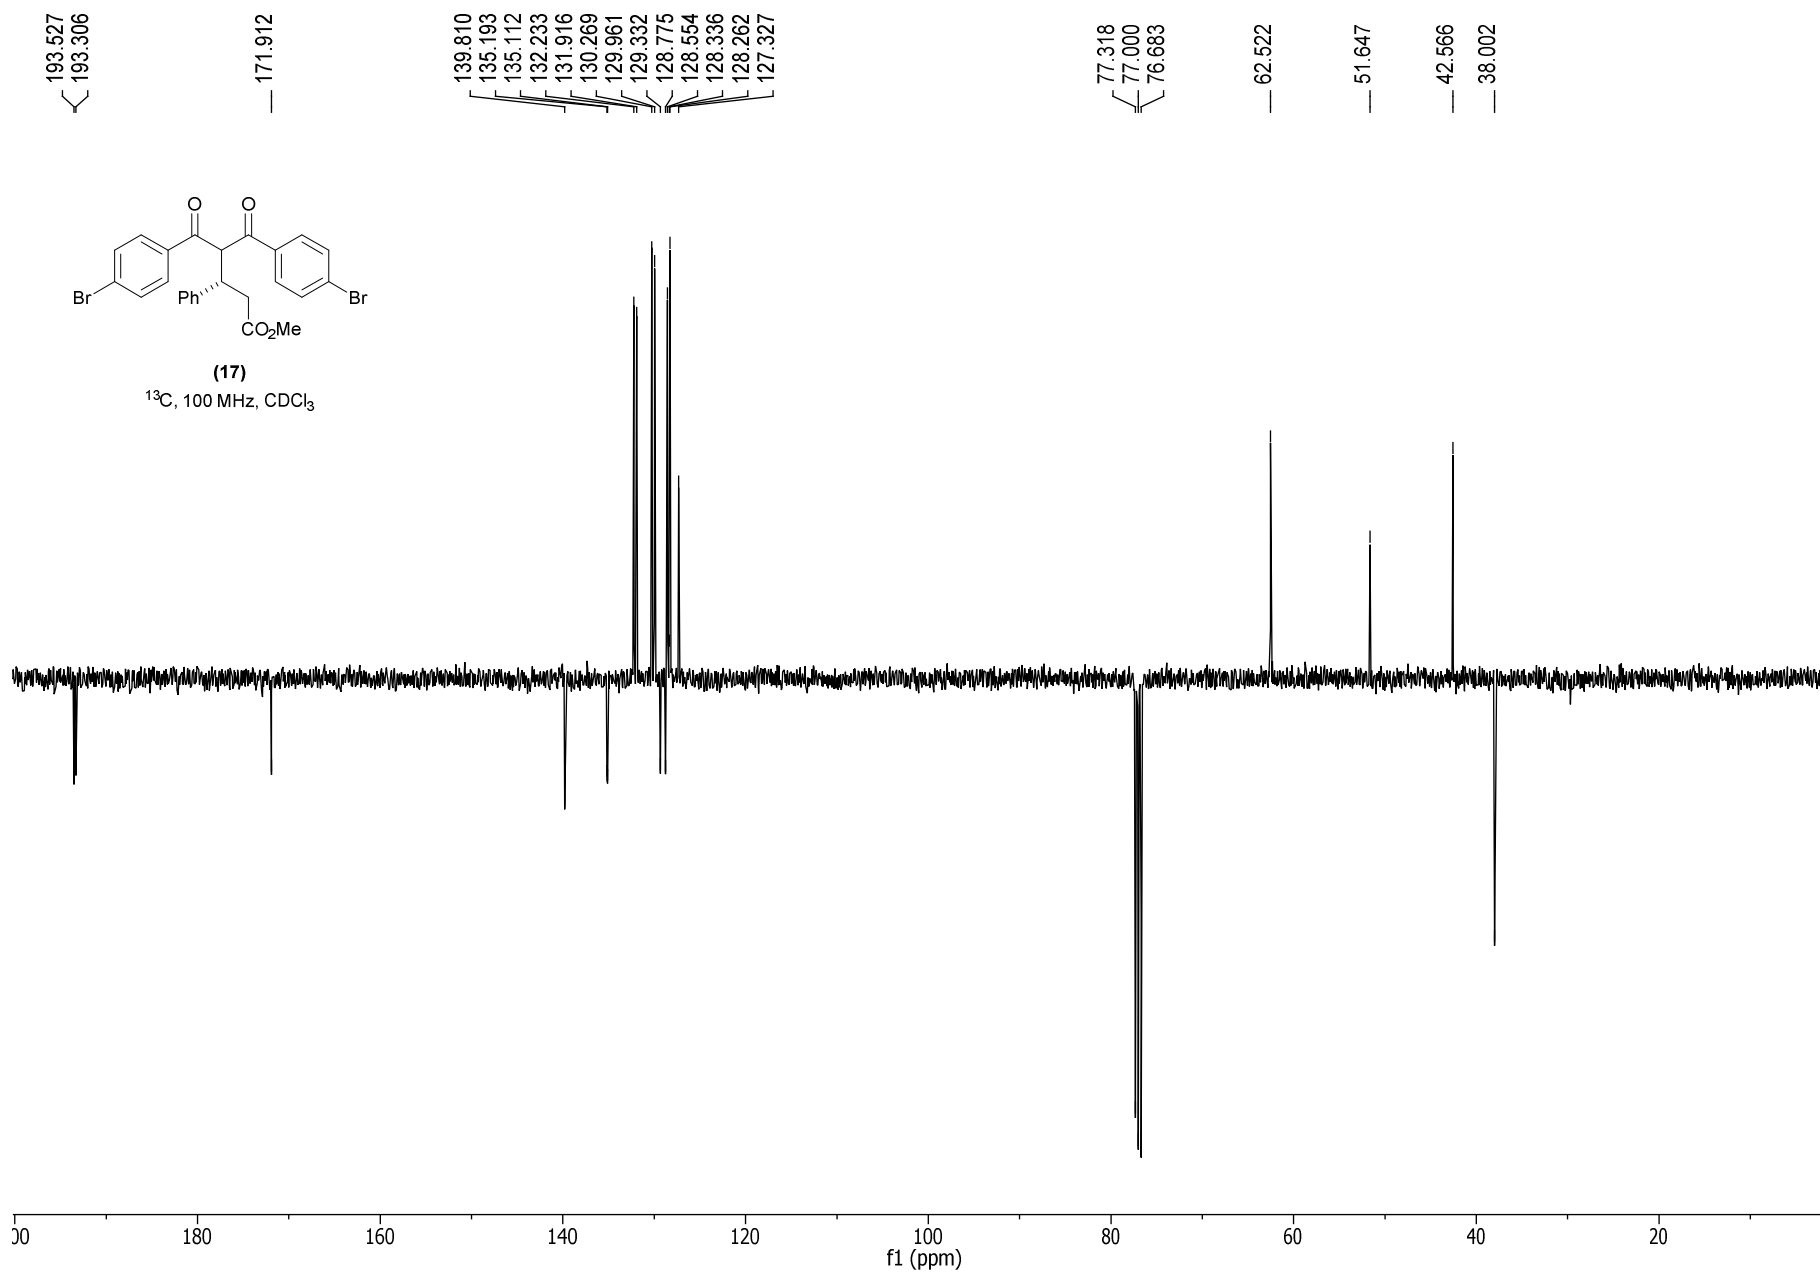

Supporting Information

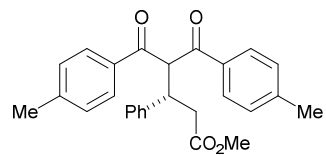

(18)  
<sup>1</sup>H, 400 MHz, CDCl<sub>3</sub>

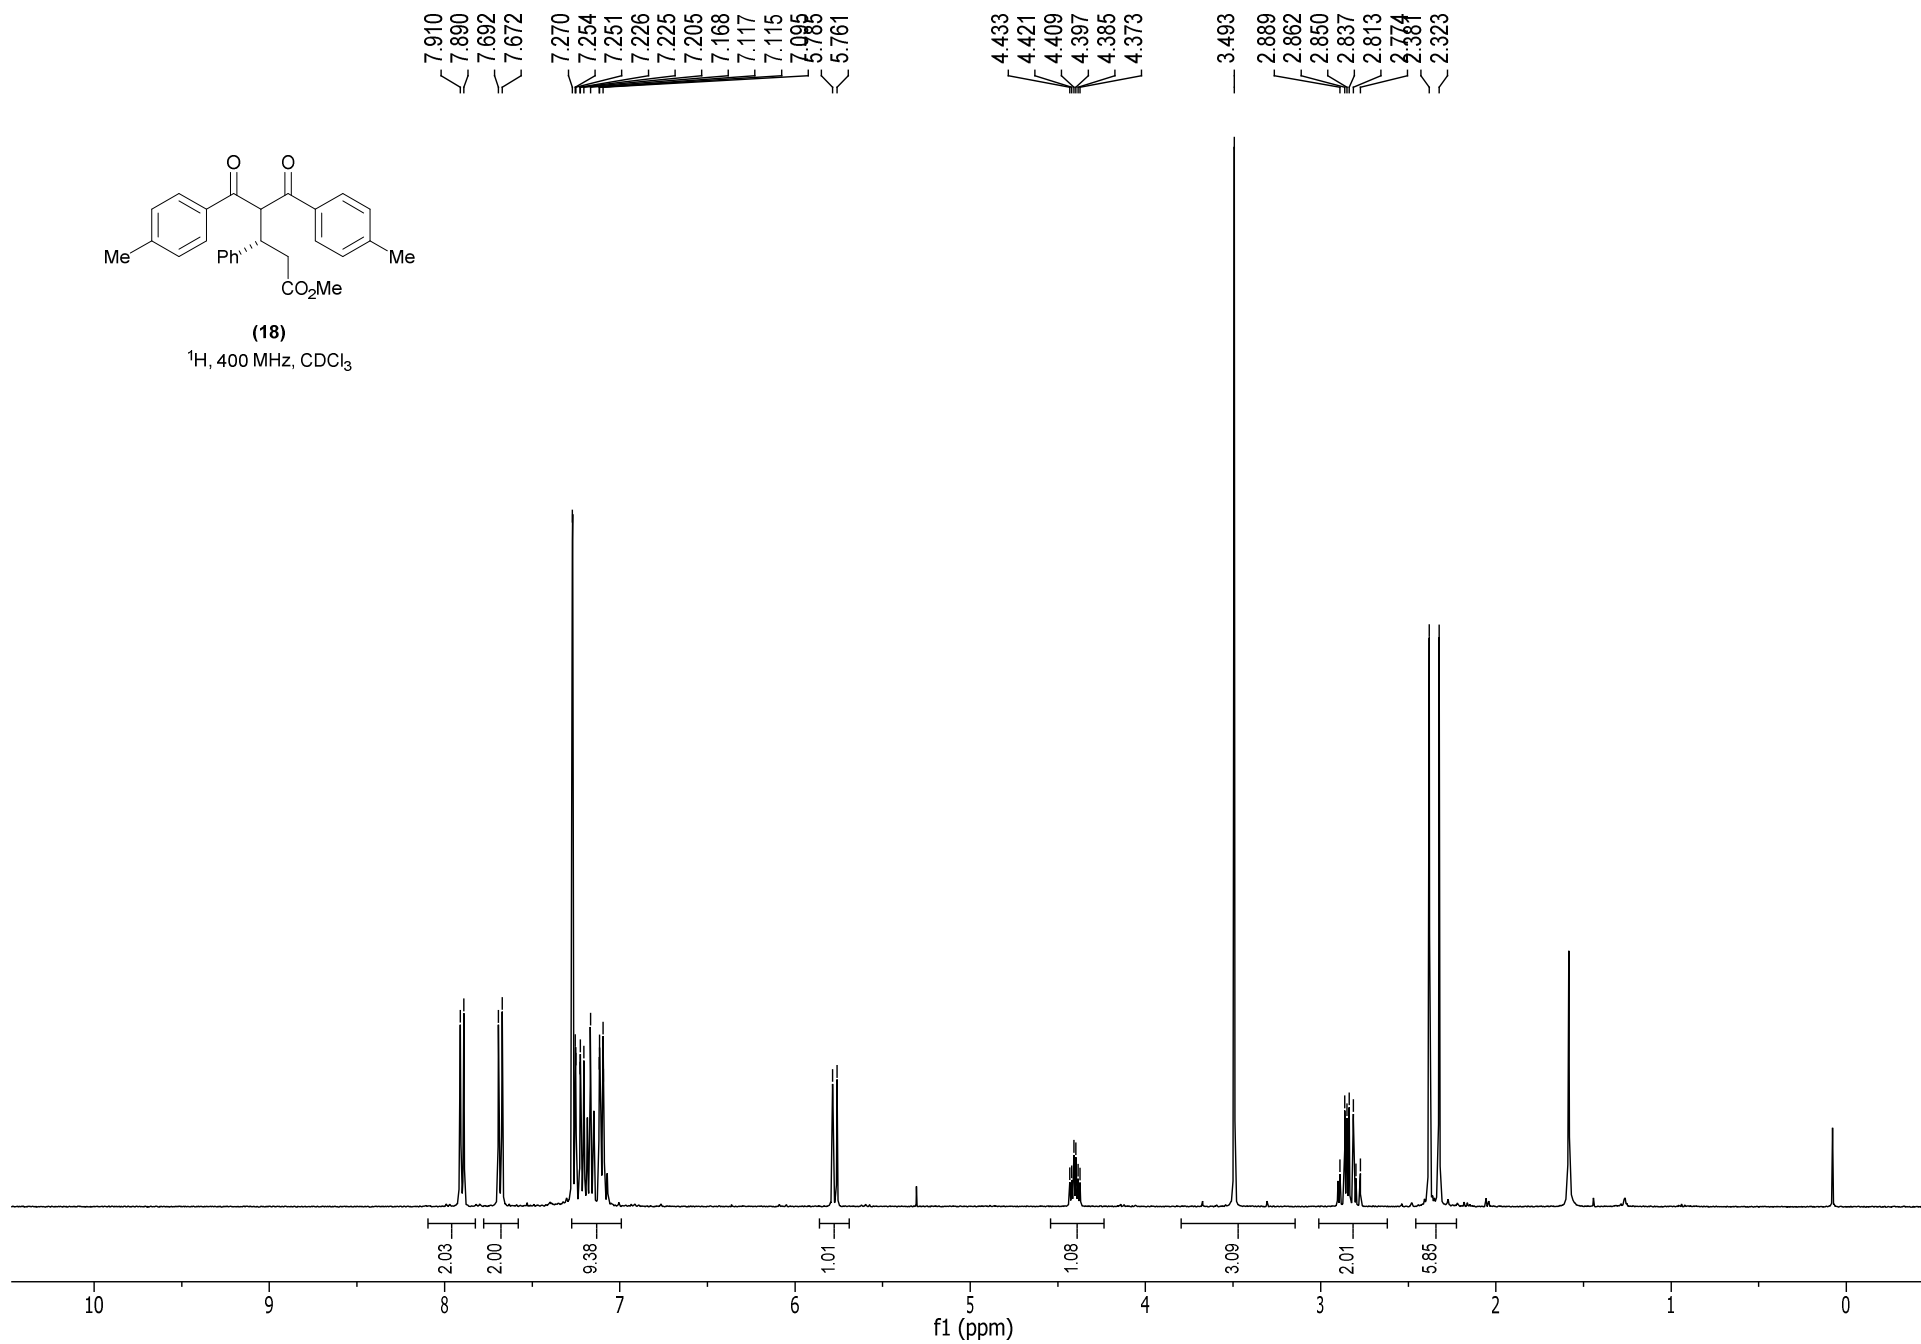

Supporting Information

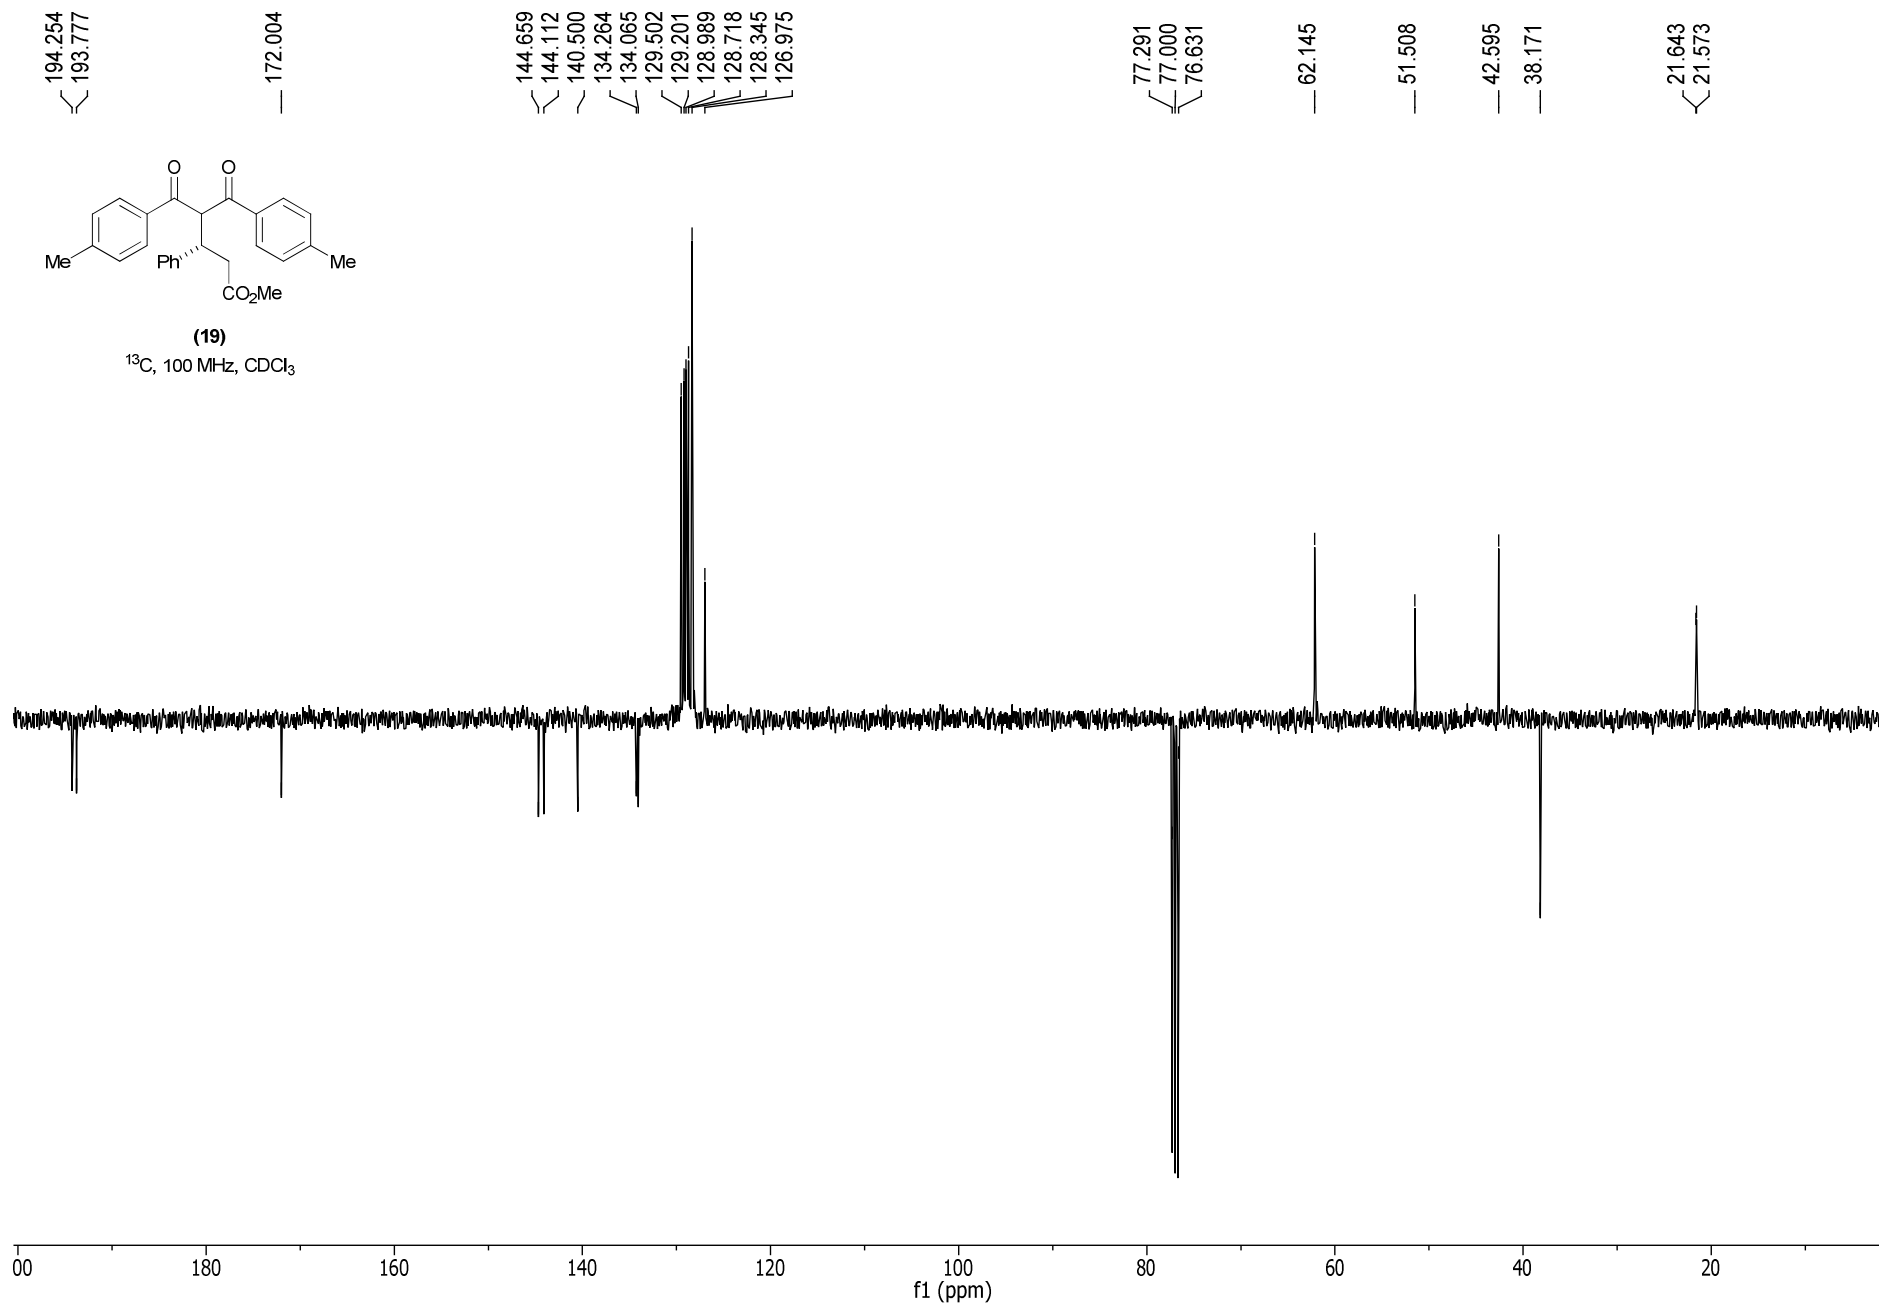

Supporting Information

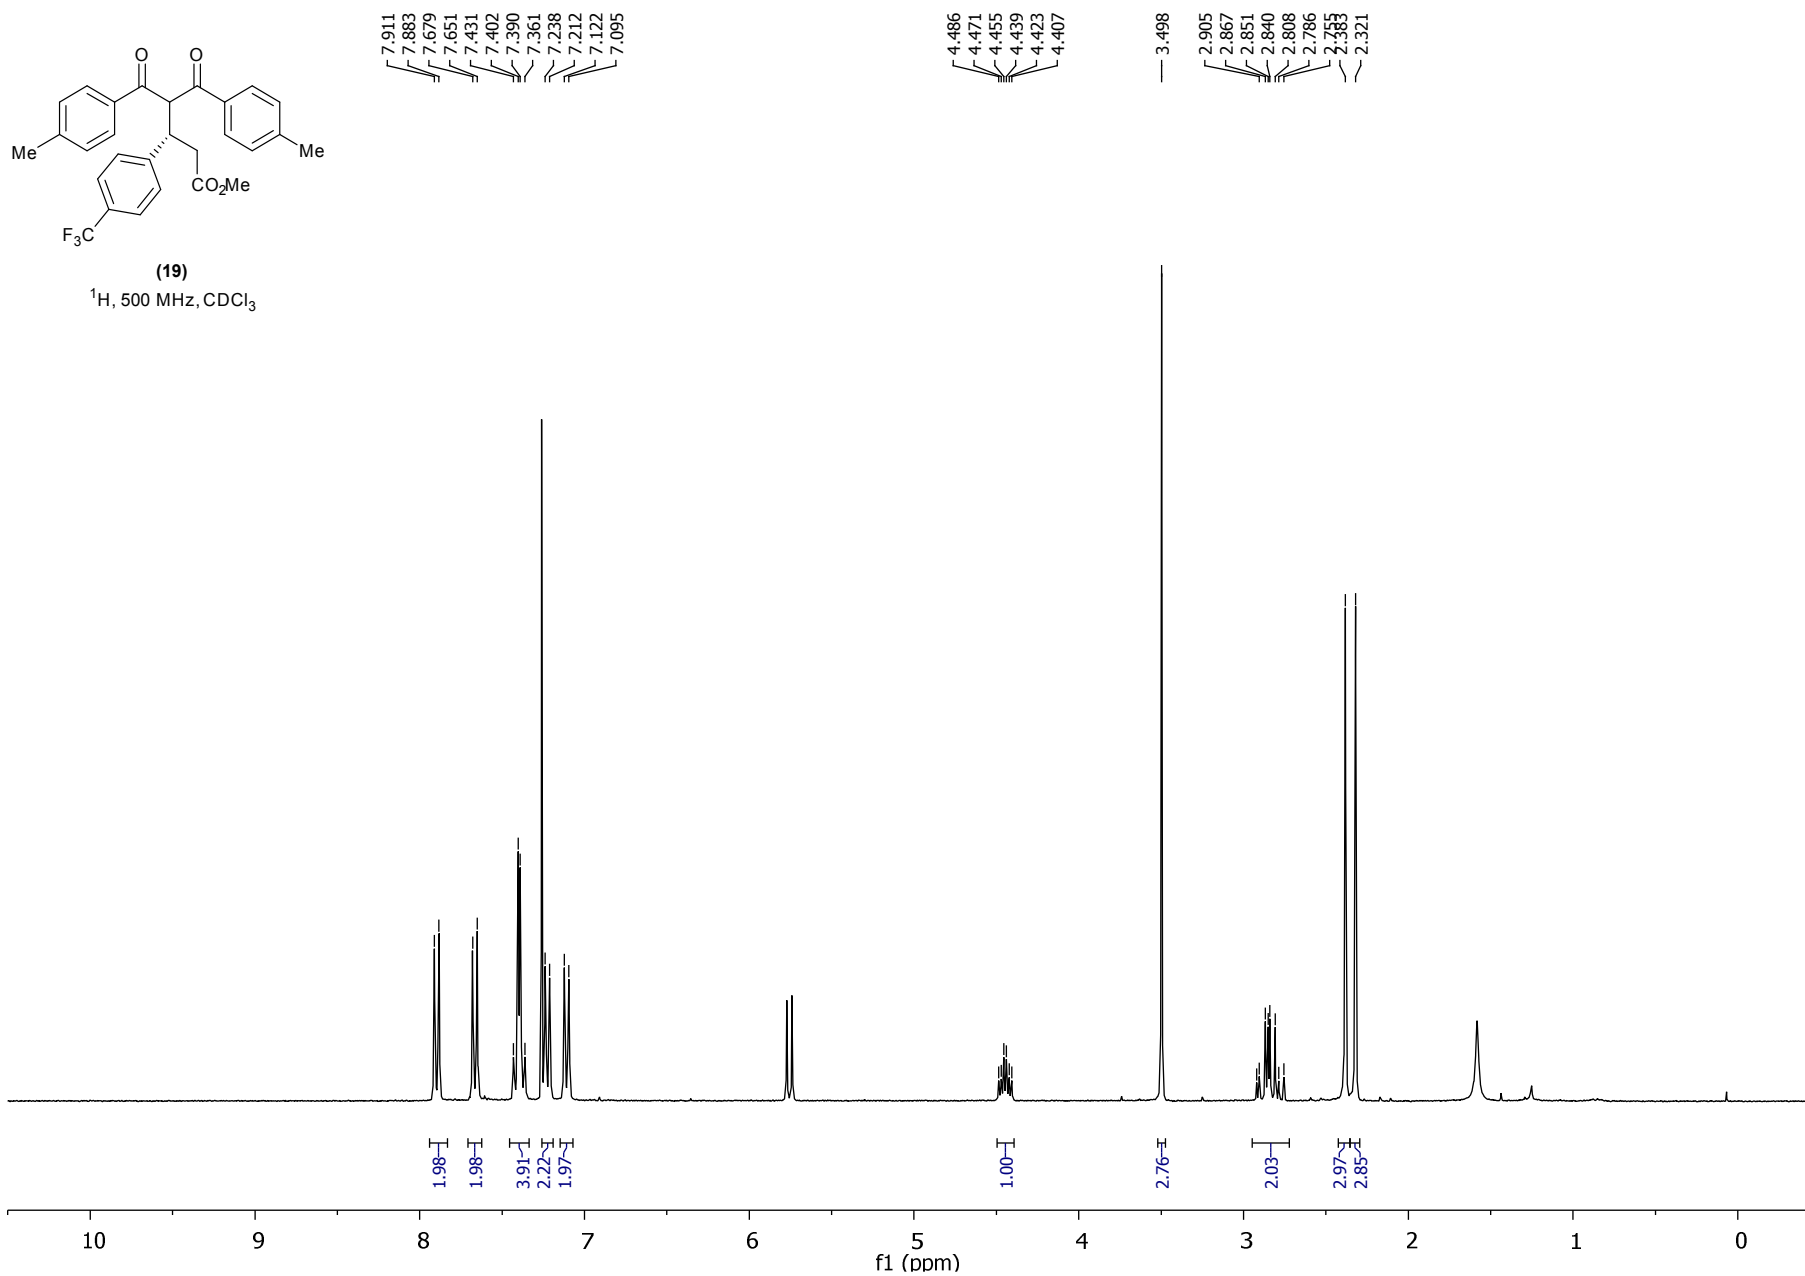

Supporting Information

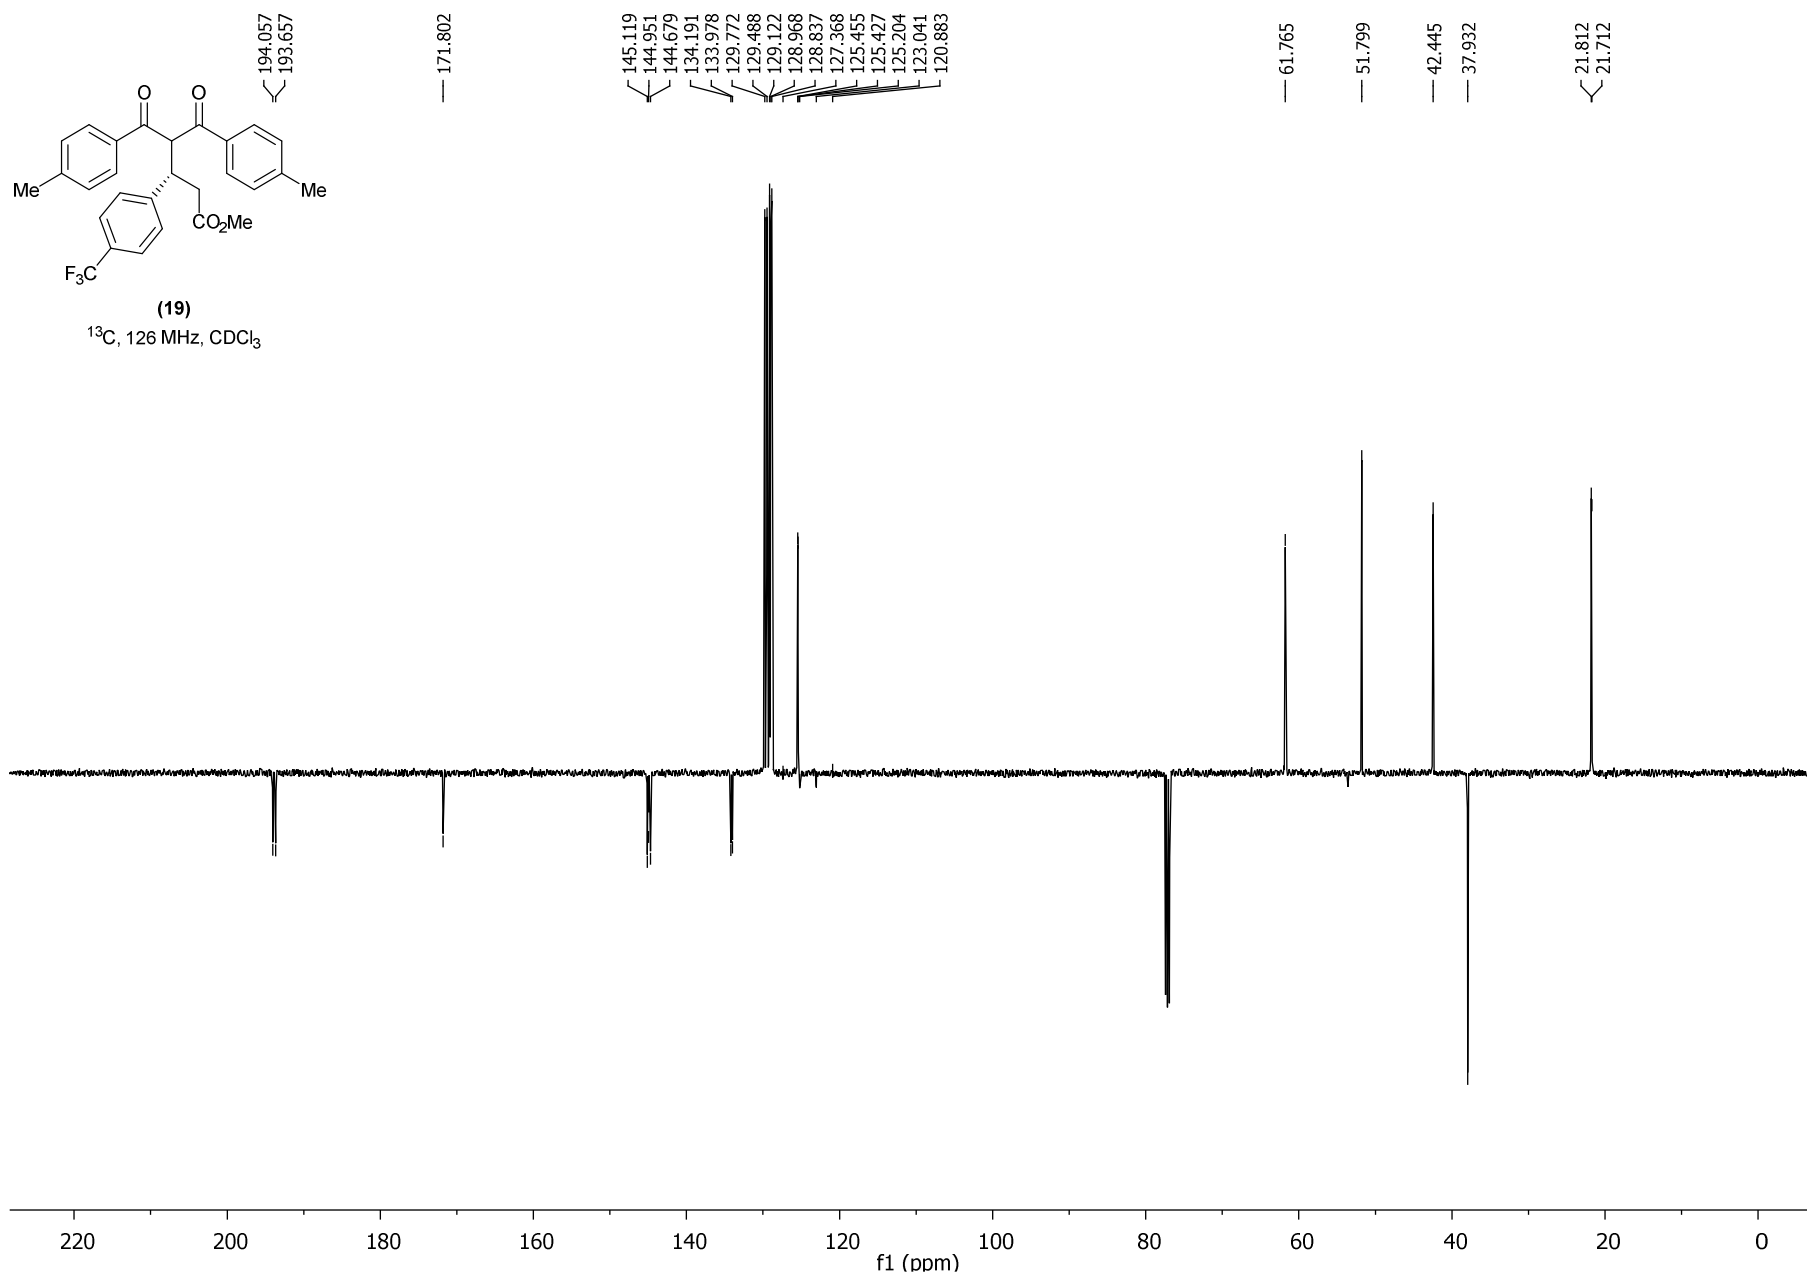



Supporting Information

7.599  
7.596  
7.593  
7.590  
7.504  
7.502  
7.498  
7.496  
7.377  
7.375  
7.365  
7.362  
7.275  
7.270  
7.258  
7.252  
7.249  
7.180  
7.177  
7.153  
7.135  
7.132  
7.123  
7.120

6.556  
6.550  
6.544  
6.538  
6.435  
6.429  
6.423  
5.509  
5.474

4.387  
4.369  
4.356  
4.352  
4.349  
4.339  
4.335  
4.322  
4.304

3.496

2.819  
2.808  
2.801  
2.777

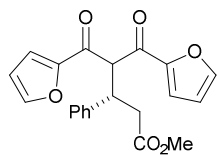

(20)

<sup>1</sup>H, 400 MHz, CDCl<sub>3</sub>

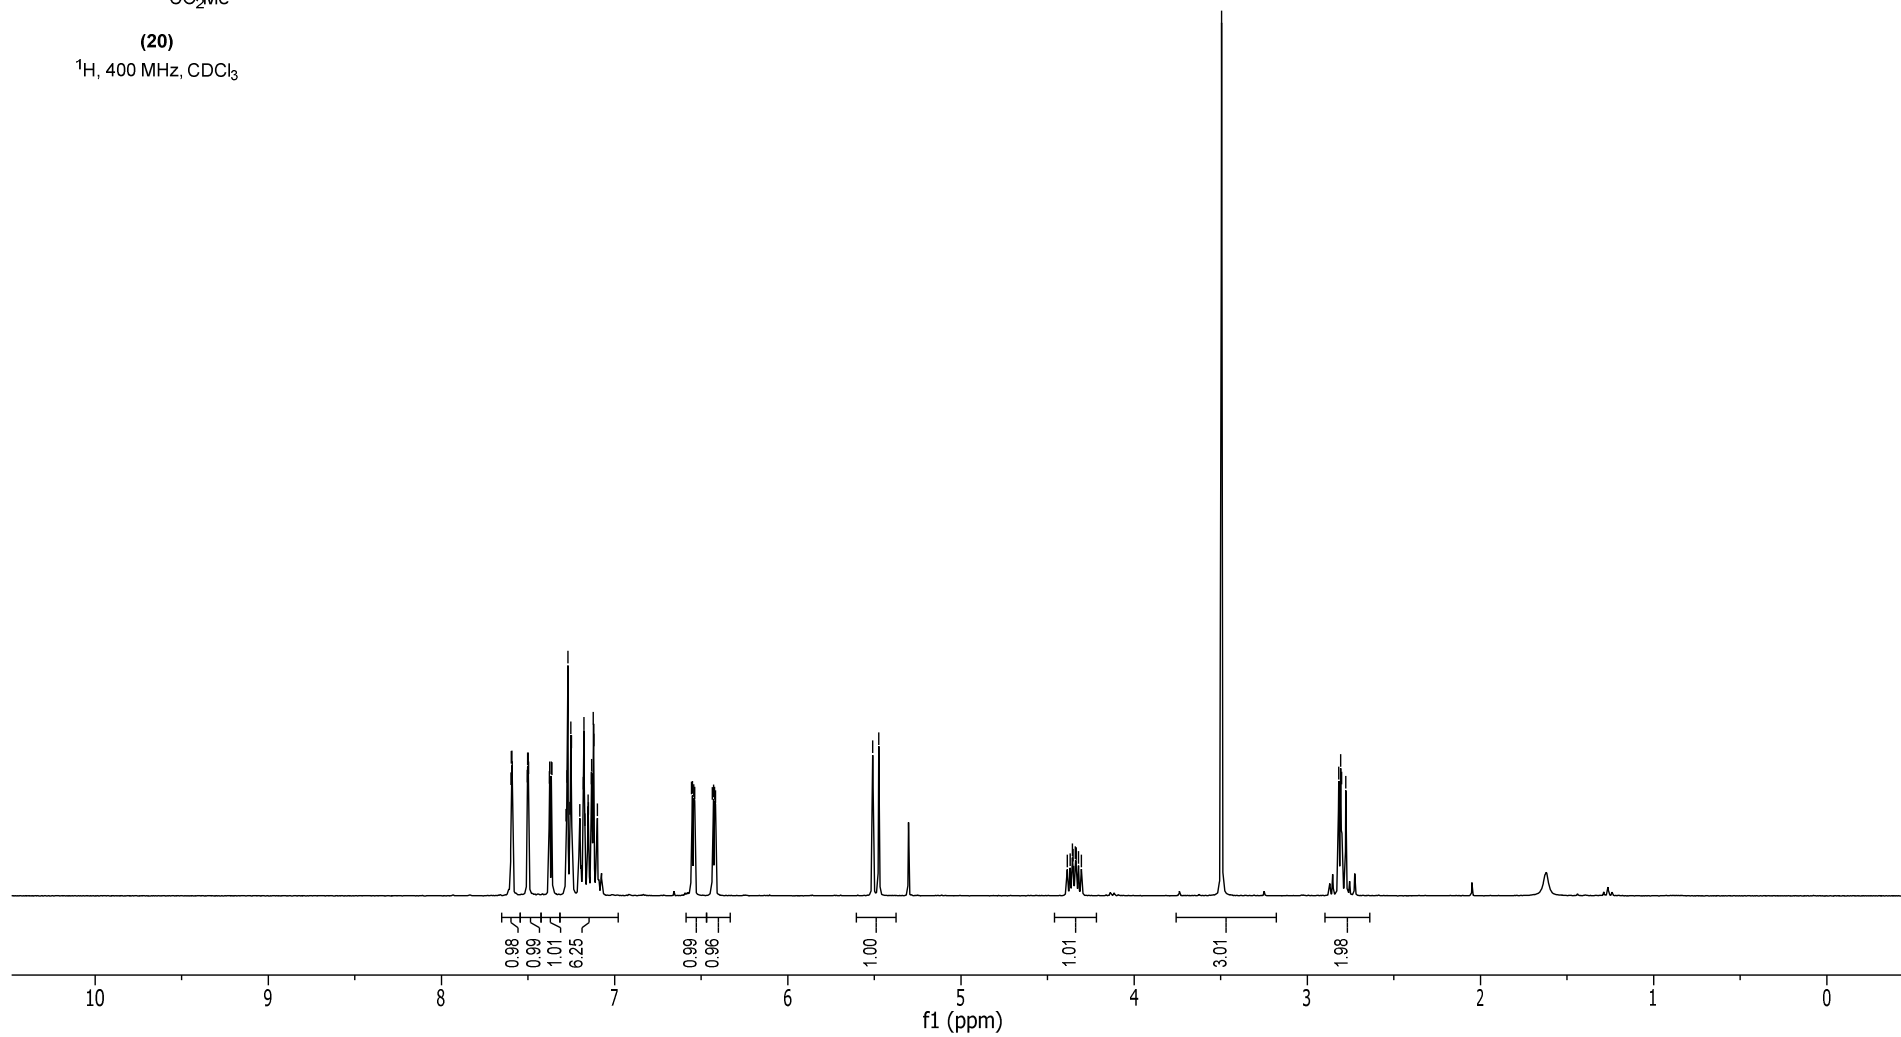

Supporting Information

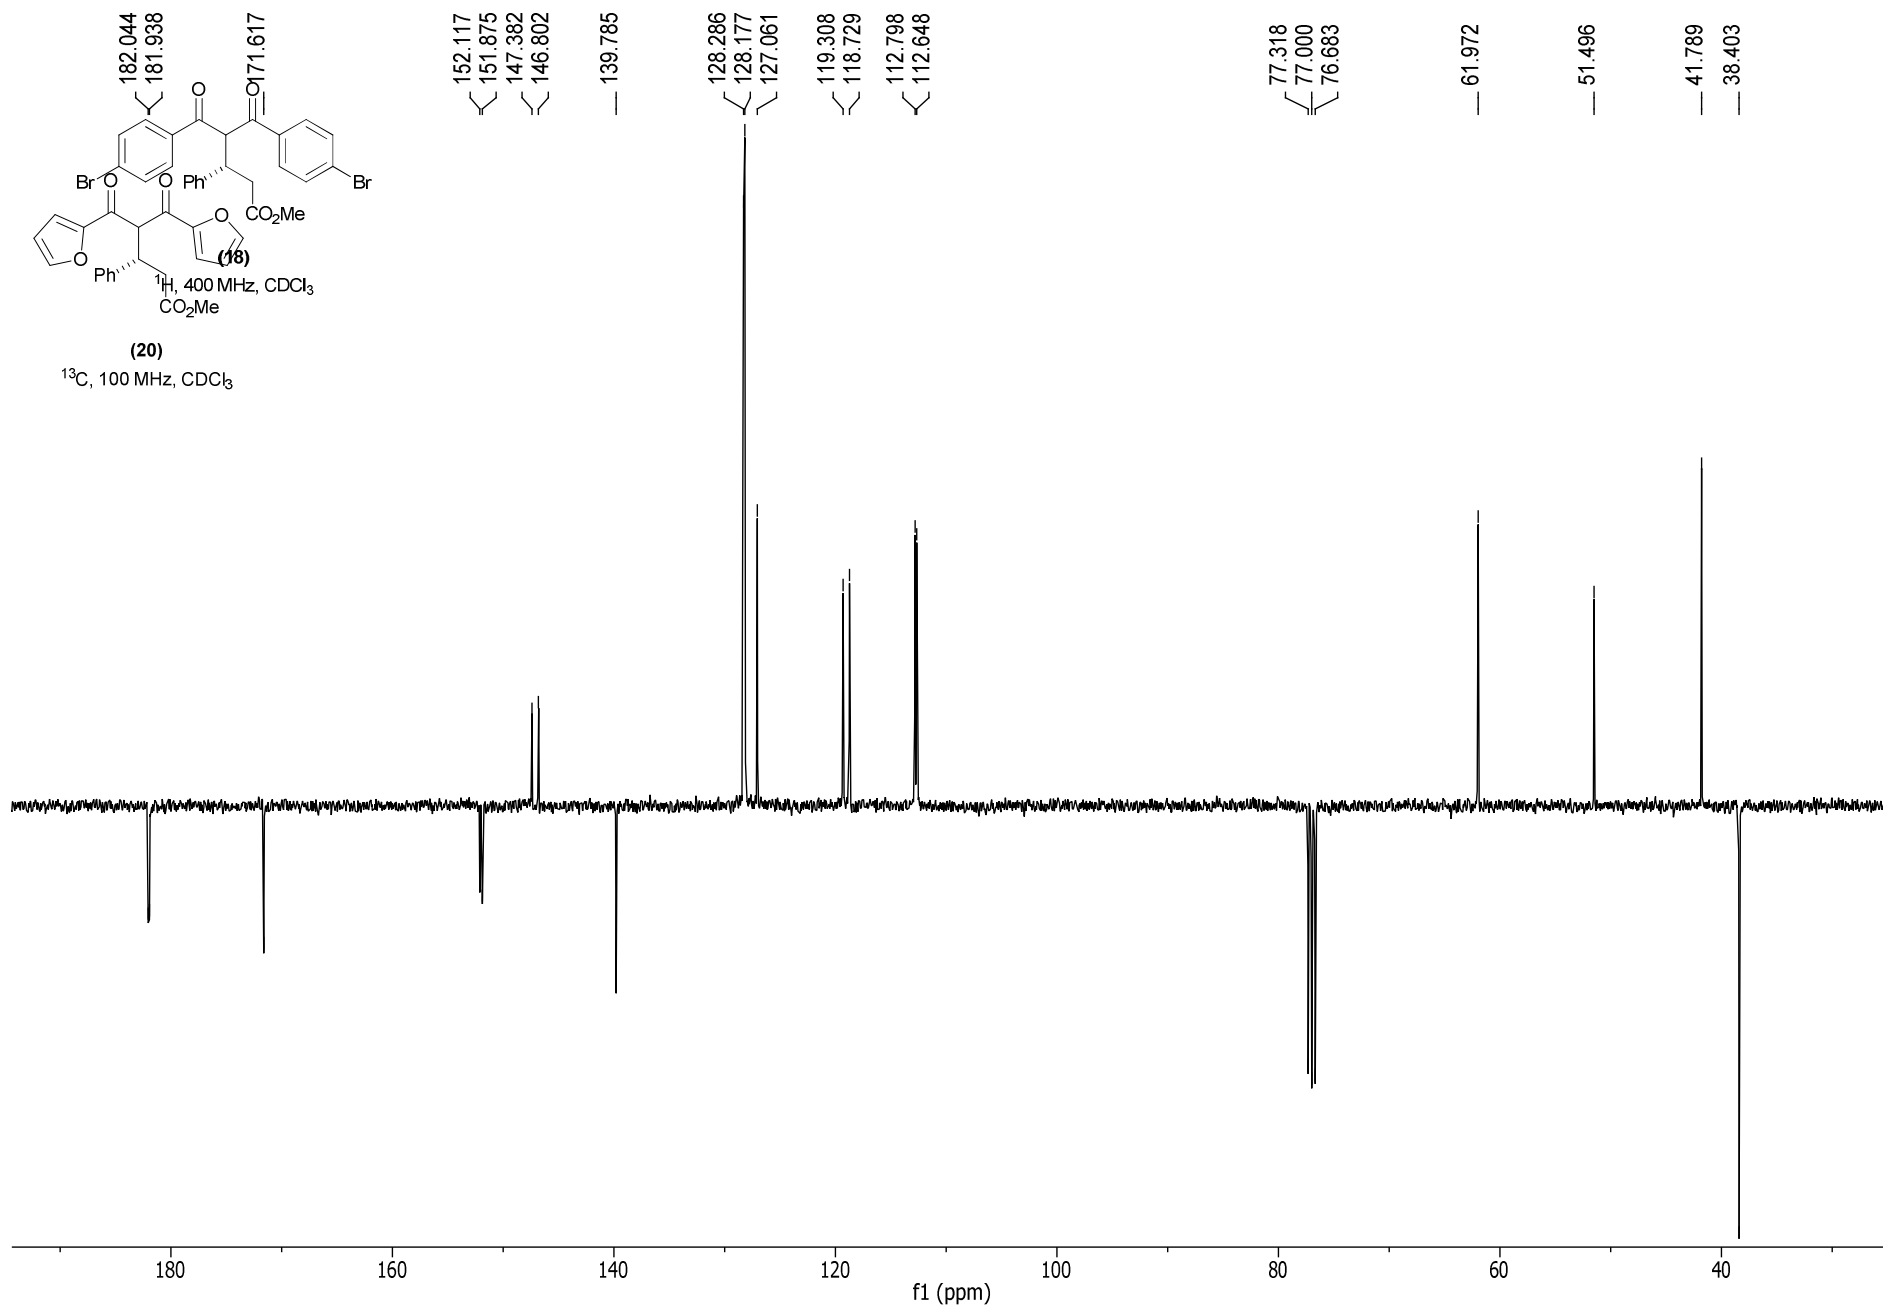

Supporting Information

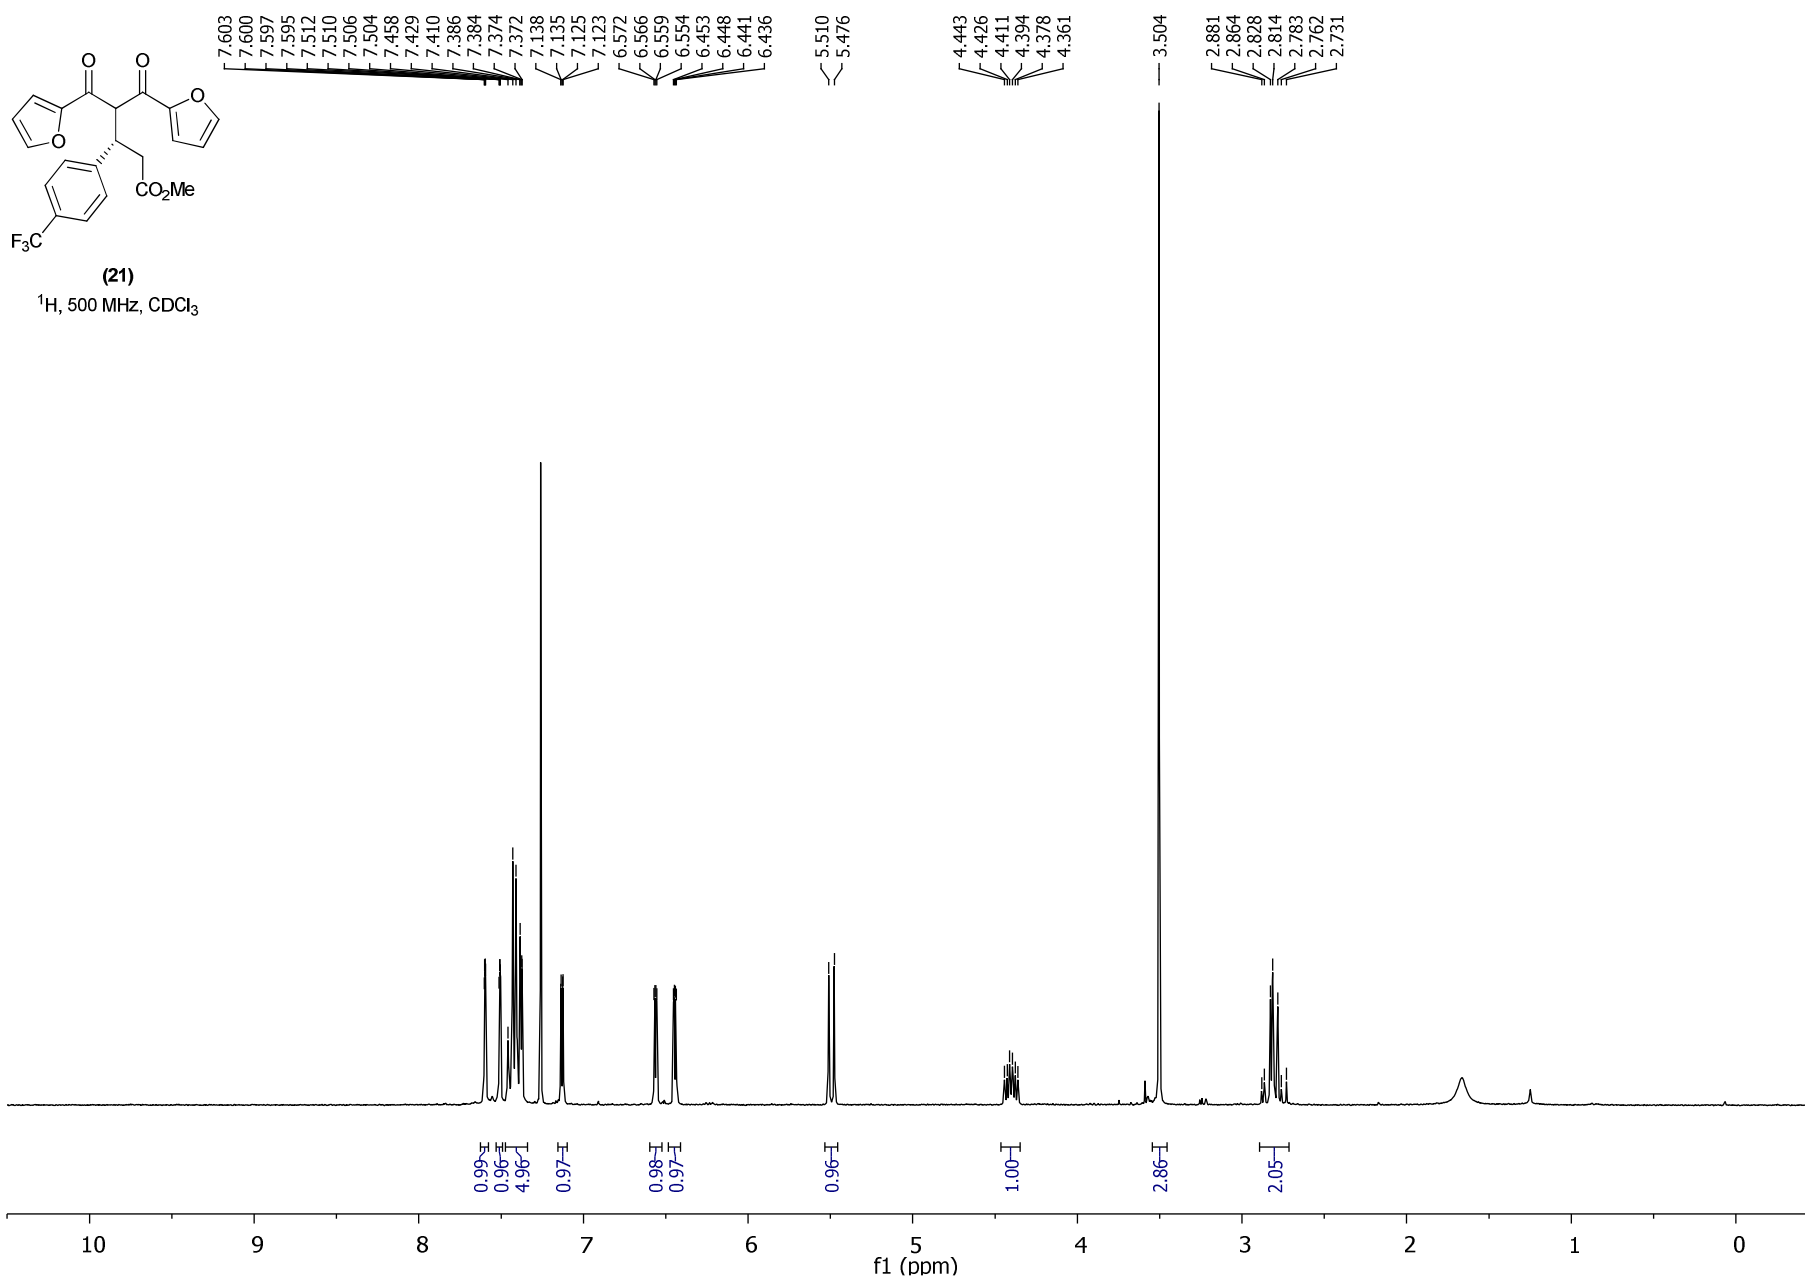

Supporting Information

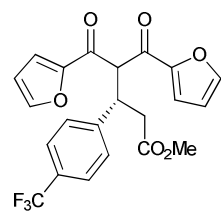

(21)

<sup>13</sup>C, 126 MHz, CDCl<sub>3</sub>

181.825  
181.766  
171.431  
152.178  
151.913  
147.663  
147.155  
144.341  
129.550  
129.292  
128.844  
125.429  
125.400  
125.179  
123.016  
119.579  
113.115  
113.012  
61.627  
51.806  
41.580  
38.102

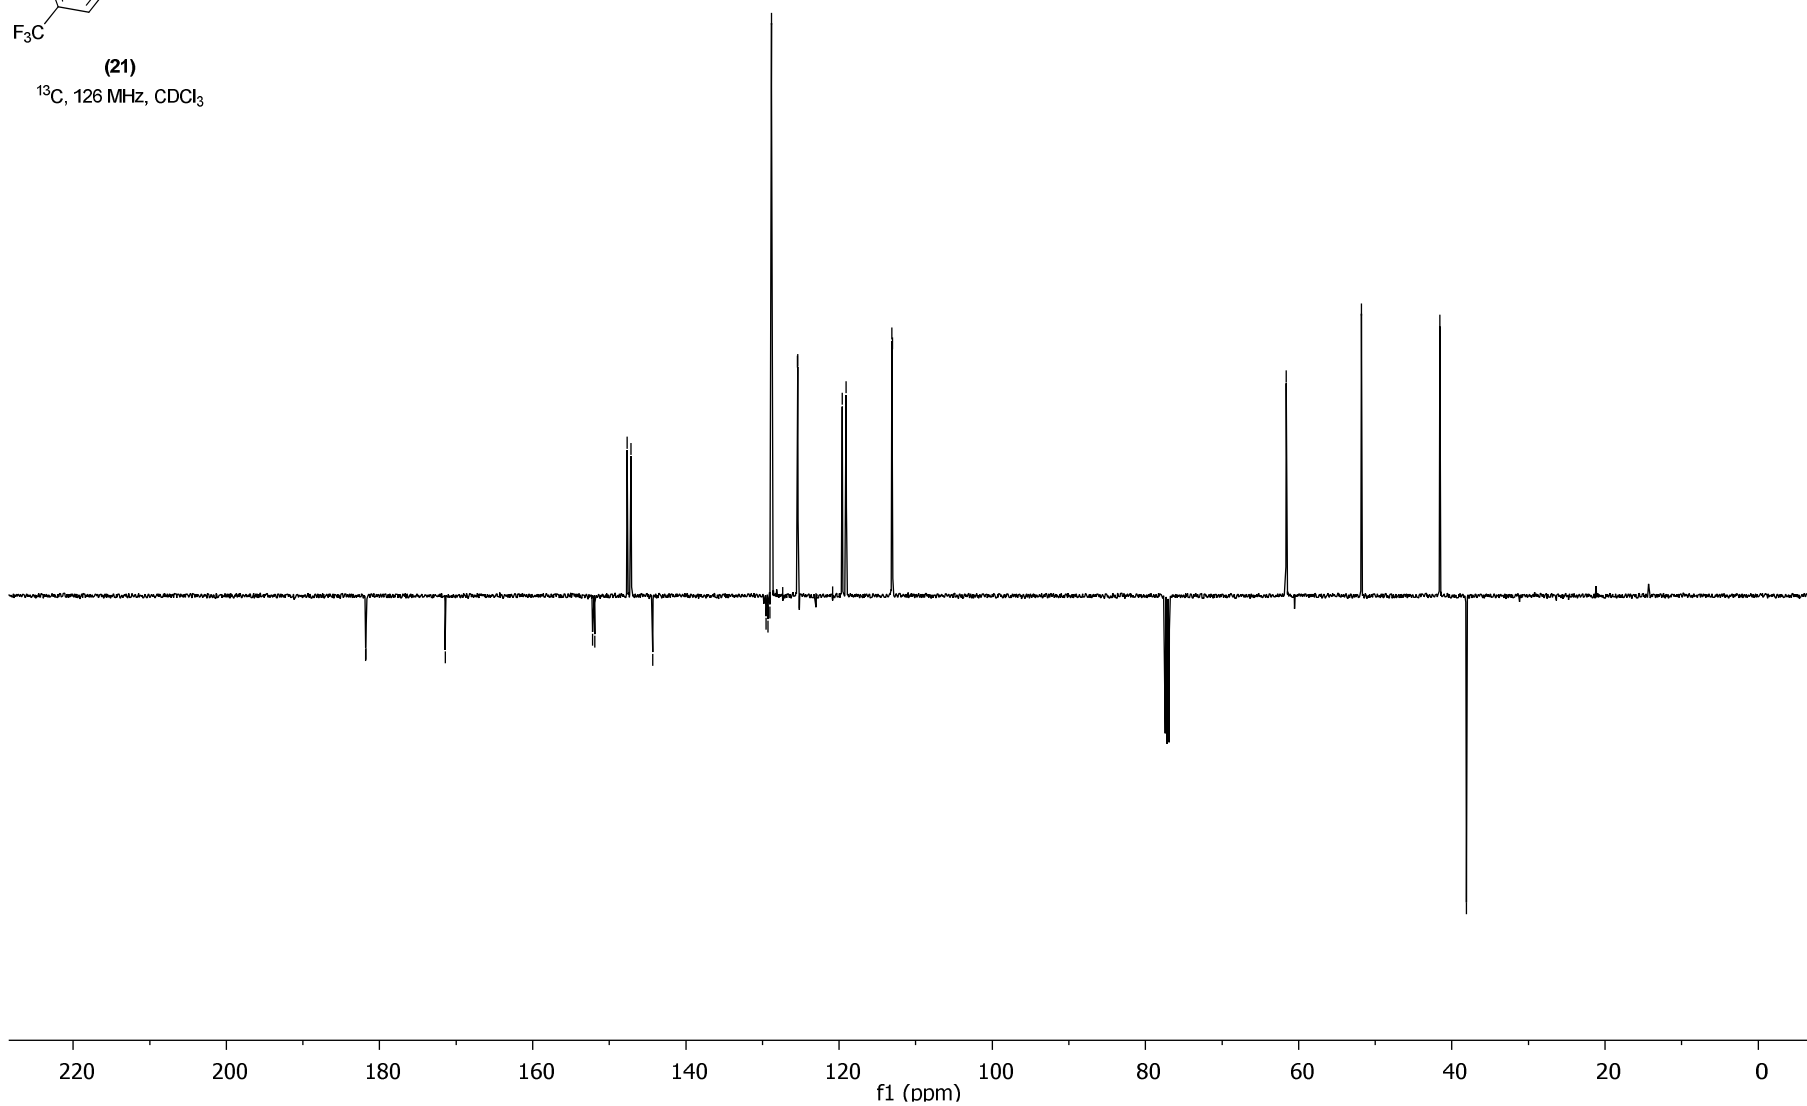

Supporting Information

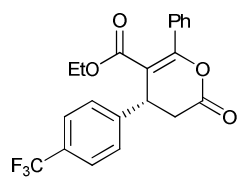

(28)

<sup>1</sup>H, 400 MHz, CDCl<sub>3</sub>

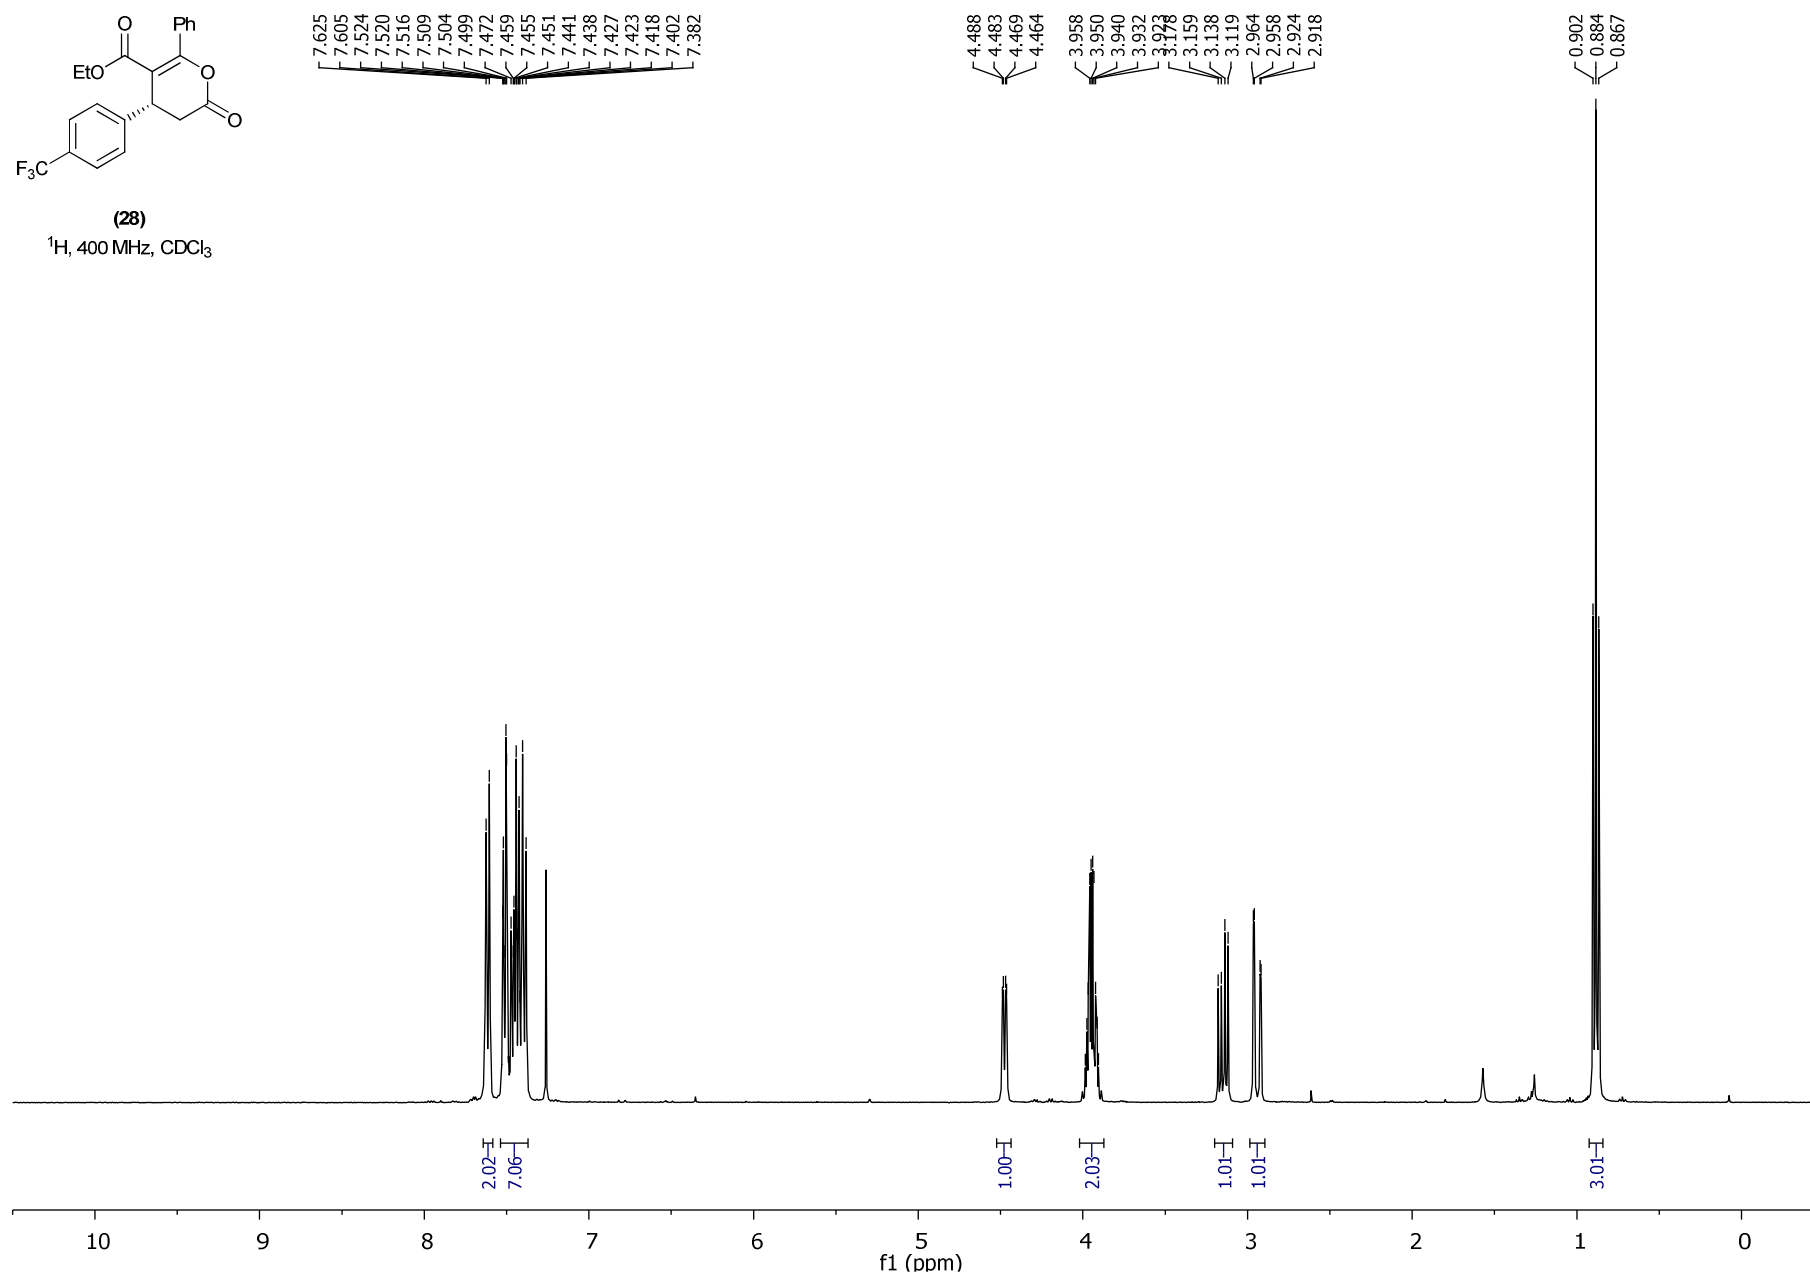

Supporting Information

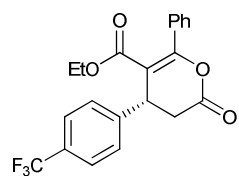

(28)

<sup>13</sup>C, 75 MHz, CDCl<sub>3</sub>

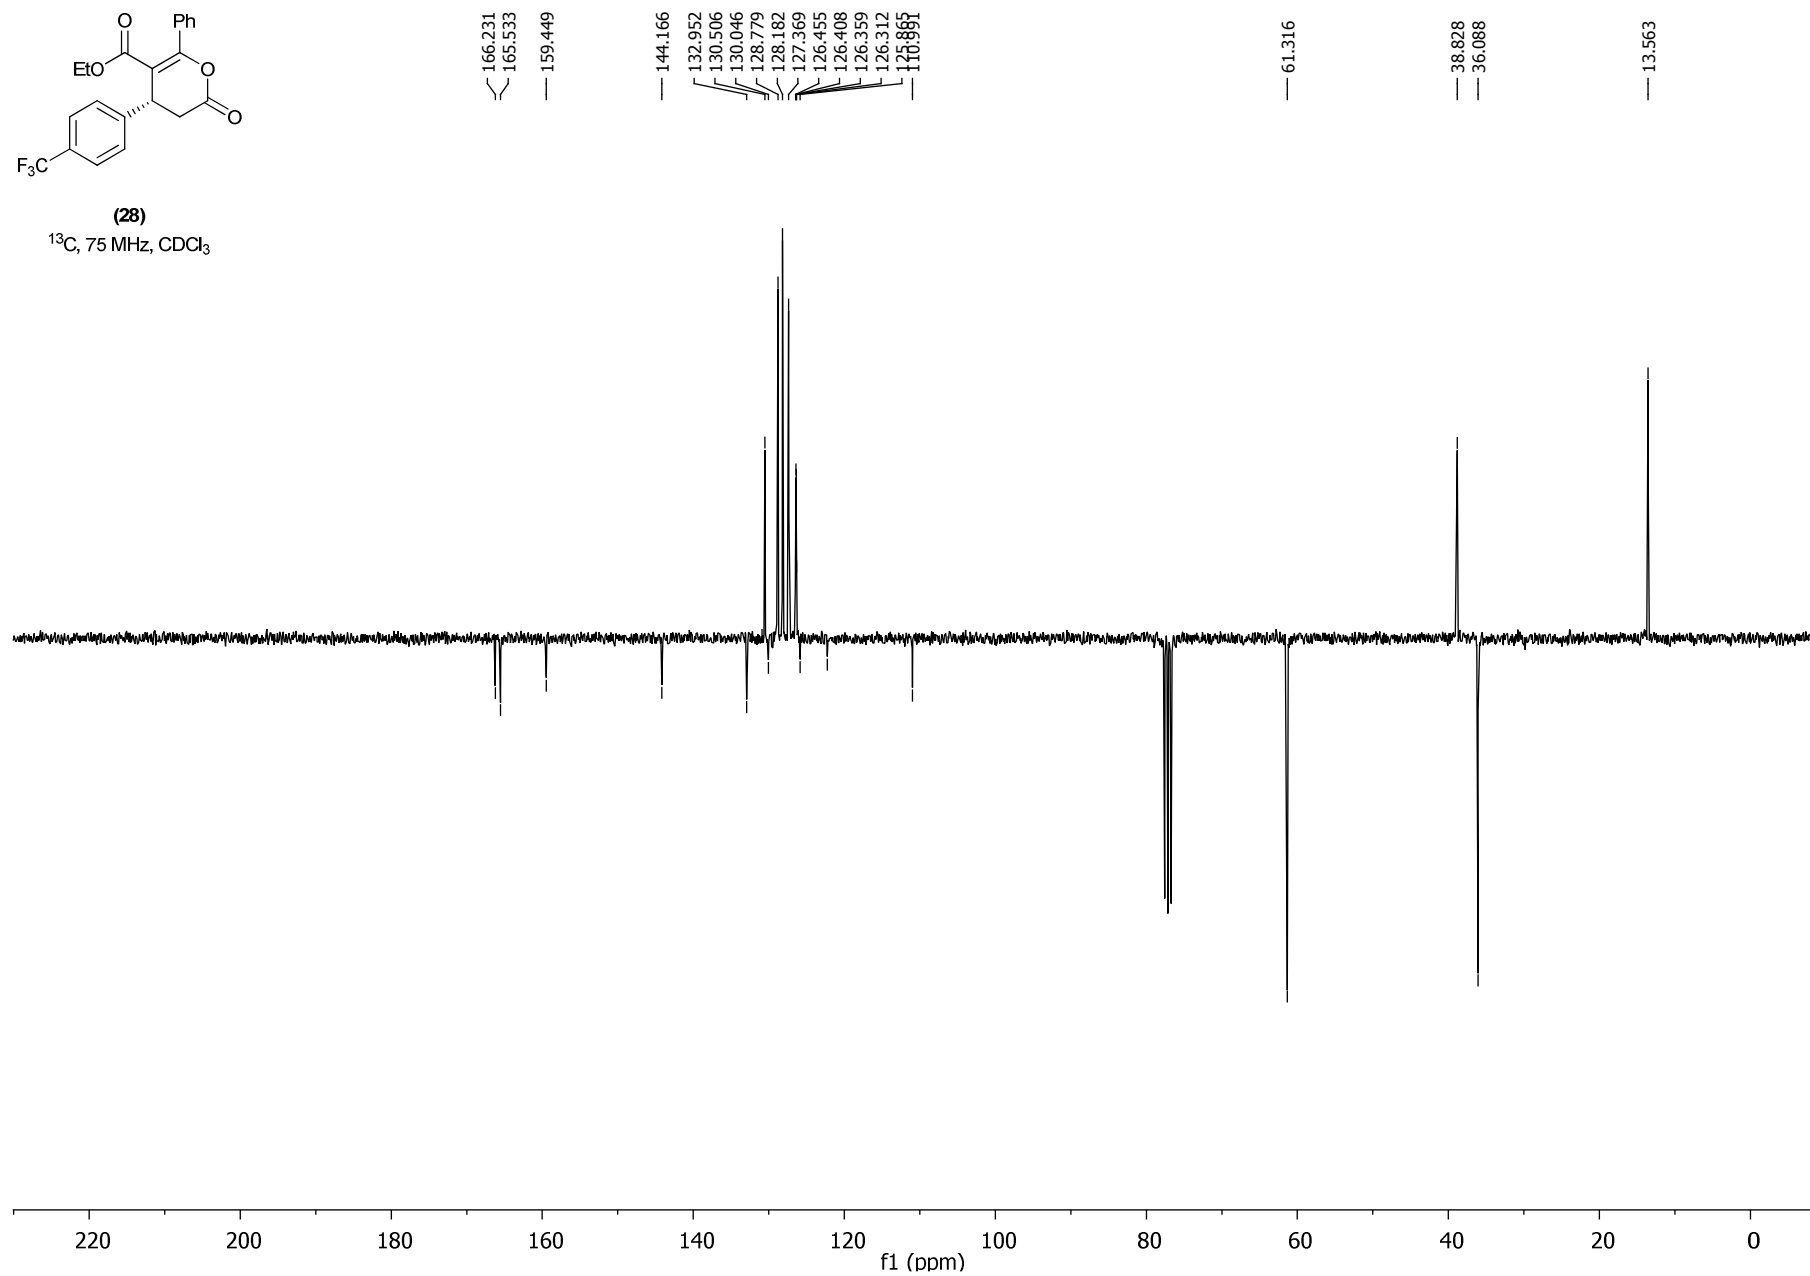

Supporting Information

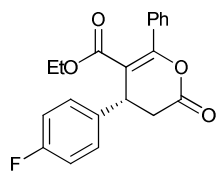

(29)

<sup>1</sup>H, 300 MHz, CDCl<sub>3</sub>

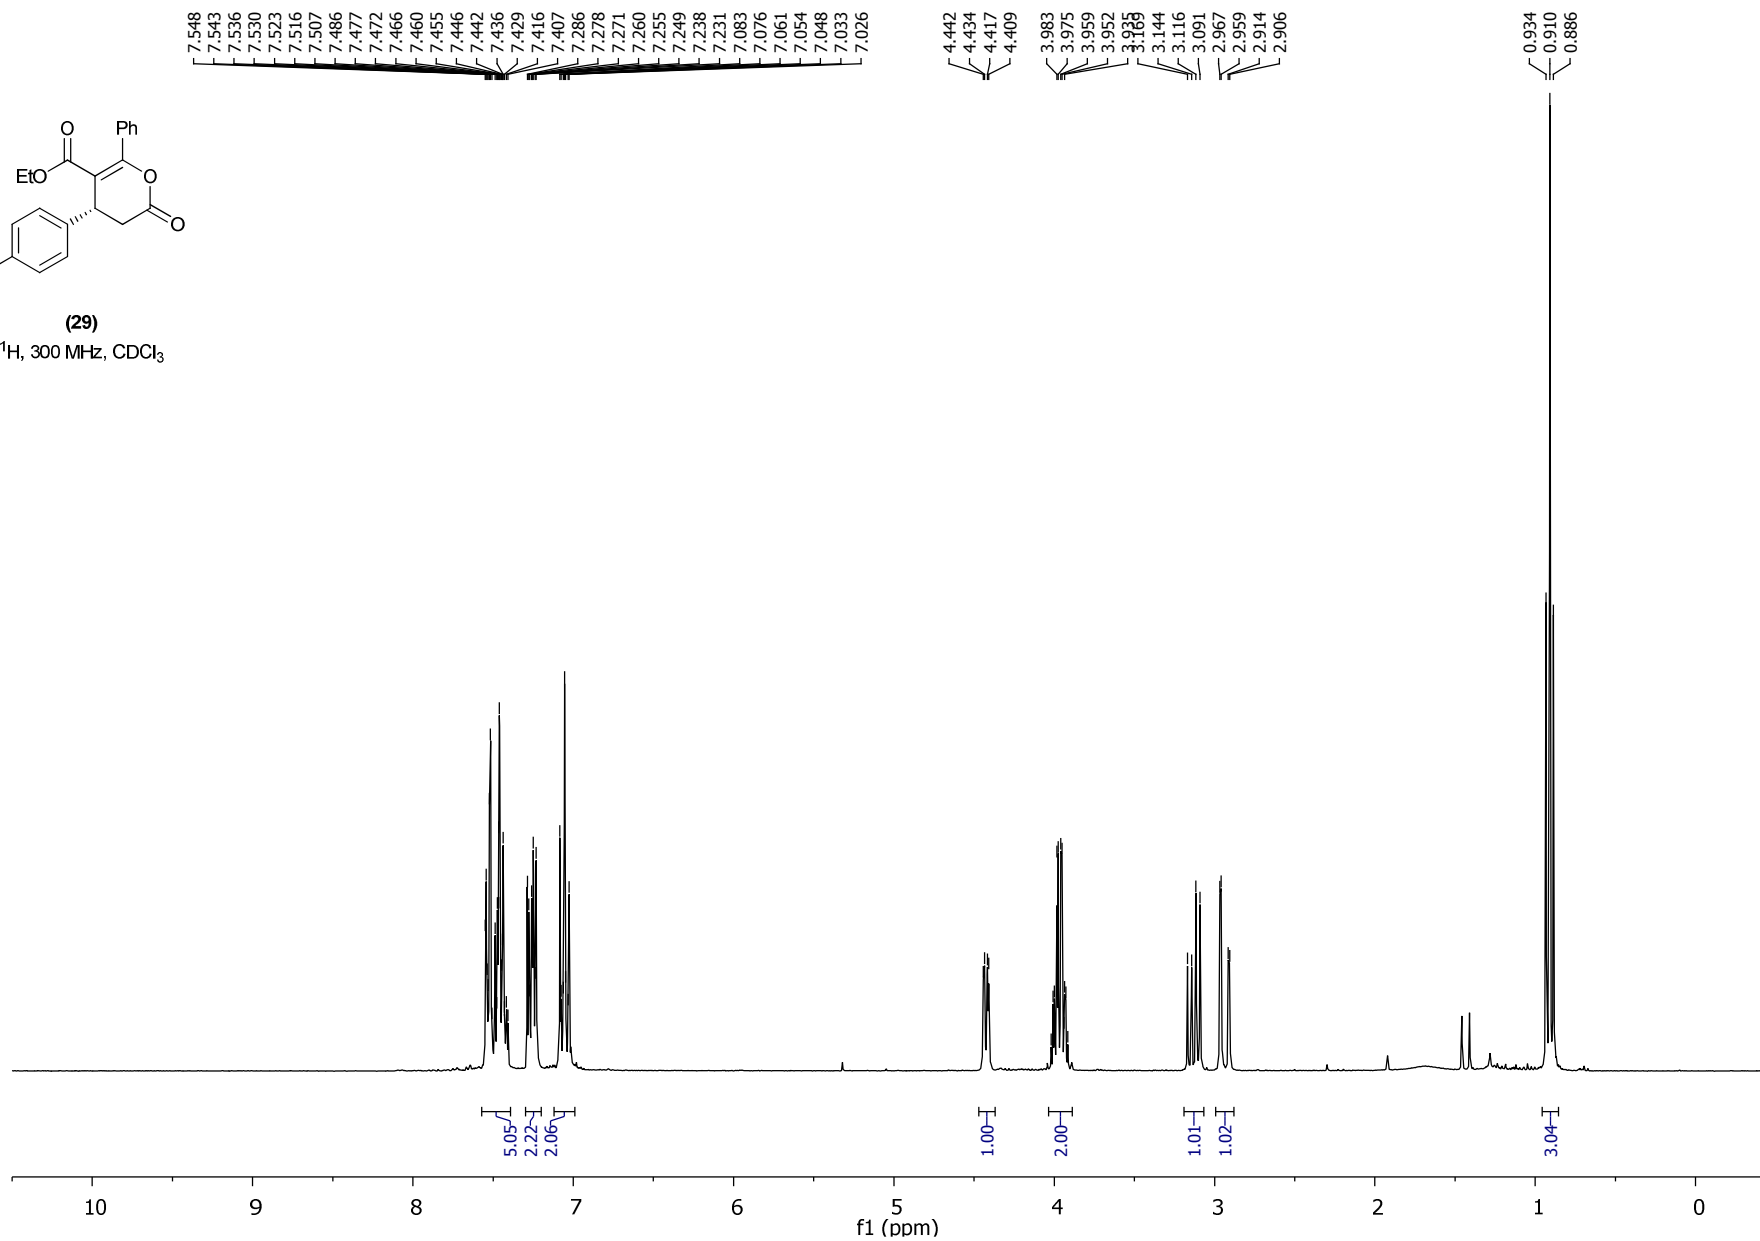

Supporting Information

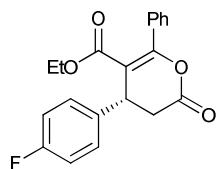

(29)

$^{13}\text{C}$ , 75 MHz,  $\text{CDCl}_3$

166.407  
165.934  
163.981  
160.714  
158.806

135.734  
133.045  
130.380  
128.745  
128.597  
128.488  
128.147

116.384  
116.098  
111.684

61.223

38.501  
36.498

13.585

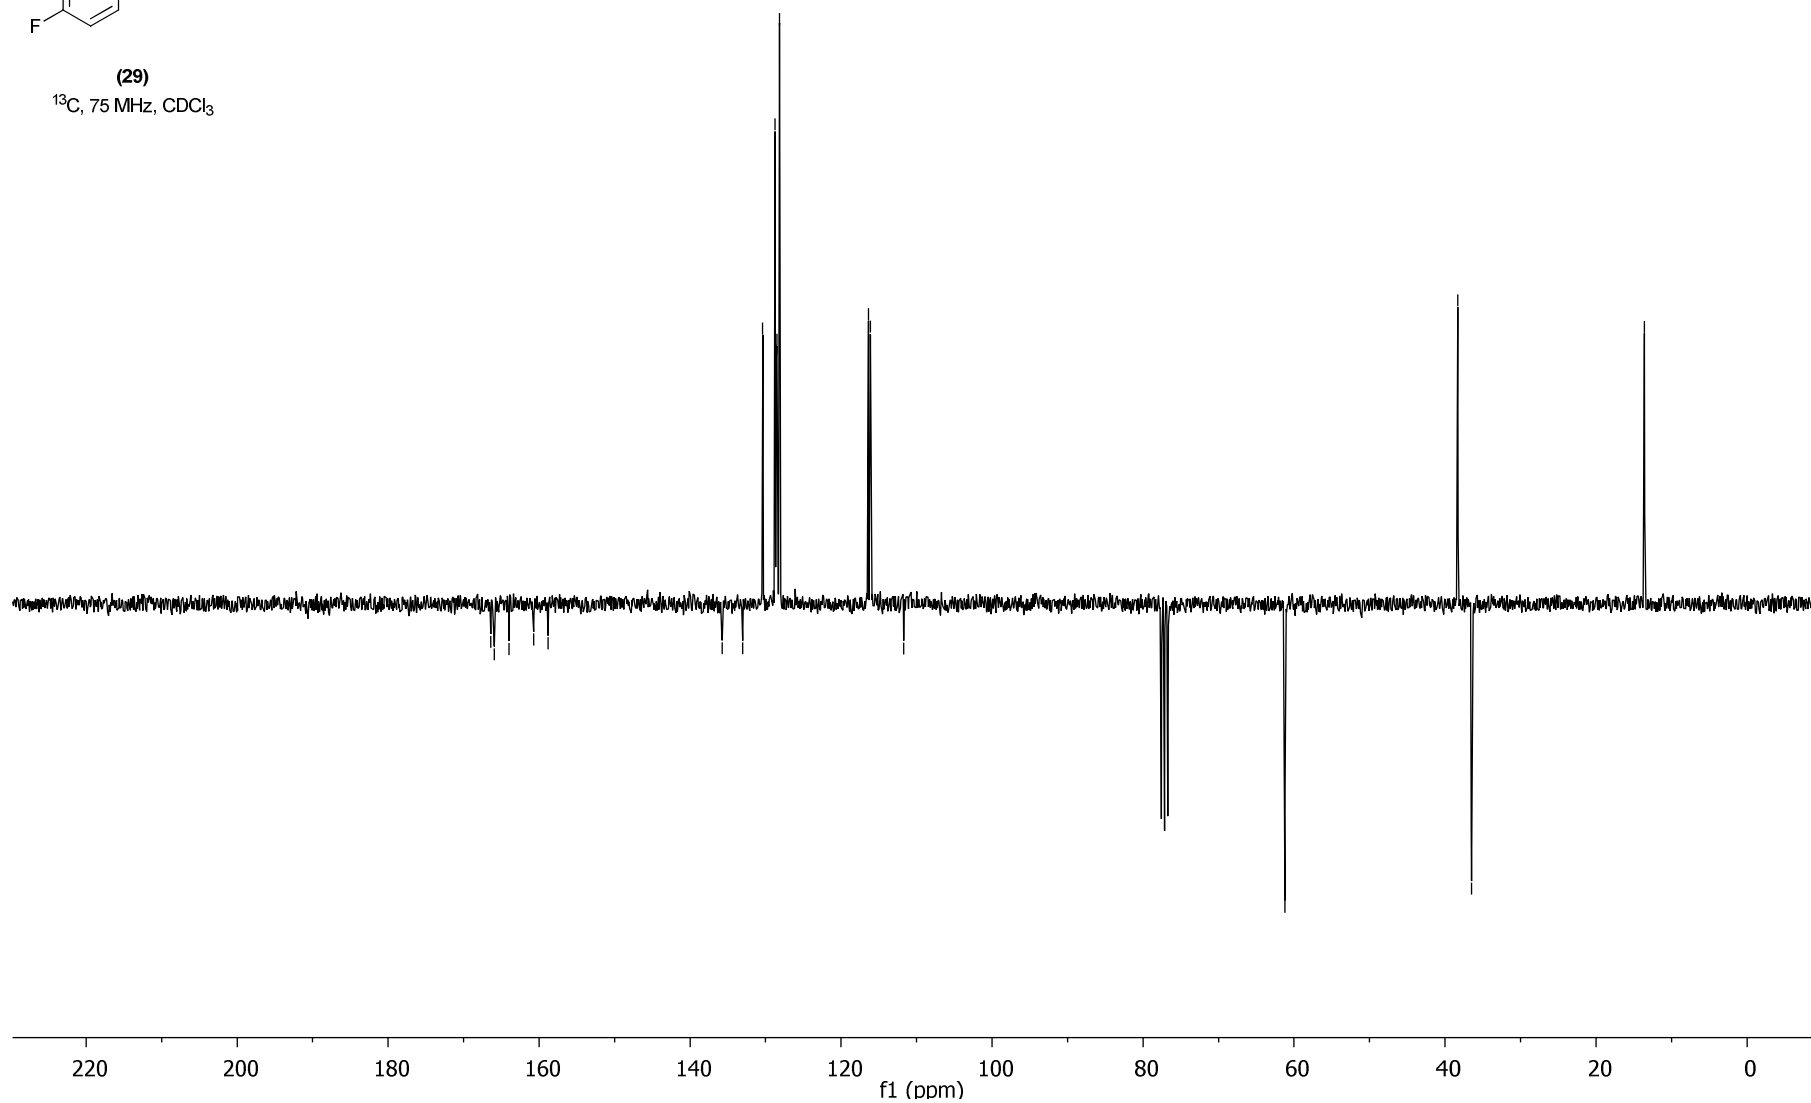



Supporting Information

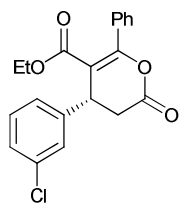

$^1\text{H}$ , 400 MHz,  $\text{CDCl}_3$

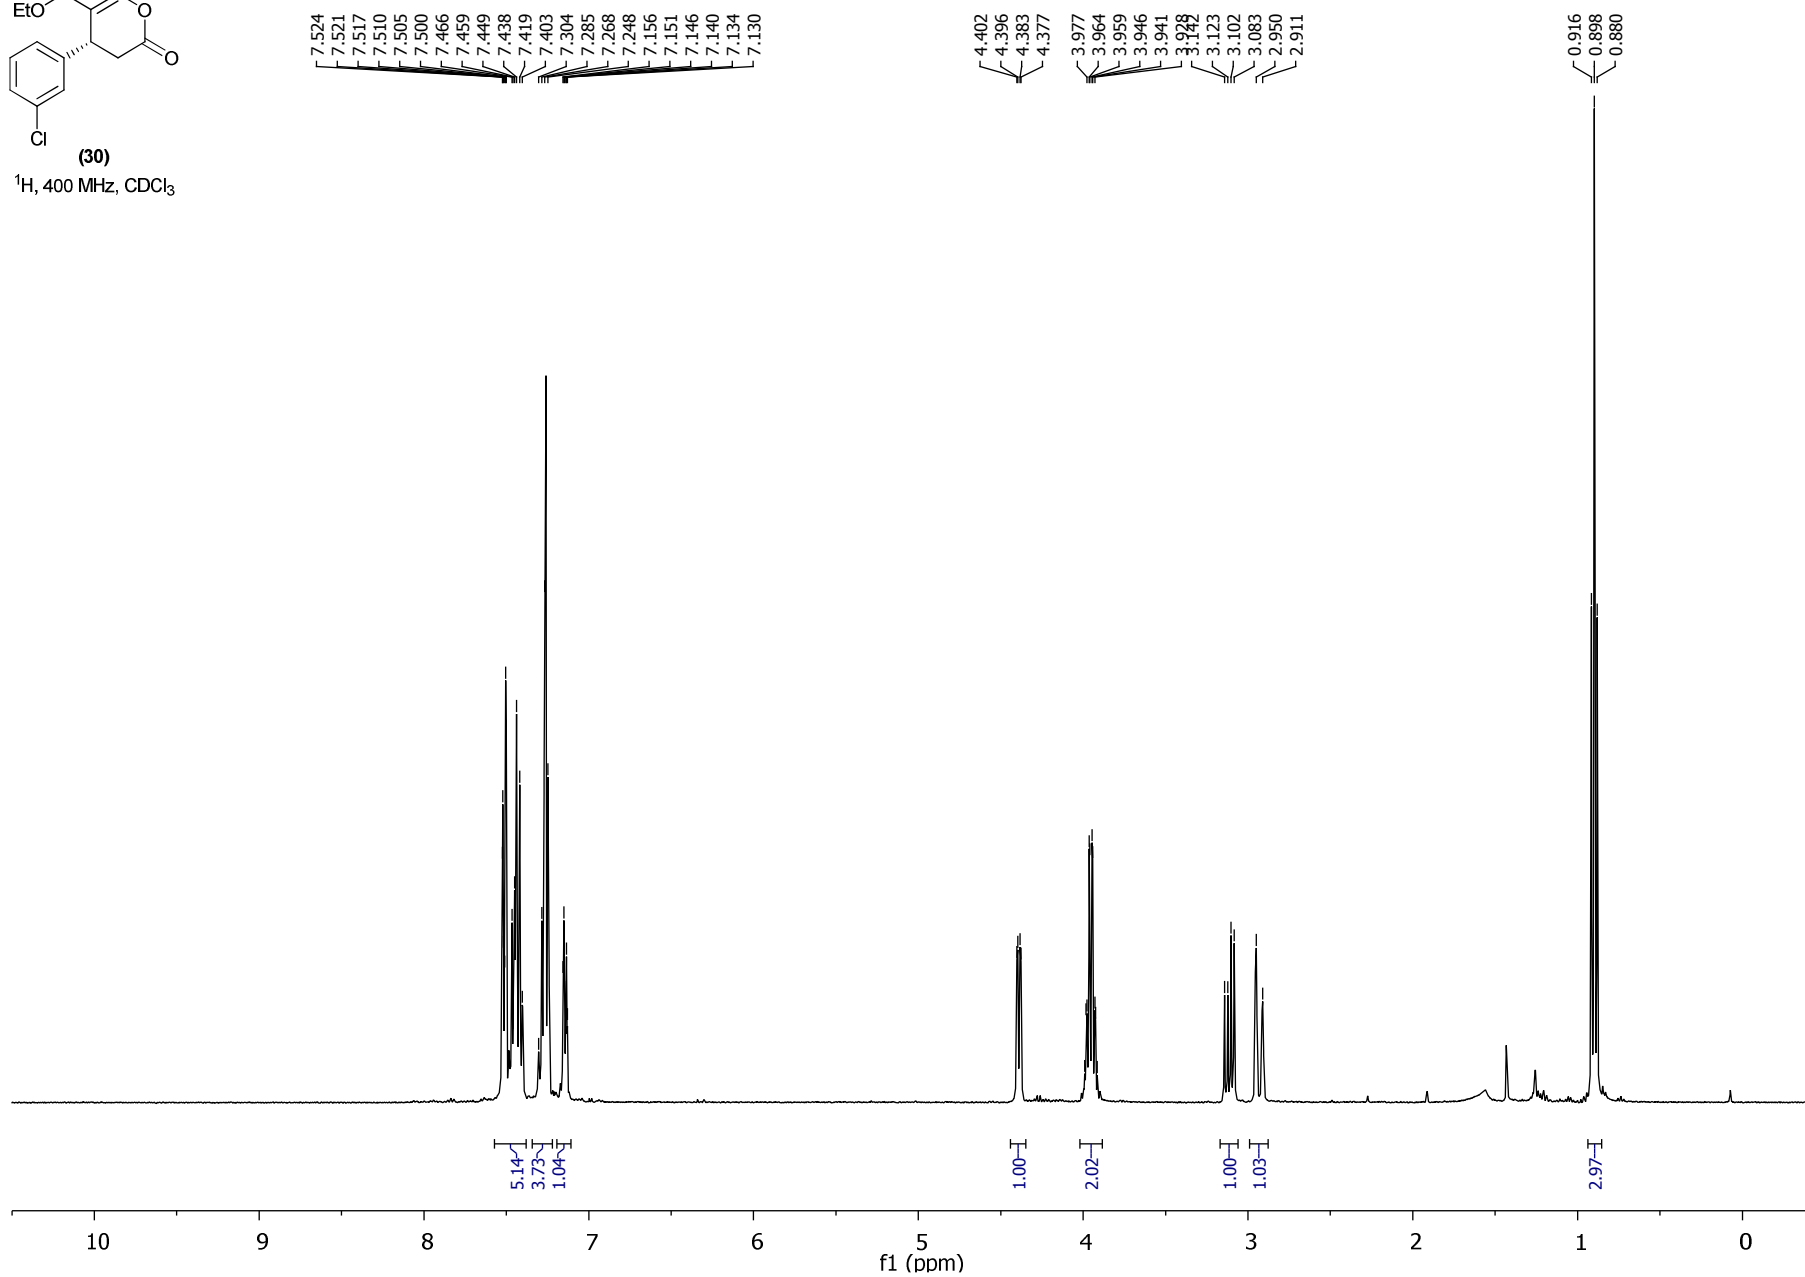

Supporting Information



<sup>13</sup>C, 75 MHz, CDCl<sub>3</sub>

166.251  
165.666  
— 159.248  
142.053  
135.090  
132.981  
130.668  
130.445  
128.789  
128.164  
127.314  
124.940  
— 111.061

— 61.286

— 38.672  
— 36.217

— 13.605

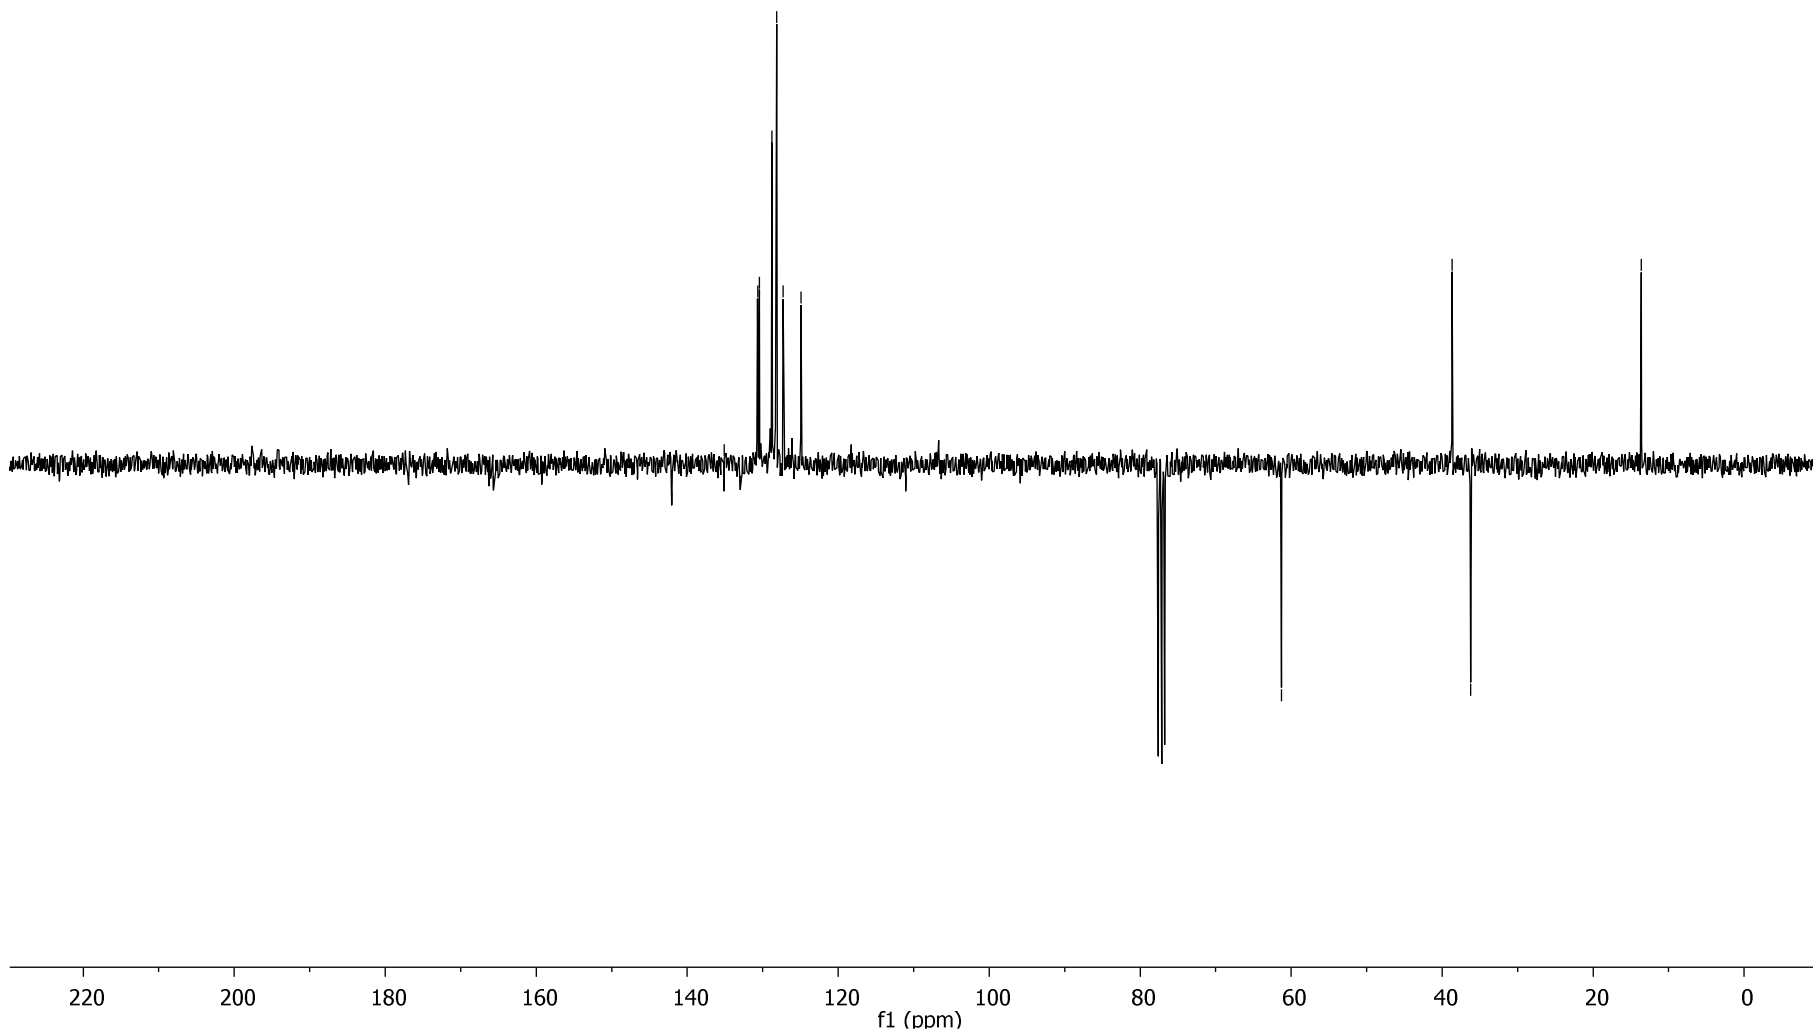

Supporting Information

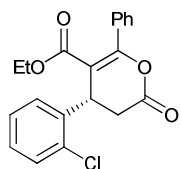

(31)

<sup>1</sup>H, 300 MHz, CDCl<sub>3</sub>

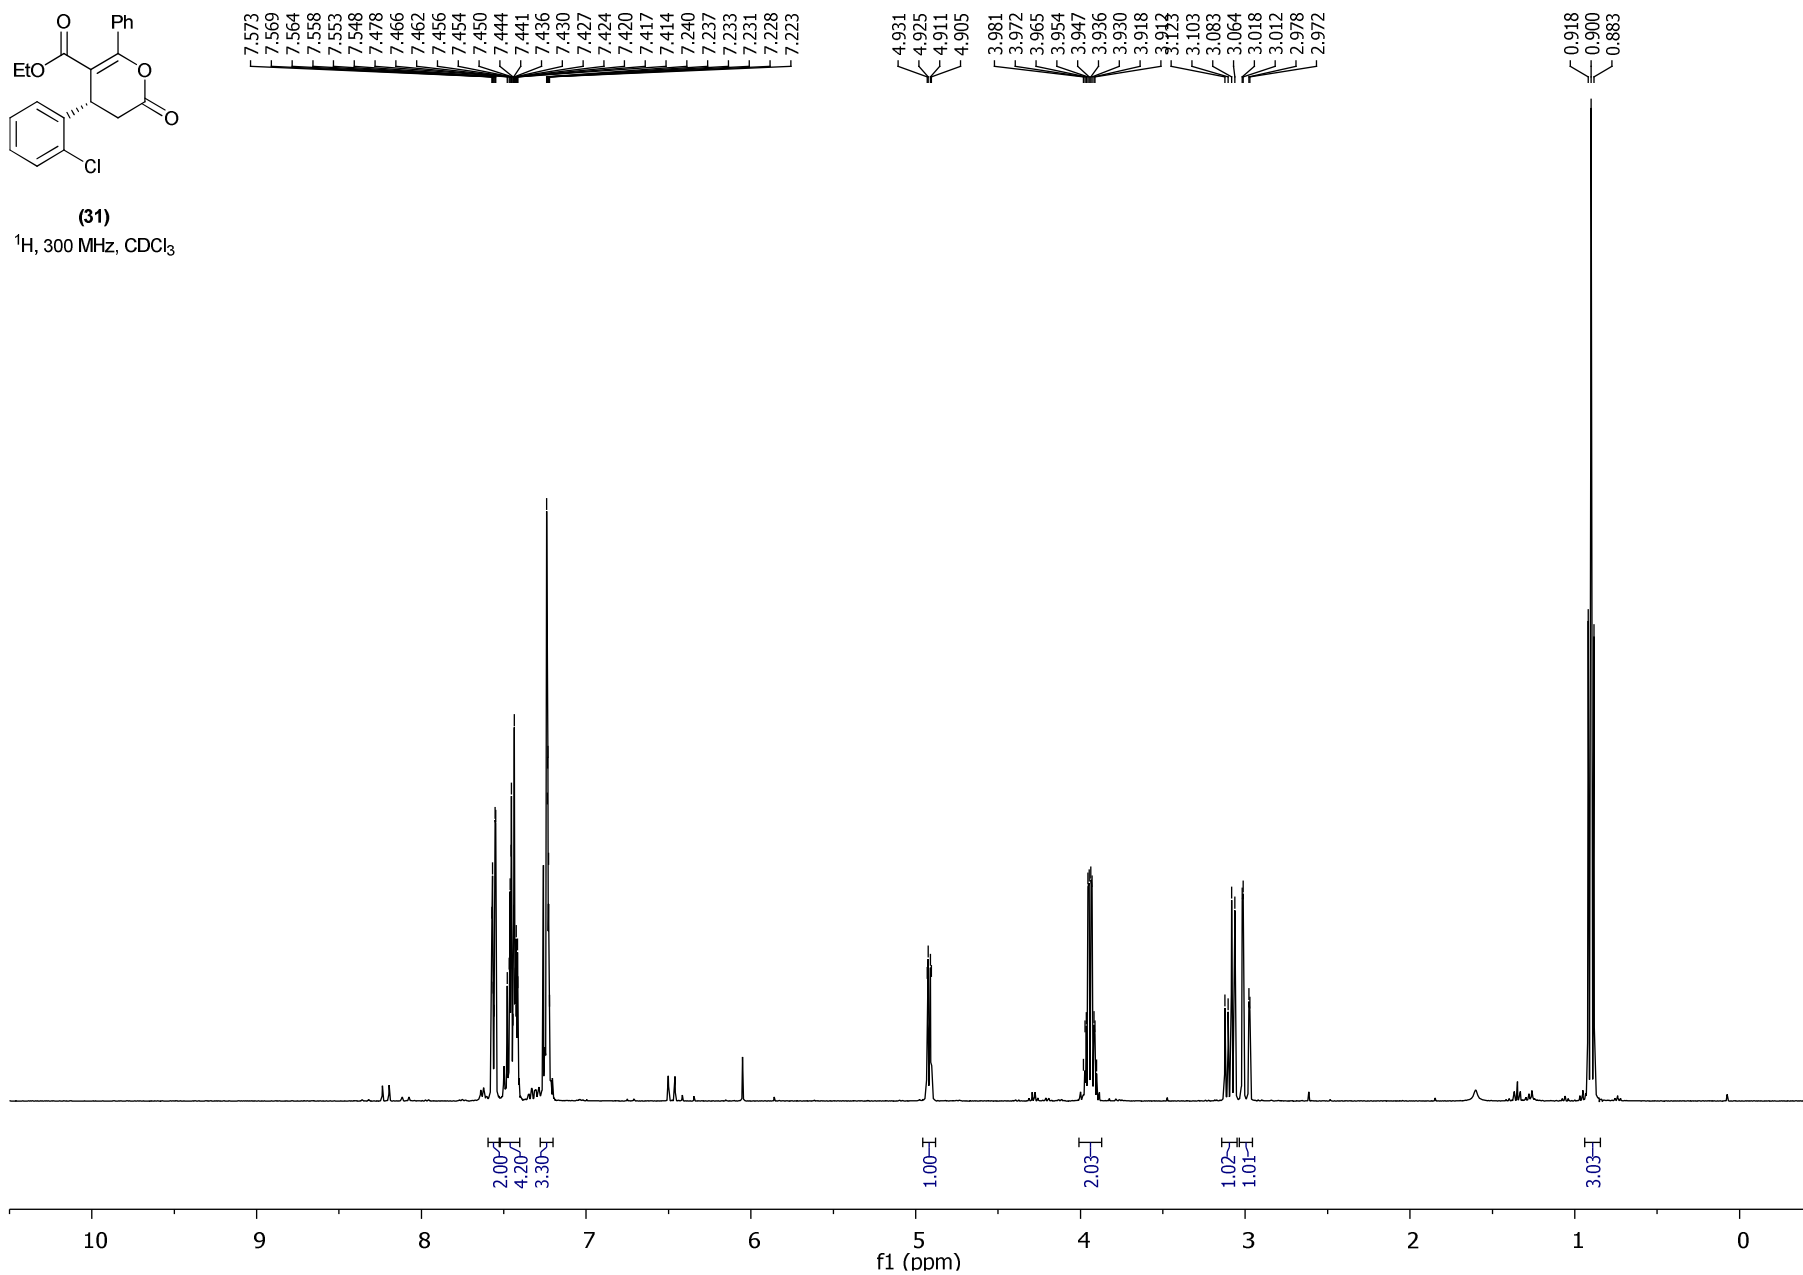

Supporting Information

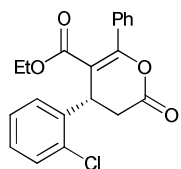

(30)

<sup>13</sup>C, 75 MHz, CDCl<sub>3</sub>

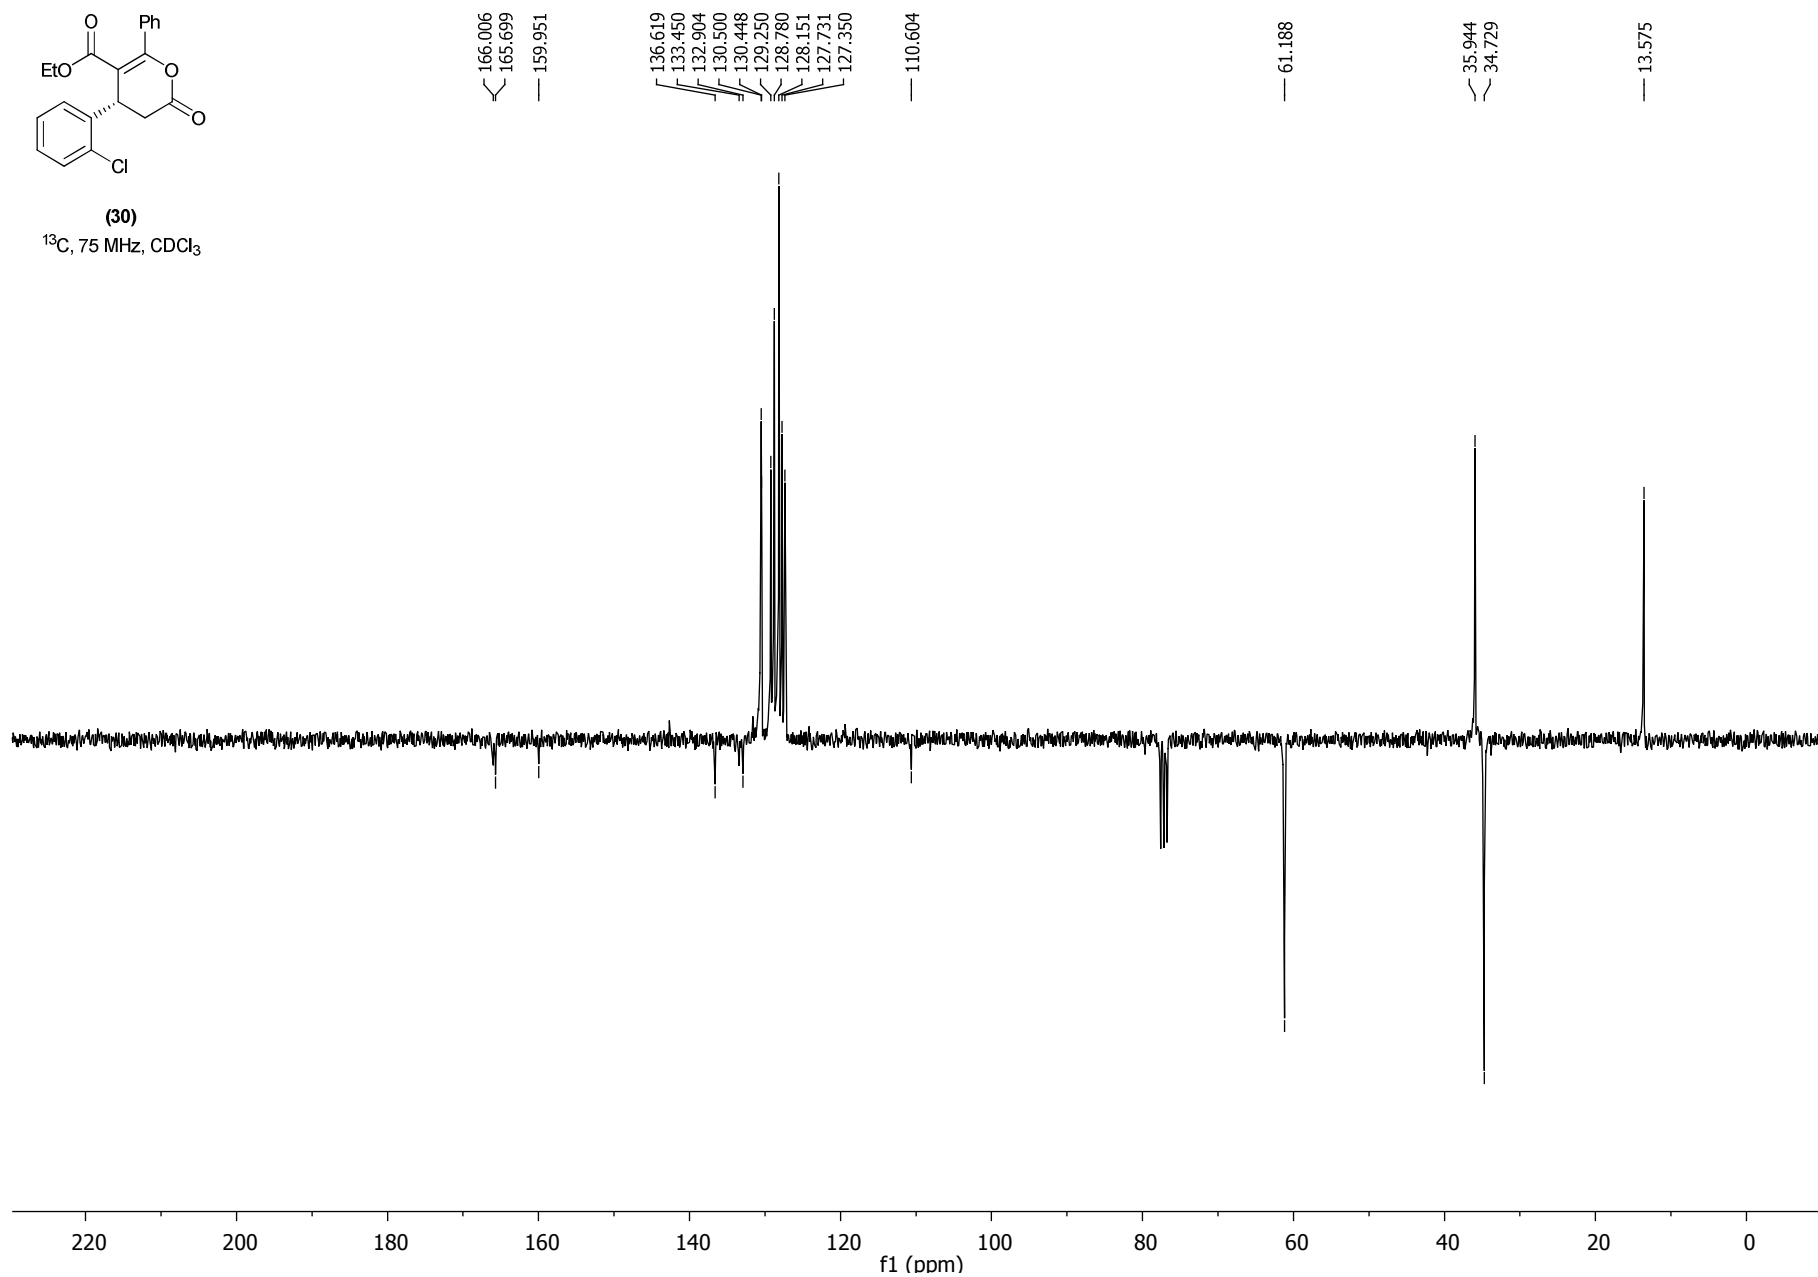

Supporting Information

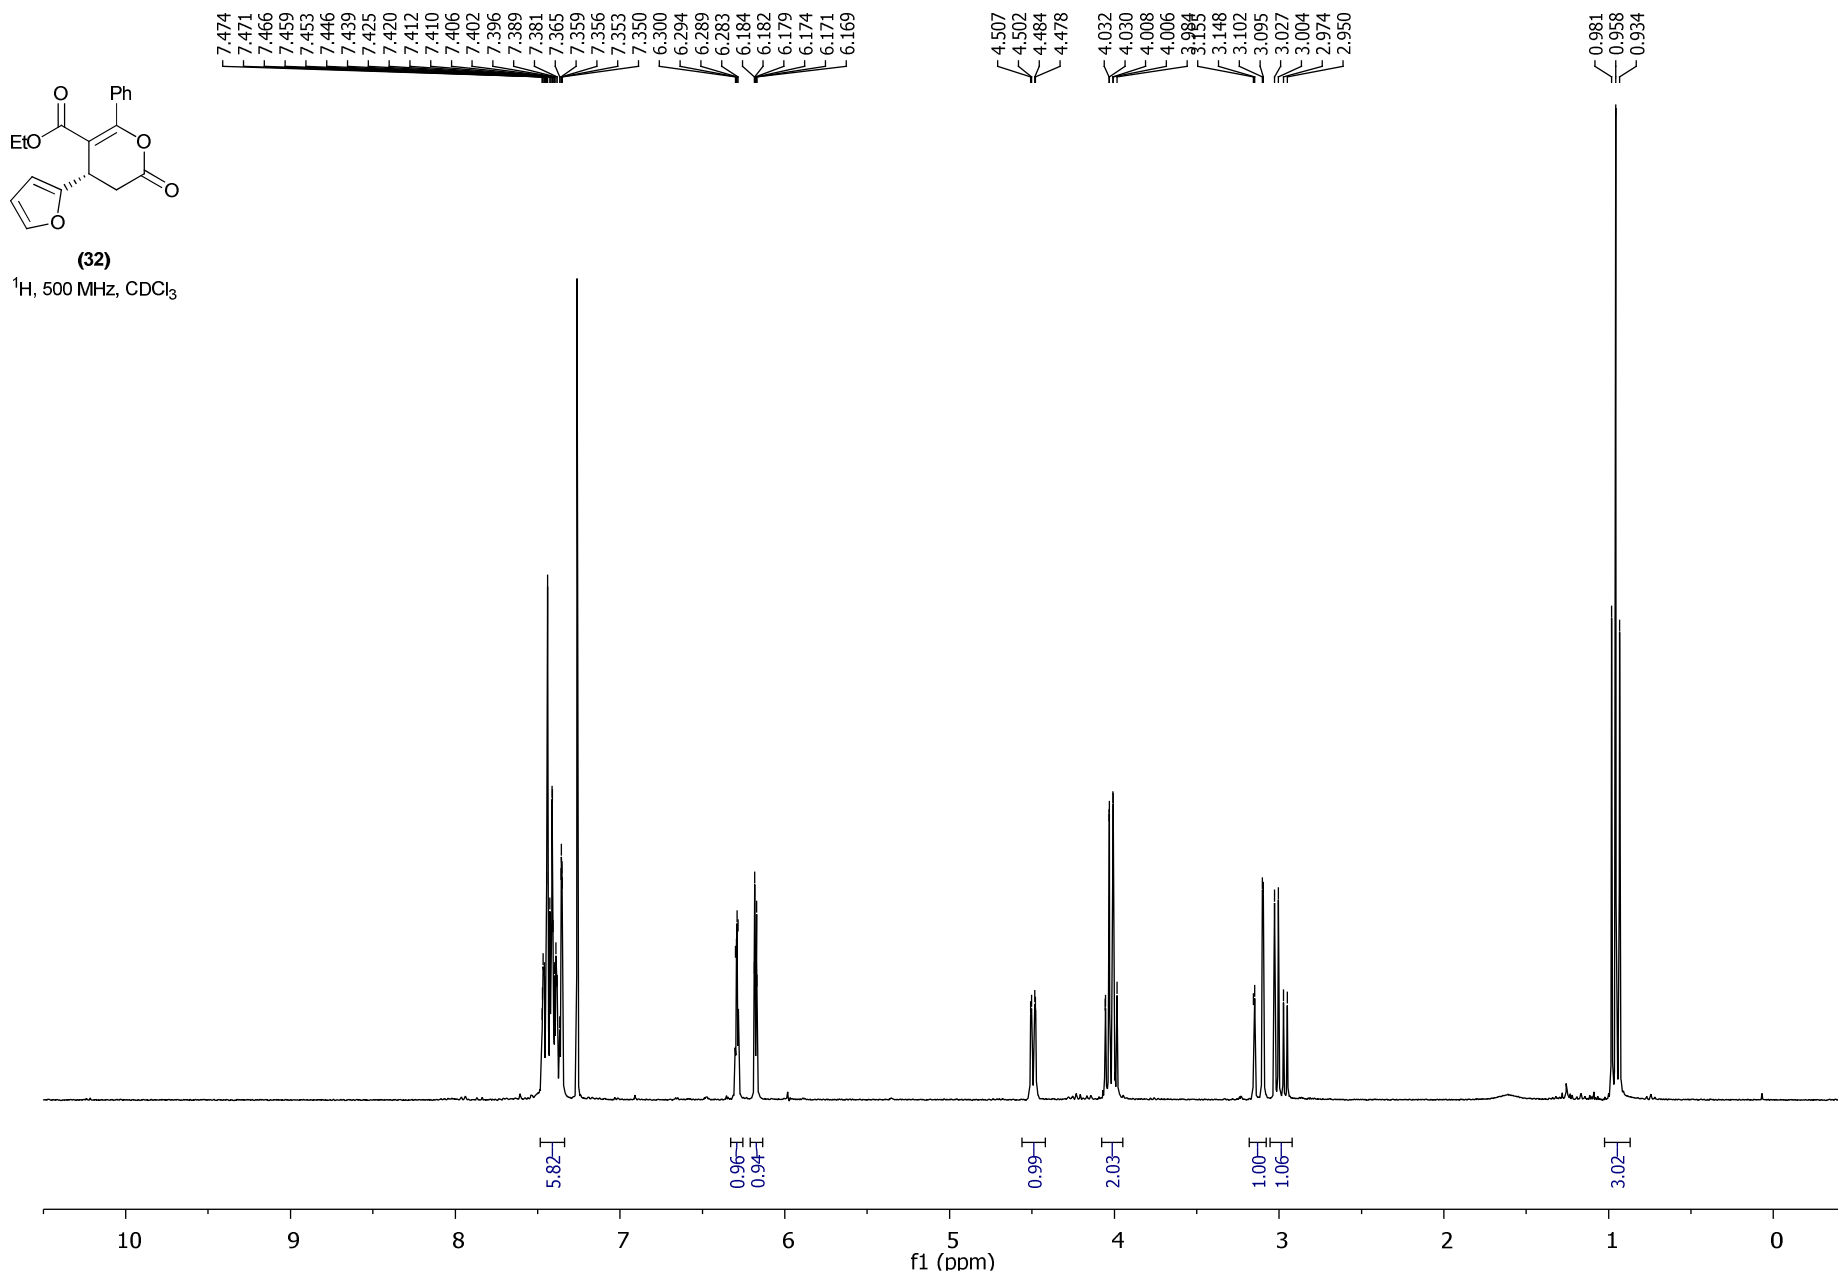

Supporting Information

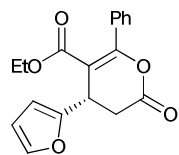

(32)

$^{13}\text{C}$ , 101 MHz,  $\text{CDCl}_3$

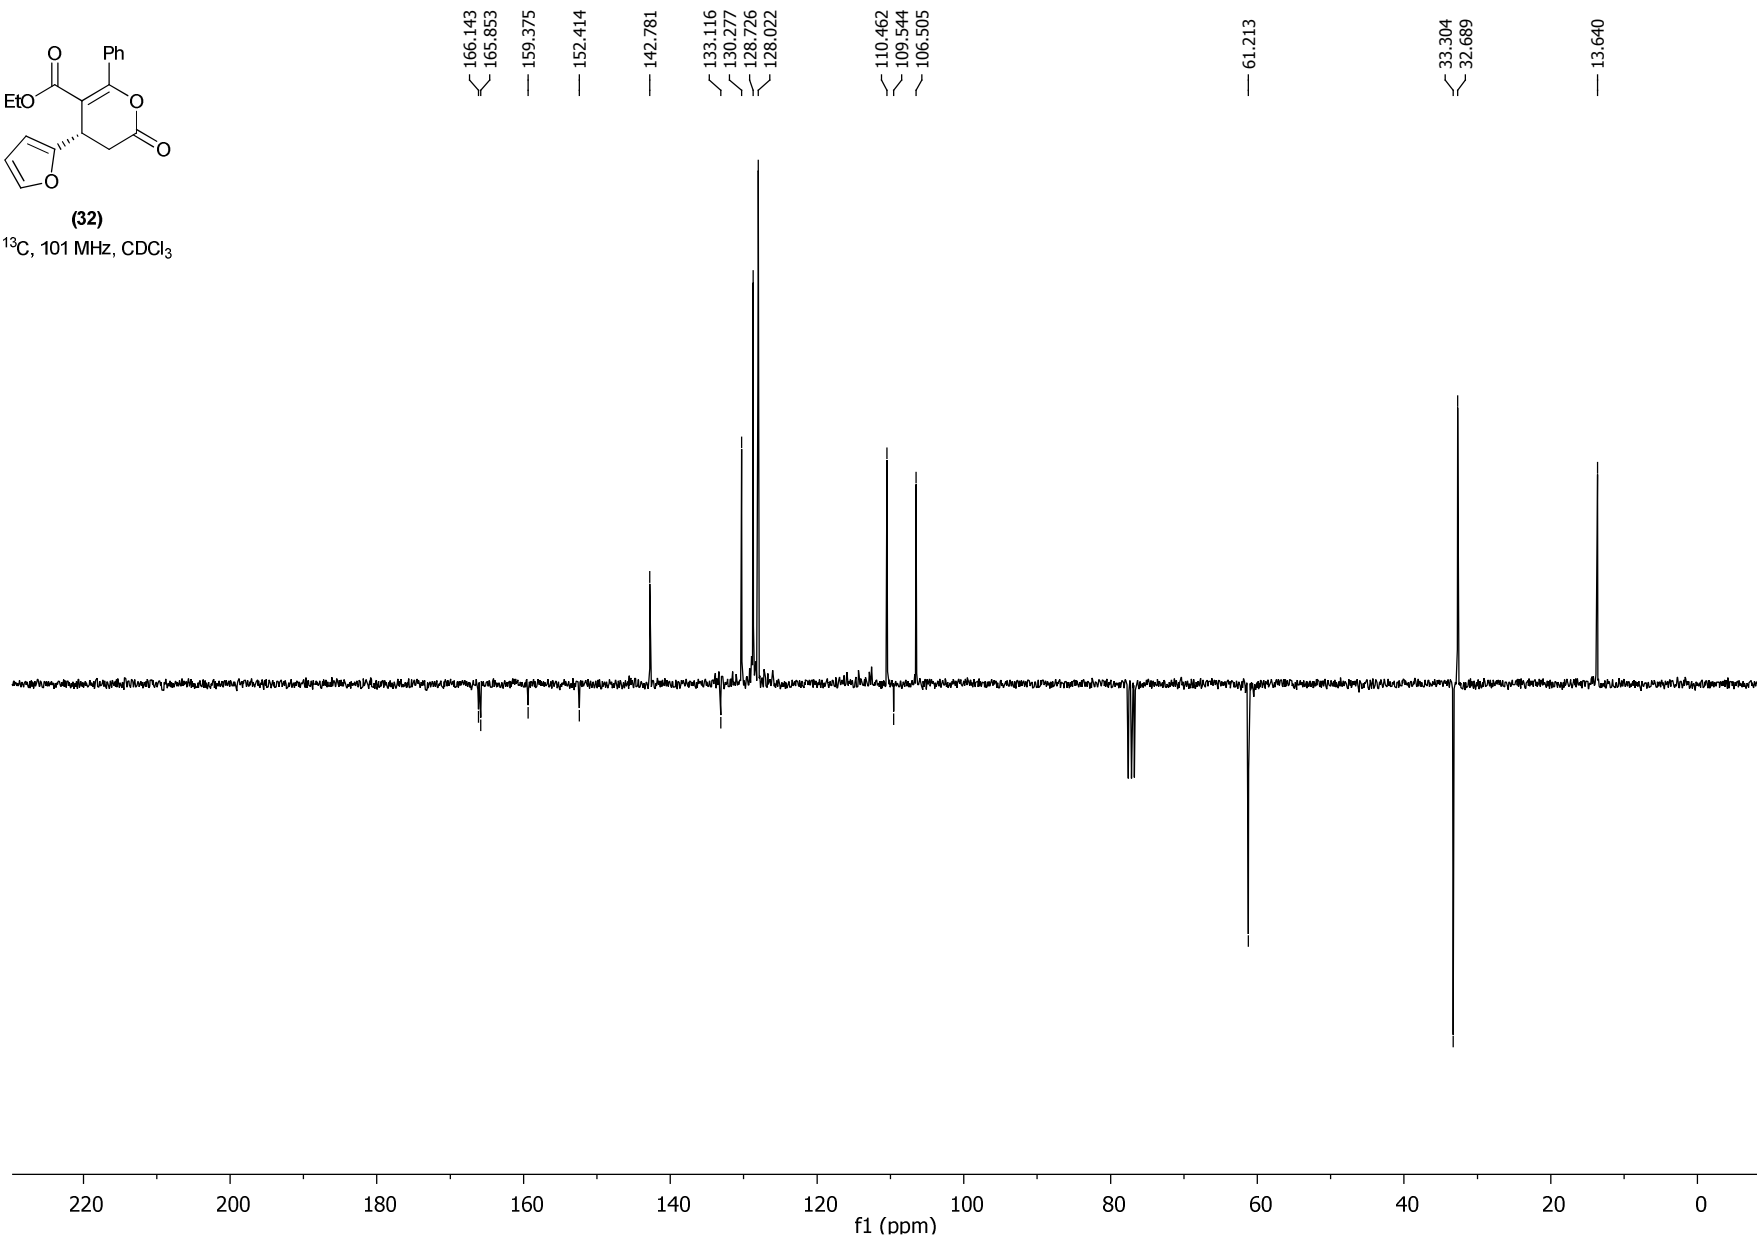

Supporting Information

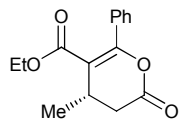

(S18)

<sup>1</sup>H, 500 MHz, CDCl<sub>3</sub>

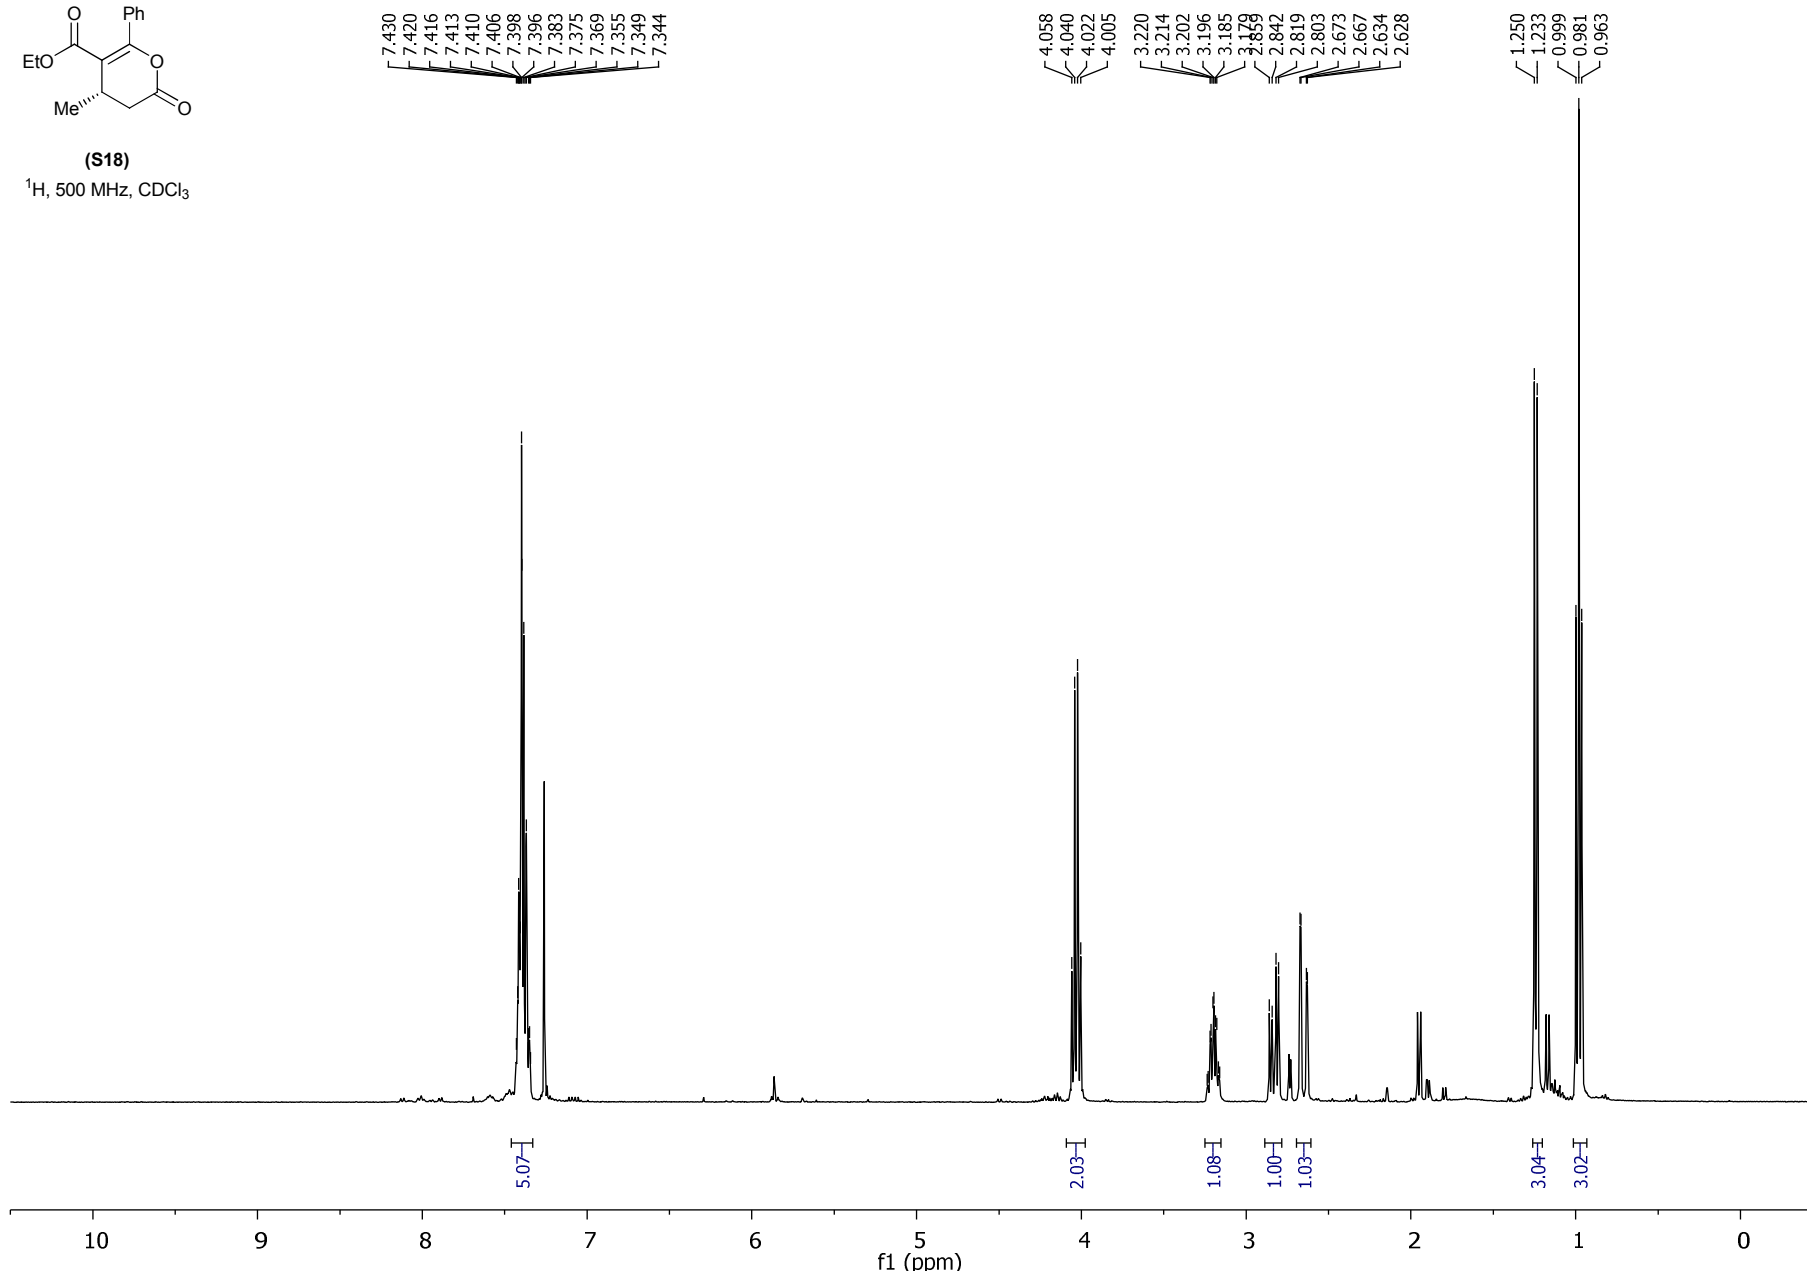

Supporting Information

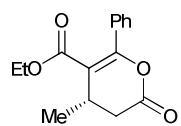

(S18)

$^{13}\text{C}$ , 100 MHz,  $\text{CDCl}_3$

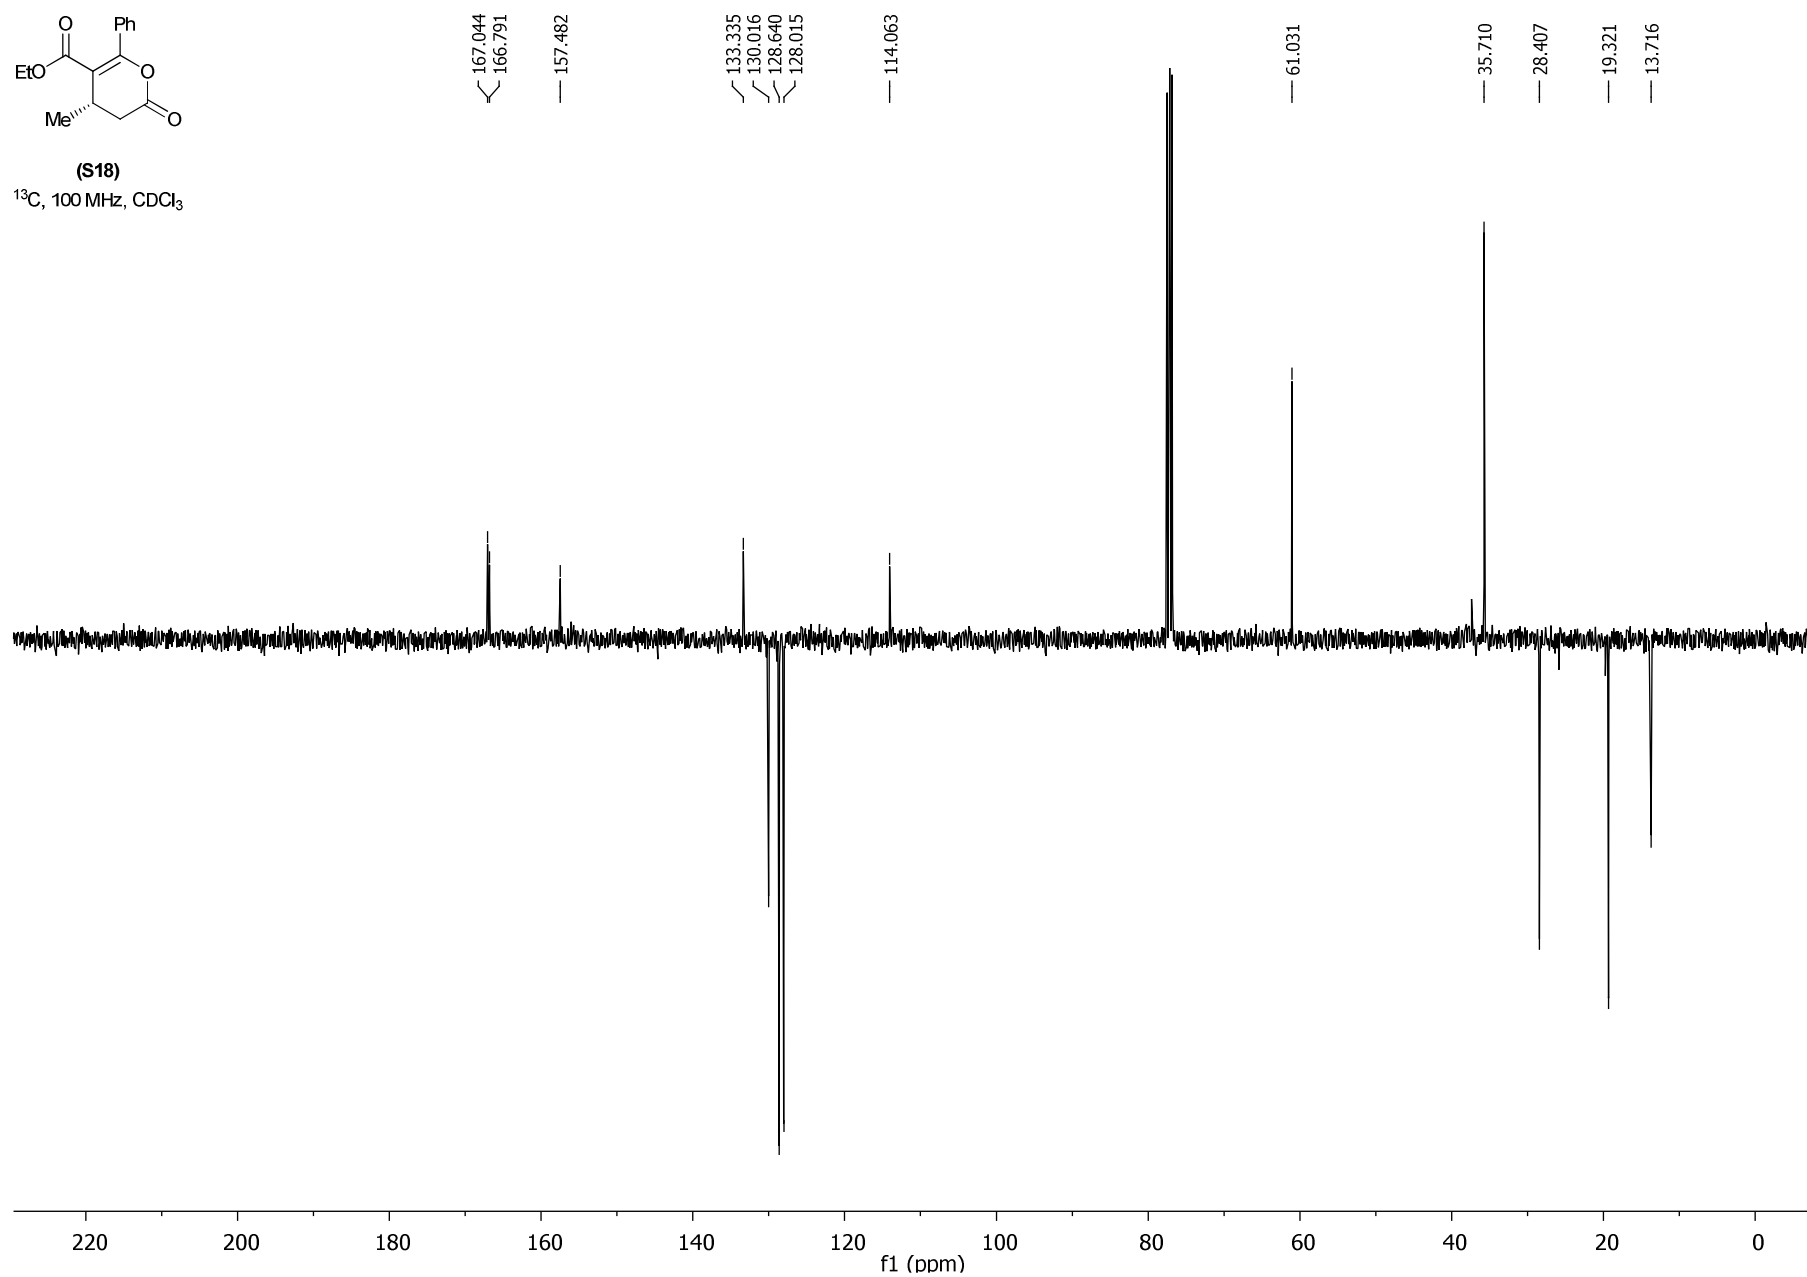



Supporting Information

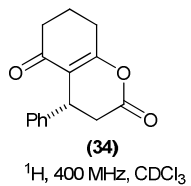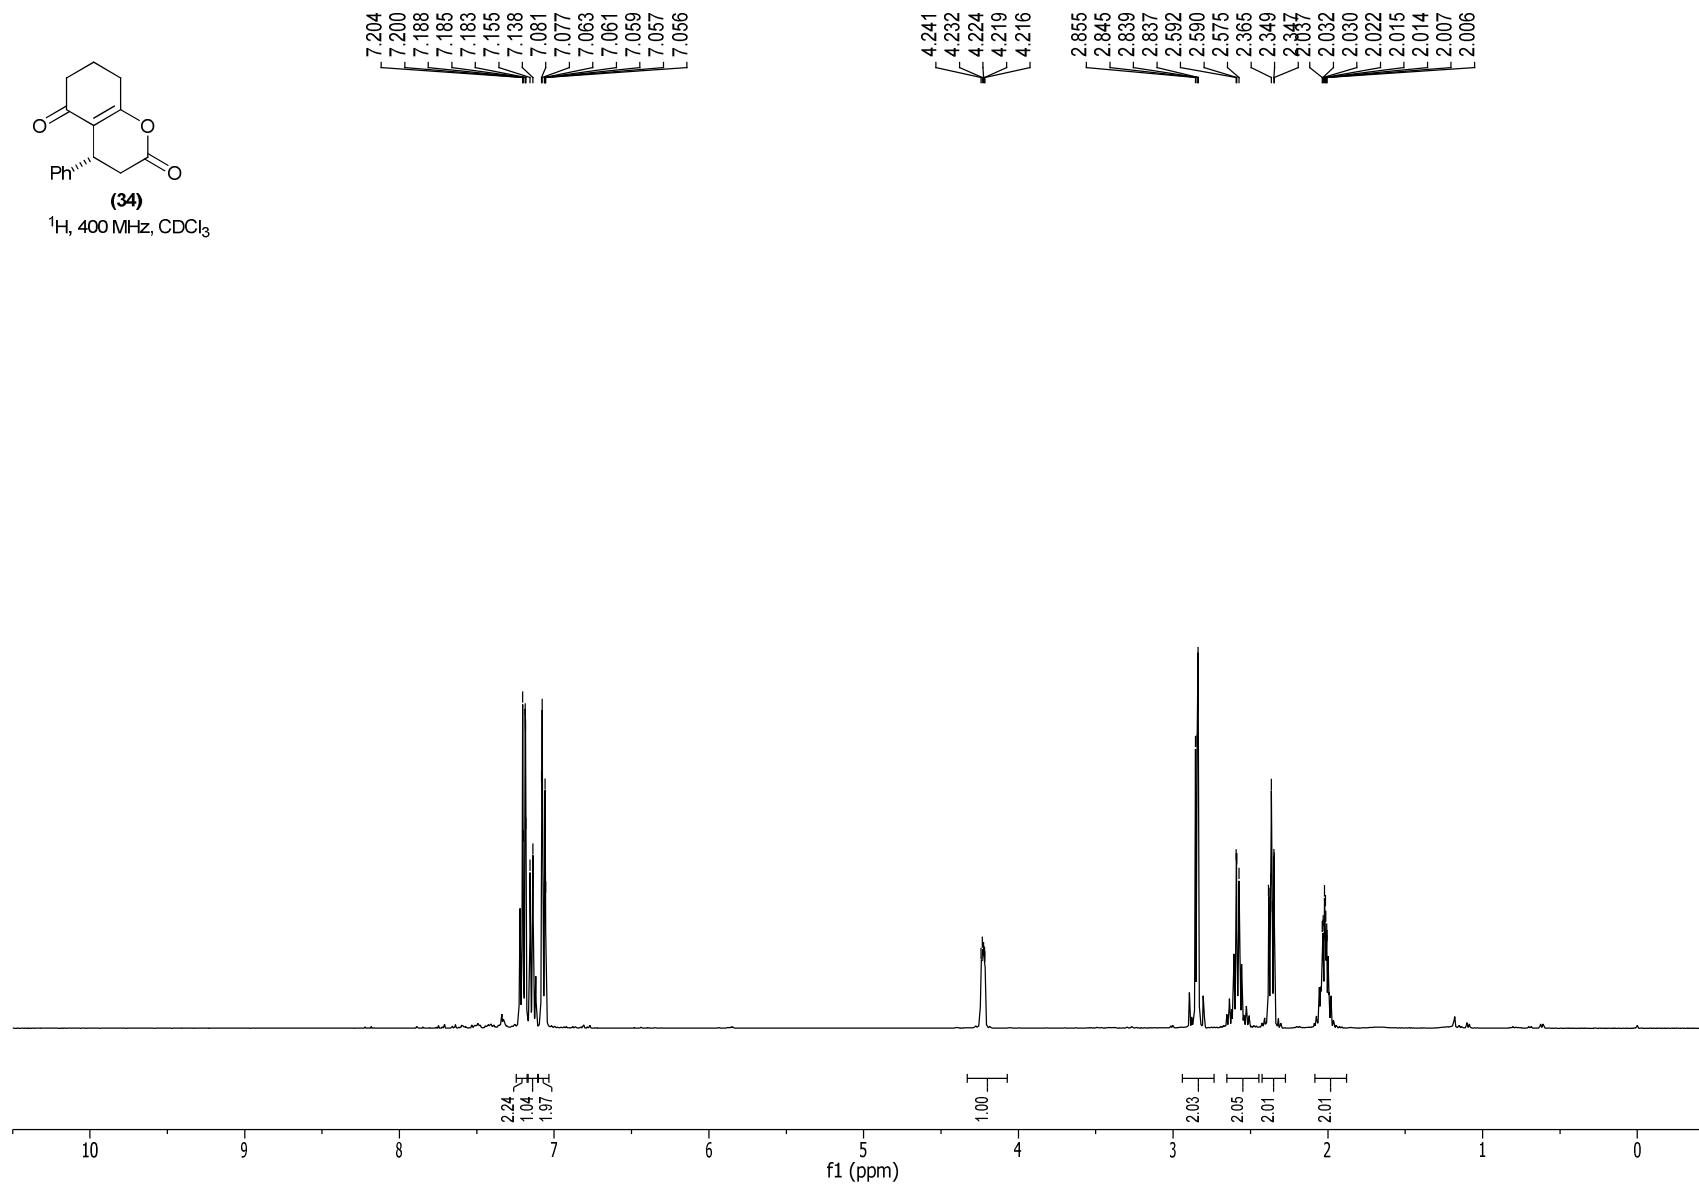

Supporting Information

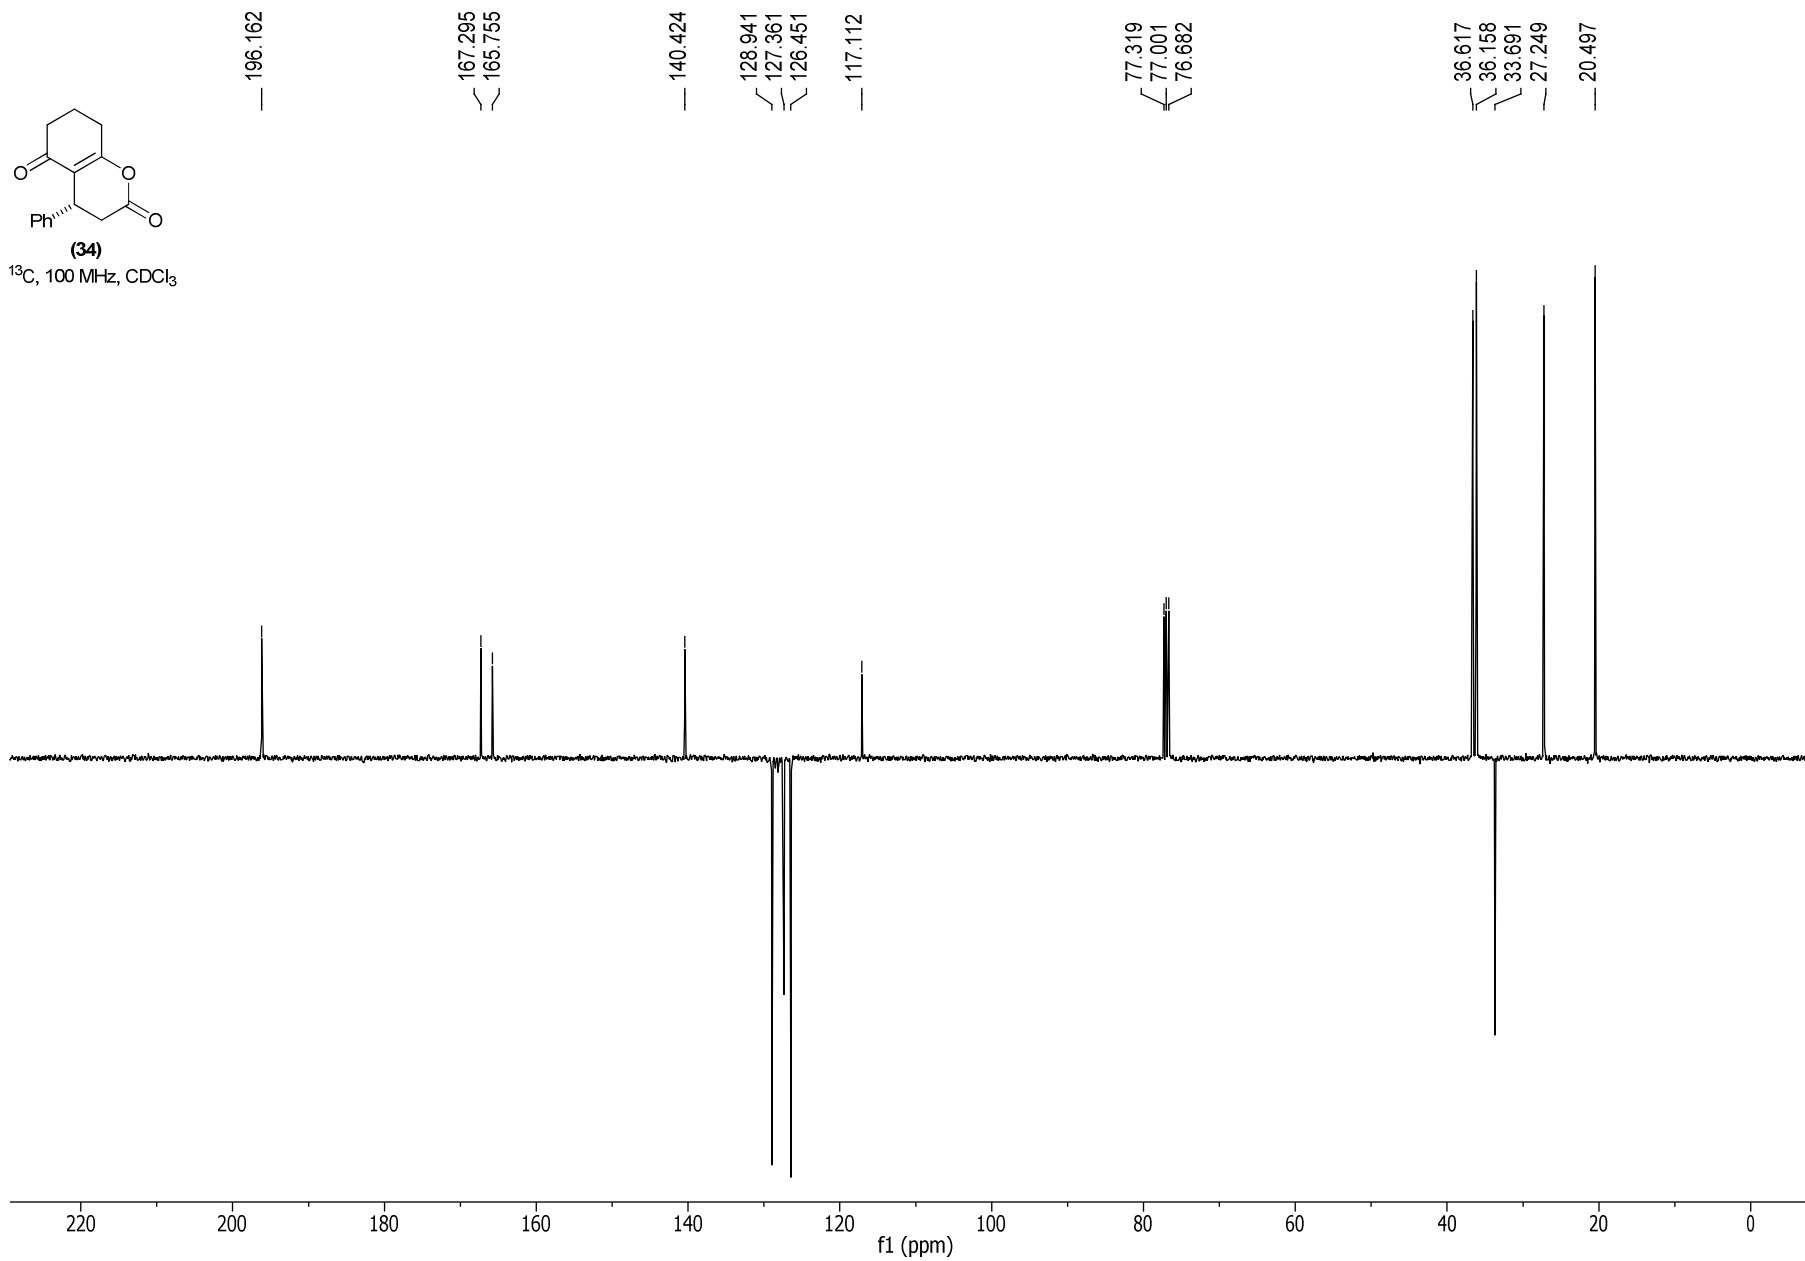

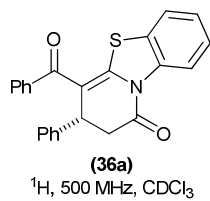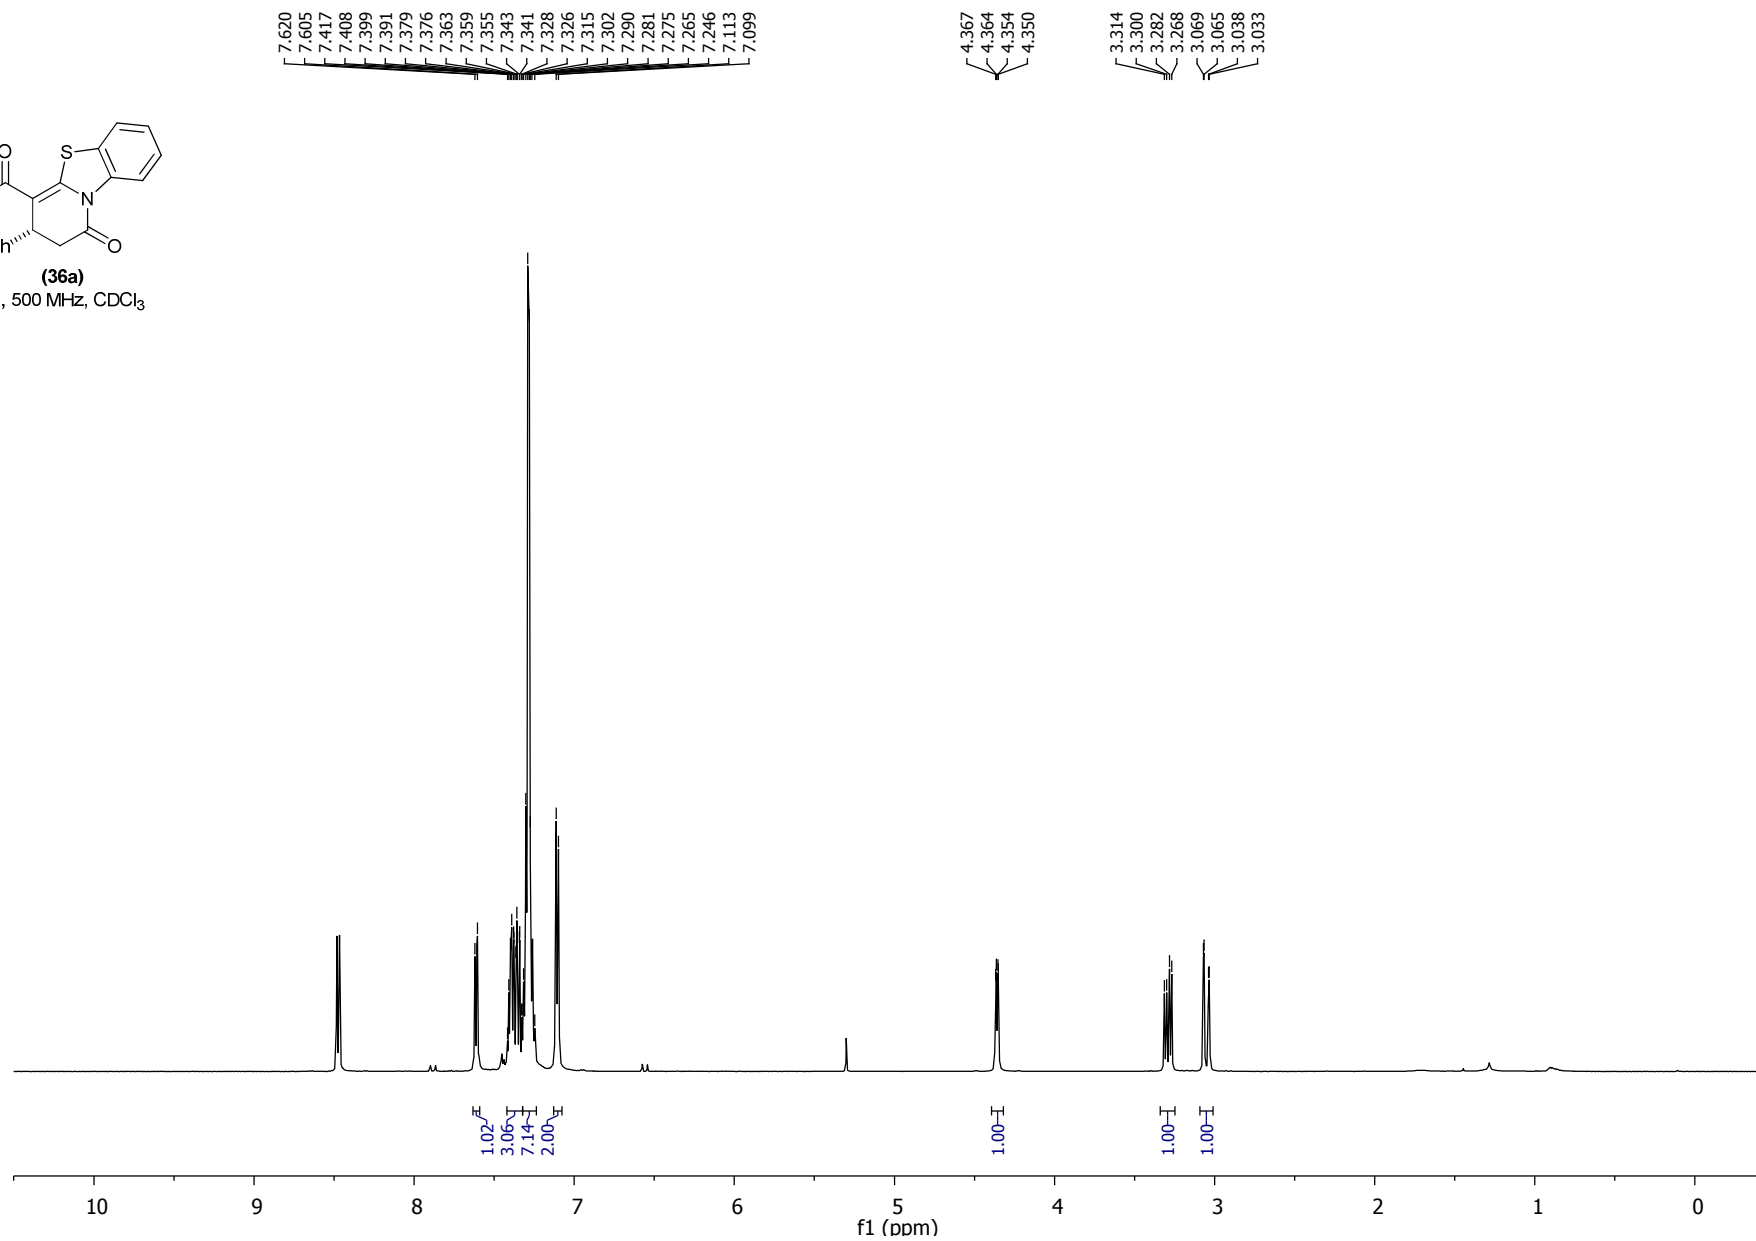

Supporting Information

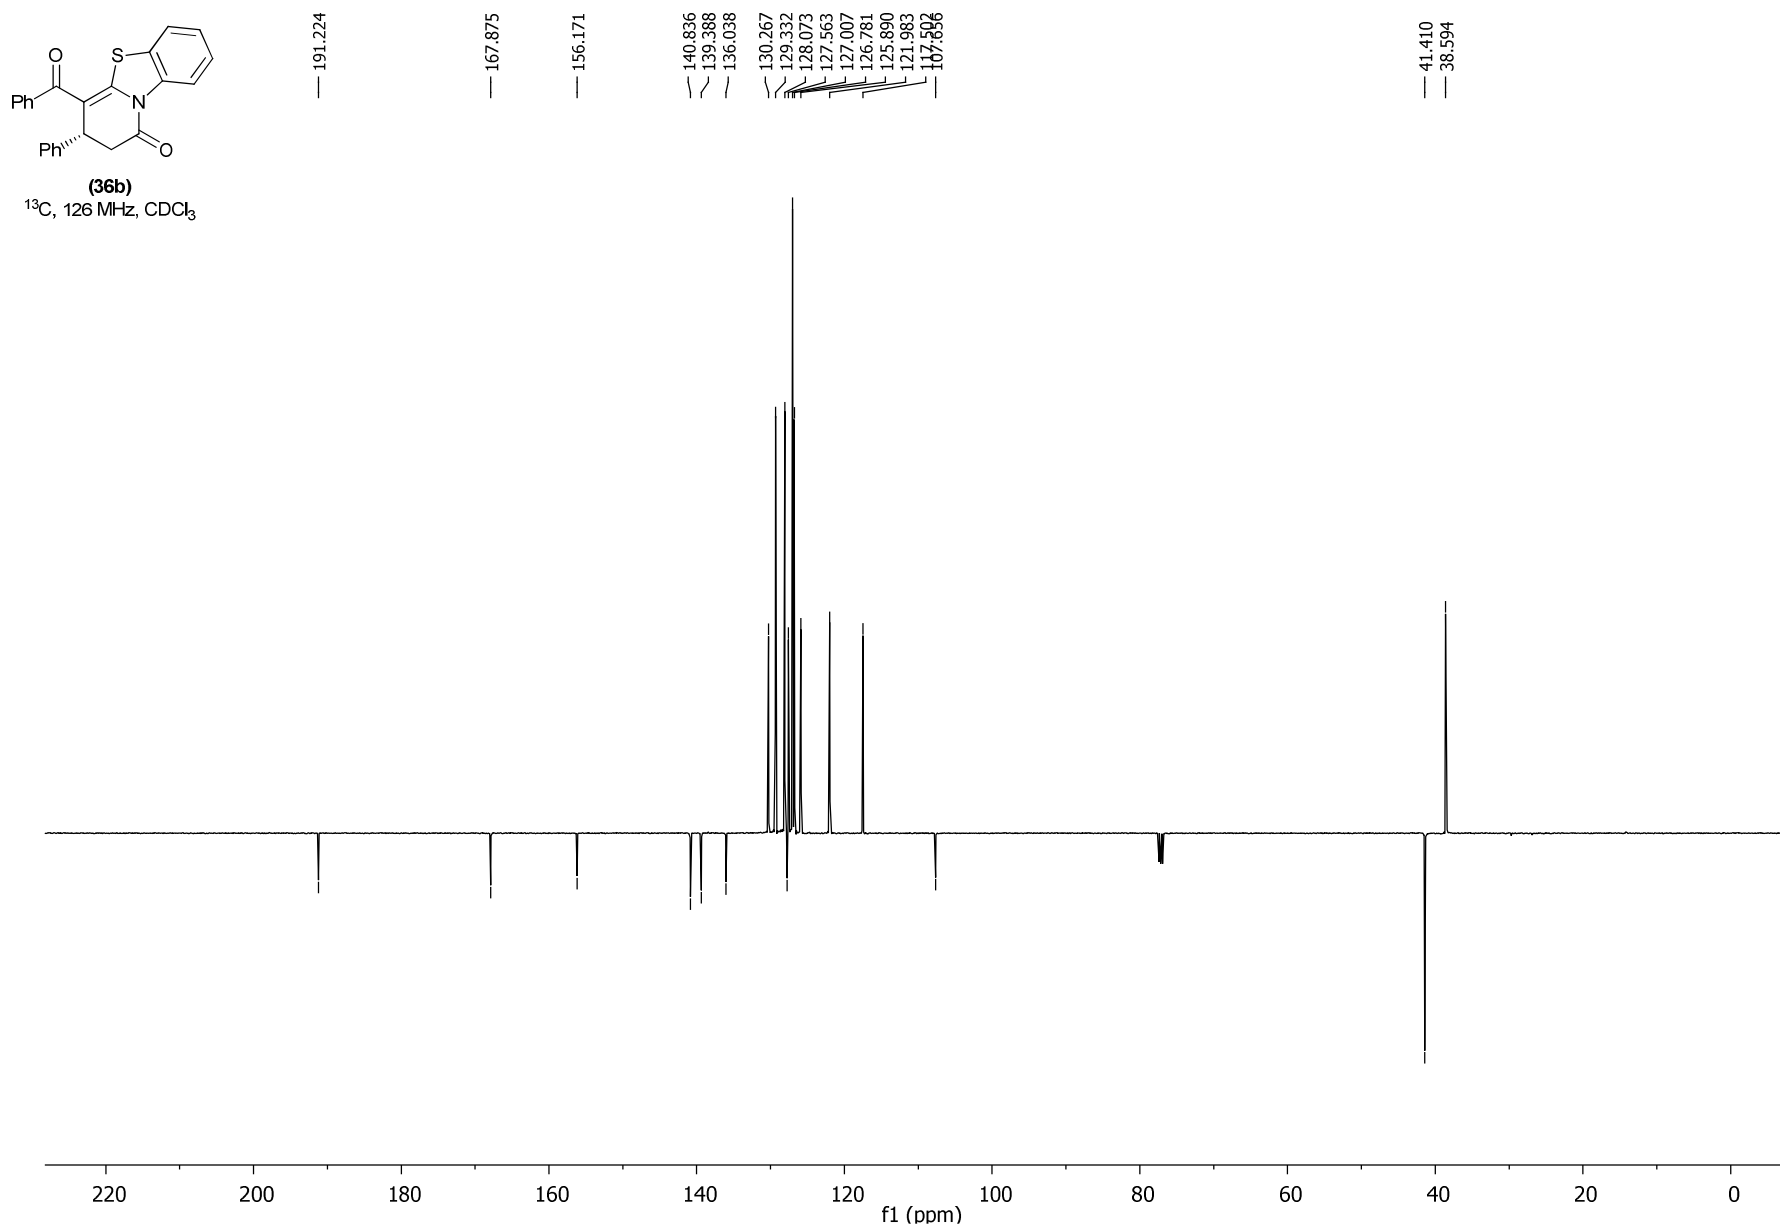

Supporting Information

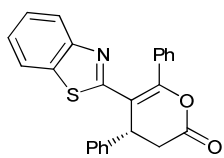

**(37a)**

<sup>1</sup>H, 300 MHz, CDCl<sub>3</sub>

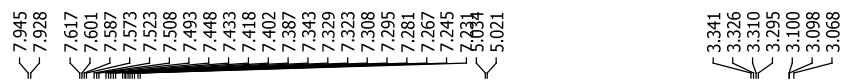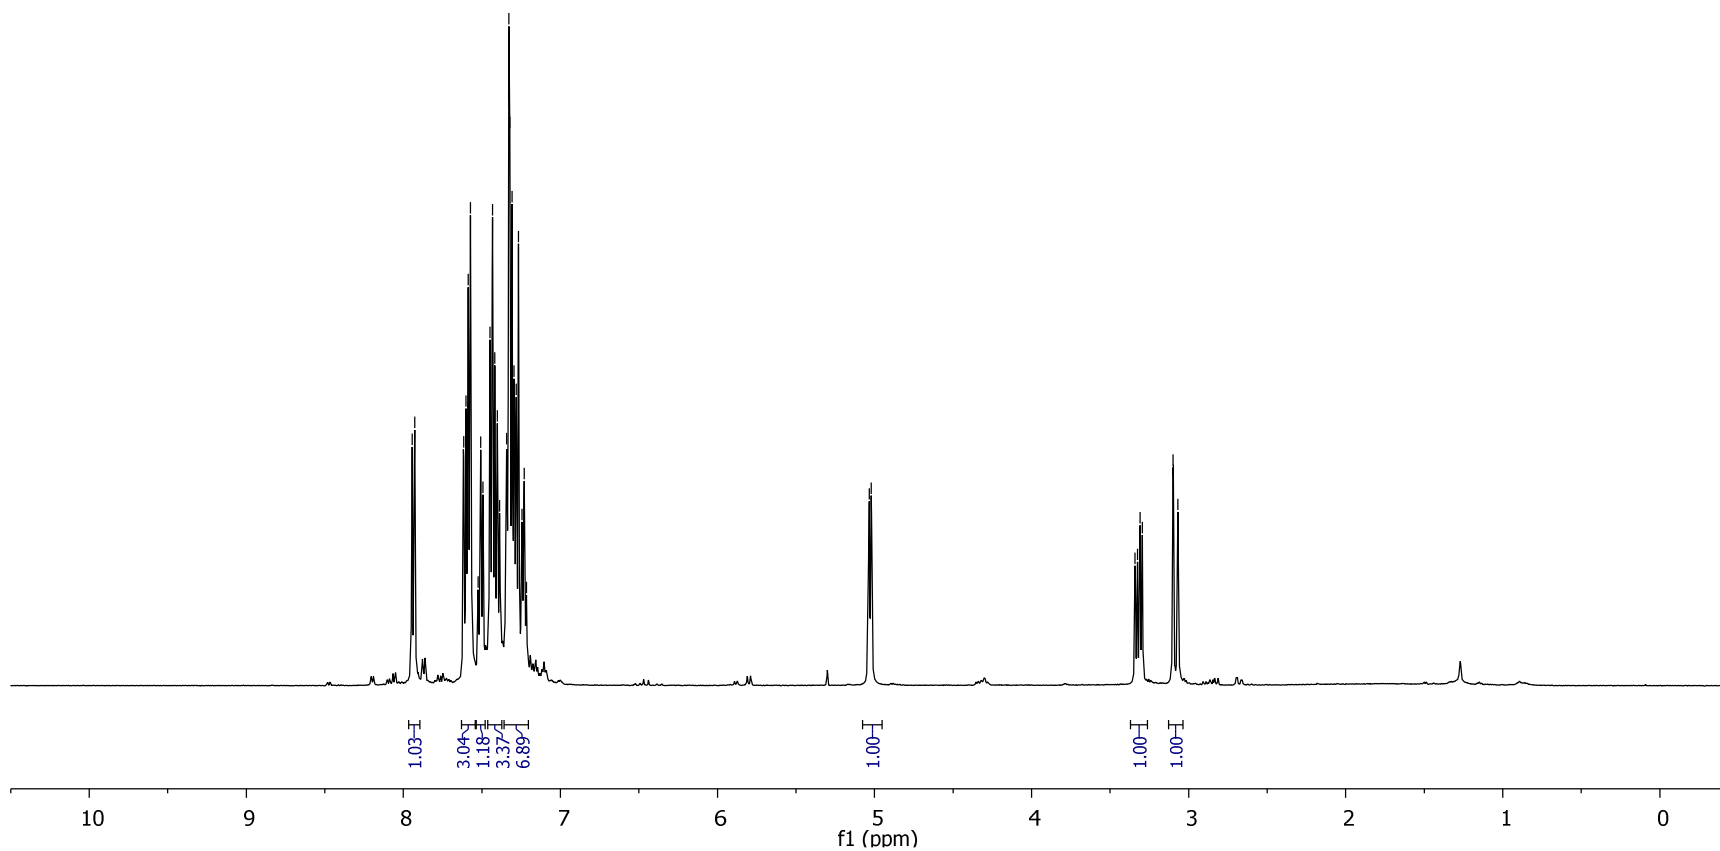

Supporting Information

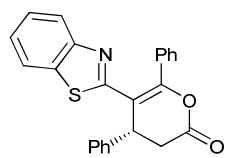

$^{13}\text{C}$ , 75 MHz,  $\text{CDCl}_3$

166.642  
164.207  
154.367  
152.429  
139.620  
135.732  
130.832  
130.063  
129.265  
128.933  
127.785  
127.038  
126.105  
125.449  
123.099  
121.288  
115.097

41.269  
36.939

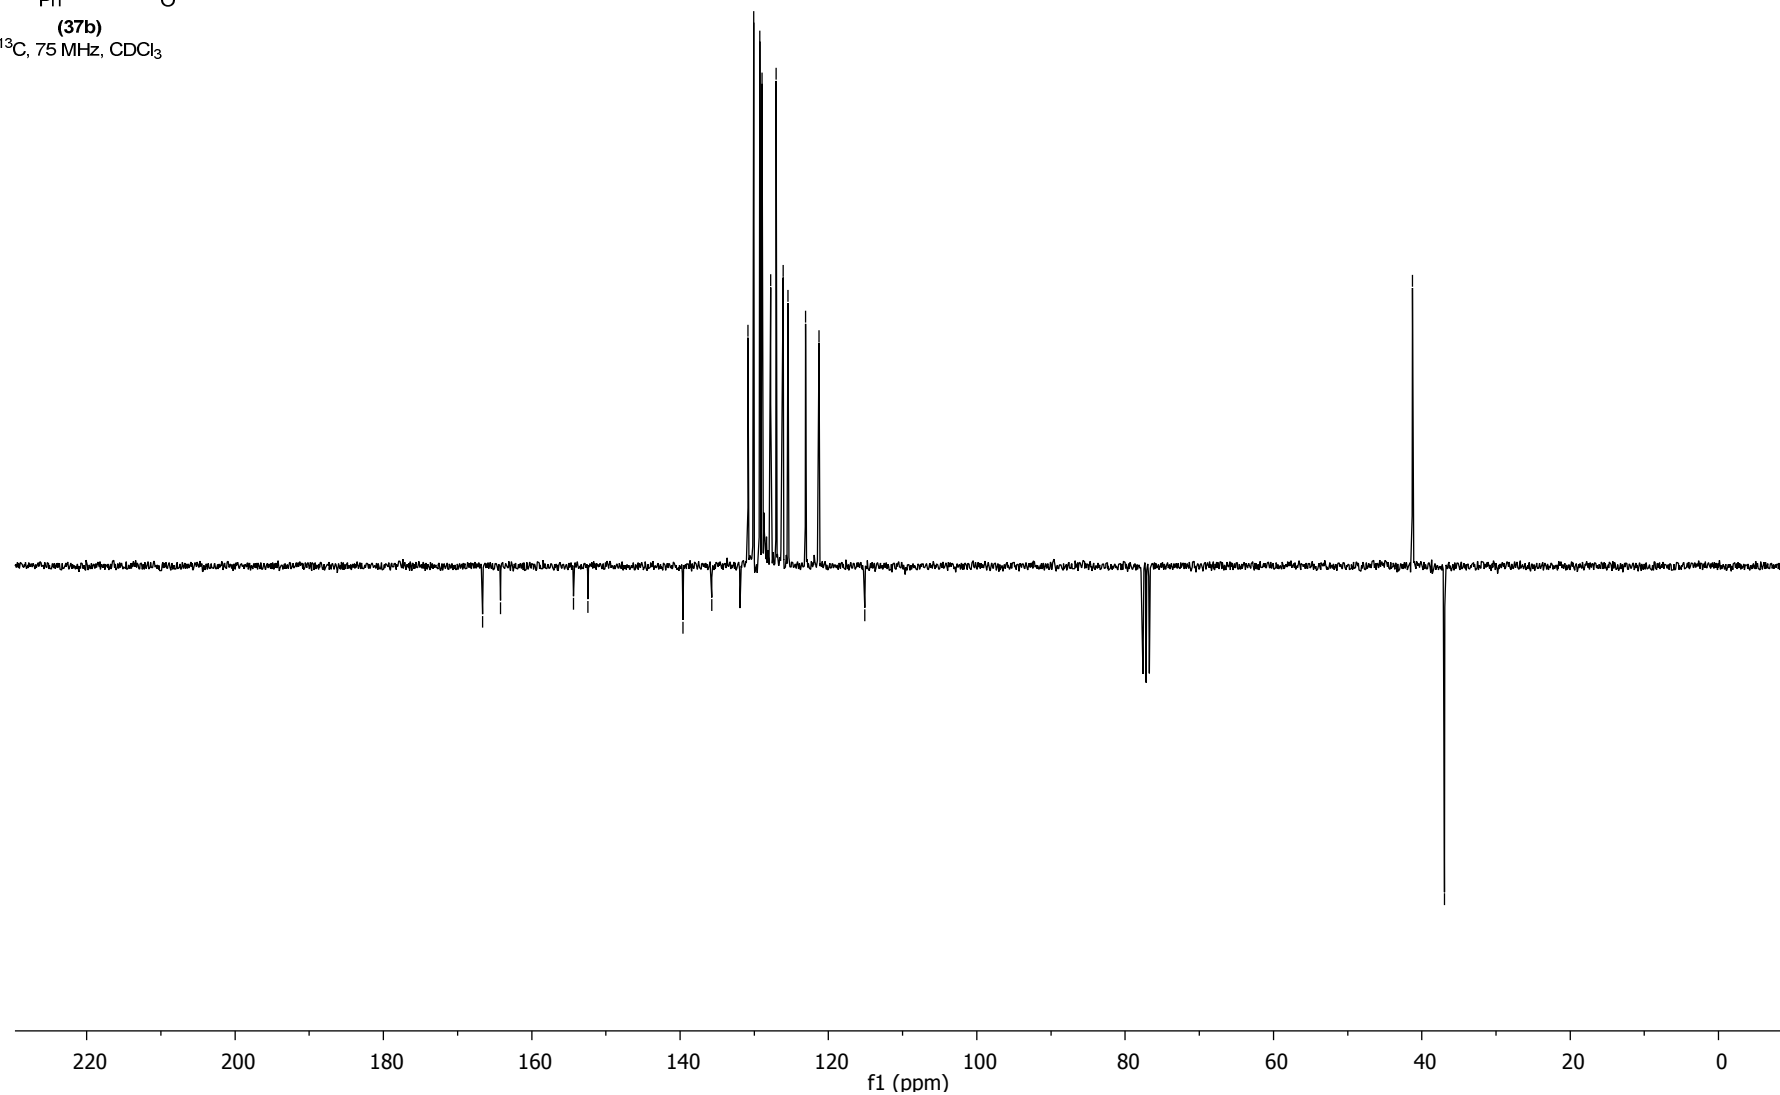

Supporting Information

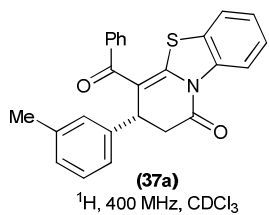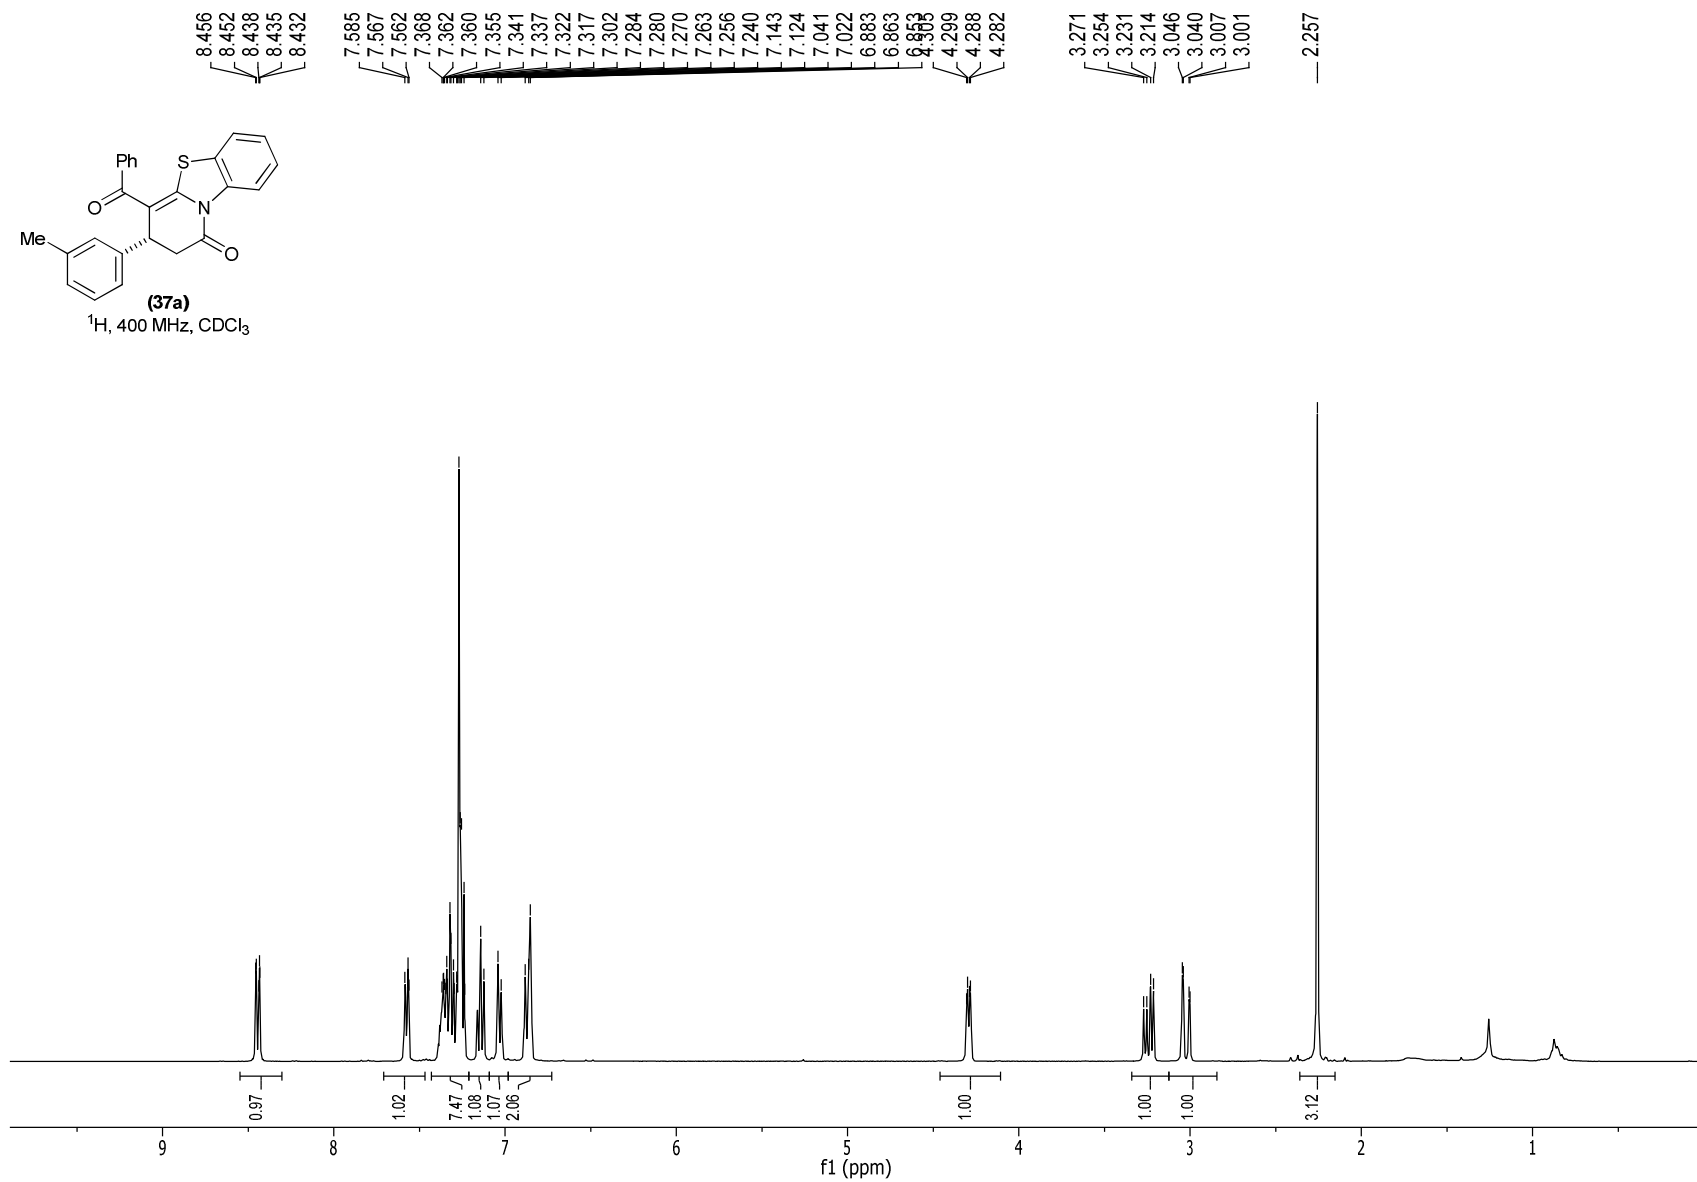

Supporting Information

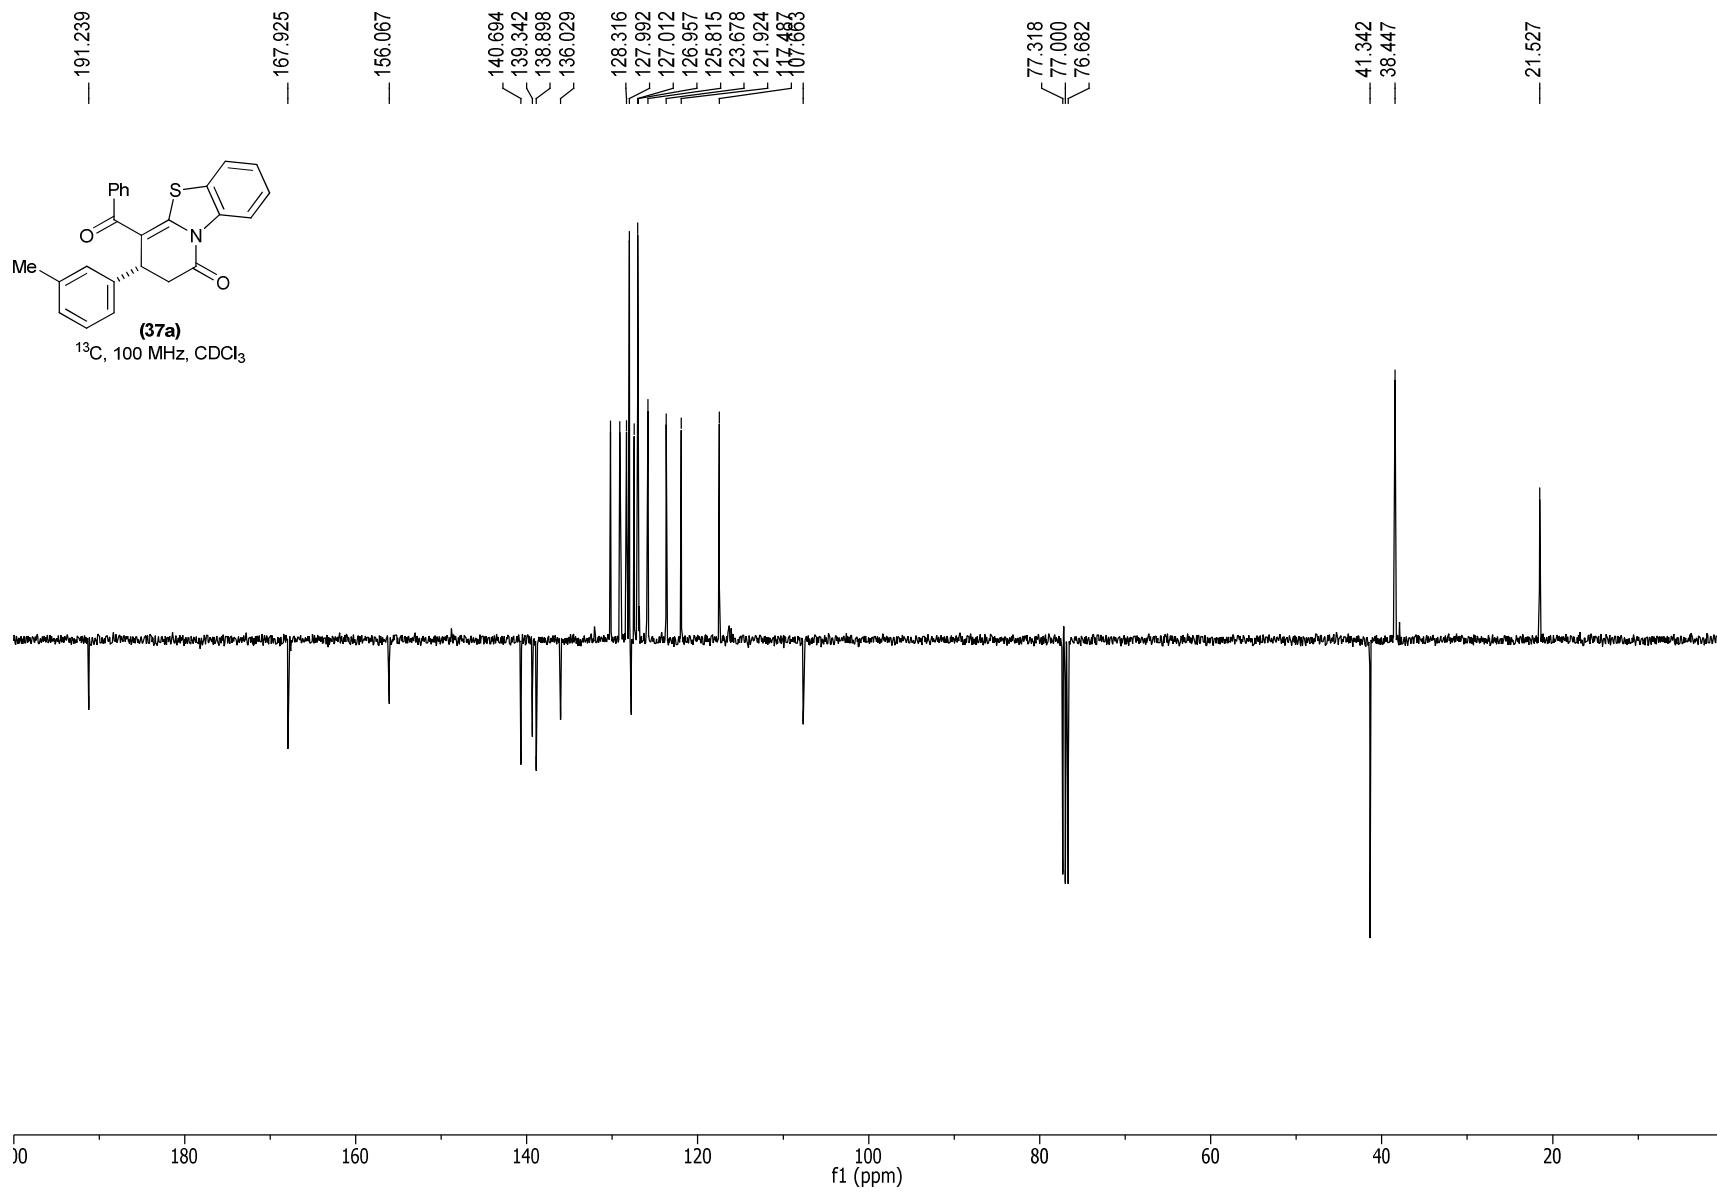



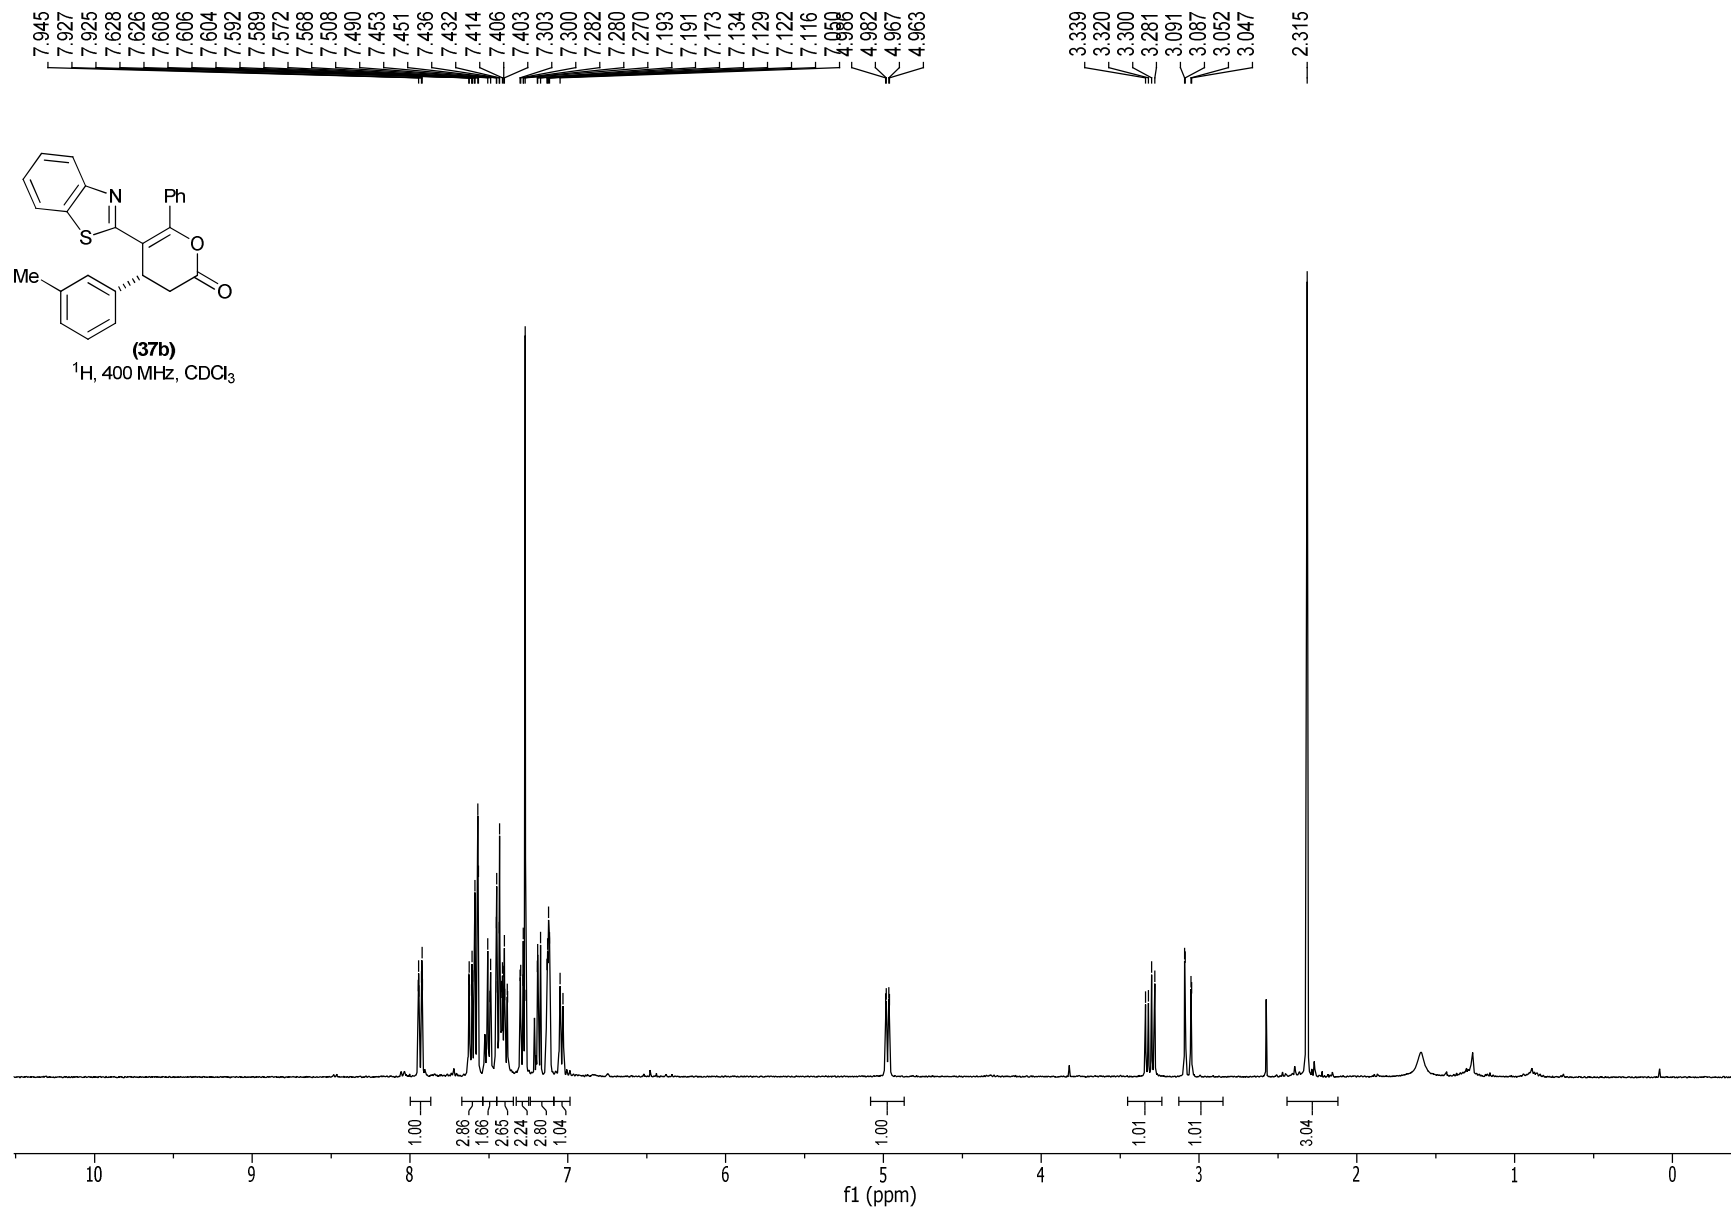

Supporting Information

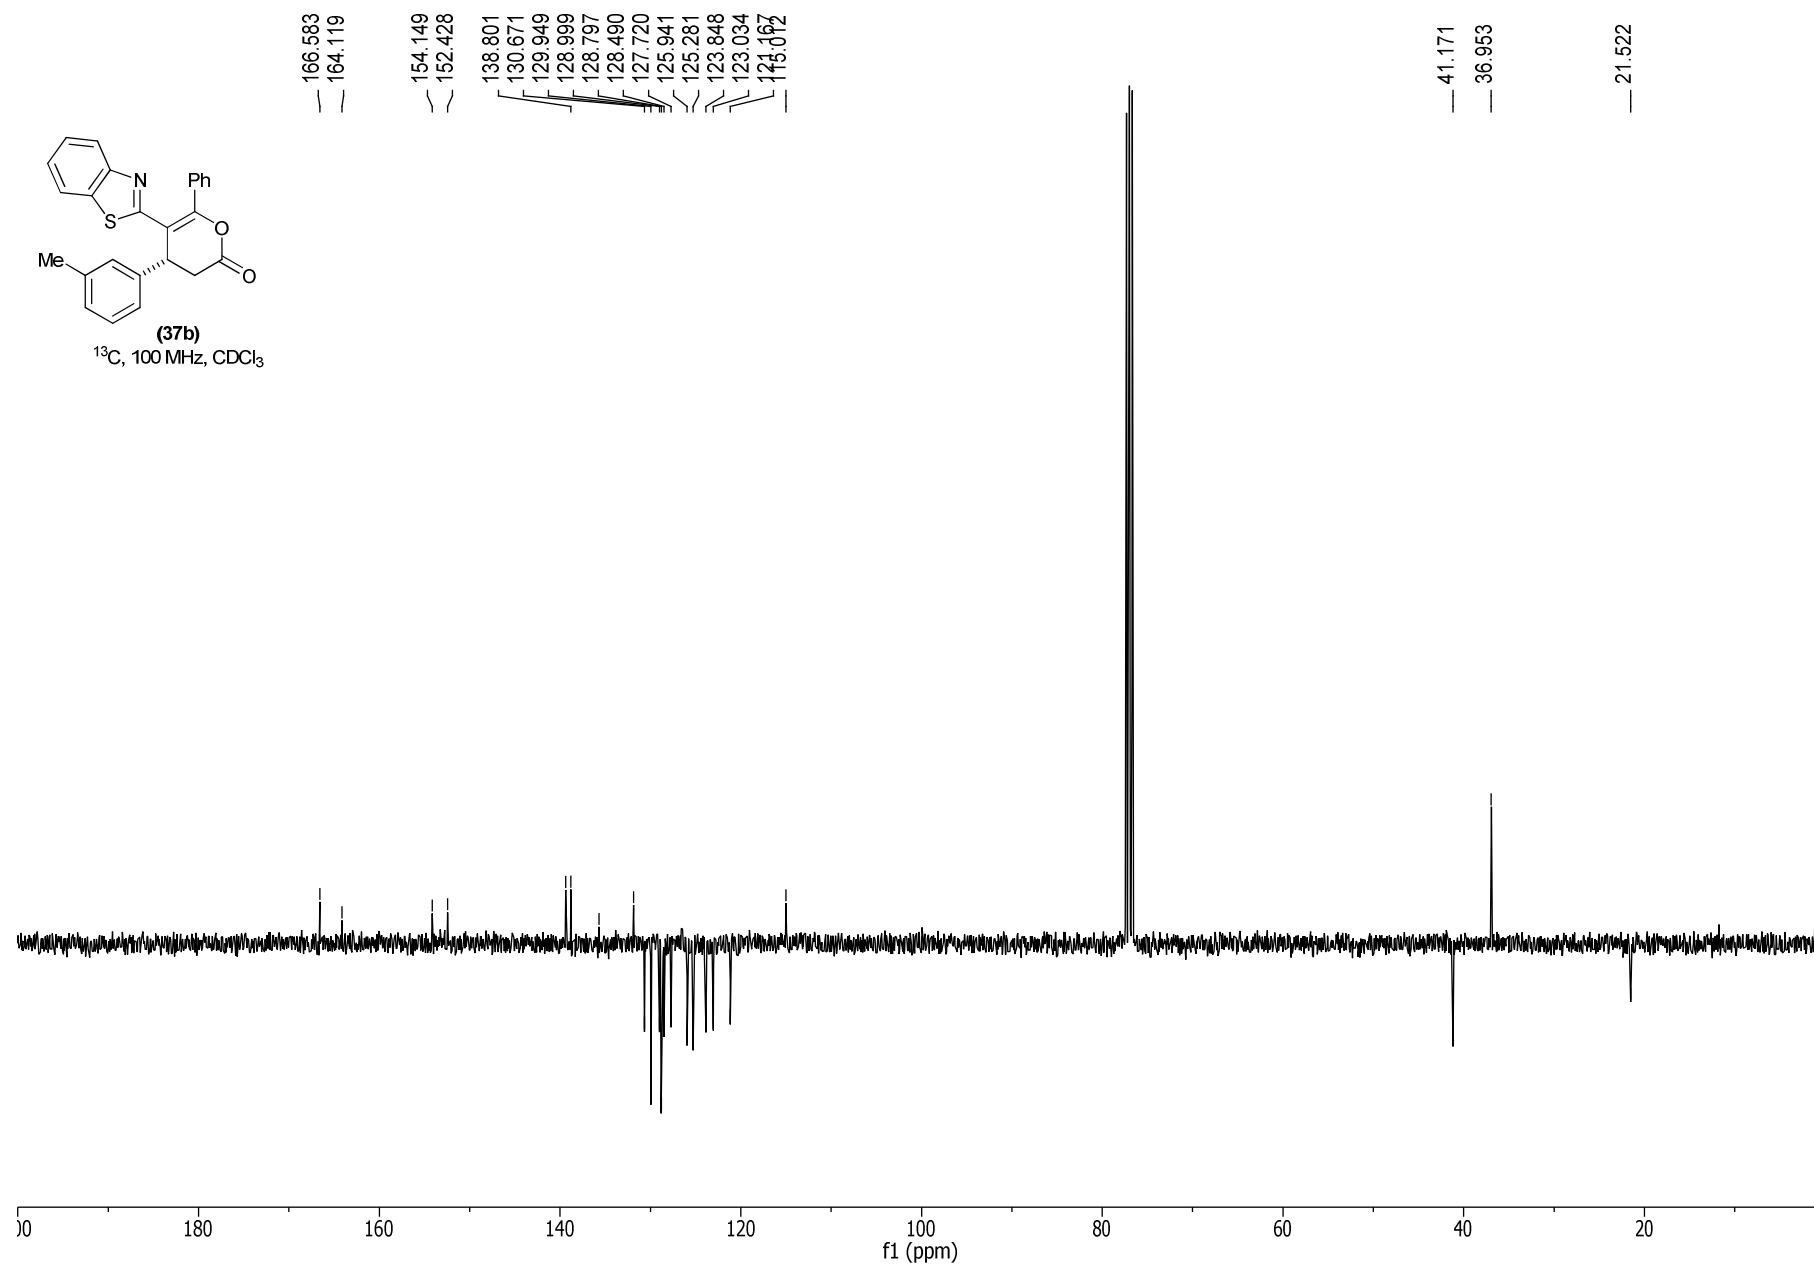

Supporting Information

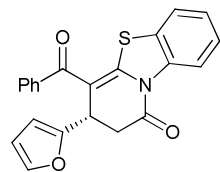

(38a)

<sup>1</sup>H, 300 MHz, CDCl<sub>3</sub>

8.518  
8.514  
8.494  
8.490  
8.487  
7.447  
7.443  
7.410  
7.408  
7.384  
7.351  
7.326  
7.324  
6.238  
6.233  
6.227  
5.987  
5.984  
5.981  
5.976  
5.973  
5.970  
4.448  
4.445  
4.439  
4.436  
4.428  
4.425  
4.419  
4.416  
3.276  
3.267  
3.222  
3.214  
3.193  
3.173  
3.139  
3.120

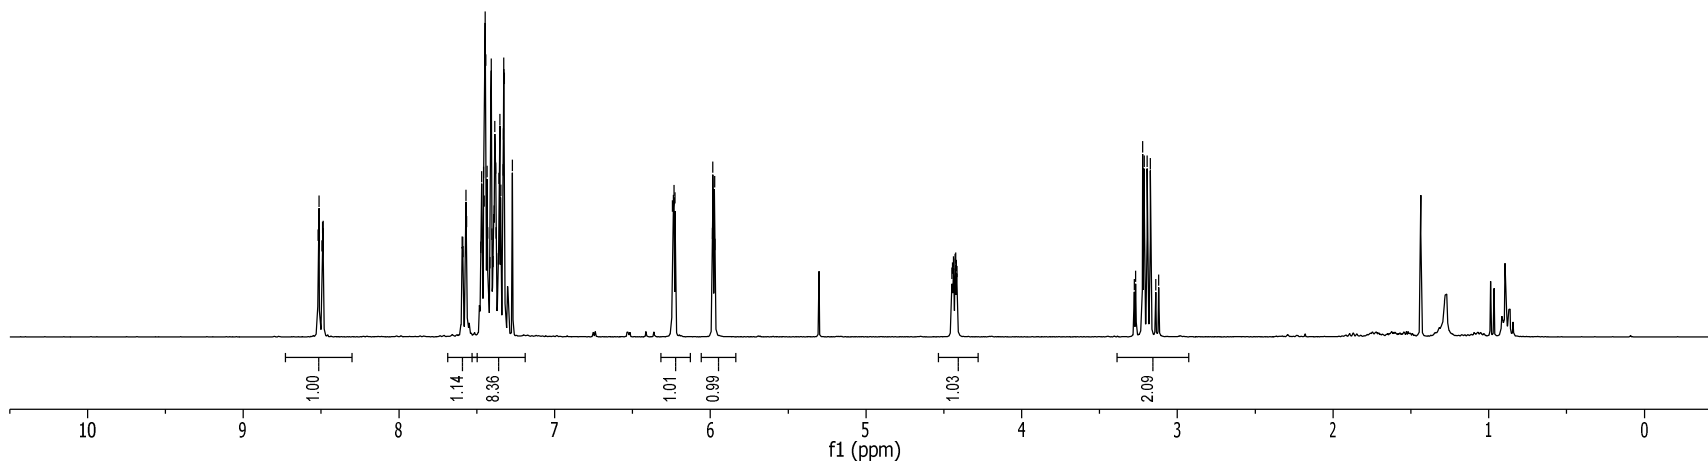

Supporting Information

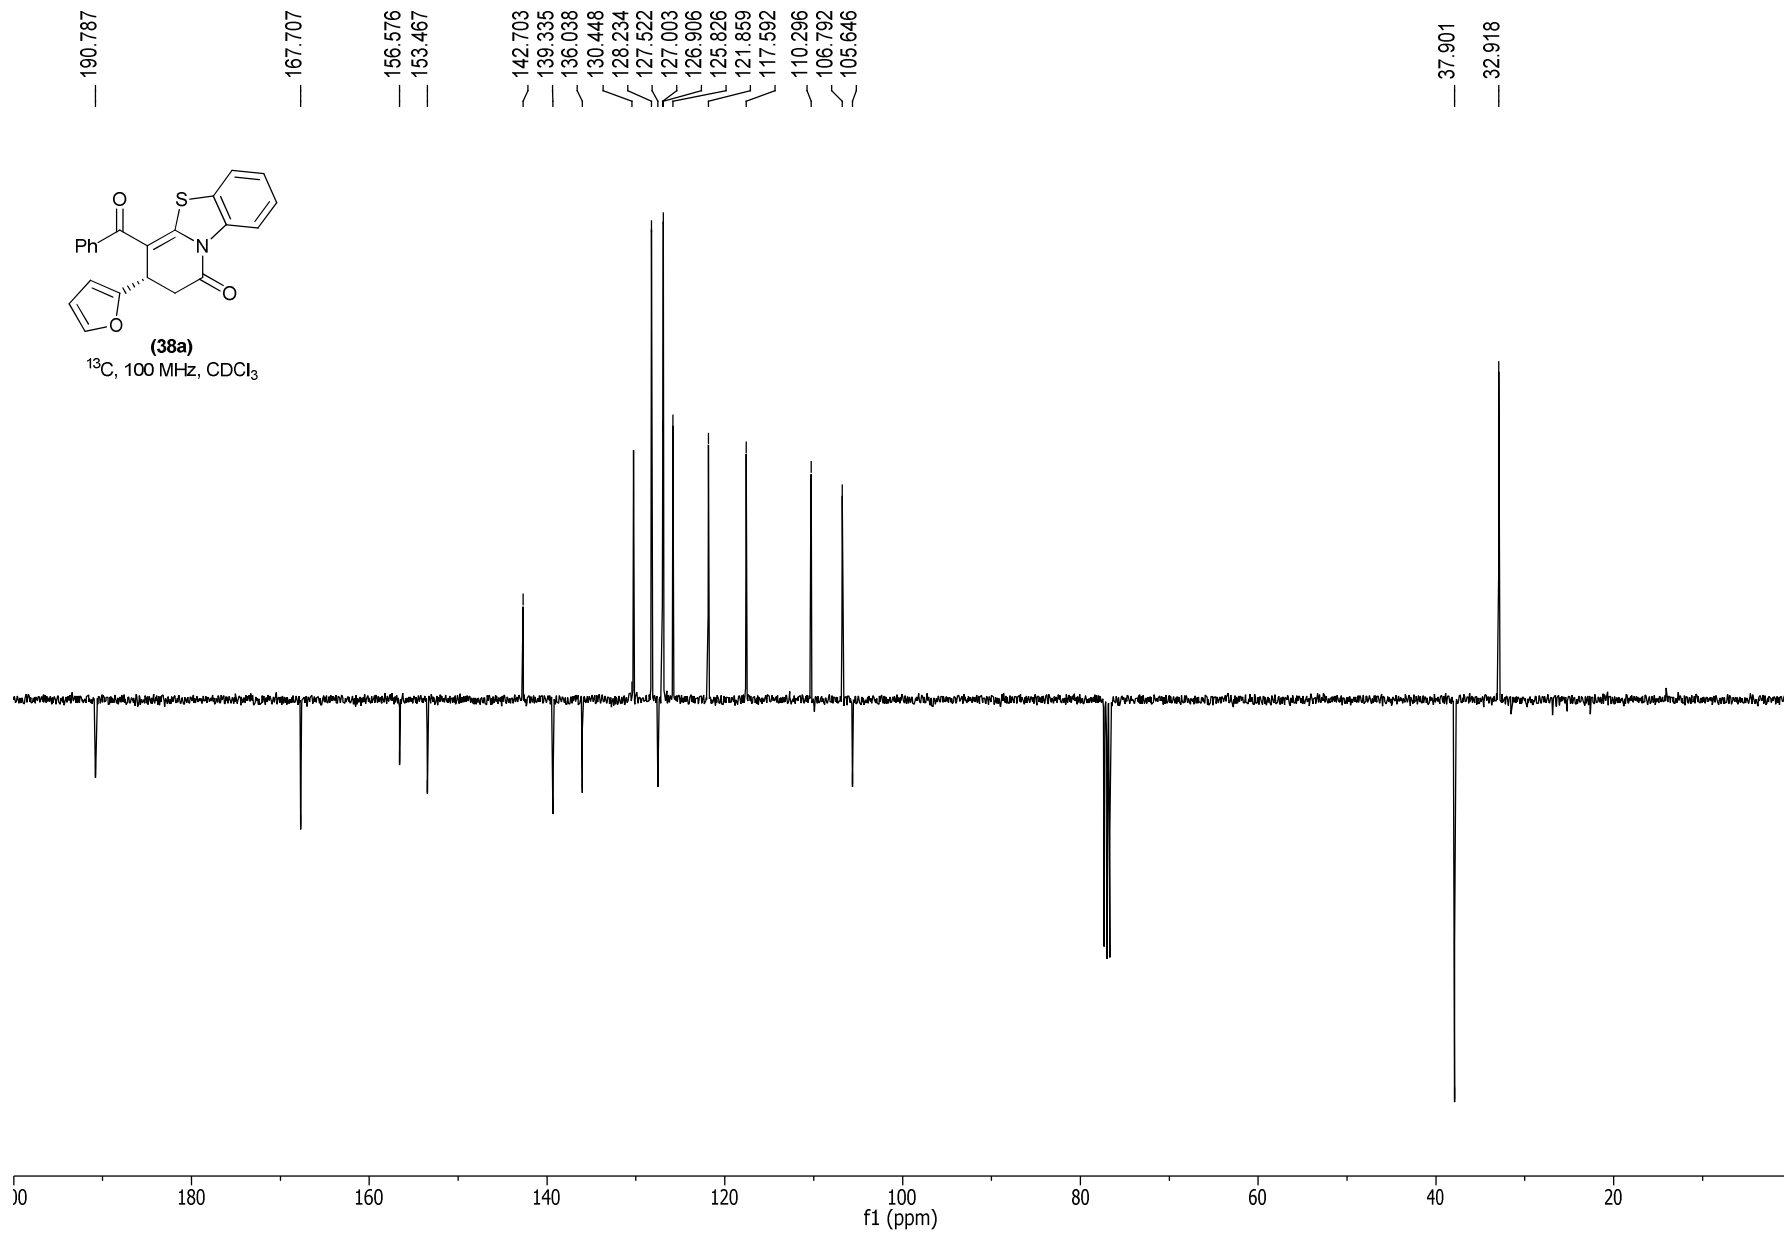

Supporting Information

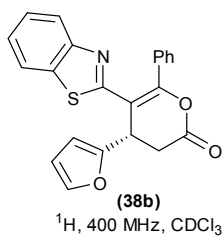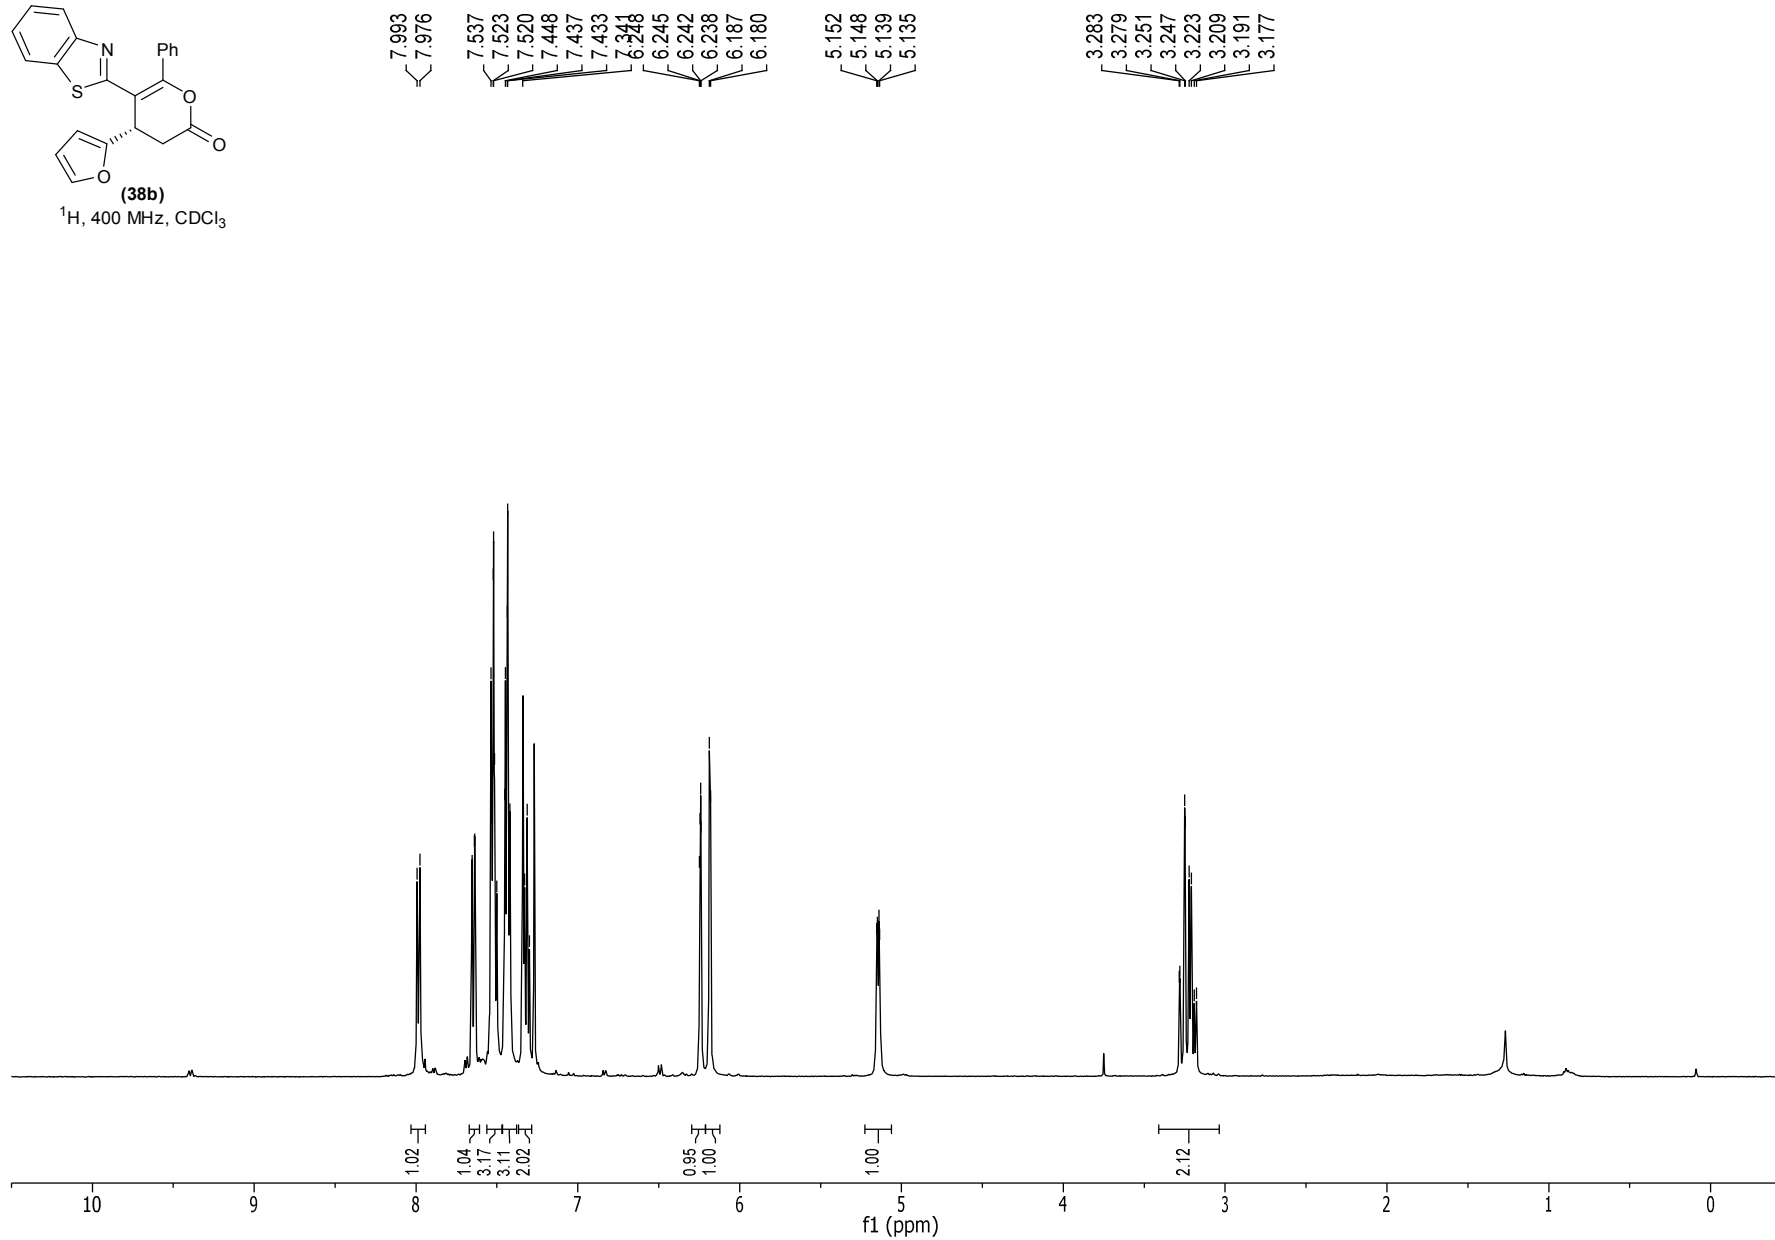

Supporting Information

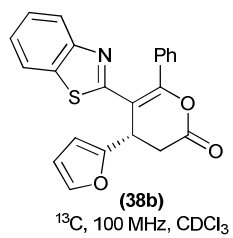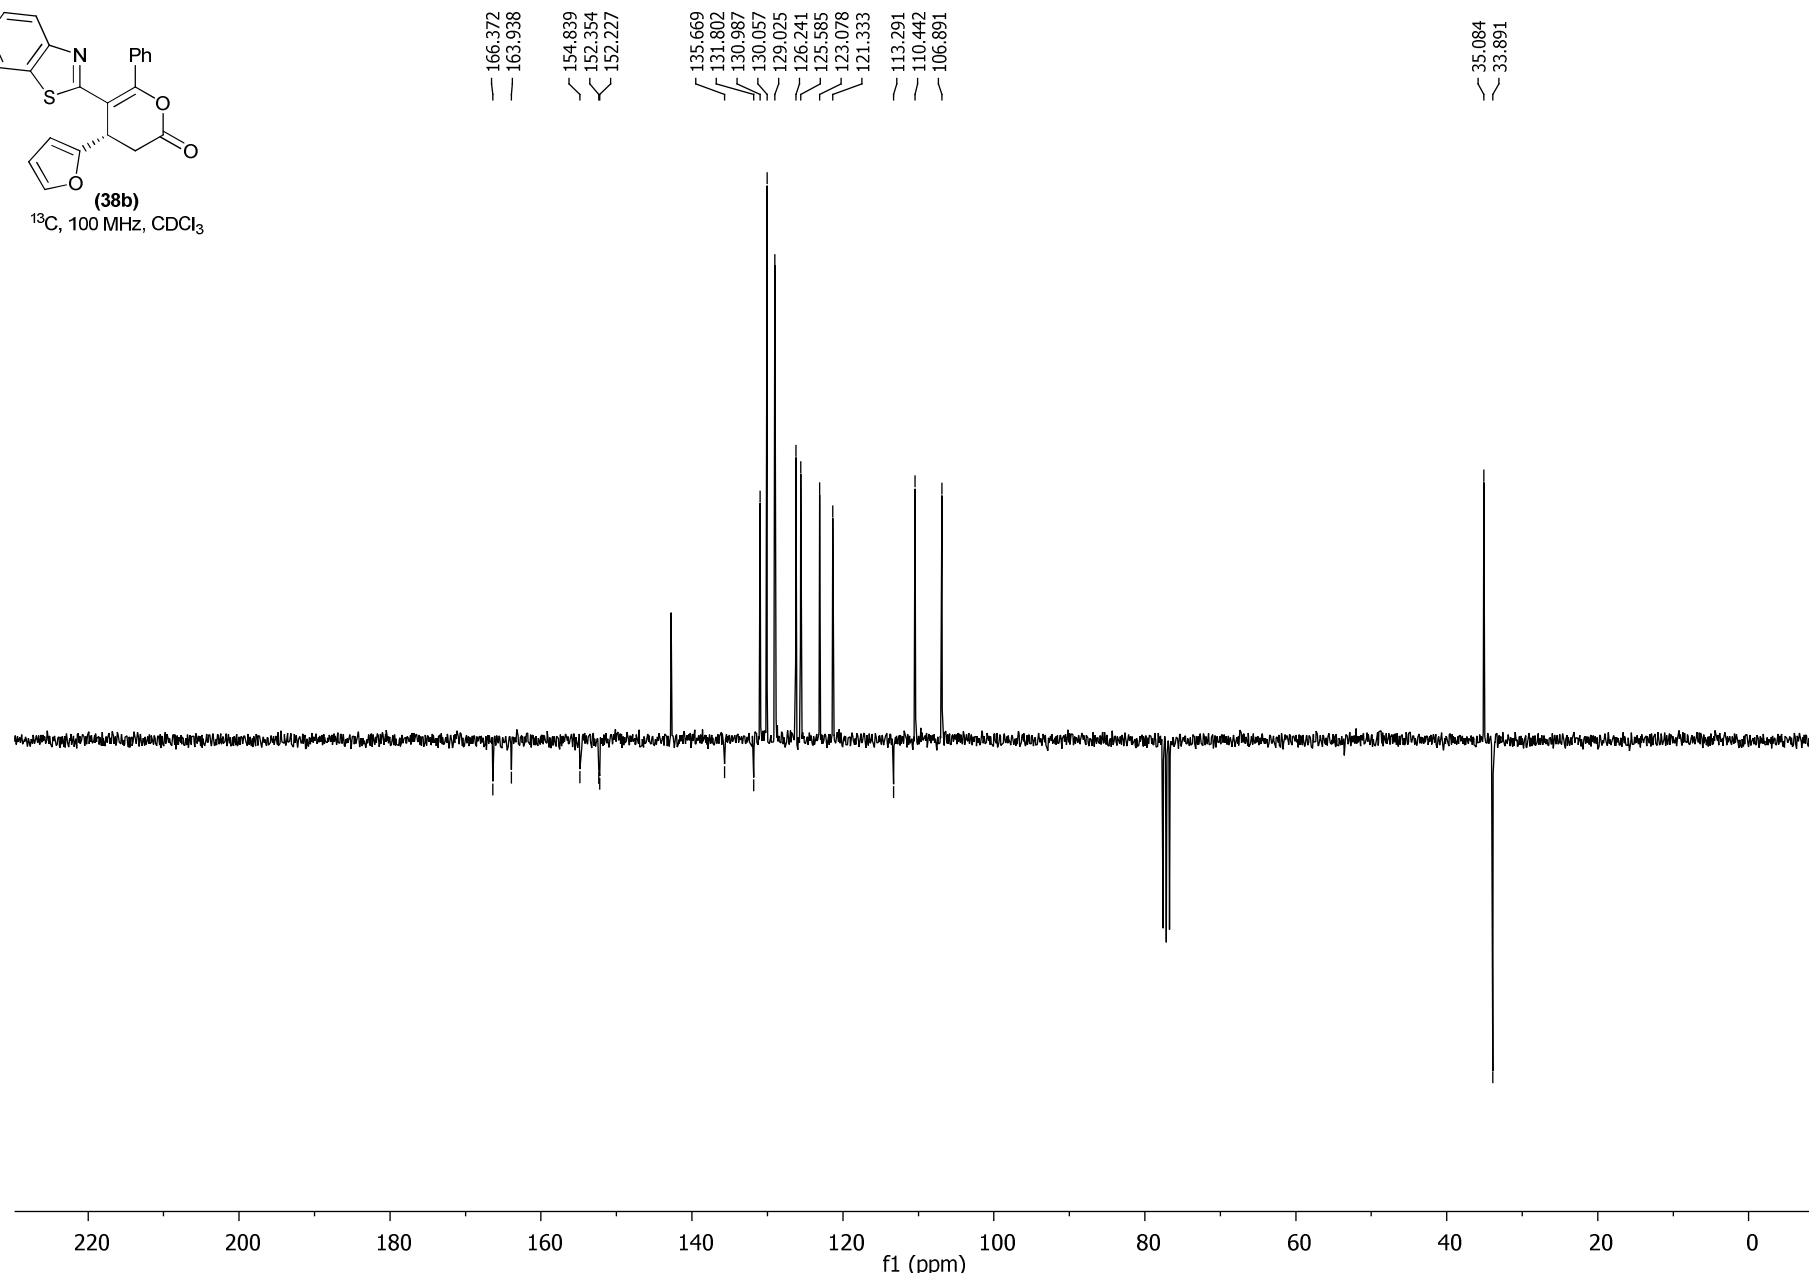

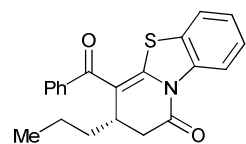

(39a)

<sup>1</sup>H, 400 MHz, CDCl<sub>3</sub>

7.528  
7.513  
7.498  
7.494  
7.489  
7.483  
7.479  
7.451  
7.441  
7.426  
7.416  
7.357  
7.342  
7.328  
7.325  
7.296  
7.281  
7.266

3.232  
3.229  
3.218  
3.215  
3.202  
3.191  
3.188  
3.063  
3.051  
3.031  
3.019  
2.868  
2.864  
2.835  
2.832  
1.406  
1.390  
1.375  
1.361  
1.143  
1.128  
1.113  
1.109  
1.094  
0.677  
0.634  
0.619

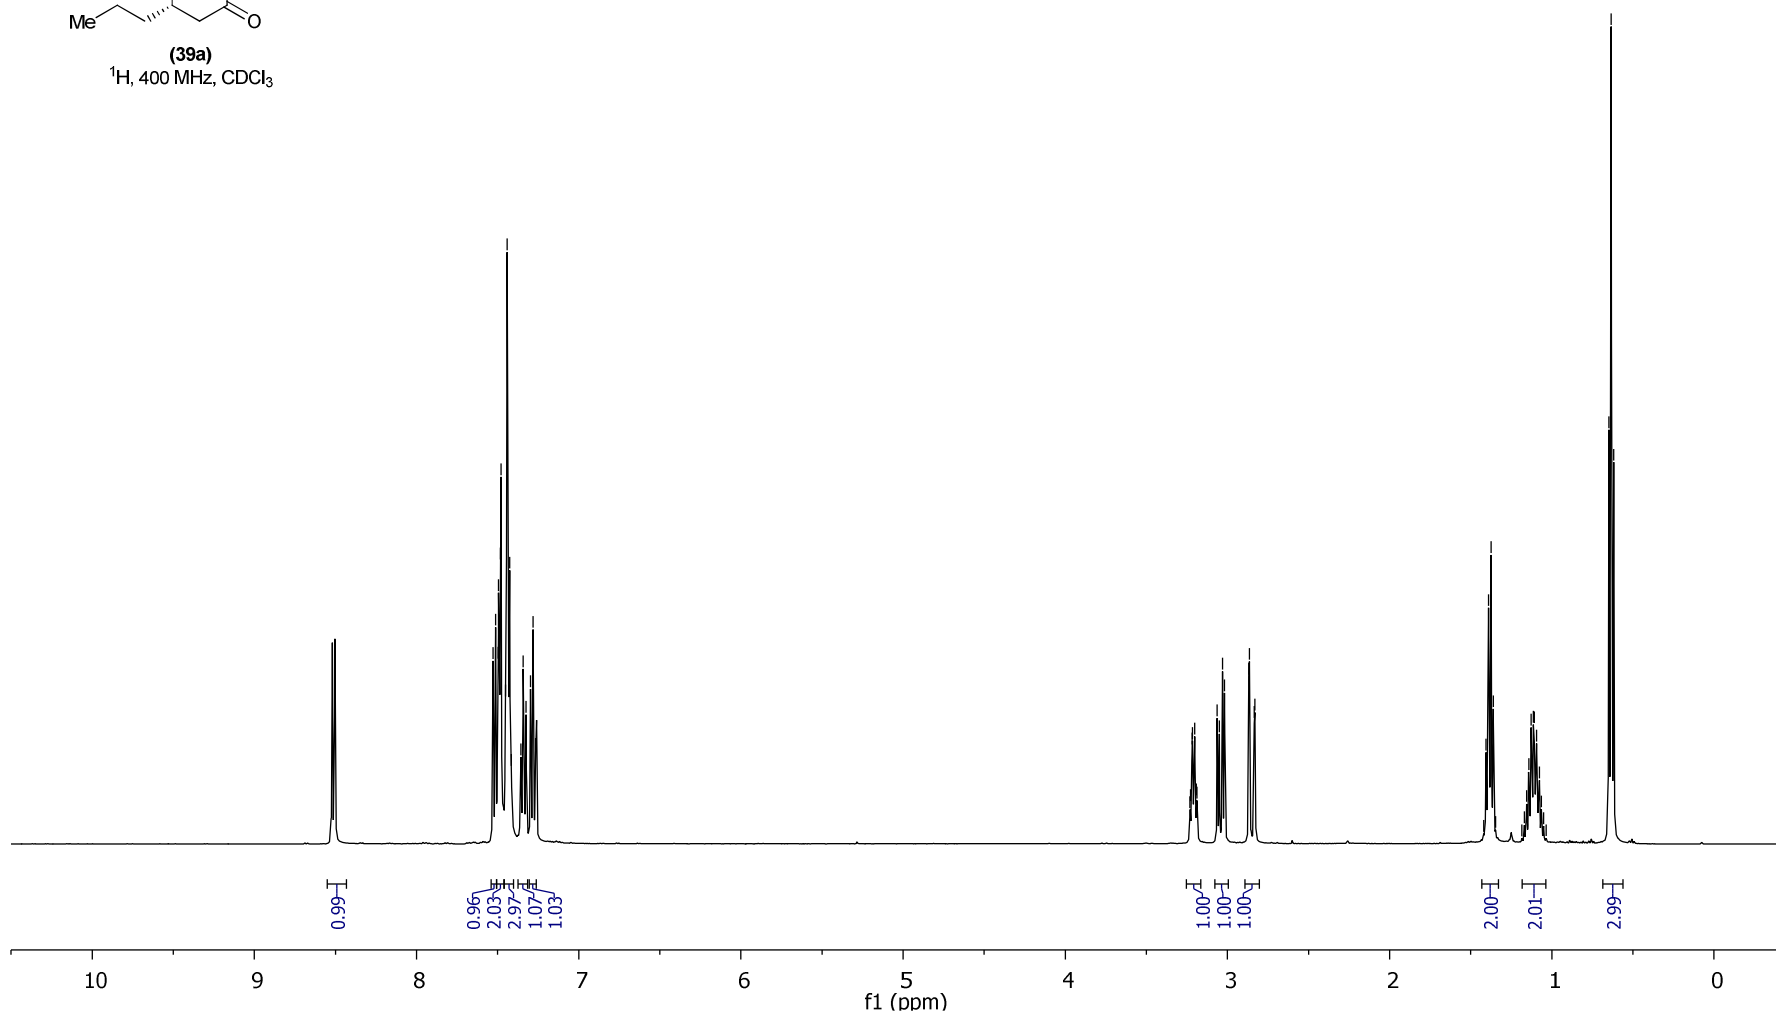

Supporting Information

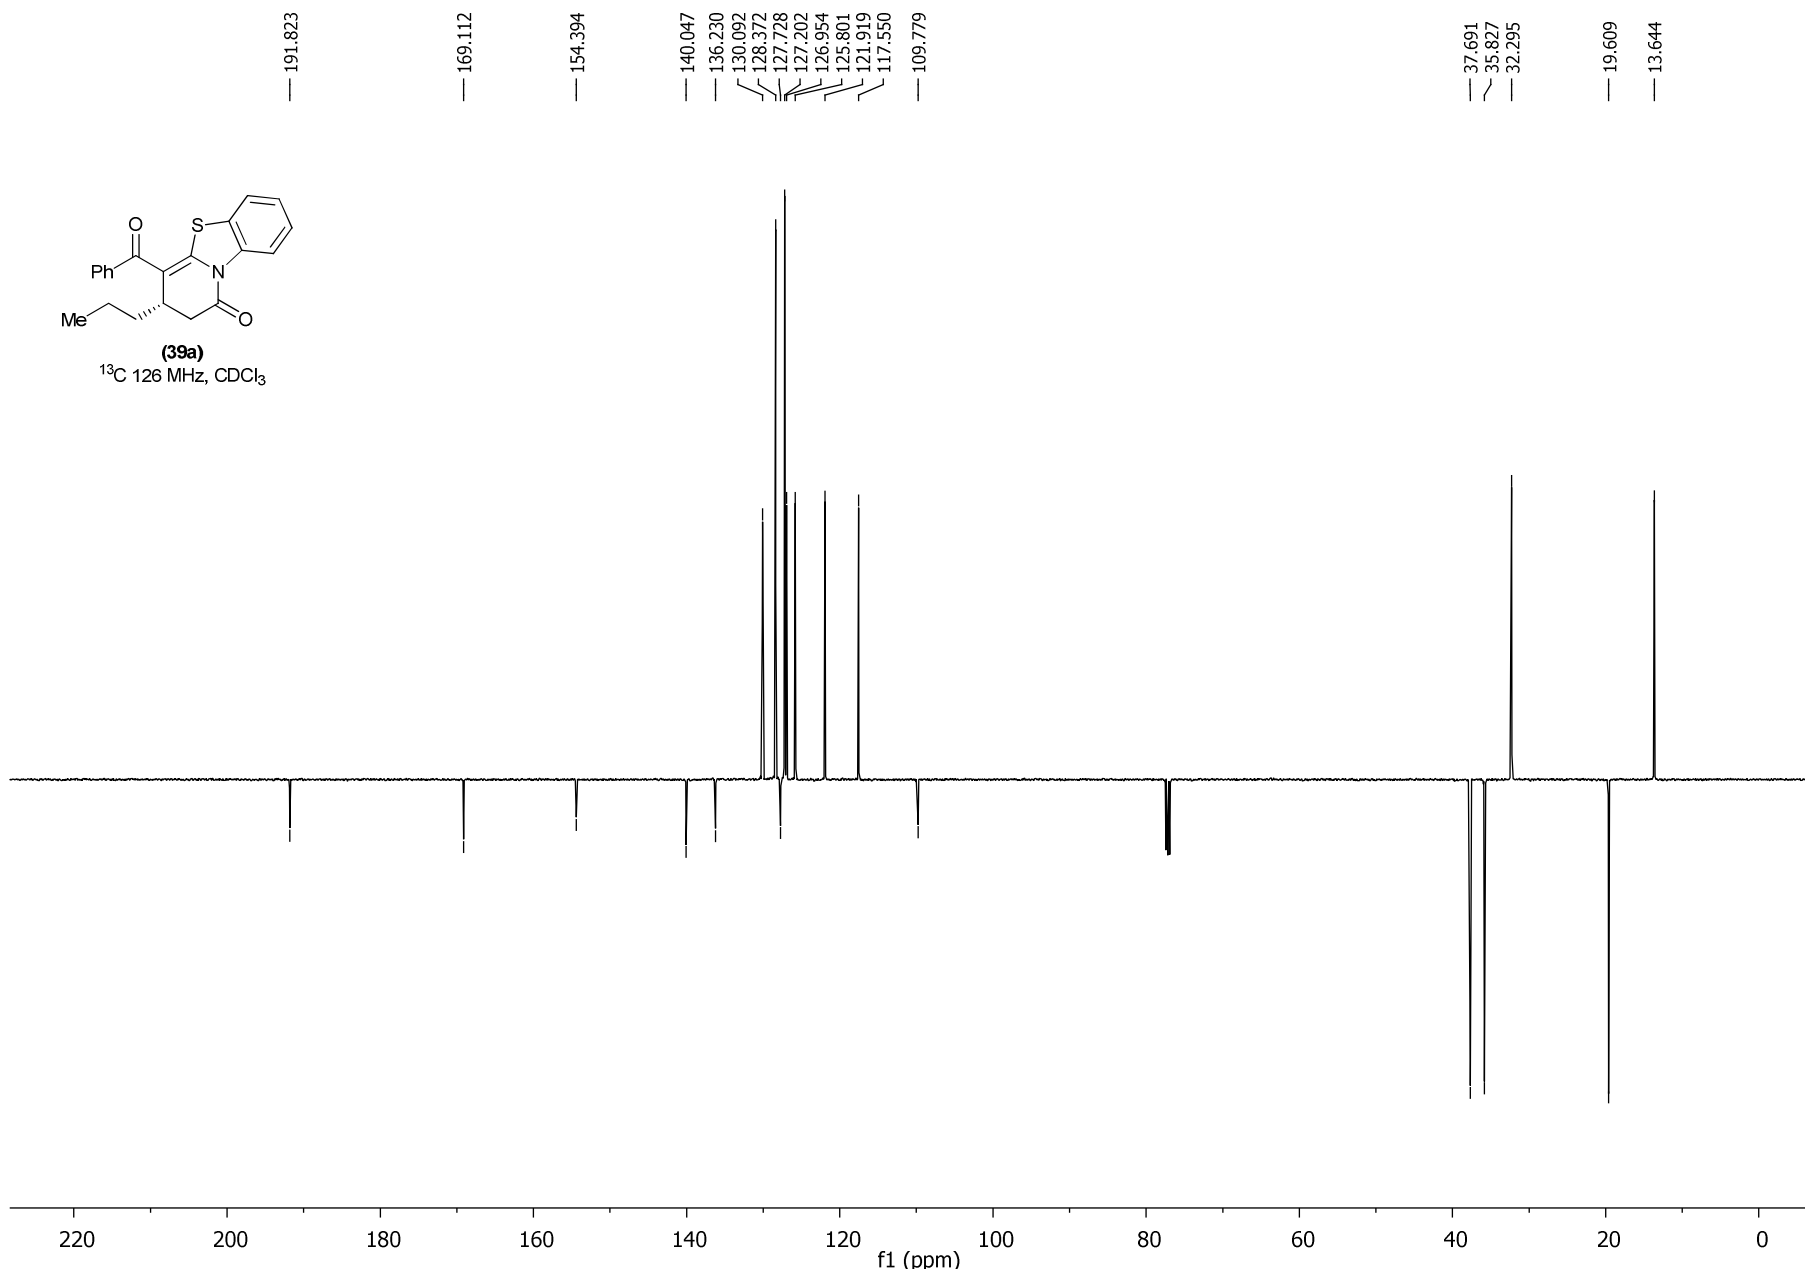



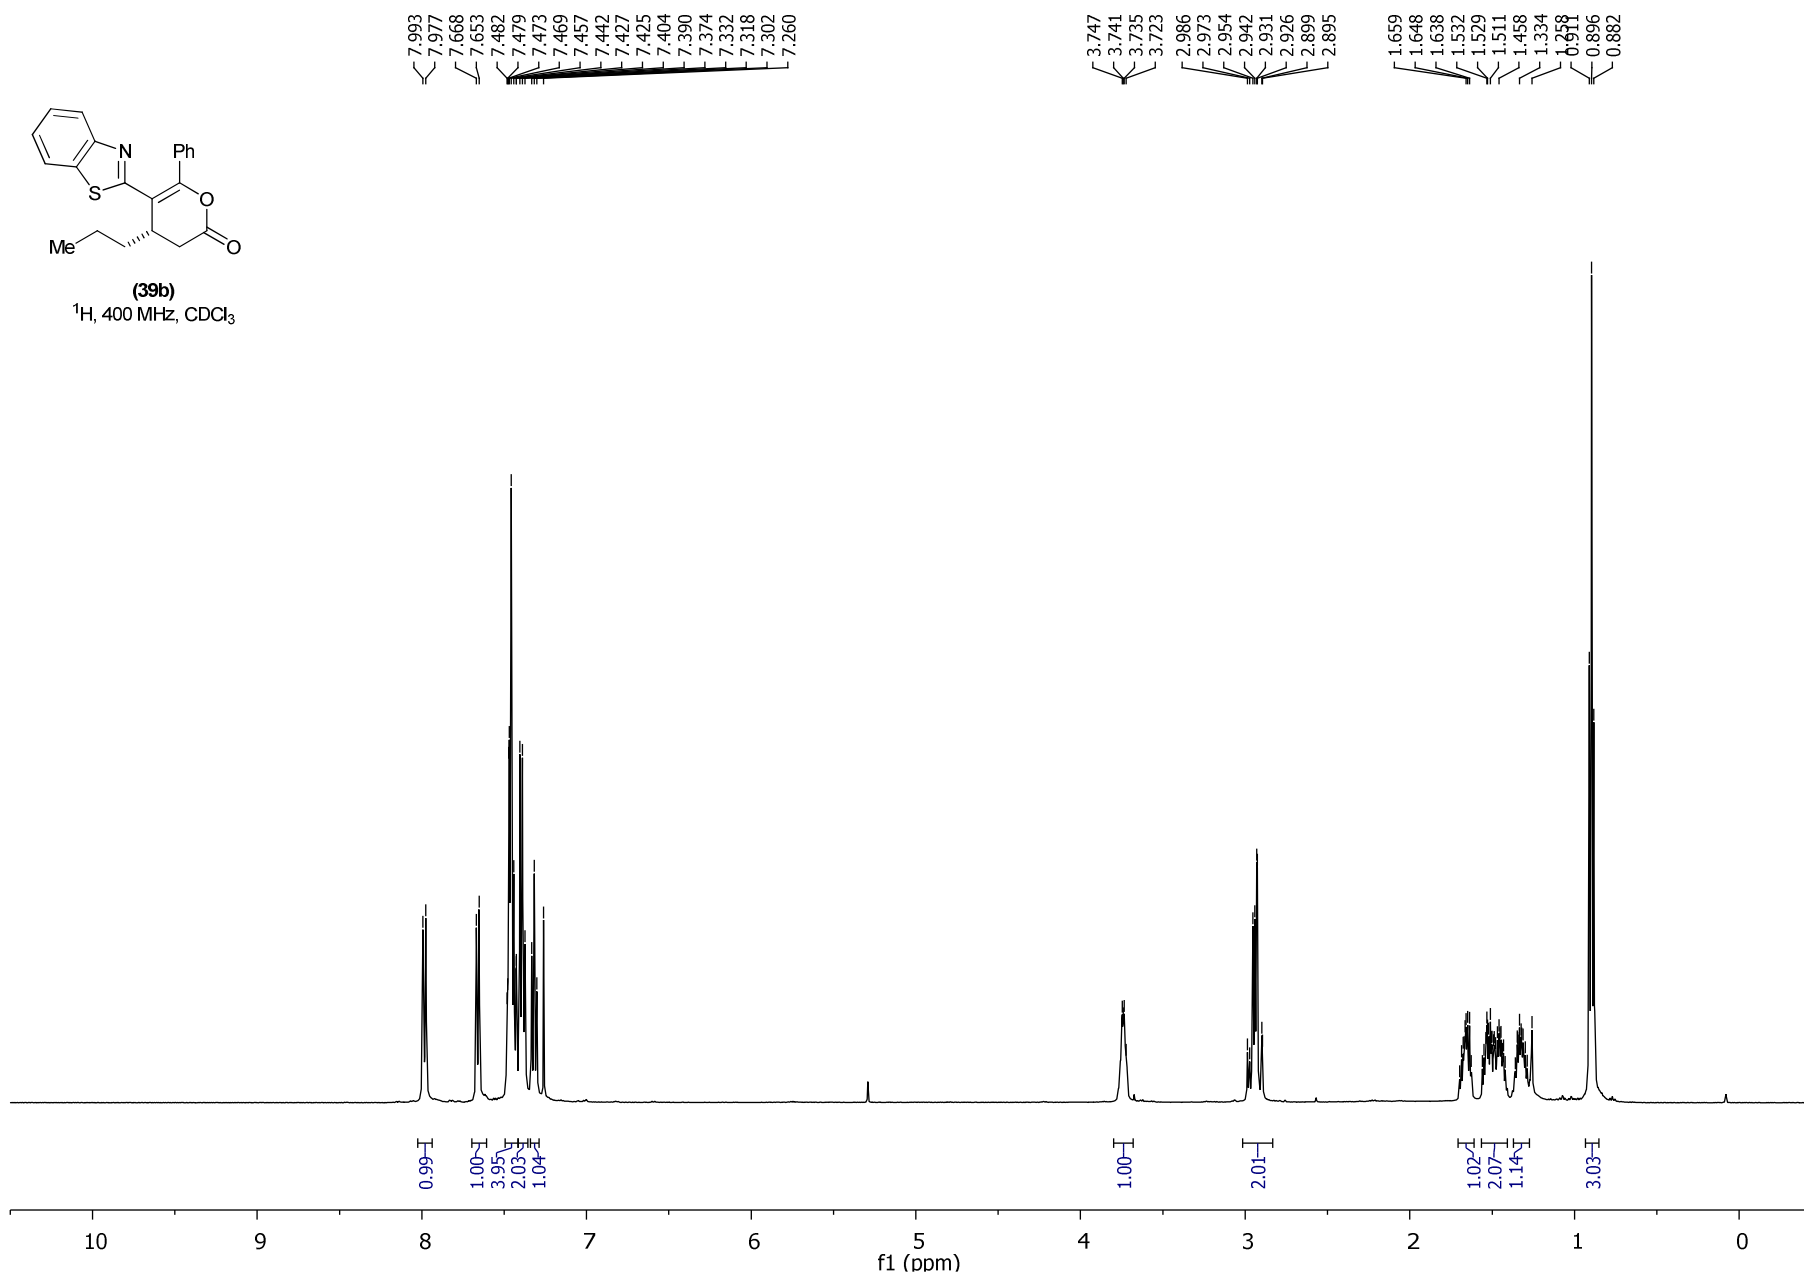

Supporting Information

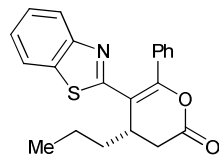

**(39b)**  
 $^{13}\text{C}$ , 126 MHz,  $\text{CDCl}_3$

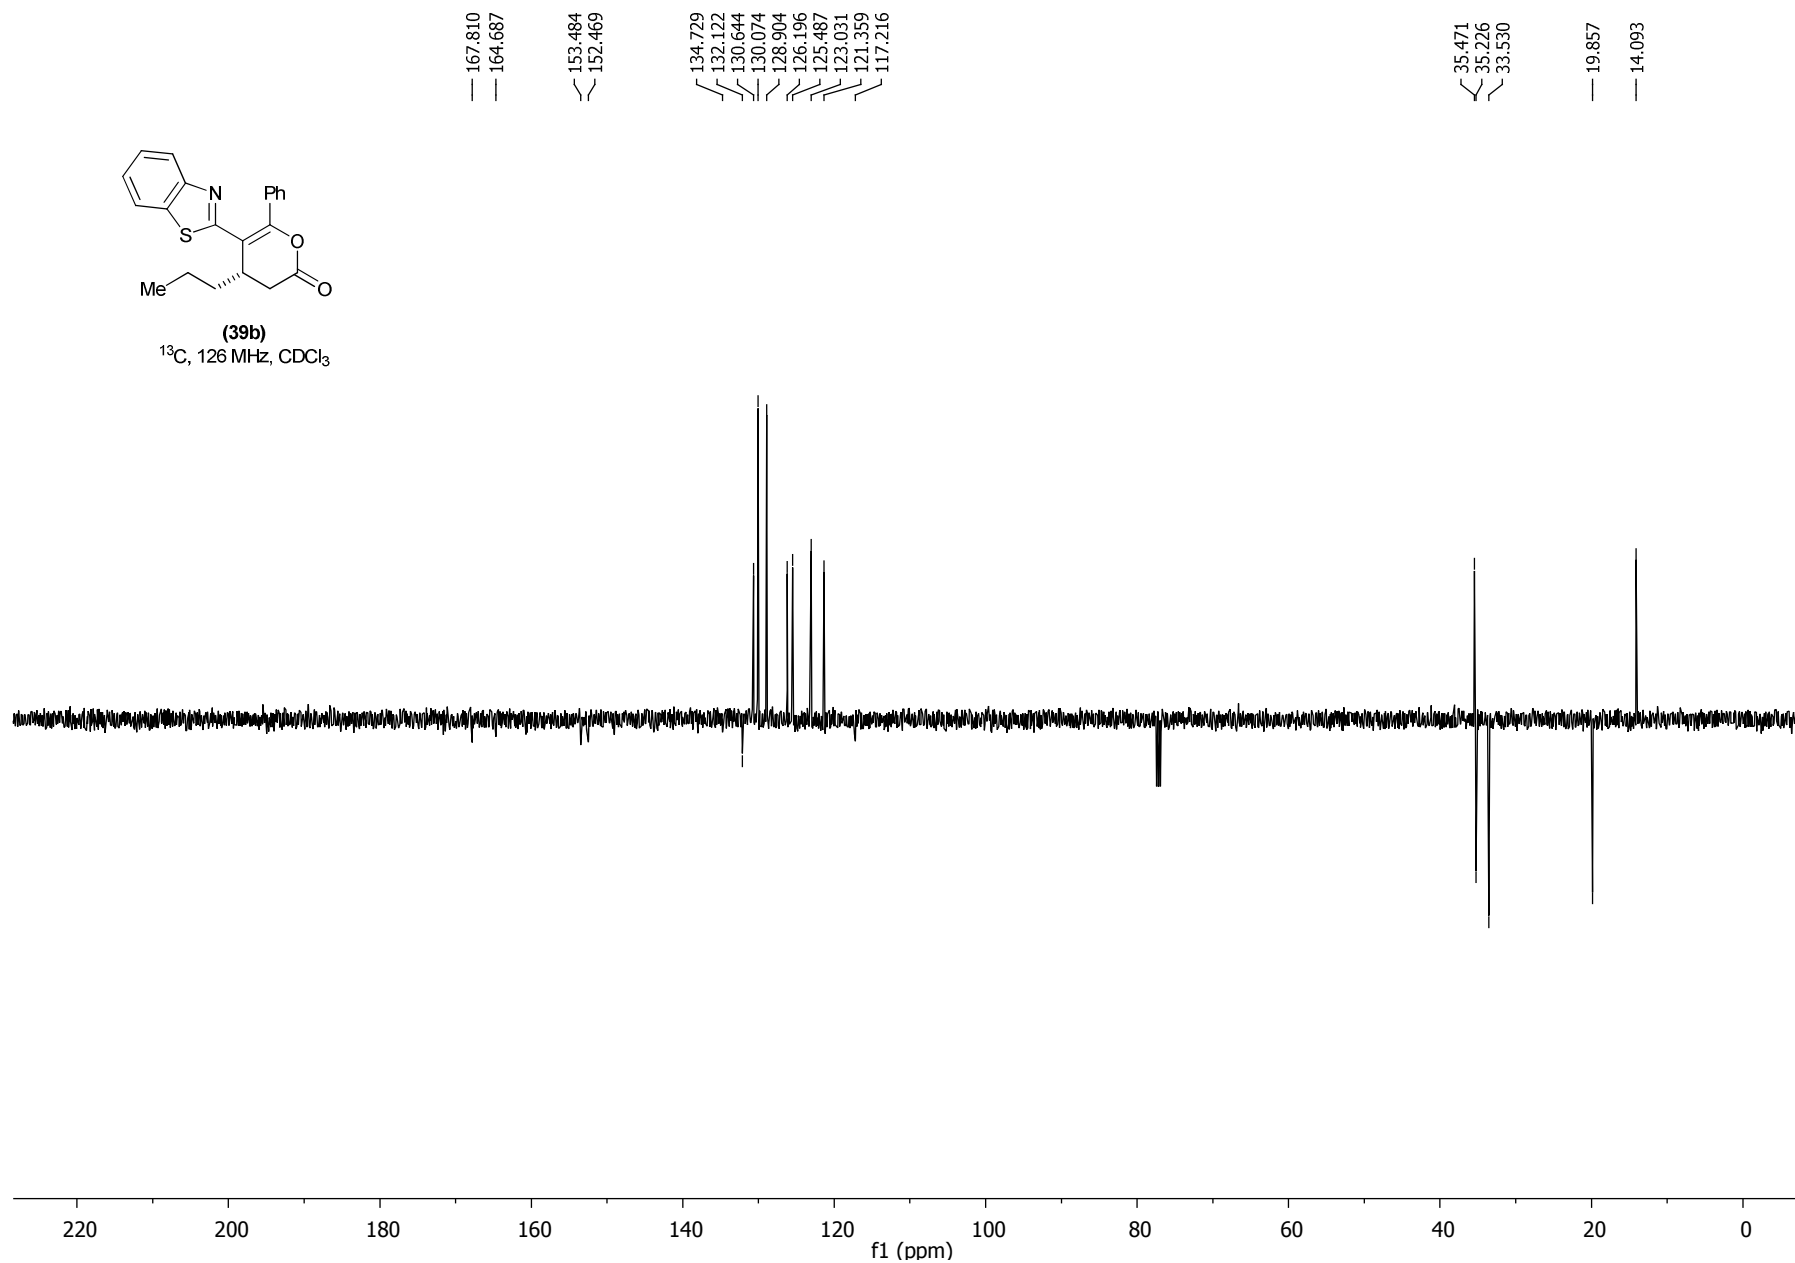

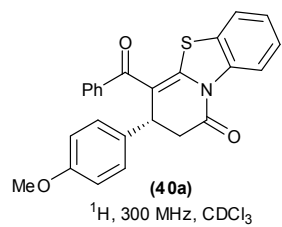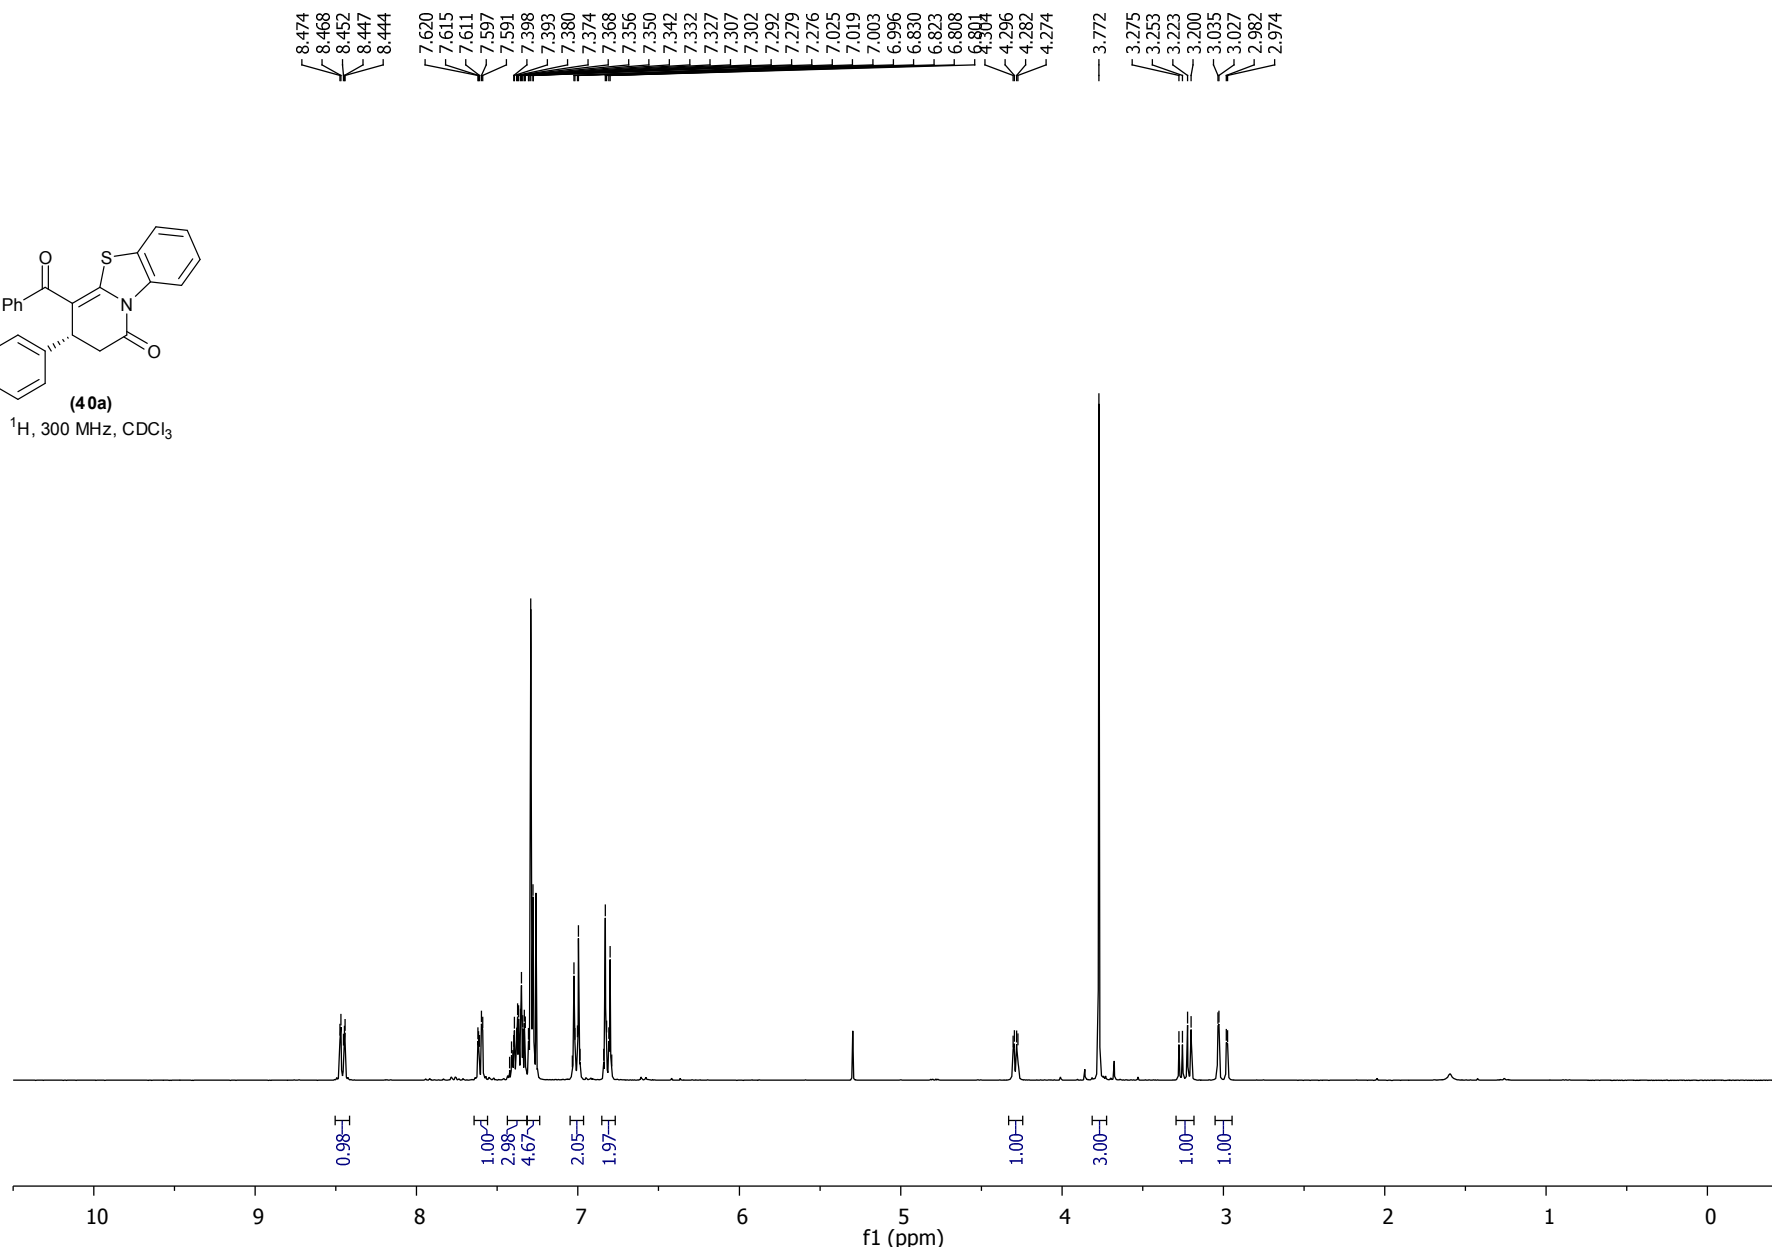

Supporting Information

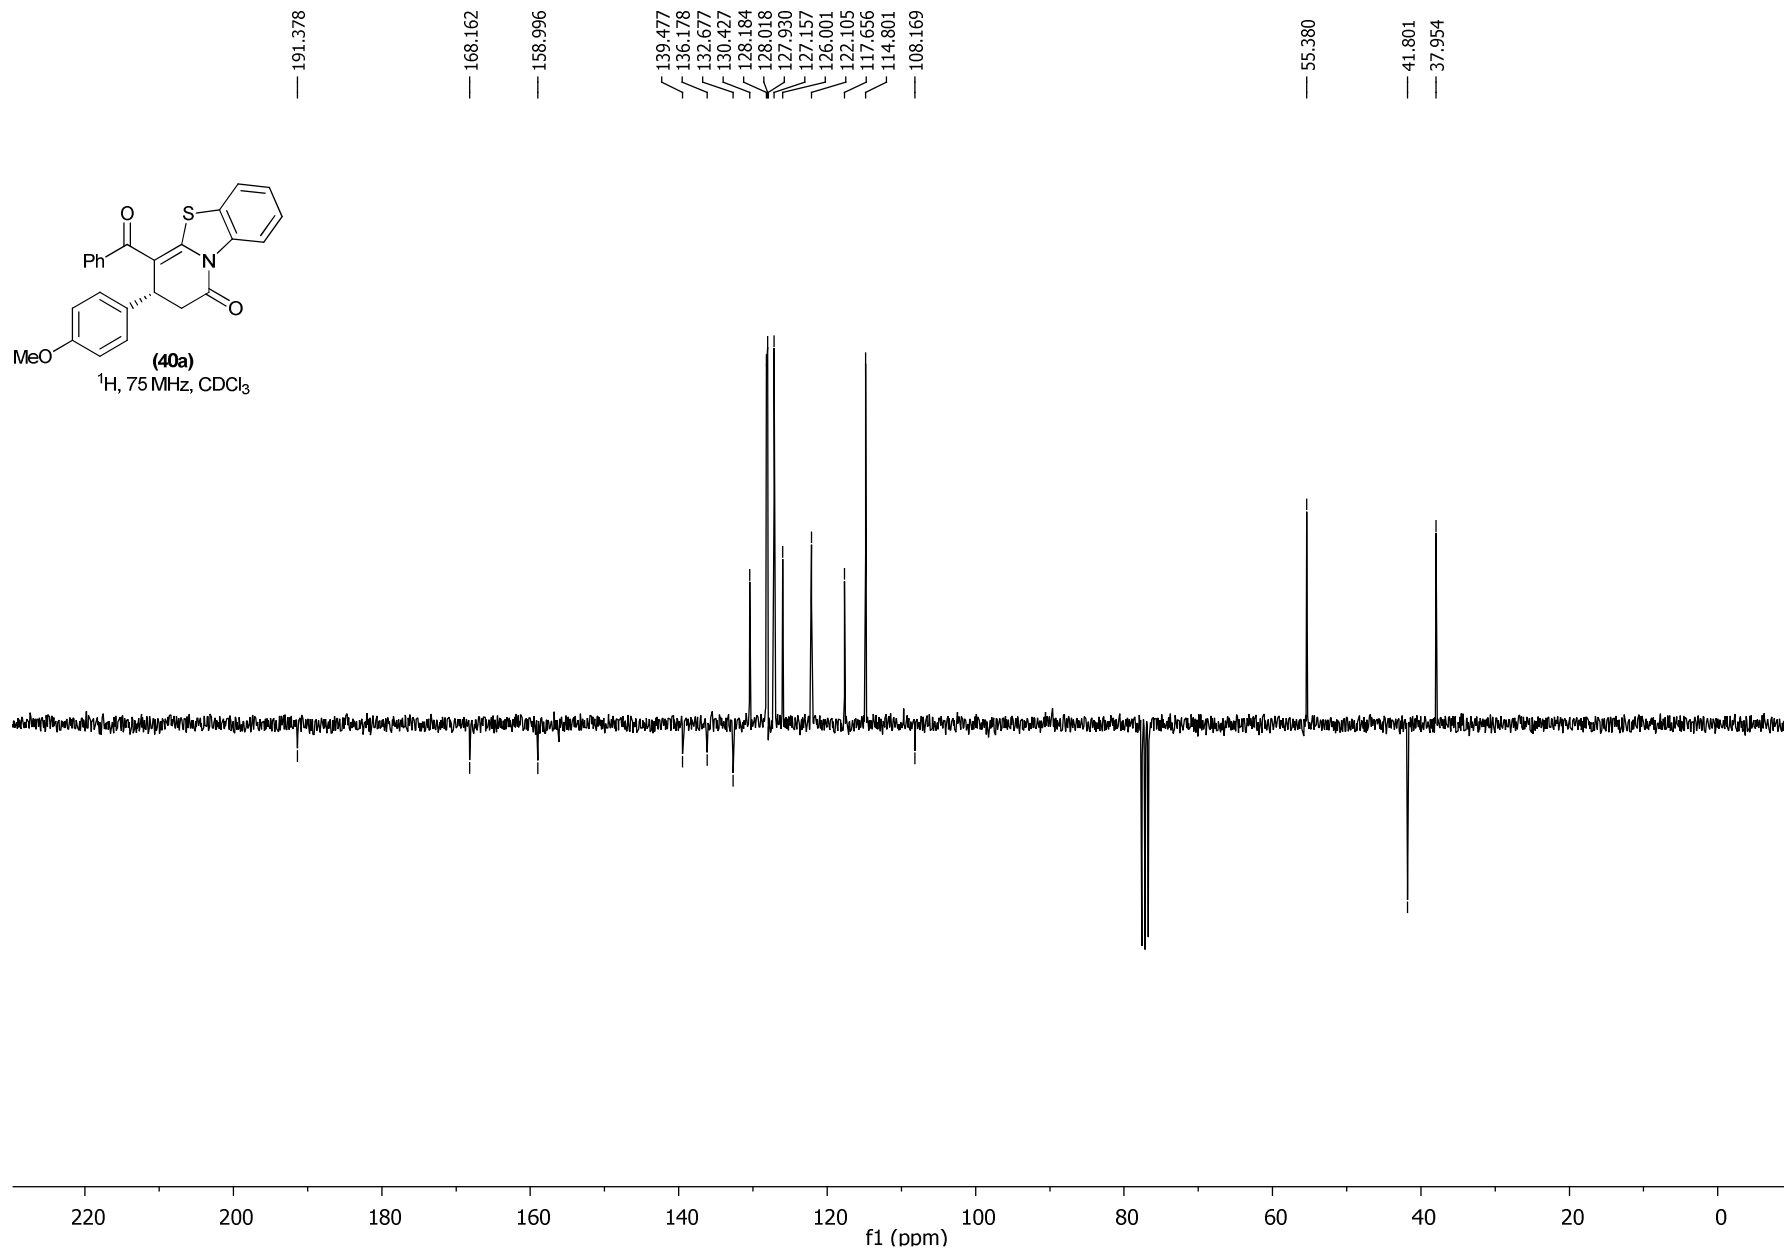

Supporting Information

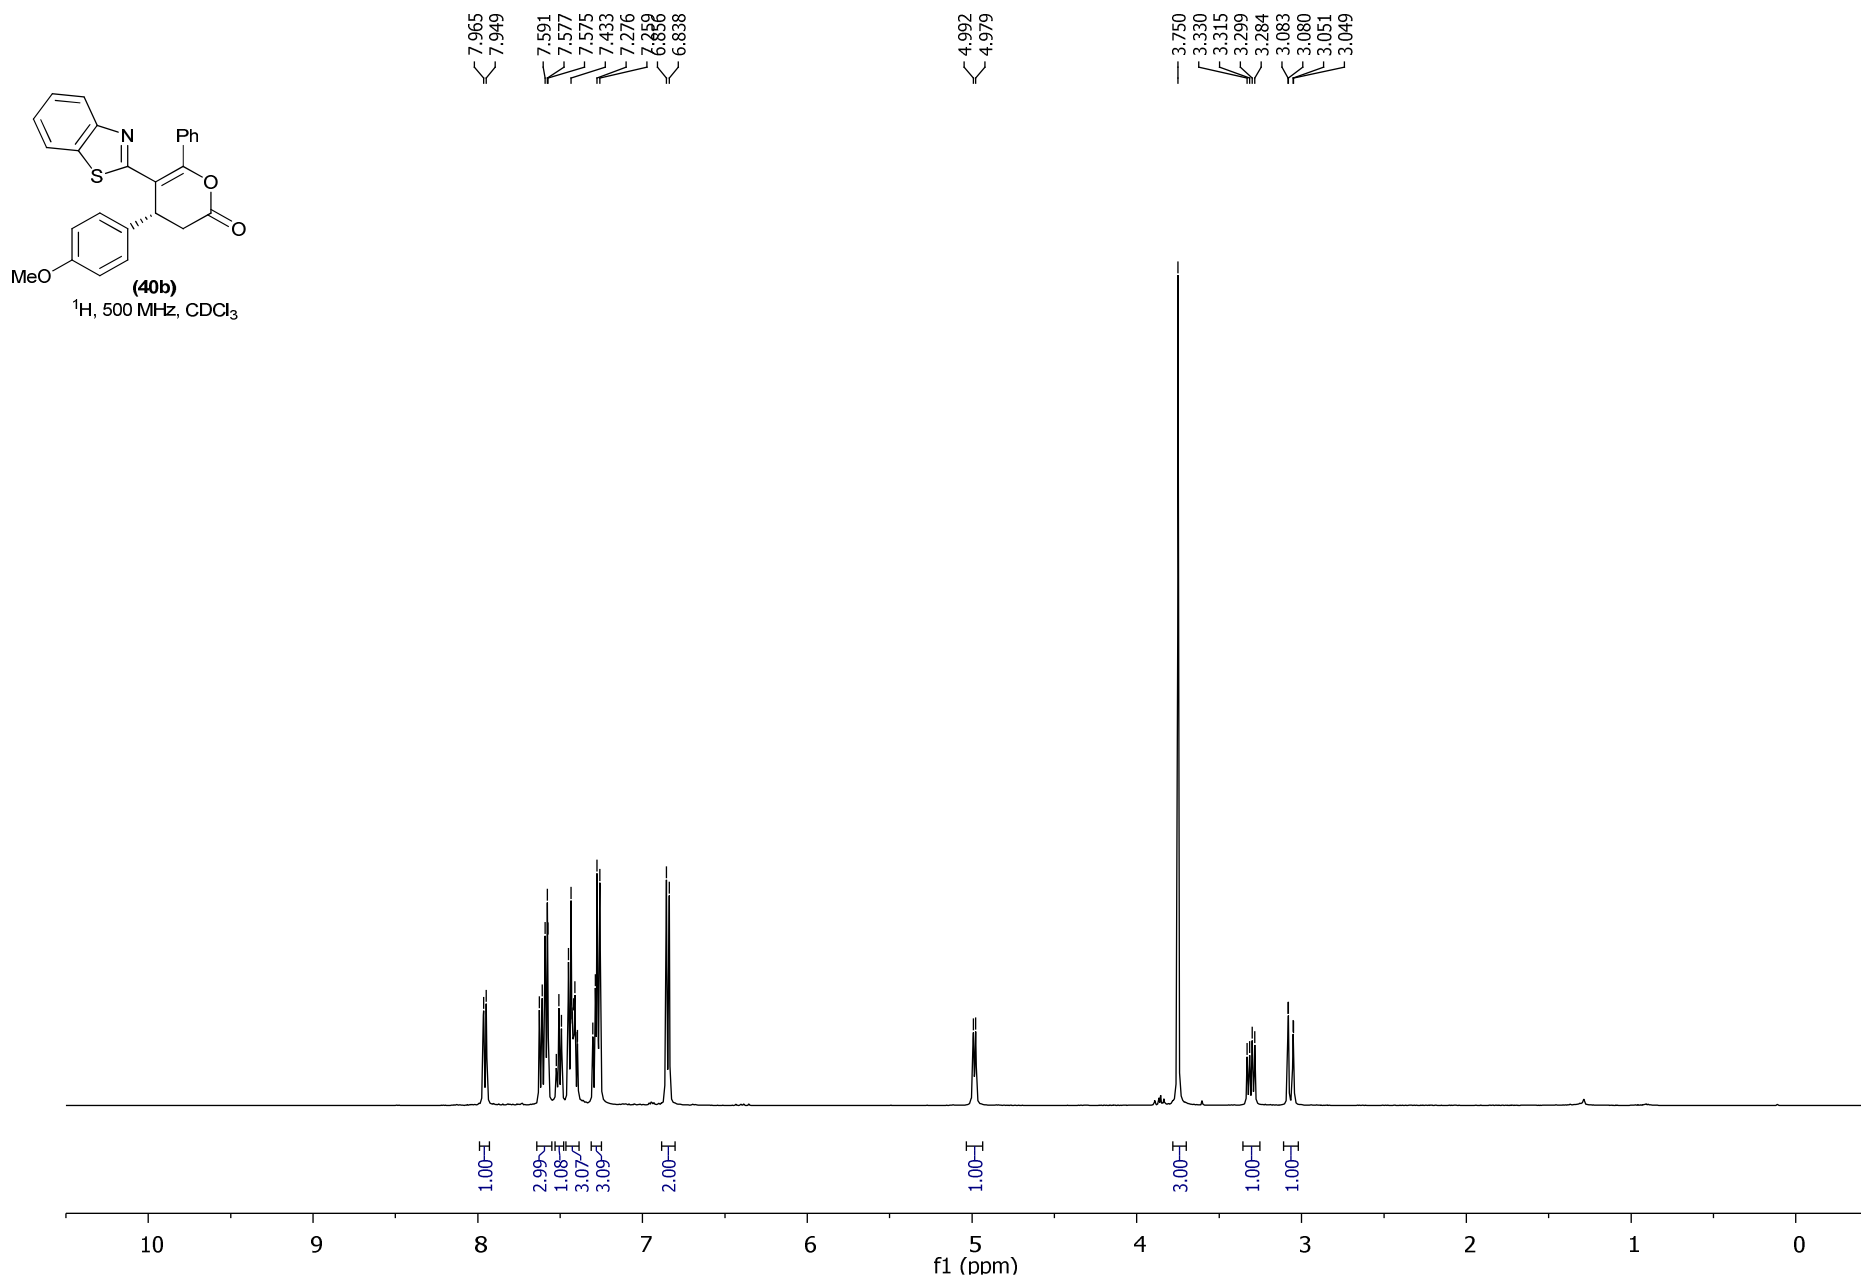

Supporting Information

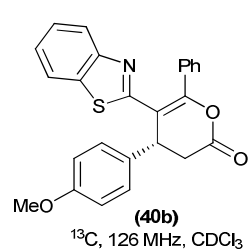

166.758  
164.407  
159.109  
154.239  
152.259  
138.231  
130.835  
130.061  
128.940  
128.153  
125.509  
123.060  
121.318  
115.348  
114.645

55.326

40.595  
37.162

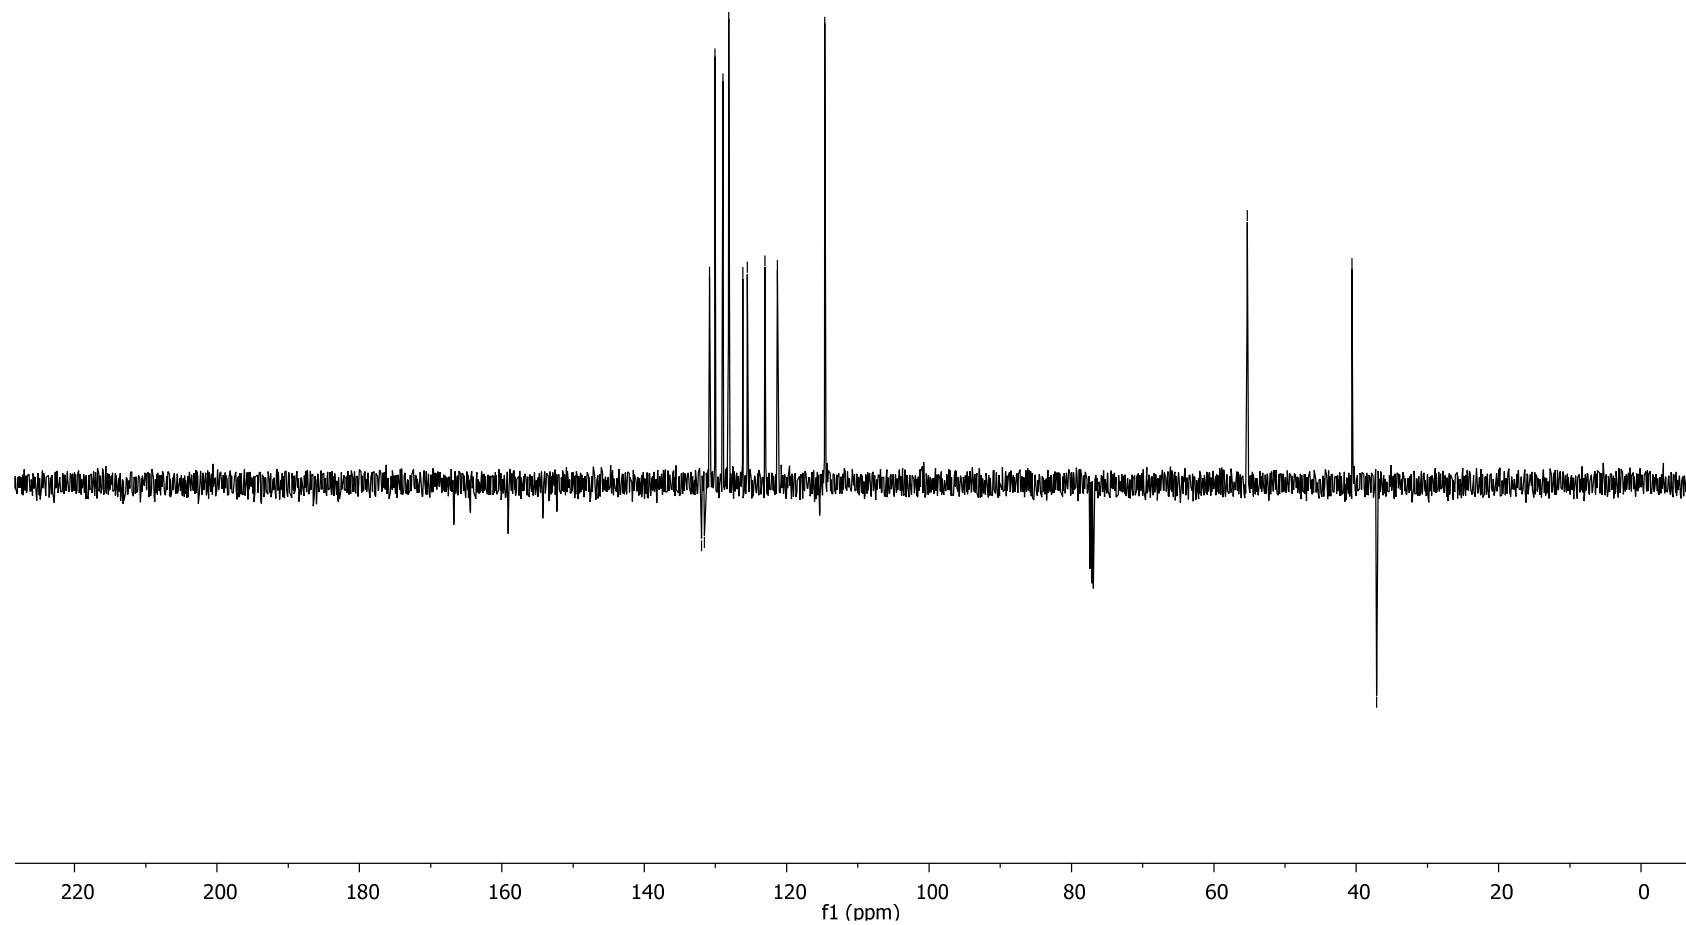

Supporting Information

7.962  
7.939  
7.933  
7.870  
7.817  
7.558  
7.551  
7.546  
7.534  
7.449  
7.444  
7.428  
7.427  
7.410  
7.399  
7.386  
7.377  
7.371  
7.365  
7.270  
6.691  
6.638

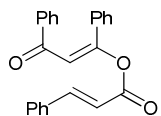

(50)

<sup>1</sup>H, 400 MHz, CDCl<sub>3</sub>

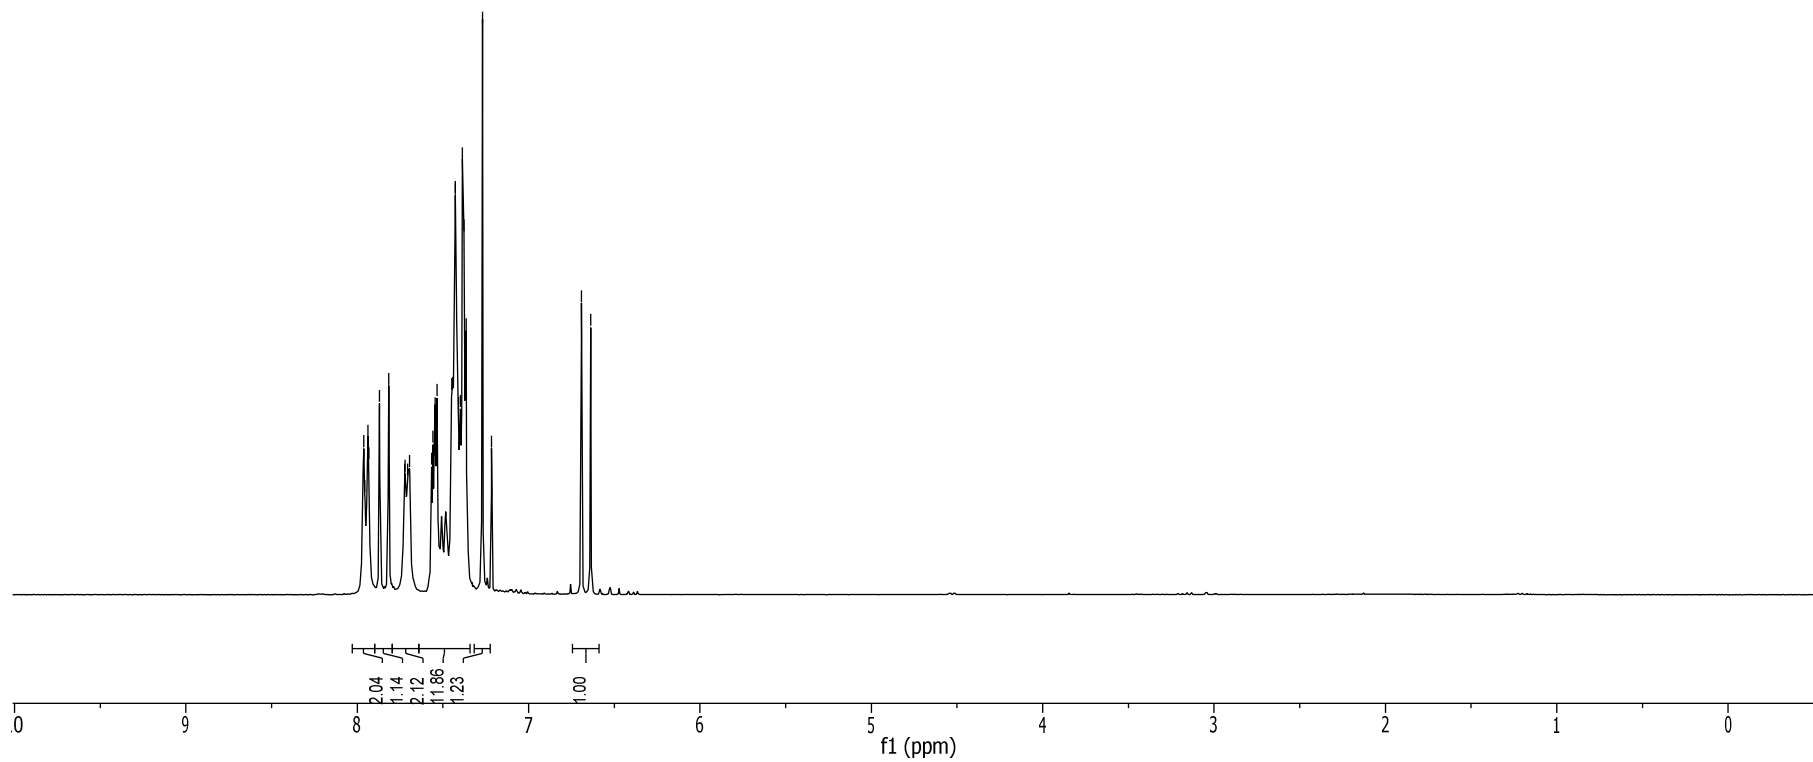

Supporting Information

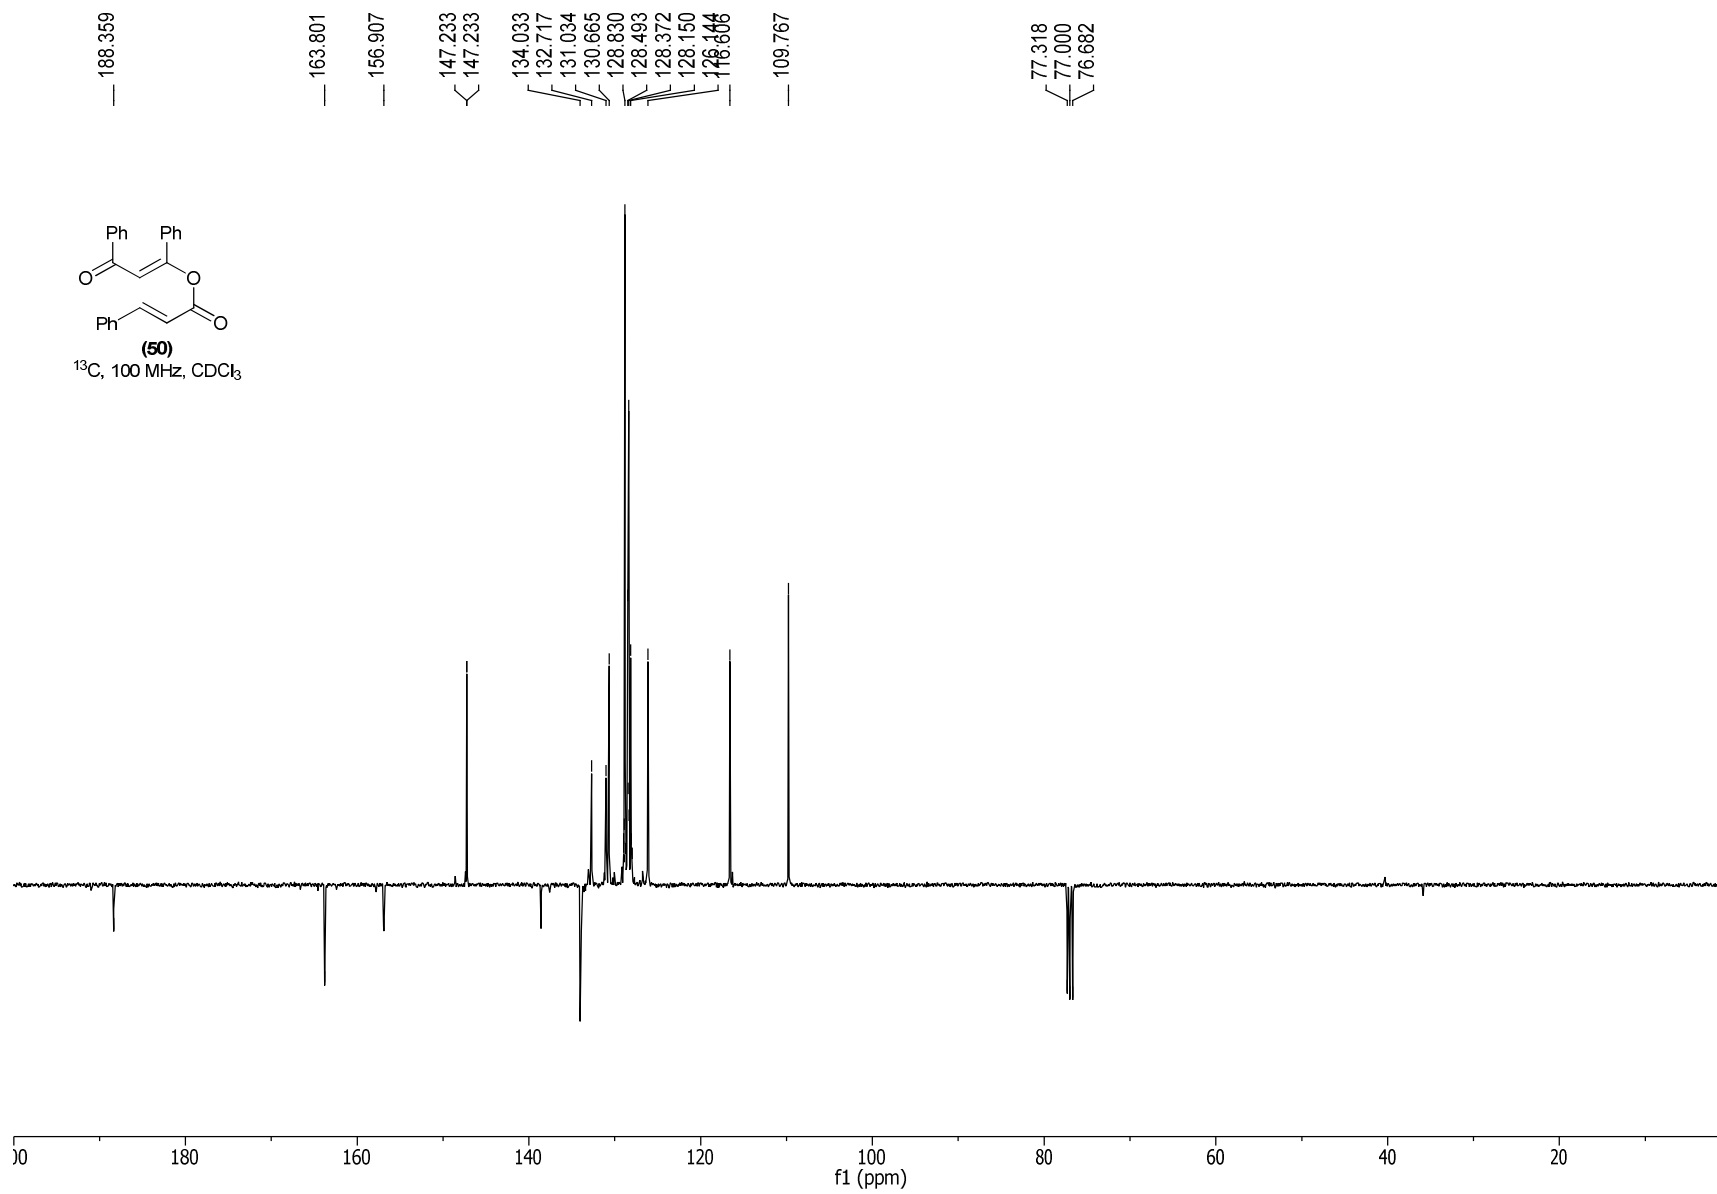



Supporting Information

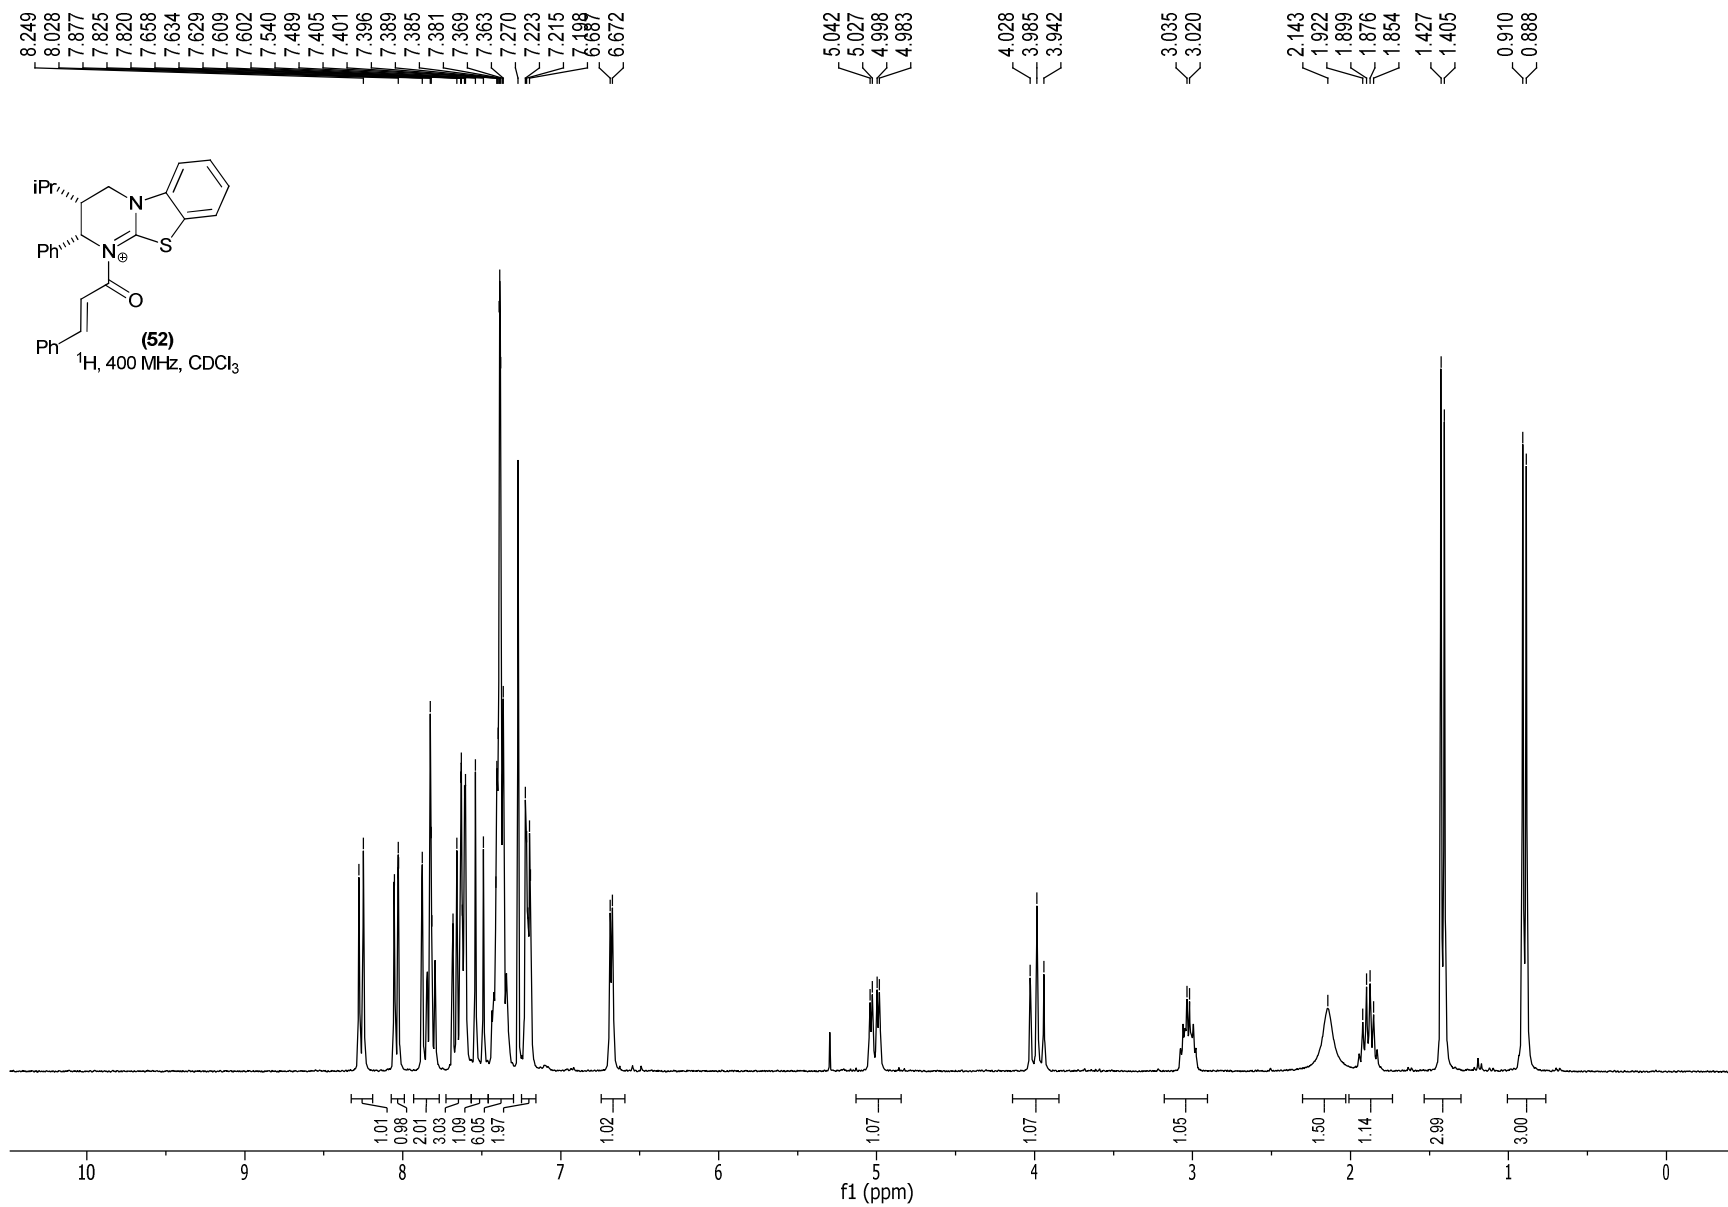

Supporting Information

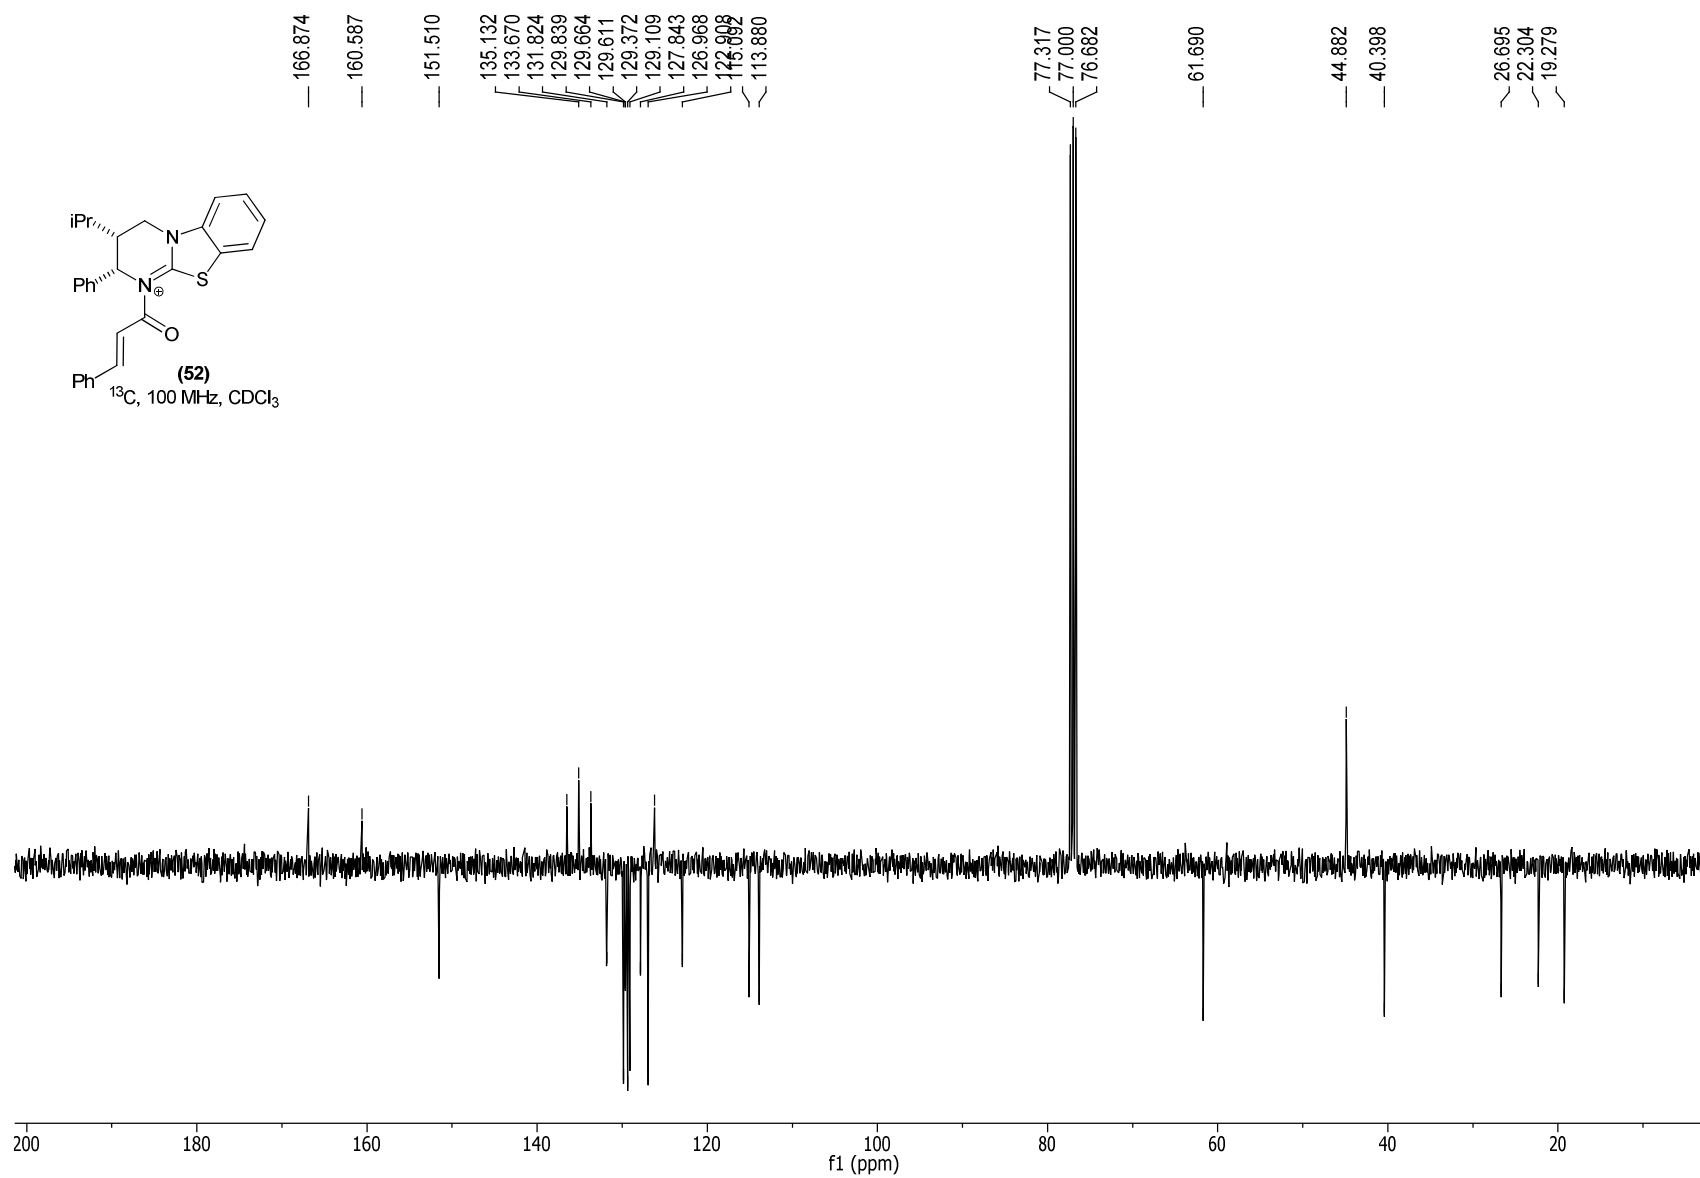

## References

- 
- <sup>1</sup> J. Cabré-Castellví, A. Palomo-Coll and A. L. Palomo-Coll, *Synthesis*, 1981, **8**, 616–620
- <sup>2</sup> N. Armesto, M. Ferrero, S. Fernandez and V. Gotor, *J. Org. Chem.*, 2003, **68**, 5784–5787
- <sup>3</sup> K. S. Keshavamurthy, Y. D. Vankar, and D. N. Dhar, *Synthesis*, 1982, **6**, 506–508
- <sup>4</sup> R. Shen, T. Chen, Y. Zhao, R. Qiu, Y. Zhou, S. Yin, X. Wang, M. Goto and L. B. Han, *J. Am. Chem. Soc.*, 2011, **133**, 17037–17044
- <sup>5</sup> K. Cheng, Y. S. Lee, R. B. Rothman, C. M. Dersch, R. W. Bittman, A. E. Jacobson and K. C. Rice, *J. Med. Chem.*, 2011, **54**, 957–969
- <sup>6</sup> K. Nomura, K. Asano, T. Kurahashi and S. Matsubara, *Heterocycles*, 2008, **76**, 1381–1399
- <sup>7</sup> W. Adam, H. M. Harrer, W. M. Nau and K. Peters, *J. Org. Chem.*, 1994, **59**, 3786–3797
- <sup>8</sup> T. Yamada, T. Nagata, K. D. Sugi, K. Yorozu; T. Ikeno, Y. Ohtsuka, D. Miyazaki and T. Mukaiyama, *Chem. Eur. J.*, 2003, **9**, 4485–4509.
- <sup>9</sup> Y. Kubota, S. Tanaka, K. Funabiki and M. Matsui, *Org. Lett.*, 2012, **14**, 4682–4685
- <sup>10</sup> Z.-Q. Zhu, X.-L. Zheng, N-F. Jiang, X. Wan and J-C. Xiao, *Chem. Commun.*, 2011, **47**, 8670–8672.
- <sup>11</sup> Z. Rong, M. Jia and S. You, *Org. Lett.*, 2011, **13**, 4080–4083
